# Supplementary material for: Transcriptomic, Hormonomic and Metabolomic Analyses Highlighted the Common Modules Related to Photosynthesis, Sugar Metabolism and Cell Division in Parthenocarpic Tomato Fruits during Early Fruit Set
Source: Cells. 2022 Apr 22;11(9):1420. doi: 10.3390/cells11091420 (PMC9102895; doi:10.3390/cells11091420)
Supplement: Supplementary file 1 [file cells-11-01420-s001.zip]

Archive with 4 entries (4 files):
- Supplementary Datasets S1¿CS7.xlsx
- Supplementary Figures S1¿CS9.pdf
- Supplementary Methods S1.pdf
- Supplementary Table S1.xlsx
