# Supplementary material for: Transcriptomic, Hormonomic and Metabolomic Analyses Highlighted the Common Modules Related to Photosynthesis, Sugar Metabolism and Cell Division in Parthenocarpic Tomato Fruits during Early Fruit Set
Source: Cells. 2022 Apr 22;11(9):1420. doi: 10.3390/cells11091420 (PMC9102895; doi:10.3390/cells11091420)
Supplement: Supplementary file 1 [file cells-11-01420-s001.zip › Supplementary Datasets S1¿CS7.xlsx]

## Sheet: Dataset S1
Dataset S1. Hormonome data set of WT and the MT tomato.
unit, pmol/g FW.
N.D., not detected.
* The corresponding internal standard cocannot be detected.
MT-B and sldella
	B1	B3	B5	Ave.	S.D.	%S.D.	B7	B9	B11	Ave.	S.D.	%S.D.	B13	B15	B17	Ave.	S.D.	%S.D.	B19	B21	B23	Ave.	S.D.	%S.D.	B25	B27	B29	Ave.	S.D.	%S.D.	B31	B33	B35	Ave.	S.D.	%S.D.	d1	d4	d5	Ave.	S.D.	%S.D.	d7	d9	d11	Ave.	S.D.	%S.D.	d13
	MT-B_DAF-2	MT-B_DAF-2	MT-B_DAF-2				MT-B_DAF0	MT-B_DAF0	MT-B_DAF0				MT-B_DAF2P	MT-B_DAF2P	MT-B_DAF2P				MT-B_DAF4P	MT-B_DAF4P	MT-B_DAF4P				MT-B_DAF2E	MT-B_DAF2E	MT-B_DAF2E				MT-B_DAF4E	MT-B_DAF4E	MT-B_DAF4E				della_DAF-2	della_DAF-2	della_DAF-2				della_DAF0	della_DAF0	della_DAF0				della_DAF2P
	97	98	99				100	101	102				103	104	105				106	107	108				109	110	111				112	113	114				115	116	117				118	119	120				121
	3.96825	5.58679	2.70313	4.08606	1.44544	35.3748	6.99717	15.3866	9.96564	10.7831	4.25405	39.451	10.9782	12.542	12.1427	11.8877	0.812525	6.83503	15.222	10.4393	11.0914	12.2509	2.59362	21.1708	10.1664	5.23958	4.018	6.47467	3.25498	50.2725	0.356824	1.45886	1.8642	1.22663	0.780062	63.5939	5.66229	1.97044	2.4018	3.34485	2.01852	60.3473	7.18612	8.56302	5.31046	7.01987	1.63264	23.2574	5.53568
tZR	1.57828	1.81554	13.1579	5.51724	6.61806	119.952	*	23.9096	18.8312	21.3704	-	-	6.53846	6.87285	6.45717	6.62283	0.22031	3.32653	12.7798	5.05263	9.0036	8.94534	3.8639	43.1946	20.4082	77.7935	73.5294	57.2437	31.9717	55.8519	1.72563	0.845023	2.06271	1.54445	0.628734	40.7092	1.2273	15.873	8.59107	8.56379	7.3229	85.51	*	*	46.1361	46.1361	-	-	14.0126
tZRPs	32.3967	33.8925	27.2817	31.1903	3.46655	11.1142	341.318	246.351	293.756	293.808	47.4837	16.1614	137.186	150.284	154.367	147.279	8.97641	6.09483	214.855	122.54	176.765	171.387	46.3918	27.0685	239.21	244.517	274.149	252.625	18.8279	7.4529	26.6274	18.2218	34.4412	26.4301	8.11149	30.6903	50.0414	63.2507	56.8111	56.7011	6.60535	11.6494	314.499	342.765	354.802	337.355	20.6886	6.13259	93.2019
cZ	0.901876	1.08131	1.43107	1.13809	0.269126	23.6472	2.09915	1.95042	1.54639	1.86532	0.286036	15.3344	0.504745	0.689123	0.560433	0.584767	0.0945671	16.1718	0.684135	0.869943	0.682547	0.745542	0.107738	14.4509	0.941336	1.26473	2.14293	1.44966	0.621781	42.8913	1.96253	1.45886	1.44994	1.62378	0.293406	18.0694	1.17151	1.47783	1.10852	1.25262	0.197564	15.772	3.84971	4.5491	2.24673	3.54851	1.18037	33.2637	0.638733
cZR	4.73485	5.44662	39.4737	16.5517	19.8542	119.952	*	13.0416	7.79221	10.4169	-	-	0.769231	N.D.	N.D.	0.769231	-	-	N.D.	N.D.	N.D.	0	-	-	7.93651	31.8246	27.5735	22.4449	12.7431	56.7753	8.62813	5.91516	3.60974	6.05101	2.51195	41.513	3.68189	21.164	12.8866	12.5775	8.74517	69.5302	*	*	17.301	17.301	-	-	1.0009
cZRPs	27.5347	27.0948	25.397	26.6755	1.12886	4.23182	32.4516	27.9594	23.8713	28.0941	4.29173	15.2763	10.8024	13.1977	10.121	11.3737	1.61593	14.2076	10.0554	15.6743	12.0722	12.6006	2.84649	22.5901	19.2354	23.4592	22.2527	21.6491	2.17563	10.0495	28.4403	25.5543	29.7167	27.9038	2.13242	7.64204	29.5626	31.2633	29.1953	30.0071	1.10334	3.67695	31.7519	31.0097	27.3644	30.042	2.34839	7.81703	15.5925
DZ	N.D.	N.D.	N.D.	0	-	-	N.D.	N.D.	N.D.	0	-	-	N.D.	N.D.	N.D.	0	-	-	6.15721	N.D.	N.D.	6.15721	-	-	N.D.	N.D.	N.D.	0	-	-	N.D.	N.D.	N.D.	0	-	-	N.D.	N.D.	N.D.	0	-	-	N.D.	N.D.	N.D.	0	-	-	N.D.
DZR	12.6263	13.0305	16.7241	14.1269	2.25822	15.9852	16.8221	18.4343	15.4255	16.894	1.50568	8.91252	7.39645	9.1531	13.2013	9.91696	2.97687	30.018	3.30382	2.99529	4.47547	3.59153	0.780908	21.743	19.2251	12.0158	13.5896	14.9435	3.79056	25.366	6.53358	13.0497	9.22151	9.6016	3.27466	34.1053	25.0152	11.4469	16.344	17.602	6.87106	39.0357	19.2864	18.6109	23.9992	20.6322	2.93543	14.2274	10.553
DZRPs	1.25437	1.26031	0.984381	1.16636	0.157623	13.5142	12.6352	7.58495	11.3451	10.5217	2.62385	24.9374	13.3834	12.6529	15.2131	13.7498	1.31886	9.59184	17.483	13.3603	15.9244	15.5892	2.08167	13.3532	7.8554	7.38753	8.76159	8.00151	0.698587	8.73069	0.706991	0.546704	0.82815	0.693948	0.141175	20.3438	2.77053	3.9022	2.86008	3.1776	0.629117	19.7985	12.2549	14.7196	16.155	14.3765	1.97254	13.7206	6.54842
iP	N.D.	N.D.	N.D.	0	-	-	N.D.	N.D.	N.D.	0	-	-	N.D.	N.D.	N.D.	0	-	-	N.D.	N.D.	N.D.	0	-	-	N.D.	N.D.	N.D.	0	-	-	N.D.	N.D.	N.D.	0	-	-	N.D.	N.D.	N.D.	0	-	-	N.D.	N.D.	N.D.	0	-	-	N.D.
iPR	0.446947	0.550782	0.398724	0.465485	0.0777054	16.6934	0.582411	1.19861	1.04167	0.940896	0.320221	34.0336	N.D.	N.D.	N.D.	0	-	-	N.D.	N.D.	N.D.	0	-	-	0.7503	0.426767	0.475919	0.550995	0.174344	31.6417	N.D.	N.D.	0.409132	0.409132	-	-	0.560287	0.618429	0.560287	0.579668	0.0335685	5.79099	0.784314	0.471476	0.60518	0.620323	0.156968	25.3042	N.D.
iPRPs	169.406	185.595	179.879	178.293	8.21015	4.60486	211.595	228.122	232.125	223.947	10.8832	4.8597	113.715	117.813	152.287	127.938	21.1858	16.5594	120.856	113.307	125.672	119.945	6.23258	5.19619	158.921	177.042	170.976	168.98	9.22438	5.45887	77.0847	60.8377	78.544	72.1555	9.82856	13.6214	135.741	154.297	139.14	143.059	9.87943	6.90583	246.346	241.219	256.433	248	7.74066	3.12124	135.787
tZ7G	142.935	150.538	142.323	145.266	4.57655	3.15047	192.853	200.867	200.853	198.191	4.62298	2.33259	182.871	180.877	160.489	174.746	12.3871	7.08864	203.127	119.608	171.068	164.601	42.133	25.597	324.344	357.812	344.374	342.177	16.8418	4.92196	356.516	390.884	377.402	374.934	17.3164	4.61851	136.034	135.504	141.044	137.527	3.05666	2.22258	192.755	186.346	170.393	183.165	11.5152	6.28678	127.747
tZ9G	5.92001	6.06757	5.4355	5.80769	0.330664	5.69355	8.12581	6.54351	7.01299	7.22744	0.812659	11.2441	7.37753	7.6554	6.91613	7.31636	0.373413	5.10382	5.79101	4.10116	3.98597	4.62605	1.01053	21.8443	7.97194	6.96333	7.34376	7.42634	0.509349	6.85867	8.9653	9.24473	8.6724	8.96081	0.286193	3.19383	6.76318	7.22674	7.61481	7.20158	0.426372	5.92053	8.90241	9.35094	7.66787	8.64041	0.871585	10.0873	6.65228
tZOG	N.D.	N.D.	N.D.	0	-	-	34.7403	27.6515	33.2653	31.8857	3.74038	11.7306	94.1386	64.3804	43.2385	67.2525	25.5713	38.0229	28.4637	22.0899	21.934	24.1625	3.72572	15.4194	184.574	116.337	132.403	144.438	35.6749	24.6991	121.51	133.891	135.946	130.449	7.80919	5.98639	N.D.	N.D.	N.D.	0	-	-	40.9531	27.7711	44.8271	37.8504	8.94132	23.6228	41.352
cZOG	9.31647	12.7396	10.8295	10.9619	1.71538	15.6486	16.5017	12.904	11.2245	13.5434	2.69605	19.9068	N.D.	10.5197	N.D.	10.5197	-	-	N.D.	N.D.	N.D.	0	-	-	28.0112	18.8738	11.3705	19.4185	8.3337	42.9163	12.5858	18.4789	16.1596	15.7415	2.96872	18.8592	16.4011	12.0203	15.4364	14.6193	2.30185	15.7453	6.61868	4.48477	13.2224	8.10861	4.55538	56.1795	N.D.
tZROG	1.70242	1.98059	1.76616	1.81639	0.14573	8.02306	13.6843	10.3102	14.3791	12.7912	2.17653	17.0158	20.4265	17.5893	15.0348	17.6835	2.69705	15.2518	10.8225	10.131	9.76987	10.2411	0.534898	5.22304	38.8504	36.3036	44.9061	40.02	4.41888	11.0417	54.3743	66.5808	65.1381	62.0311	6.67003	10.7527	2.65703	3.35345	2.55602	2.8555	0.434187	15.2053	12.7324	13.1043	17.0352	14.2906	2.38414	16.6833	25.0465
cZROG	2.83736	N.D.	2.11939	2.47838	-	-	3.62231	4.2959	4.57516	4.16446	0.489835	11.7623	2.74014	2.19866	1.83352	2.25744	0.456158	20.2069	N.D.	N.D.	N.D.	0	-	-	5.61693	6.60066	5.14192	5.7865	0.744009	12.8577	5.92541	7.51718	6.07956	6.50738	0.877902	13.4909	2.12562	2.01207	2.55602	2.23124	0.286941	12.8602	2.86478	2.32964	2.78125	2.65856	0.287895	10.829	2.3239
tZRPsOG	N.D.	N.D.	N.D.	0	-	-	0.752355	0.935649	1.00865	0.898883	0.132042	14.6895	0.597759	0.577675	0.70407	0.626502	0.067923	10.8416	0.43719	0.350543	0.352473	0.380069	0.0494781	13.0182	1.69885	2.58653	2.38991	2.2251	0.466222	20.9529	3.79582	3.44737	7.39493	4.87937	2.18549	44.7904	N.D.	0.127779	0.0957222	0.111751	-	-	0.660514	0.703624	0.984329	0.782823	0.175836	22.4618	1.66522
cZRPsOG	N.D.	N.D.	N.D.	0	-	-	N.D.	N.D.	N.D.	0	-	-	N.D.	N.D.	N.D.	0	-	-	N.D.	N.D.	N.D.	0	-	-	N.D.	N.D.	N.D.	0	-	-	0.169962	N.D.	N.D.	0.169962	-	-	N.D.	N.D.	N.D.	0	-	-	N.D.	N.D.	N.D.	0	-	-	N.D.
DZ9G	N.D.	N.D.	N.D.	0	-	-	N.D.	N.D.	N.D.	0	-	-	N.D.	N.D.	N.D.	0	-	-	N.D.	N.D.	N.D.	0	-	-	N.D.	N.D.	N.D.	0	-	-	N.D.	N.D.	N.D.	0	-	-	N.D.	N.D.	N.D.	0	-	-	N.D.	N.D.	N.D.	0	-	-	N.D.
iP7G	429.035	386.891	224.311	346.746	108.105	31.1771	413.75	546.902	555.273	505.308	79.4025	15.7137	419.73	446.76	359.046	408.512	44.9204	10.9961	274.028	250.373	270.933	265.112	12.8572	4.84973	740.782	733.065	603.415	692.421	77.1778	11.1461	825.008	913.51	923.492	887.337	54.2085	6.10913	277.271	229.502	197.777	234.85	40.0156	17.0388	191.391	242.929	339.622	257.981	75.2531	29.17	352.926
iP9G	1.665	1.42086	1.67973	1.58853	0.145395	9.1528	3.15989	3.59583	3.44828	3.40133	0.221728	6.51886	2.4529	2.14777	2.5606	2.38709	0.214142	8.97083	1.26646	0.730994	1.523	1.17349	0.404105	34.4363	6.05327	7.39729	7.73994	7.0635	0.891502	12.6213	6.86499	8.59107	7.1862	7.54742	0.917983	12.1629	0.736377	1.0352	0.758035	0.843203	0.166624	19.7608	3.5014	3.20865	3.63108	3.44705	0.216396	6.27772	1.01133
GA1	24.361	9.15253	10.87	14.7945	8.32922	56.2994	N.D.	N.D.	N.D.	0	-	-	11.2879	7.09511	5.91263	8.09854	2.82462	34.8781	45.8559	55.8777	55.0552	52.263	5.56386	10.6459	N.D.	N.D.	N.D.	0	-	-	N.D.	N.D.	N.D.	0	-	-	5.46546	6.44768	6.04468	5.98594	0.49374	8.24833	1.11985	0.853675	N.D.	0.986762	-	-	1.18979
GA3	N.D.	N.D.	N.D.	0	-	-	N.D.	N.D.	N.D.	0	-	-	N.D.	N.D.	N.D.	0	-	-	N.D.	N.D.	N.D.	0	-	-	N.D.	N.D.	N.D.	0	-	-	N.D.	N.D.	N.D.	0	-	-	N.D.	N.D.	N.D.	0	-	-	N.D.	N.D.	N.D.	0	-	-	N.D.
GA4	207.575	178.449	229.09	205.038	25.4157	12.3956	58.9318	N.D.	41.3649	50.1484	-	-	68.3895	75.223	61.3435	68.3187	6.94003	10.1583	270.904	291.59	318.763	293.752	24.0028	8.17109	52.4042	N.D.	N.D.	52.4042	-	-	N.D.	N.D.	N.D.	0	-	-	163.795	99.1489	132.957	131.967	32.3345	24.502	45.8859	N.D.	41.3147	43.6003	-	-	51.787
GA7	N.D.	N.D.	N.D.	0	-	-	N.D.	N.D.	N.D.	0	-	-	N.D.	N.D.	N.D.	0	-	-	N.D.	N.D.	N.D.	0	-	-	N.D.	N.D.	N.D.	0	-	-	N.D.	N.D.	N.D.	0	-	-	N.D.	N.D.	N.D.	0	-	-	N.D.	N.D.	N.D.	0	-	-	N.D.
GA8	96.6423	54.5865	60.7222	70.6503	22.7178	32.1553	25.2384	17.0221	27.6063	23.2889	5.55486	23.8519	44.7703	34.1221	30.197	36.3632	7.54069	20.7372	91.8586	117.978	113.835	107.89	14.0377	13.0111	9.26109	6.58081	10.3128	8.71825	1.92433	22.0724	1.97107	6.07893	4.6097	4.2199	2.08148	49.3254	44.3073	69.2111	49.1194	54.2126	13.21	24.3671	3.93291	6.8686	4.61355	5.13835	1.5366	29.9045	5.88282
GA9	N.D.	N.D.	N.D.	0	-	-	N.D.	N.D.	N.D.	0	-	-	N.D.	N.D.	N.D.	0	-	-	44.4053	38.8077	62.3737	48.5289	12.3122	25.3709	N.D.	N.D.	N.D.	0	-	-	N.D.	N.D.	N.D.	0	-	-	N.D.	N.D.	N.D.	0	-	-	N.D.	N.D.	N.D.	0	-	-	N.D.
GA19	1058.59	1120.79	1146.84	1108.74	45.3416	4.08948	269.929	231.75	258.884	253.521	19.6466	7.74949	416.873	367.66	392.537	392.356	24.6066	6.27148	539.43	478.593	404.027	474.017	67.8175	14.307	144.174	143.436	140.061	142.557	2.19273	1.53814	90.9248	114.969	111.47	105.788	12.9901	12.2794	779.449	731.972	775.399	762.273	26.3201	3.45284	224.789	278.609	227.575	243.657	30.301	12.4359	167.037
GA20	21.5076	11.7161	12.6487	15.2908	5.40407	35.3419	4.98827	6.48938	5.19923	5.55896	0.81264	14.6186	23.9464	18.317	14.9387	19.0674	4.55051	23.8655	110.177	106.304	99.7347	105.405	5.27866	5.00797	5.69839	3.94989	5.29309	4.98046	0.915216	18.3762	4.09314	5.48634	3.36536	4.31495	1.07775	24.9771	11.9097	13.4467	9.97351	11.7767	1.74043	14.7786	2.9743	4.09176	3.8728	3.64629	0.592166	16.2402	9.3652
GA24	20.3174	18.6029	17.7136	18.878	1.32351	7.01087	11.3022	7.63352	8.70111	9.21226	1.88697	20.4833	6.22173	6.48551	4.30158	5.66961	1.19206	21.0255	4.04177	7.3707	6.00388	5.80545	1.67331	28.8231	5.16257	6.03978	7.58717	6.26317	1.22764	19.6009	5.2993	4.82514	3.31703	4.48049	1.0351	23.1024	16.4486	12.3239	15.0269	14.5998	2.09523	14.3511	4.85409	4.96026	5.70915	5.1745	0.466055	9.00676	N.D.
GA44	3.67001	3.39003	3.64327	3.56777	0.154508	4.33066	N.D.	N.D.	1.28218	1.28218	-	-	13.6914	11.4292	13.049	12.7232	1.16575	9.16246	20.0364	15.2397	14.6711	16.649	2.94725	17.7022	N.D.	N.D.	N.D.	0	-	-	N.D.	N.D.	N.D.	0	-	-	N.D.	1.99591	1.60292	1.79942	-	-	N.D.	N.D.	N.D.	0	-	-	2.30683
GA53	2421.08	2216.96	1998.74	2212.26	211.213	9.54737	389.143	227.016	319.067	311.742	81.3112	26.0829	818.693	722.704	804.056	781.818	51.7145	6.61464	376.401	360.055	317.761	351.406	30.2619	8.61167	371.443	307.674	371.638	350.252	36.8734	10.5277	75.3584	81.5878	87.2187	81.3883	5.93268	7.28935	1819.38	1277.34	1705.92	1600.88	285.878	17.8575	246.147	306.069	267.026	273.081	30.4164	11.1382	285.348
ABA	9051.87	7782.14	8987.67				9419.2	9322.99	7625.49				2191.93	2513.47	1720.78				1733.62	2295.6	1675.23				5178.72	7138.05	6667.51				8053.95	7321.6	9672.99				10138.6	10216.6	9370.03				11289.6	10036.1	7431.37				4083.55
IAA	366.081	376.037	426.79	389.636	32.5595	8.35639	260.042	341.433	313.172	304.882	41.324	13.5541	889.459	866.722	695.552	817.244	106	12.9704	754.414	1045.97	1061.92	954.1	173.118	18.1446	264.188	329.246	291.107	294.847	32.6899	11.0871	570.124	606.368	628.468	601.653	29.456	4.89584	379.49	299.955	383.776	354.407	47.2052	13.3195	270.512	300.047	221.492	264.017	39.678	15.0286	505.018
IAAla	N.D.	N.D.	N.D.	0	-	-	N.D.	N.D.	N.D.	0	-	-	N.D.	N.D.	N.D.	0	-	-	N.D.	N.D.	N.D.	0	-	-	N.D.	N.D.	N.D.	0	-	-	N.D.	N.D.	N.D.	0	-	-	N.D.	N.D.	N.D.	0	-	-	N.D.	N.D.	N.D.	0	-	-	N.D.
IAAsp	7.87446	N.D.	6.92118	7.39782	-	-	11.8157	13.2851	28.8613	17.9874	9.44575	52.5132	577.973	504.458	415.062	499.164	81.5843	16.3442	114.32	99.4663	91.7274	101.838	11.4814	11.2742	22.0506	27.0838	23.2485	24.1276	2.62925	10.8972	20.8296	22.37	21.5517	21.5838	0.770696	3.57072	8.36159	8.4325	9.5747	8.7896	0.680846	7.74604	14.3589	18.172	15.2812	15.9374	1.98944	12.4829	75.4456
IAIle+IALeu	N.D.	N.D.	N.D.	0	-	-	N.D.	N.D.	N.D.	0	-	-	N.D.	N.D.	N.D.	0	-	-	N.D.	N.D.	N.D.	0	-	-	N.D.	N.D.	N.D.	0	-	-	N.D.	N.D.	N.D.	0	-	-	N.D.	N.D.	N.D.	0	-	-	N.D.	N.D.	N.D.	0	-	-	N.D.
IAPhe	N.D.	N.D.	N.D.	0	-	-	N.D.	N.D.	N.D.	0	-	-	N.D.	N.D.	N.D.	0	-	-	N.D.	N.D.	N.D.	0	-	-	N.D.	N.D.	N.D.	0	-	-	N.D.	N.D.	N.D.	0	-	-	N.D.	N.D.	N.D.	0	-	-	N.D.	N.D.	N.D.	0	-	-	N.D.
IATrp	N.D.	N.D.	N.D.	0	-	-	N.D.	N.D.	N.D.	0	-	-	N.D.	N.D.	N.D.	0	-	-	N.D.	N.D.	N.D.	0	-	-	N.D.	N.D.	N.D.	0	-	-	N.D.	N.D.	N.D.	0	-	-	N.D.	N.D.	N.D.	0	-	-	N.D.	N.D.	N.D.	0	-	-	N.D.
				0	-	-				0	-	-				0	-	-				0	-	-				0	-	-				0	-	-				0	-	-				0	-	-
SA	19518.1	14522.2	28085.1	20708.5	6859.37	33.1235	940079	618339	359237	639218	290983	45.5217	166957	268097	109329	181461	80371.5	44.2913	15081.5	70530.3	19826.2	35146	30735.4	87.4508	285670	223159	231998	246942	33828.9	13.6991	88043.5	205082	157730	150285	58873.3	39.1744	27689.9	35940.9	34799	32809.9	4470.67	13.626	1.00093e+06	1.44272e+06	650721	1.03146e+06	396879	38.4775	85456.7
JA	79389.7	116828	186481	127566	54347.1	42.6031	960.177	524.153	512.376	665.569	255.206	38.3441	736.645	897.136	467.206	700.329	217.254	31.0216	2770.34	21930.6	2492.15	9064.37	11143.4	122.936	1285.82	1575.59	1133.2	1331.53	224.711	16.8761	4206.8	1166.59	1267.47	2213.62	1726.88	78.0117	125698	80246.7	98242	101395	22889.1	22.574	1590.21	2800.87	1489.68	1960.25	729.728	37.2262	877.607
[truncated: 136 more columns]

## Sheet: Dataset S2
Dataset S2. Metabolome dataset of WT and the MT tomato.			MTJ_vs_sliaa9
samplename			MT-J_DAF-2	MT-J_DAF-2	MT-J_DAF-2	MT-J_DAF-2	MT-J_DAF-2	MT-J_DAF-2	iaa9_DAF-2	iaa9_DAF-2	iaa9_DAF-2	iaa9_DAF-2	iaa9_DAF-2	iaa9_DAF-2	MT-J_DAF2E	MT-J_DAF2E	MT-J_DAF2E	MT-J_DAF2E	MT-J_DAF2E	MT-J_DAF2E	MT-J_DAF4E	MT-J_DAF4E	MT-J_DAF4E	MT-J_DAF4E	MT-J_DAF4E	iaa9_DAF2E	iaa9_DAF2E	iaa9_DAF2E	iaa9_DAF2E	iaa9_DAF2E	iaa9_DAF2E	iaa9_DAF4E	iaa9_DAF4E	iaa9_DAF4E	iaa9_DAF4E	iaa9_DAF4E	iaa9_DAF4E	MT-J_DAF4P	MT-J_DAF4P	MT-J_DAF4P	MT-J_DAF4P	MT-J_DAF4P	MT-J_DAF4P	MT-J_DAF2P	MT-J_DAF2P	MT-J_DAF2P	MT-J_DAF2P	MT-J_DAF2P	MT-J_DAF2P
synonym	KEGG	source	TP_059_1	TP_060_1	TP_061_1	TP_062_1	TP_063_1	TP_064_1	TP_065_1	TP_066_1	TP_067_1	TP_068_1	TP_069_1	TP_070_1	TP_071_1	TP_072_1	TP_073_1	TP_074_1	TP_075_1	TP_076_1	TP_077_1	TP_078_1	TP_079_1	TP_080_1	TP_081_1	TP_083_1	TP_084_1	TP_085_1	TP_086_1	TP_087_1	TP_088_1	TP_089_1	TP_090_1	TP_091_1	TP_092_1	TP_093_1	TP_094_1	TP_095_1	TP_096_1	TP_097_1	TP_098_1	TP_099_1	TP_100_1	TP_101_1	TP_102_1	TP_103_1	TP_104_1	TP_105_1	TP_106_1
C00002268:Tomatine|Toma02:alpha-Tomatine isomer|Toma01:alpha-Tomatine|	C10827	LC	4.7353	4.73342	4.63767	4.47648	4.68714	4.80016	4.33422	4.57981	4.4028	4.44491	4.61998	4.53668	4.63573	4.50827	4.58076	4.63683	4.5683	4.80972	4.50139	4.56736	4.62906	4.65783	4.72292	4.7677	4.79321	4.80713	4.5789	4.69605	4.70572	4.80764	4.64038	4.58888	4.79987	4.75858	4.80878	4.90594	4.91148	4.71081	4.69769	4.77592	4.77375	4.5308	4.50188	4.44398	4.46516	4.39615	4.76354
C00000998:Prunin|	C09099	LC	-5.6429	-5.55208	-5.80195	-5.81434	-5.77594	-5.62404	-5.84678	-5.69251	-5.79111	-5.6958	-5.7067	-5.66145	-5.6837	-5.70793	-5.55146	-5.56837	-5.2052	-5.27547	-4.82326	-5.27573	-5.57669	-5.60539	-5.04511	-5.76471	-5.81426	-5.7108	-5.79317	-5.81769	-5.85183	-5.67547	-5.75606	-5.75084	-5.74027	-5.74221	-5.78107	-5.7682	-5.85362	-5.7647	-5.80229	-5.78454	-5.77935	-5.79406	-5.77051	-5.40318	-5.8168	-5.8672	-5.50909
Toma50:Hydroxytomatine isomer #4|C00043689:Lycoperoside H|Toma49:Hydroxytomatine isomer #3|Toma48:Hydroxytomatine isomer #2|Toma51:Hydroxytomatine isomer #5|Toma53:Hydroxytomatine isomer #7|		LC	-5.6429	-5.55208	-5.80195	-5.81434	-5.77594	-5.62404	-5.84678	-5.69251	-5.79111	-5.6958	-5.7067	-5.66145	-5.6837	-5.70793	-5.55146	-5.63876	-5.56134	-5.56433	-5.66148	-5.6697	-5.57669	-5.60539	-5.45436	-5.76471	-5.81426	-5.7108	-5.79317	-5.81769	-5.85183	-5.67547	-5.75606	-5.75084	-5.74027	-5.74221	-5.78107	-5.7682	-5.85362	-5.7647	-5.80229	-5.78454	-5.77935	-5.79406	-5.77051	-5.75782	-5.8168	-5.8672	-5.67904
C00007249:Tetrahydrofolate|	C00101	LC	-5.6429	-5.55208	-5.80195	-5.81434	-5.77594	-5.62404	-5.84678	-5.69251	-5.79111	-5.6958	-5.7067	-5.66145	-5.6837	-5.70793	-5.55146	-5.63876	-5.07719	-4.88987	-5.66148	-5.6697	-5.57669	-5.60539	-5.45436	-5.76471	-5.81426	-5.7108	-5.79317	-5.81769	-5.85183	-5.67547	-5.75606	-5.75084	-5.74027	-5.74221	-5.78107	-5.7682	-5.85362	-5.7647	-5.80229	-5.78454	-5.77935	-5.79406	-5.77051	-5.75782	-5.8168	-5.8672	-5.67904
C00001200:Pyruvic acid|	C00022	LC	-3.4706	-3.13375	-3.19191	-3.28448	-3.52045	-3.18929	-5.84678	-3.17404	-5.79111	-3.2202	-5.7067	-5.66145	-5.6837	-3.22768	-2.93429	-2.90653	-3.18228	-3.43522	-5.66148	-3.34206	-3.08258	-2.99581	-2.86012	-5.76471	-3.18073	-5.7108	-5.79317	-3.30785	-3.25342	-3.79682	-3.5665	-3.70523	-5.74027	-5.74221	-5.78107	-3.48336	-3.51916	-5.7647	-3.60842	-5.78454	-3.54731	-5.79406	-3.22134	-5.75782	-5.8168	-3.64379	-3.20634
C00005374:Quercetin 3-O-L-rhamnoside|	C01750	LC	-1.68556	-1.32266	-1.34379	-1.84784	-1.85888	-1.5629	-1.92325	-1.71945	-1.86628	-1.6179	-1.53739	-1.69965	-1.37662	-1.38738	-1.31466	-1.43181	-1.25678	-1.23166	-1.32171	-1.23486	-1.28994	-1.37132	-1.09592	-1.35599	-1.13409	-1.06243	-1.34331	-1.13716	-1.19211	-1.51705	-1.7949	-1.67548	-1.35794	-1.59024	-1.53436	-2.01613	-2.55419	-1.98464	-2.26388	-2.87849	-2.28759	-1.88153	-1.84925	-1.69093	-2.20343	-2.08447	-1.54951
C00007413:Glyceraldehyde|C00001191:L-Lactic acid|	C00577|C02154|C02426	LC	-4.03378	-4.1013	-4.30329	-4.35415	-4.1452	-4.04348	-4.31374	-4.17484	-4.17562	-4.09263	-4.12105	-4.12411	-4.10172	-4.32354	-4.10897	-3.85315	-4.34124	-3.93198	-4.39785	-4.38225	-4.16782	-4.09858	-4.38934	-3.83837	-4.1672	-4.30843	-4.31004	-3.99686	-4.16902	-4.10766	-4.24023	-4.40123	-4.38578	-4.35283	-4.33865	-4.05207	-4.05488	-4.3031	-4.22493	-3.97718	-4.25789	-3.99507	-4.08041	-4.22129	-4.00517	-4.35651	-4.07909
C00001332:L-Alanine|C00001333:beta-Alanine|	C00041|C00133|C01401	LC	-4.01699	-3.55816	-3.92689	-3.92741	-3.66359	-3.98527	-3.73392	-3.36738	-3.30694	-3.26027	-3.56212	-3.44174	-2.30754	-2.46121	-2.03429	-1.98295	-1.98264	-1.91155	-1.60554	-1.64185	-1.65994	-1.68785	-1.38021	-1.91186	-1.5571	-1.6334	-1.85649	-1.51497	-1.78588	-1.359	-1.44038	-1.42626	-1.42808	-1.59062	-1.44321	-1.81603	-1.963	-2.13037	-1.8987	-1.76387	-1.863	-2.03404	-1.9284	-1.51831	-2.12492	-2.1254	-1.50879
C00007406:4-Hydroxypyridine|C00007405:2-Hydroxypyridine|	C02502	LC	-5.6429	-5.55208	-5.67498	-5.81434	-5.77594	-5.62404	-5.84678	-5.69251	-5.79111	-5.6958	-5.7067	-5.66145	-5.6837	-5.70793	-5.55146	-5.63876	-5.56134	-5.37944	-5.66148	-5.64396	-5.57669	-5.60539	-5.45436	-5.76471	-5.81426	-5.27211	-5.79317	-5.81769	-5.85183	-5.67547	-5.75606	-5.75084	-5.74027	-5.74221	-5.78107	-5.7682	-5.85362	-5.7647	-5.80229	-5.78454	-5.77935	-5.4067	-5.71705	-5.75782	-5.8168	-5.73978	-5.67904
C00035779:"1,5-Heptadien-3-yne"|		LC	-5.6429	-5.55208	-5.80195	-5.81434	-5.77594	-5.62404	-5.84678	-5.69251	-5.79111	-5.6958	-5.7067	-5.66145	-5.50228	-4.91549	-4.87339	-5.17618	-4.98603	-5.04027	-5.01001	-4.68858	-4.80945	-4.83646	-4.39362	-5.74669	-5.81426	-5.7108	-5.79317	-5.81769	-5.85183	-5.67547	-5.75606	-5.75084	-5.74027	-5.74221	-5.78107	-5.7682	-5.85362	-5.7647	-5.80229	-5.78454	-5.77935	-5.79406	-5.77051	-5.66119	-5.8168	-5.8672	-5.67904
C00007566:1-Aminocyclopropane-1-carboxylate|	C01234	LC	-5.6429	-5.55208	-5.80195	-5.81434	-5.77594	-5.62404	-5.84678	-5.69251	-5.79111	-5.6958	-5.7067	-5.66145	-4.44643	-4.26758	-4.03949	-4.23931	-4.12929	-3.83556	-3.3746	-3.80259	-3.55948	-3.58178	-3.3661	-5.76471	-5.81426	-5.7108	-5.79317	-5.81769	-5.85183	-5.67547	-5.75606	-5.75084	-5.74027	-5.74221	-5.78107	-5.63858	-5.85362	-5.7647	-5.80229	-5.78454	-5.77935	-4.59494	-4.92573	-4.1075	-5.20327	-4.82176	-4.31764
C00000353:(Z)-3-Hexenal|C00000351:trans-2-Hexenal|	C16310	LC	-5.6429	-5.55208	-5.80195	-5.81434	-5.77594	-5.62404	-5.84678	-5.69251	-5.79111	-5.6958	-5.7067	-5.66145	-5.6837	-5.70793	-5.55146	-5.63876	-5.56134	-5.56433	-5.66148	-5.6697	-5.57669	-5.60539	-5.45436	-5.76471	-5.81426	-5.7108	-5.79317	-5.81769	-5.85183	-5.67547	-5.75606	-5.75084	-5.74027	-5.74221	-5.78107	-5.7682	-5.85362	-5.7647	-5.80229	-5.78454	-5.77935	-5.79406	-5.77051	-5.75782	-5.81392	-5.8672	-5.56268
C00007530:Sulfate|C00007408:Phosphate|	C00059	LC	-5.6429	-5.55208	-5.71102	-5.81434	-5.77594	-5.62404	-5.84678	-5.69251	-5.79111	-5.0758	-5.7067	-5.66145	-5.6837	-5.35766	-5.18198	-5.63876	-5.56134	-5.34165	-5.66148	-5.37047	-5.57669	-5.30059	-5.45436	-5.76471	-5.81426	-5.7108	-5.79317	-5.81769	-5.85183	-5.67547	-5.75606	-5.57699	-5.74027	-5.74221	-5.78107	-5.7682	-5.85362	-5.7647	-5.80229	-5.78454	-5.77935	-5.79406	-5.77051	-5.75782	-5.8168	-5.8672	-5.67904
C00007530:Sulfate|	C00059	LC	-0.540055	-0.442394	-0.666083	-0.879429	-0.791126	-0.645767	-0.73866	-0.632634	-0.701633	-0.787521	-0.720378	-0.753093	-1.08229	-1.08465	-1.1681	-0.953556	-0.901937	-0.73116	-0.998151	-1.04509	-0.939958	-1.0086	-0.94906	-1.07995	-1.10556	-0.906206	-0.938606	-0.944565	-0.873844	-1.11134	-0.821104	-0.947257	-0.814265	-0.714725	-0.891416	-0.707932	-0.811231	-0.755842	-0.751686	-0.593844	-0.601556	-0.96121	-0.975821	-1.07025	-0.970072	-0.907599	-0.933354
C00001189:Isovaleric acid|	C08262	LC	-5.6429	-5.55208	-5.80195	-5.81434	-5.77594	-5.62404	-5.84678	-5.69251	-5.79111	-5.6958	-5.7067	-5.66145	-4.63396	-5.70793	-5.55146	-4.56288	-5.56134	-4.11016	-4.54641	-5.6697	-5.57669	-5.60539	-4.35023	-5.14365	-5.17457	-4.75776	-5.27918	-4.949	-5.85183	-5.07483	-4.95035	-5.75084	-4.96738	-5.74221	-5.78107	-5.7682	-5.85362	-5.7647	-4.69929	-5.78454	-5.57453	-4.94286	-4.87987	-5.75782	-4.65459	-4.82036	-4.32466
C00028512:Lycoperoside A|C00028513:Lycoperoside B|C00028514:Lycoperoside C|		LC	-2.02818	-1.64198	-1.69614	-2.19202	-2.37402	-1.99641	-1.40892	-1.37281	-1.40274	-1.24264	-1.47244	-1.40747	-0.183032	-0.256584	-0.437428	-0.0976459	0.113522	-0.0557777	0.385638	0.336012	0.00279365	0.0484736	0.710128	0.560822	0.806978	0.912901	0.835099	0.913519	0.703155	0.562286	0.588242	0.156831	0.602741	0.518322	0.407579	0.131587	-0.657597	-0.462355	-0.00328595	-0.514565	-0.327013	0.260861	0.286489	0.18395	-0.179502	0.0485183	0.587257
C00033849:Fumarate|	C00122	LC	-5.6429	-5.55208	-5.80195	-5.81434	-4.51313	-4.93877	-5.84678	-5.58383	-5.79111	-5.6958	-5.7067	-5.66145	-5.6837	-5.70793	-5.55146	-5.08663	-5.56134	-5.24703	-5.66148	-4.91438	-5.57669	-5.60539	-4.64837	-5.76471	-5.81426	-5.09855	-5.79317	-5.81769	-5.85183	-5.43555	-5.75606	-5.75084	-4.85465	-5.74221	-5.78107	-5.7682	-5.85362	-5.7647	-5.80229	-5.78454	-5.77935	-5.79406	-5.77051	-5.75782	-5.8168	-5.8672	-5.67904
C00000856:4-Hydroxybenzoic acid|C00000206:Salicylic acid|	C00156	LC	-4.78055	-4.41405	-5.80195	-4.55005	-5.16253	-4.43881	-5.12152	-4.39642	-4.96031	-5.6958	-4.99477	-4.58041	-4.68226	-4.41404	-5.55146	-4.23181	-4.07146	-3.92834	-4.24765	-4.23034	-5.52038	-4.11534	-4.0179	-3.85091	-3.91973	-3.70873	-3.93131	-3.66713	-3.982	-3.49532	-3.75405	-3.62286	-3.39655	-3.58009	-3.4332	-2.54314	-2.94967	-2.53298	-2.87538	-2.78489	-2.86901	-3.10141	-3.01312	-3.07573	-3.20272	-3.25858	-2.9463
C00007415:6-Hydroxynicotinic acid|	C01020	LC	-4.06796	-4.15991	-3.89352	-4.02951	-3.68635	-3.93219	-4.17339	-4.29668	-4.34271	-3.99482	-4.40842	-4.15526	-3.96272	-3.83274	-3.49262	-4.01909	-4.17824	-3.64143	-4.75206	-4.3255	-4.29607	-4.36615	-4.70132	-3.83819	-3.9512	-3.98405	-4.27273	-4.03253	-4.11379	-4.56219	-4.50125	-5.05177	-4.94775	-4.7665	-4.73082	-6.57236	-6.0566	-6.9153	-6.86254	-6.7964	-6.81535	-4.01292	-3.90236	-4.78732	-3.86209	-3.87895	-3.91811
C00007420:alpha-Ketopantoate|		LC	-6.46828	-6.75719	-6.83773	-6.841	-5.95489	-6.49155	-6.33911	-6.59781	-6.58369	-6.89482	-6.55063	-6.69018	-3.794	-3.88328	-3.53428	-3.57633	-3.70799	-3.25767	-3.95328	-3.68631	-3.73279	-3.64761	-3.62235	-4.5119	-4.38131	-4.83236	-4.826	-4.71682	-5.07556	-5.52547	-5.0858	-5.77726	-5.54961	-5.74191	-5.67741	-6.14797	-6.46014	-6.60164	-6.12508	-6.7964	-6.81535	-4.25507	-3.89862	-3.99849	-4.28929	-4.40979	-3.71732
C00001181:Citramalic acid|	C02614|C08645|C00815|C02612	LC	-3.57796	-3.07762	-3.42656	-3.19058	-3.53472	-3.42847	-3.75931	-3.50254	-3.72091	-3.32616	-3.52568	-3.3995	-4.05651	-5.70793	-3.53615	-3.69154	-3.87577	-3.67697	-5.66148	-5.6697	-5.57669	-4.03857	-5.45436	-3.40497	-3.29536	-3.05678	-3.30763	-3.2109	-3.01516	-3.03128	-3.44167	-3.40573	-3.39885	-3.28713	-3.32643	-3.53694	-3.57171	-3.4706	-3.56032	-3.66956	-3.35556	-3.27274	-3.24589	-3.50921	-3.32335	-3.44806	-3.03124
C00007622:L-Pantoate|C00001195:Mevalonic acid|	C00418|C02104	LC	-4.31309	-3.96839	-4.63588	-4.54075	-4.57389	-4.12682	-4.53179	-4.16171	-4.67549	-4.09078	-4.49756	-4.08804	-4.31951	-4.54689	-4.25788	-4.61728	-4.20459	-4.32677	-4.65573	-4.83135	-4.29811	-4.43546	-3.9193	-4.69864	-4.95299	-4.71949	-5.42128	-5.19476	-5.21214	-4.75556	-4.79258	-5.39245	-5.16518	-5.18863	-5.32269	-4.64418	-5.28025	-4.79237	-4.44164	-4.58542	-5.23141	-5.10189	-4.67758	-4.18445	-4.65506	-4.62719	-4.15166
C00000170:trans-Cinnamic acid|	C00423|C10438	LC	-3.56125	-3.17171	-3.43811	-3.56969	-3.49024	-3.49355	-3.83716	-3.62429	-3.69755	-3.46336	-3.66616	-3.25413	-2.41969	-2.30865	-1.9714	-2.35247	-2.5543	-2.27214	-1.01923	-1.05772	-1.12355	-1.17318	-0.701861	-3.56766	-3.686	-3.58101	-3.75423	-3.52138	-3.57399	-3.15428	-3.81966	-3.40747	-3.11356	-3.22253	-3.61104	-2.47286	-3.00858	-2.17519	-2.66293	-2.67241	-2.30296	-3.79393	-3.18216	-2.82342	-4.03539	-3.82234	-3.25009
C00030217:Esculeoside B|		LC	-4.59639	-4.24516	-4.54937	-4.73298	-4.40484	-4.16008	-5.2534	-3.9487	-4.75471	-4.53601	-4.51183	-4.46666	-5.47194	-4.59136	-4.77979	-5.63876	-5.56134	-4.59911	-5.5708	-4.93097	-5.57669	-4.77072	-5.45436	-5.76471	-5.81426	-5.7108	-5.79317	-5.81769	-5.54241	-5.67547	-5.75606	-5.75084	-5.74027	-5.74221	-5.78107	-5.7682	-5.85362	-5.7647	-5.80229	-5.78454	-5.77935	-5.79406	-5.77051	-5.75782	-5.8168	-5.8672	-5.67904
C00002683:Vanillin|C00030767:Methyl salicylate|	D00091|C00755	LC	-1.42077	-1.3267	-2.0681	-2.02491	-1.53845	-1.25908	-4.76166	-3.97237	-5.02349	-3.11691	-1.99172	-2.5422	-1.82135	-2.12195	-1.66957	-1.49665	-1.91642	-1.2897	-3.78695	-4.00461	-1.88395	-1.47118	-1.57103	-6.32703	-6.59292	-6.65429	-6.70618	-6.87165	-6.79978	-6.70828	-6.68977	-7.03352	-6.72147	-6.86671	-6.84256	-6.57236	-6.46014	-6.9153	-6.86254	-6.7964	-6.81535	-5.78034	-5.40029	-4.75225	-6.50104	-6.72125	-3.45636
C00007411:"1,6-Anhydroglucose"|		LC	-0.342257	-0.588976	-0.609077	-0.610575	-0.233642	-0.370126	-0.663477	-0.453866	-0.498131	-0.628515	-0.418706	-0.548975	-0.370929	-0.63182	-0.589659	-0.453918	-0.619562	-0.311331	-0.627311	-0.614167	-0.54978	-0.522485	-0.6447	-0.158556	-0.478755	-0.531587	-0.530614	-0.63309	-0.533769	-0.611251	-0.603627	-0.821679	-0.720845	-0.603516	-0.569357	-0.490899	-0.358588	-0.693221	-0.629847	-0.548955	-0.616304	-0.552908	-0.552872	-0.565259	-0.351641	-0.645831	-0.503434
C00007476:5-(Methylthio)-2-oxo-pentanoic acid|	C17211	LC	1.65544	1.80174	1.62145	1.48082	1.76782	1.69751	1.44172	1.67791	1.63361	1.83632	1.66104	1.68154	1.553	1.47325	1.57687	1.53132	1.30177	1.6782	1.21624	1.26996	1.40721	1.49065	1.29312	1.96849	2.05397	1.93013	1.75212	2.00566	1.90853	1.61001	1.67984	1.55977	1.7061	1.58479	1.69911	1.46449	1.31012	1.28391	1.43358	1.41648	1.33224	1.73996	1.75061	1.484	1.74341	1.59356	1.86397
C00007393:L-2-Aminoadipate|	C00956	LC	-5.6429	-5.32804	-5.80195	-5.66378	-5.77594	-5.62404	-5.84678	-5.69251	-5.79111	-5.54695	-5.7067	-5.38406	-5.52278	-5.4667	-4.97629	-5.22686	-5.27814	-4.69826	-5.08037	-4.79471	-5.33478	-5.17552	-4.60871	-4.83871	-4.43396	-4.43206	-5.00574	-4.3002	-4.49994	-4.69166	-4.29547	-4.21181	-4.2412	-4.20671	-4.24595	-5.42726	-5.27743	-4.50644	-4.77513	-4.76072	-4.65483	-5.46912	-5.31003	-4.78109	-5.8168	-5.61382	-4.98483
C00007511:Caffeic aldehyde|C00000751:Phenylpyruvic acid|C00000152:p-Coumaric acid|	C00166	LC	-1.79778	-1.86754	-1.96656	-1.88721	-1.7318	-1.74982	-1.84296	-1.71001	-1.74961	-1.89321	-1.79376	-1.80757	-1.88488	-2.01073	-1.95485	-1.868	-1.92185	-1.64907	-1.98792	-1.90651	-1.97498	-1.94961	-2.03514	-1.68907	-1.83036	-1.75892	-2.03794	-1.95715	-1.87645	-2.0885	-2.07613	-2.32653	-2.14388	-2.20543	-2.17624	-2.26445	-2.53176	-2.37537	-2.27924	-2.29809	-2.44768	-2.02159	-1.98983	-2.06412	-1.92928	-2.10033	-1.9224
C00007285:Glyceraldehyde 3-phosphate|C00007564:D-Glyceraldehyde 3-phosphate|	C00118|C00661|C16670	LC	-4.90651	-4.78621	-5.41095	-5.81434	-5.37693	-5.40897	-5.84678	-5.69251	-5.18316	-5.14151	-5.7067	-4.76641	-4.46052	-4.82968	-5.15019	-5.38186	-4.58882	-4.8402	-4.91263	-5.29216	-4.39446	-4.77772	-4.58326	-4.89222	-5.43293	-5.05176	-4.98354	-5.81769	-5.05925	-4.61511	-4.89481	-5.75084	-5.14646	-5.74221	-5.78107	-5.31121	-5.13818	-5.07648	-5.65401	-4.74354	-5.0611	-4.85742	-5.22393	-5.05419	-5.51327	-5.8672	-5.0929
C00002682:Vanillic acid|C00007309:Homogentisate|	C06672	LC	-5.6429	-5.55208	-5.80195	-5.81434	-5.77594	-5.62404	-5.84678	-5.69251	-5.79111	-5.6958	-5.7067	-5.66145	-5.6837	-5.70793	-5.55146	-5.63876	-5.56134	-5.56433	-5.66148	-5.6697	-5.57669	-5.60539	-5.45436	-5.76471	-5.81426	-5.7108	-5.79317	-5.81769	-5.85183	-5.67547	-5.75606	-5.75084	-5.74027	-5.74221	-5.78107	-5.7682	-5.85362	-5.7647	-5.80229	-5.78454	-5.77935	-5.75142	-5.77051	-5.75782	-5.8168	-5.63331	-5.67904
C00007381:Quinolinic acid|	C03722	LC	-5.6429	-5.55208	-5.80195	-5.81434	-5.77594	-5.62404	-5.84678	-5.69251	-5.79111	-5.6958	-5.7067	-5.66145	-5.6837	-5.70793	-5.55146	-5.63876	-5.56134	-5.56433	-5.66148	-5.6697	-5.57669	-5.60539	-5.45436	-5.76471	-5.81426	-5.7108	-5.79317	-5.81769	-5.85183	-5.67547	-5.75606	-5.75084	-5.74027	-5.74221	-5.78107	-5.7682	-5.85362	-5.7647	-5.80229	-5.78454	-5.77935	-5.79406	-5.77051	-5.75782	-5.8168	-5.8672	-5.67904
C00007380:L-Dehydroascorbate|C00001177:cis-Aconitic acid|	C00417|C02341	LC	-3.1924	-2.66906	-2.97485	-5.81434	-3.77568	-2.91839	-3.31381	-5.69251	-3.08016	-2.89703	-3.44798	-5.66145	-3.04785	-3.09045	-2.63947	-3.0469	-2.84644	-2.84973	-3.36776	-3.03482	-2.91824	-2.51953	-2.75285	-3.40096	-5.81426	-3.16805	-3.45379	-3.09147	-3.33155	-3.03899	-3.4662	-3.05423	-3.46334	-3.07489	-3.49391	-3.21574	-3.43589	-5.7647	-5.80229	-3.14577	-3.22261	-2.85828	-2.9732	-3.24386	-3.43765	-3.46189	-3.02581
C00007579:Indole 3-carboxylic acid methyl ester|C00007578:4-Methoxyindole-3-carbaldehyde|C00007577:1-Methoxyindole-3-carbaldehyde|		LC	-5.6429	-5.55208	-5.80195	-5.67684	-5.77594	-5.62404	-5.84678	-5.57348	-5.79111	-5.6958	-5.7067	-5.66145	-5.6837	-5.70217	-5.39912	-5.63876	-5.56134	-4.94813	-5.23281	-4.69692	-4.96887	-5.60539	-4.60156	-5.76471	-5.81426	-5.7108	-5.79317	-5.81769	-5.55119	-5.3106	-5.39317	-5.29242	-5.47449	-5.72517	-5.78107	-5.44762	-5.85362	-5.38912	-5.49195	-5.61266	-4.92569	-5.69399	-5.75616	-4.94881	-5.56342	-5.71962	-5.18361
C00001203:Shikimic acid|	C00493	LC	-3.56499	-3.4568	-3.7406	-3.86806	-3.71015	-3.65138	-3.64655	-3.49026	-3.38566	-3.58408	-3.67697	-3.50374	-3.85128	-3.67644	-3.44386	-3.52848	-3.58741	-3.41784	-3.55063	-3.5947	-3.51491	-3.75087	-3.51136	-3.74454	-3.73981	-3.4707	-3.71472	-3.45818	-3.96863	-3.57719	-3.59063	-3.68596	-3.49509	-3.80562	-3.80835	-3.45834	-3.93405	-3.74037	-3.52285	-3.73831	-3.83075	-3.53337	-3.48396	-3.58633	-3.80688	-3.62609	-3.45563
C00007648:2-Oxo-6-methylthiohexanoic acid|C00007470:Allantoic acid|	C00499	LC	-5.6429	-5.55208	-5.80195	-5.81434	-5.77594	-5.62404	-5.84678	-5.69251	-5.79111	-5.6958	-5.7067	-5.66145	-5.6837	-5.70793	-5.55146	-5.63876	-5.56134	-5.56433	-5.66148	-5.6697	-5.57669	-5.60539	-5.45436	-5.76471	-5.81426	-5.7108	-5.79317	-5.81769	-5.85183	-5.67547	-5.75606	-5.75084	-5.74027	-5.74221	-5.78107	-5.7682	-5.85152	-5.7647	-5.80229	-5.78454	-5.77935	-5.79406	-5.77051	-5.75782	-5.8168	-5.8672	-5.67904
C00007265:N-Carbamoyl-L-aspartate|C00007648:2-Oxo-6-methylthiohexanoic acid|C00007470:Allantoic acid|	C00438	LC	-0.836019	-0.712384	-0.998059	-0.80737	-0.621296	-0.718531	-0.731582	-0.573786	-0.824806	-0.672699	-0.490632	-0.454578	-0.371456	-0.385744	-0.34344	-0.210232	-0.294895	0.00295014	-0.299951	-0.404722	-0.127034	-0.226547	-0.100641	-0.601135	-0.664322	-0.423766	-1.00852	-0.73066	-0.926608	-0.952018	-0.873475	-1.3091	-1.14904	-1.17876	-1.09494	-0.902386	-1.50311	-1.31929	-1.23545	-1.37601	-1.62422	-0.022052	0.139458	-0.244338	-0.0277141	-6.72125	0.117825
C00001201:Quinic acid|	C00296	LC	1.85926	2.03853	1.73213	1.5863	1.7123	1.87252	1.71771	1.97225	1.92973	1.90473	1.78521	1.81042	1.85027	1.97887	1.9524	1.9985	1.96592	2.11618	1.91685	1.92368	1.98089	1.89433	2.04834	1.80671	1.94196	1.94952	1.84129	1.87502	1.78098	1.92514	1.93589	1.72001	2.00126	1.7634	1.75609	1.97807	1.74031	1.8118	1.88641	1.82378	1.88655	1.92577	1.96926	1.84383	1.85482	1.82256	2.14299
C00034325:(E)-Ferulic acid|C00002743:Ferulic acid|C00007611:5-Hydroxyconiferyl aldehyde|	C01494	LC	-5.6429	-5.55208	-5.80195	-5.81434	-5.77594	-5.62404	-5.84678	-5.69251	-5.79111	-5.6958	-5.7067	-5.66145	-5.6837	-5.70793	-5.55146	-5.63876	-5.4385	-5.56433	-4.54927	-4.47672	-5.57669	-5.60539	-3.9089	-5.76471	-5.81426	-4.14855	-4.59665	-5.81769	-4.23905	-3.3795	-4.14422	-3.48865	-3.16889	-3.20019	-3.44557	-3.12161	-3.36538	-2.85378	-3.25731	-3.16621	-3.07298	-5.79406	-4.31011	-5.75782	-4.73104	-4.59504	-5.67904
C00007337:5-Hydroxyconiferyl alcohol|	C12205	LC	-4.51819	-3.66532	-4.2798	-4.511	-4.48255	-4.03269	-3.70436	-3.61862	-3.63931	-3.71688	-3.55987	-3.33378	-5.6837	-5.70793	-5.55146	-5.63876	-5.56134	-5.56433	-5.66148	-5.6697	-5.57669	-5.60539	-5.45436	-5.76471	-5.81426	-5.45307	-5.79317	-5.81769	-5.50928	-5.67547	-5.75606	-5.75084	-5.74027	-5.74221	-5.78107	-5.7682	-5.85362	-5.7647	-5.80229	-5.78454	-5.77935	-5.79406	-5.77051	-5.75782	-5.8168	-5.8672	-5.67904
C00007372:Magnesium protoporphyrin monomethyl ester|	C04536	LC	-5.60306	-5.55208	-5.80195	-5.81434	-5.77594	-5.62404	-5.84678	-5.69251	-5.79111	-5.6958	-5.7067	-5.66145	-5.6837	-5.70793	-5.46594	-5.43471	-5.56134	-5.56433	-5.66148	-5.24539	-5.57669	-5.60539	-5.27549	-5.76471	-5.81426	-5.7108	-5.79317	-5.81769	-5.85183	-5.67547	-5.75606	-5.75084	-5.74027	-5.74221	-5.78107	-5.7682	-5.85362	-5.7647	-5.80229	-5.78454	-5.77935	-5.79406	-5.77051	-5.75782	-5.8168	-5.8672	-5.67879
C00005432:"Quercetin 3,7-di-O-alpha-L-rhamnopyranoside"|C00005178:Kaempferol 3-galactoside-7-rhamnoside|		LC	1.79647	2.18399	1.96445	1.67998	1.67732	1.92307	1.34021	1.75598	1.38514	1.70875	1.70433	1.69992	2.08441	1.9635	2.17903	2.20104	2.24333	2.37441	2.19019	2.30288	2.22844	2.28771	2.45448	2.03545	2.21957	2.34296	2.07922	2.12519	2.13508	1.80701	1.6473	1.6788	2.02141	1.75889	1.70311	1.20112	0.855856	1.42938	1.12029	0.601286	1.13087	1.35811	1.51644	1.74982	1.26969	1.20431	1.84126
C00007604:L-Kynurenine|	C00328	LC	-5.6429	-5.55208	-5.80195	-5.81434	-5.77594	-5.62404	-5.84678	-5.69251	-5.79111	-5.6958	-5.7067	-5.66145	-5.6837	-5.70793	-5.54275	-5.63876	-5.08945	-5.51171	-5.63069	-5.64537	-5.12462	-5.47349	-4.79809	-5.76471	-5.81426	-5.7108	-5.79317	-5.81769	-5.85183	-5.67547	-5.75606	-5.75084	-5.74027	-5.74221	-5.78107	-5.7682	-5.85362	-5.7647	-5.80229	-5.78454	-5.77935	-5.79406	-5.75753	-5.75782	-5.8168	-5.8672	-5.67904
C00007647:2-(2'-Methylthio)ethylmalic acid|	C17210	LC	-5.6429	-5.55208	-5.80195	-5.78295	-5.77594	-5.62404	-5.84678	-5.69251	-5.79111	-5.6958	-5.7067	-5.66145	-5.35871	-5.27283	-5.23343	-5.31312	-5.38247	-4.74955	-5.55909	-5.14965	-5.04985	-5.03201	-5.12392	-5.741	-5.81426	-5.7108	-5.79317	-5.81769	-5.85183	-5.67547	-5.75606	-5.75084	-5.74027	-5.74221	-5.78107	-5.7682	-5.85362	-5.7647	-5.80229	-5.78454	-5.77935	-5.52512	-5.46717	-5.48786	-5.67694	-5.70664	-5.16303
C00007397:3-Indolylmethylthiohydroximate|		LC	-3.22299	-3.1276	-3.2911	-3.32952	-3.10882	-3.03962	-2.94169	-2.71455	-2.98134	-2.89077	-2.81004	-2.86864	-2.58765	-2.69194	-2.4962	-2.66326	-2.50354	-2.53914	-2.74138	-2.64613	-2.4518	-2.45344	-2.16432	-3.20698	-3.3662	-3.25681	-3.64419	-3.84513	-3.36839	-4.45021	-4.65858	-5.30036	-4.7223	-4.9381	-4.82791	-5.12545	-5.5876	-4.945	-5.03285	-5.79546	-5.61554	-3.76506	-3.63279	-3.13951	-4.3622	-3.75778	-3.0028
C00002778:Sinapyl alcohol|	C02325	LC	-5.6429	-5.55208	-5.80195	-5.81434	-5.77594	-5.62404	-5.84678	-5.69251	-5.79111	-5.6958	-5.7067	-5.66145	-5.55896	-5.70793	-5.55146	-5.63876	-5.37312	-5.56433	-5.41538	-5.4084	-5.50546	-5.60539	-5.45436	-5.76471	-5.81426	-5.7108	-5.79317	-5.81769	-5.85183	-5.67547	-5.75606	-5.75084	-5.74027	-5.74221	-5.78107	-5.7682	-5.85362	-5.7647	-5.80229	-5.78454	-5.77935	-5.79406	-5.77051	-5.46048	-5.8168	-5.8672	-5.67904
C00005428:Quercetin 3-O-beta-D-glucopyranosyl-7-O-alpha-L-rhamnopyranoside|C00005413:Rutin|	C05625|D00190	LC	1.50099	1.71276	1.82794	1.51391	1.47531	1.51937	1.83727	2.1281	1.84754	2.02352	1.76983	1.96435	1.75849	1.81254	1.75492	1.88004	2.10473	2.03394	2.2892	2.35223	2.04222	1.81739	2.04635	2.03688	2.05154	2.14449	1.90479	1.89756	2.06811	1.69229	1.68623	1.64189	1.85814	1.73632	1.49028	1.55958	1.77186	1.78742	1.44382	1.31577	2.03349	1.49916	1.69938	1.8267	1.47927	1.50391	1.93217
C00000575:Bergaptan|C00007297:2-C-Methyl-D-erythritol 4-phosphate|	C11434	LC	-5.6429	-5.55208	-5.80195	-5.81434	-5.77594	-5.62404	-5.84678	-5.69251	-5.79111	-5.4046	-5.7067	-5.66145	-5.6837	-5.70793	-5.55146	-5.63876	-5.56134	-5.56433	-5.66148	-5.6697	-5.57669	-5.60539	-5.45436	-5.76471	-5.68037	-5.7108	-5.79317	-5.81769	-5.85183	-5.67547	-5.75606	-5.75084	-5.74027	-5.74221	-5.78107	-5.7682	-5.85362	-5.7647	-5.80229	-5.78454	-5.77935	-5.79406	-5.77051	-5.75782	-5.8168	-5.8672	-5.67904
C00036838:Brassitin|		LC	-5.6429	-5.55208	-5.4036	-5.79695	-5.77594	-5.62404	-5.65269	-5.20613	-5.25451	-5.42876	-5.04188	-5.15556	-5.6837	-5.70793	-5.55146	-5.63876	-5.56134	-5.56433	-5.66148	-5.6697	-5.57669	-5.60539	-5.45436	-5.76471	-5.81426	-5.7108	-5.79317	-5.81769	-5.85183	-5.67547	-5.75606	-5.75084	-5.74027	-5.74221	-5.78107	-5.7682	-5.85362	-5.7647	-5.80229	-5.78454	-5.77935	-5.79406	-5.77051	-5.75782	-5.8168	-5.8672	-5.67904
C00001550:Pantothenic acid|	C12276|C00864	LC	-1.39245	-1.22794	-1.61772	-1.41369	-1.56463	-1.40274	-1.75519	-1.38916	-1.7693	-1.34715	-1.4603	-1.25127	-1.04011	-1.16699	-0.881446	-1.10771	-0.846464	-0.780114	-1.40133	-1.57614	-1.30556	-1.14636	-1.3341	-1.64597	-1.45343	-1.41099	-1.61054	-1.4898	-1.50257	-1.40529	-1.69922	-1.86004	-1.75734	-1.98753	-1.81117	-1.90229	-2.37406	-2.20811	-1.96538	-2.24971	-2.11194	-1.94556	-1.92016	-1.74176	-1.95879	-2.17721	-1.39788
C00007498:L-Cystathionine|	C02291|C00542	LC	-5.6429	-5.42959	-5.80195	-5.66564	-5.77594	-5.5786	-5.44842	-5.01046	-5.54258	-5.08416	-5.20081	-5.14197	-4.7478	-4.84399	-4.60885	-4.51558	-4.44897	-4.6485	-4.17628	-4.28123	-4.4899	-4.59263	-4.23846	-4.86322	-5.21896	-5.19838	-5.56887	-5.25991	-5.5241	-5.67547	-5.58793	-5.75084	-5.74027	-5.2459	-5.62677	-5.7682	-5.85362	-5.7647	-5.80229	-5.78454	-5.77935	-5.34321	-4.98643	-4.58005	-5.45711	-5.27265	-5.09408
C00007646:2-(3'-Methylthio)propylmalic acid|	C17214	LC	-2.63163	-2.6281	-2.77381	-2.82393	-2.46701	-2.59198	-2.92518	-2.74619	-2.76712	-2.77377	-2.72801	-2.87624	-2.6954	-2.87885	-2.71666	-2.65353	-2.93194	-2.53517	-2.99341	-2.71392	-2.78417	-2.72519	-2.77946	-2.48982	-2.72319	-2.84154	-2.84587	-2.74075	-2.73218	-2.8768	-2.86214	-3.0216	-2.89653	-2.84474	-2.87558	-2.6856	-2.51112	-2.84204	-2.83965	-2.73429	-2.83995	-2.78801	-2.76222	-2.77189	-2.68117	-2.86649	-2.74538
C00007339:Porphobilinogen|	C00931	LC	-4.32444	-3.90071	-4.08785	-4.02574	-4.07416	-3.94414	-4.24582	-4.17736	-4.6522	-4.29979	-4.42877	-4.23346	-3.74937	-3.85114	-3.70317	-3.76821	-3.69482	-3.7694	-3.76037	-3.82731	-3.64236	-3.80056	-3.41057	-4.65368	-4.38892	-4.27963	-4.70503	-4.49346	-4.57087	-4.72538	-4.59323	-4.9125	-4.79028	-4.58263	-4.82168	-4.84372	-5.25525	-4.6083	-4.56595	-5.13745	-5.07625	-4.38119	-4.04509	-4.14621	-4.1995	-4.04296	-3.60382
C00000733:Chorismic acid|	C00251	LC	-5.6429	-5.55208	-5.80195	-5.81434	-5.51531	-5.62404	-5.84678	-5.69251	-5.79111	-5.6958	-5.7067	-5.66145	-5.41347	-5.64705	-5.42719	-5.20055	-5.43173	-5.2332	-5.32179	-5.65109	-5.29306	-5.01761	-5.23773	-5.76471	-5.81426	-5.7108	-5.79317	-5.81769	-5.85183	-5.67547	-5.75606	-5.75084	-5.74027	-5.74221	-5.78107	-5.7682	-5.85362	-5.7647	-5.80229	-5.78454	-5.77935	-5.79406	-5.77051	-5.75782	-5.8168	-5.8672	-5.67904
C00034327:(E)-Sinapic acid|C00002776:Sinapic acid|	C00482	LC	-5.6429	-5.55208	-5.36173	-5.13802	-5.77594	-5.62404	-4.05743	-4.35729	-4.40192	-4.2239	-4.37383	-4.46108	-5.6837	-5.70793	-5.55146	-5.63876	-5.56134	-5.56433	-5.66148	-5.6697	-5.57669	-5.60539	-5.45436	-5.72708	-5.81426	-4.858	-5.79317	-5.81769	-5.39345	-5.67547	-5.75606	-5.75084	-5.74027	-5.74221	-5.78107	-5.7682	-5.85362	-5.7647	-5.80229	-5.78454	-5.77935	-5.43795	-5.77051	-5.75782	-5.8168	-5.25299	-4.94836
C00007304:Mevalonate 5-phosphate|	C01107	LC	-5.6429	-5.55208	-5.80195	-5.81434	-5.77594	-5.62404	-5.84678	-5.69251	-5.79111	-5.6958	-5.7067	-5.66145	-5.6837	-5.70793	-5.55146	-5.63876	-5.56134	-5.56433	-5.66148	-5.6697	-5.57669	-5.60539	-5.45436	-4.85095	-4.41437	-4.39611	-4.78819	-4.43082	-4.64925	-5.67547	-5.75606	-5.75084	-5.74027	-5.74221	-5.78107	-5.7682	-5.85362	-5.7647	-5.80229	-5.78454	-5.77935	-5.09566	-5.77051	-5.75782	-5.38171	-5.8672	-5.10131
C00007644:2-(4'-Methylthio)butylmalic acid|	C17218	LC	-5.6429	-5.55208	-5.80195	-5.81434	-5.77594	-5.62404	-5.84678	-5.69251	-5.79111	-5.6958	-5.7067	-5.66145	-5.6837	-5.70793	-5.55146	-5.63876	-5.56134	-5.56433	-5.66148	-5.6697	-5.57669	-5.60539	-5.45436	-5.76471	-5.81426	-5.7108	-5.79317	-5.81769	-5.85183	-5.67547	-5.75606	-5.75084	-5.74027	-5.74221	-5.78107	-5.7682	-5.85362	-5.44911	-5.80229	-5.62104	-5.77935	-5.79406	-5.77051	-5.75782	-5.8168	-5.8672	-5.67904
C00007582:"2-(Indole-3-yl)-4,5-dihydro-1,3-thiazole-4-carboxylic acid"|		LC	-4.11039	-3.23559	-4.55134	-4.66183	-4.42766	-4.15833	-2.96874	-3.32525	-3.08439	-2.92643	-3.55808	-3.40438	-2.92229	-2.65427	-2.45199	-2.7322	-2.82511	-2.44065	-3.15932	-3.25427	-3.00219	-3.0561	-2.96075	-2.28216	-2.39569	-1.90199	-2.52666	-2.47551	-2.88005	-3.3762	-2.69107	-3.86176	-3.21945	-3.59124	-3.27319	-5.28375	-4.76361	-3.76182	-3.58525	-5.7169	-5.43225	-2.32642	-2.60865	-3.71094	-2.36997	-2.61152	-2.18044
C00007507:L-gamma-Glutamyl-L-cysteine|	C00669	LC	-5.6429	-5.55208	-5.80195	-5.81434	-5.77594	-5.62404	-5.84678	-5.6387	-5.74832	-5.6958	-5.7067	-5.66145	-4.12233	-4.62117	-4.04455	-3.89825	-3.17247	-3.34474	-4.23084	-4.12741	-4.00913	-3.62231	-3.59576	-4.64968	-4.88638	-5.10673	-4.63473	-4.87581	-5.26303	-5.67547	-5.32751	-5.75084	-5.74027	-5.74221	-5.78107	-5.7682	-5.85362	-5.7647	-5.80229	-5.78454	-5.77935	-4.27038	-4.26361	-4.18732	-4.81056	-4.71794	-3.72299
C00007449:4-Thiazolidinecarboxylic acid|		LC	-5.6429	-5.55208	-5.80195	-5.81434	-5.77594	-5.62404	-5.35929	-5.69251	-5.63536	-5.6958	-5.7067	-5.27409	-5.6837	-5.70793	-5.55146	-5.63876	-5.56134	-5.56433	-5.66148	-5.6697	-5.57669	-5.60539	-5.45436	-5.76471	-5.81426	-5.7108	-5.79317	-5.81769	-5.85183	-5.67547	-5.75606	-5.75084	-5.74027	-5.74221	-5.78107	-5.7682	-5.85362	-5.7647	-5.80229	-5.78454	-5.77935	-5.79406	-5.77051	-5.75782	-5.8168	-5.8672	-5.67904
C00007642:2-(5'-methylthio)pentylmalic acid|	C17222	LC	-5.6429	-5.55208	-5.64244	-5.54011	-5.77594	-5.62404	-5.84678	-5.69251	-5.79111	-5.6958	-5.7067	-5.66145	-4.92628	-5.17456	-4.50438	-5.63876	-5.56134	-4.16136	-5.66148	-5.6697	-4.84285	-5.60539	-5.45436	-5.76471	-5.81426	-5.7108	-5.79317	-5.81769	-5.85183	-5.67547	-5.75606	-5.75084	-5.74027	-5.74221	-5.78107	-5.7682	-5.85362	-5.7647	-5.80229	-5.78454	-5.77935	-5.79406	-5.37867	-5.75782	-5.8168	-5.75774	-5.67904
C00007391:alpha-D-Galactose 1-phosphate|C00007482:alpha-D-Glucose 1-phosphate|C00007389:D-Mannose 1-phosphate|C00007305:D-Fructose 6-phosphate|C00007307:D-Mannose 6-phosphate|C00007483:D-myo-Inositol 1-phosphate|C00007306:D-Glucose 6-phosphate|	C00446|C03384	LC	-3.895	-3.54353	-4.33192	-4.06459	-4.14291	-4.21467	-4.94521	-3.88678	-4.05083	-3.58057	-4.07262	-4.10659	-4.13088	-5.3101	-4.03271	-4.20432	-4.05407	-3.68162	-4.449	-4.23033	-4.40255	-5.13865	-3.72702	-3.66434	-3.9745	-4.16396	-3.91401	-3.18641	-4.32457	-3.94944	-3.78723	-3.34166	-4.3325	-4.23092	-4.38562	-3.86395	-3.57211	-3.34246	-3.21687	-3.70082	-3.76893	-3.54047	-3.50124	-4.22335	-3.80327	-3.83173	-3.72985
C00007235:Leucocyanidin|	C05906	LC	-4.77823	-5.46889	-4.66881	-4.52683	-4.13944	-4.12365	-4.63281	-4.02727	-4.29539	-5.47575	-4.66256	-4.4243	-4.53268	-4.49067	-6.81989	-4.08912	-4.78224	-4.20686	-5.47592	-4.55044	-5.47972	-5.02088	-5.58184	-5.05732	-4.12252	-4.05922	-4.83785	-5.62798	-4.45584	-4.68147	-4.88619	-7.03352	-4.51614	-4.72875	-4.35332	-3.68903	-3.73334	-5.21053	-5.48053	-4.73835	-5.28129	-5.33974	-5.54652	-5.09449	-5.21017	-4.79966	-4.3791
C00007311:UMP|	C00105	LC	-5.6429	-5.55208	-5.80195	-5.81434	-5.77594	-5.62404	-5.84678	-5.20451	-5.79111	-5.6958	-5.7067	-5.66145	-5.6837	-5.70793	-5.55146	-5.63876	-5.56134	-5.56433	-5.66148	-5.6697	-5.57669	-5.60539	-5.45436	-5.76471	-4.77078	-5.7108	-5.79317	-4.64183	-5.85183	-5.67547	-5.39285	-5.75084	-5.74027	-5.74221	-5.15829	-4.19653	-5.85362	-5.7647	-4.85095	-5.78454	-5.77935	-5.79406	-5.77051	-4.59953	-5.4079	-4.54486	-5.67904
C00007627:5-Enolpyruvyl-shikimate 3-phosphate|C00007311:UMP|	C00105	LC	-5.6429	-5.55208	-5.80195	-5.81434	-5.77594	-5.52147	-5.84678	-5.1612	-5.5334	-5.6958	-5.7067	-5.66145	-5.6837	-5.70793	-5.55146	-5.63876	-5.56134	-5.56433	-5.66148	-5.6697	-5.57669	-5.60539	-5.45436	-5.76471	-5.81426	-5.7108	-5.79317	-5.81769	-5.85183	-5.67547	-5.75606	-5.75084	-5.74027	-5.74221	-5.78107	-5.7682	-5.85362	-5.7647	-4.9113	-5.0098	-5.77935	-5.6691	-5.50601	-5.75782	-5.8168	-5.8672	-5.67904
C00028293:gamma-Tomatine|		LC	-1.49874	-2.02836	-1.94708	-2.03162	-1.63347	-1.77455	-1.69888	-1.79826	-1.80663	-1.81659	-1.51994	-1.70931	-1.54158	-1.7933	-1.8529	-1.77869	-1.87445	-1.66283	-1.80496	-1.93557	-1.73116	-1.78532	-1.88282	-1.28998	-1.57811	-1.82183	-1.58432	-1.8326	-1.79411	-1.63523	-1.69032	-1.96036	-1.90588	-1.76907	-1.80459	-1.70433	-1.60789	-1.83097	-1.86027	-1.82393	-1.89214	-1.94165	-1.89112	-1.94844	-1.55679	-1.81575	-1.80554
C00006673:Cyanidin 3-sambubioside-5-glucoside|	C20493	LC	-0.0628912	0.225793	0.085306	-0.384436	-0.350971	0.0505967	-0.490873	-0.00494714	-0.569425	-0.24719	-0.036897	-0.0531207	-0.137611	-0.0985706	0.046043	-0.148584	-0.01632	0.245425	-0.0331973	-0.0727659	0.00438976	-0.0317132	0.127405	-0.882836	-0.697759	-0.64355	-0.904412	-1.06381	-0.678632	-1.10379	-1.14578	-1.28411	-1.04247	-1.2151	-1.51891	-1.99038	-1.45906	-1.51572	-1.46951	-1.47994	-0.646017	-0.879251	-0.734769	-1.43422	-1.13082	-1.0582	-0.672987
C00007402:Quercetin 3-O-[6''-O-rhamnosyl)glucoside] 7-O-rhamnoside|C00005234:Kaempferol 3-gentiobioside-7-rhamnoside|		LC	-5.6429	-5.55208	-5.80195	-5.81434	-5.77594	-5.62404	-5.84678	-5.69251	-5.79111	-5.6958	-5.7067	-5.66145	-5.57267	-5.32611	-5.55146	-5.51178	-5.3905	-5.45545	-5.16289	-5.38647	-5.17021	-5.20049	-4.48351	-5.41079	-5.76046	-5.7108	-5.79317	-5.60131	-5.85183	-5.67547	-5.69947	-5.75084	-5.74027	-5.74221	-5.78107	-5.7682	-5.85362	-5.7647	-5.80229	-5.78454	-5.77935	-5.7868	-5.62394	-4.97014	-5.49175	-5.83935	-5.44515
C00001142:Melibiose|C00001140:Maltose|C00001162:Galactinol|C00001152:Trehalose|C00001151:Sucrose|	C05402	LC	-1.77041	-1.51821	-1.77408	-1.65703	-1.79123	-1.58484	-1.669	-1.50897	-1.62636	-1.61318	-1.63502	-1.39196	-1.81993	-1.6511	-1.41907	-1.58177	-1.79691	-1.45776	-1.89994	-1.75784	-1.79468	-1.63499	-1.8027	-2.16332	-2.33818	-1.94679	-2.24837	-2.48668	-2.26875	-3.20467	-3.34757	-3.15297	-3.38279	-3.01876	-3.61274	-2.58072	-2.78895	-2.71655	-3.27397	-2.94574	-2.60921	-2.10046	-2.13111	-1.67228	-2.0882	-2.17022	-1.71914
C00002500:Scopolin|	C01527	LC	2.73746	2.95911	2.69814	2.59359	2.65855	2.82693	2.46662	2.74254	2.62334	2.7729	2.59567	2.71464	2.77275	2.84914	2.92885	2.8649	2.86617	2.99841	2.73615	2.78324	2.94546	2.94992	3.04852	2.73473	2.84701	2.9157	2.70807	2.77348	2.78536	2.77117	2.75001	2.5708	2.82498	2.59534	2.6455	2.67789	2.36092	2.51461	2.59757	2.60197	2.60275	2.7987	2.81065	2.72515	2.72175	2.66757	3.08897
C00007448:4'-Phosphopantetheine|	C01134	LC	-5.6429	-5.19005	-5.80195	-5.81434	-5.77594	-5.62404	-5.84678	-5.69251	-5.77676	-5.6958	-5.68977	-5.66145	-5.39822	-5.51604	-4.91257	-5.01958	-5.06769	-4.66715	-4.96247	-4.79313	-4.50992	-4.41527	-4.16397	-5.76471	-5.81426	-5.7108	-5.79317	-5.81769	-5.85183	-5.67547	-5.75606	-5.75084	-5.74027	-5.74221	-5.78107	-5.45553	-5.72632	-5.66626	-5.56502	-5.60882	-5.56493	-5.29623	-5.4315	-5.05896	-5.08909	-5.63276	-4.72135
C00007398:3-Indolylmethyldesulfoglucosinolate|		LC	-3.45159	-3.37595	-3.82309	-3.99687	-4.05021	-3.80683	-3.98074	-3.65887	-3.96271	-3.37818	-3.53549	-3.52516	-2.36925	-2.16269	-2.09695	-2.39768	-2.07798	-2.03976	-2.57587	-2.87753	-2.01916	-1.92222	-2.01223	-2.39981	-2.81157	-2.75631	-2.57746	-3.04652	-2.73422	-2.98581	-2.93693	-2.99785	-3.13176	-3.0029	-2.98628	-3.88748	-4.67327	-3.45081	-4.18217	-4.26745	-4.75787	-2.30763	-2.18353	-2.25018	-2.5528	-2.21451	-2.12142
C00013592:1-O-Sinapoyl-beta-D-glucose|	C01175|C03915	LC	-3.10951	-2.45776	-2.91667	-2.6677	-2.69194	-2.84929	-1.67376	-1.84688	-1.9616	-1.80362	-1.63557	-1.51194	-3.25572	-3.25884	-3.2572	-3.02366	-2.99778	-2.89332	-2.63948	-2.60024	-2.77401	-2.76761	-2.5045	-3.14394	-3.41591	-3.02074	-3.38277	-3.19907	-3.26994	-3.99092	-3.87731	-4.71996	-3.67513	-3.41971	-3.64986	-3.50496	-4.52816	-3.1544	-3.94353	-3.58575	-3.7982	-3.07123	-2.87343	-2.2028	-3.04635	-3.01061	-2.49826
C00007342:4-Hydroxybutylglucosinolate|		LC	-5.6429	-5.55208	-5.80195	-5.81434	-5.77594	-5.62404	-5.84678	-5.69251	-5.79111	-5.6958	-5.7067	-5.66145	-5.6837	-5.70793	-5.55146	-5.63876	-5.56134	-5.56433	-5.66148	-5.6697	-5.57669	-5.60539	-5.45436	-5.76471	-5.81426	-5.7108	-5.79317	-5.81769	-5.85183	-5.67547	-5.75606	-5.75084	-5.74027	-5.74221	-5.78107	-5.7682	-5.66326	-5.7647	-5.80229	-5.78454	-5.71171	-5.79406	-5.77051	-5.75782	-5.8168	-5.8672	-5.67904
C00006900:Petanin|	C16295	LC	-1.92732	-1.66154	-1.81216	-1.91938	-1.86706	-1.77187	-1.85605	-1.57422	-1.89267	-1.67751	-1.86521	-1.93617	-0.699122	-0.83382	-0.649084	-0.678729	-0.653487	-0.861851	-0.677386	-0.539713	-0.380541	-0.683887	-0.33473	-1.76732	-1.87331	-1.58958	-2.03629	-2.068	-1.94436	-2.78836	-2.82968	-3.55991	-2.9761	-3.08505	-3.17758	-3.44747	-4.55855	-4.0948	-3.74019	-4.52959	-4.37772	-1.93111	-1.56024	-1.41319	-1.85272	-1.81528	-1.28417
C00006868:Peonidin 3-[6-(3-glucosylcaffeyl)glucoside]-5-glucoside|C00007656:Cyanidin 3-O-[2''-O-(2'''-O-(sinapoyl) xylosyl) glucoside] 5-O-glucoside|		LC	-2.86727	-2.7555	-2.87479	-2.71153	-2.69086	-2.89069	-2.34602	-2.12811	-2.33082	-2.17044	-2.54649	-2.58469	-1.81451	-1.74414	-1.61099	-1.55656	-1.7847	-1.77537	-1.36352	-1.40824	-1.24453	-1.61973	-1.25916	-2.59652	-2.74304	-2.46373	-2.77377	-2.99365	-2.82249	-3.81167	-3.46837	-4.18954	-3.72069	-3.71506	-3.84737	-4.09402	-4.87677	-4.24957	-4.29993	-4.93975	-4.61341	-2.5434	-2.18525	-2.09138	-2.4868	-2.48517	-2.0984
C00007341:2-Methylsulfinylethyl glucosinolate|		LC	-5.6429	-5.55208	-5.80195	-5.81434	-5.77594	-5.62404	-5.84678	-5.69251	-5.79111	-5.6958	-5.7067	-5.66145	-5.6837	-5.70793	-5.55146	-5.63876	-5.56134	-5.56433	-5.66148	-5.6697	-5.57669	-5.60539	-5.45436	-5.76471	-5.81426	-5.7108	-5.79317	-5.69867	-5.85183	-5.67547	-5.75606	-5.75084	-5.74027	-5.74221	-5.78107	-5.7682	-5.85362	-5.7647	-5.80229	-5.78454	-5.77935	-5.79406	-5.77051	-5.75782	-5.8168	-5.8672	-5.67904
C00025533:Soladulcidine|Toma65:Tomatidine isomer|C00002267:Tomatidine|Toma64:Tomatidine|	C10826	LC	2.63812	2.62442	2.49049	2.467	2.76277	2.62521	2.29585	2.48367	2.45751	2.51002	2.53842	2.41334	2.58245	2.35471	2.5051	2.52502	2.31302	2.67399	2.31898	2.3314	2.42199	2.52251	2.36186	2.71749	2.50293	2.43797	2.36187	2.51523	2.50819	2.36716	2.38176	2.3154	2.33255	2.45582	2.4849	2.50196	2.63294	2.43745	2.43789	2.50288	2.46569	2.4983	2.47906	2.35534	2.52419	2.34103	2.49965
C00001428:Putrescine|	C02896|C00134|C03687	LC	-5.29452	-4.7095	-5.37723	-5.82982	-5.31373	-5.2282	-5.28504	-4.95873	-5.49419	-4.95661	-5.30979	-5.2907	-5.31798	-5.38044	-4.83439	-4.807	-4.86505	-4.76974	-5.03515	-4.96863	-4.97287	-5.12547	-4.94564	-5.36684	-5.47088	-5.41587	-5.65908	-5.06032	-5.75304	-5.61223	-5.88212	-5.57653	-6.18128	-5.96386	-6.05253	-5.33113	-5.75081	-5.21021	-5.20136	-5.69284	-5.55866	-4.78389	-4.84308	-5.18898	-5.07799	-5.40427	-4.7029
C00007445:Adenosine 5'-phosphosulfate|	C00224	LC	-6.46828	-6.75719	-6.67874	-6.841	-6.36197	-6.49155	-6.77074	-6.59781	-6.58369	-6.76985	-6.55063	-6.69018	-6.51584	-6.68474	-6.81989	-6.54101	-6.75419	-6.39879	-6.73771	-6.74137	-6.65993	-6.7759	-6.73923	-6.15876	-5.92856	-5.95155	-6.56606	-6.20233	-6.26316	-6.18162	-6.18251	-6.3006	-5.95595	-6.16231	-5.91596	-6.40333	-6.46014	-6.49738	-6.40768	-6.17553	-6.36739	-6.40556	-6.16897	-6.37877	-6.18143	-6.42671	-5.43581
C00000756:Biotin|	C00120|D00029	LC	-0.61586	-0.460437	-0.669624	-0.627626	-0.435049	-0.498327	-1.0887	-0.959685	-1.2121	-1.10235	-1.01166	-0.964439	-0.358218	-0.447648	-0.280774	-0.413489	-0.398494	-0.263376	-0.723154	-0.675426	-0.437192	-0.506649	-0.470196	-1.05529	-1.11573	-0.944097	-1.41935	-1.1873	-1.24648	-2.39659	-2.45604	-2.82443	-2.57166	-2.80649	-2.58868	-2.95937	-3.75251	-3.16116	-3.16056	-3.54673	-3.7845	-1.47236	-1.2279	-1.47442	-1.56194	-1.38229	-1.0569
C00034452:Benzaldehyde|	C00261	LC	-6.46828	-6.75719	-6.75639	-6.8181	-6.34191	-6.49155	-6.77074	-6.59781	-6.58369	-6.84658	-6.55063	-6.69018	-5.6142	-5.87548	-5.36859	-5.53388	-6.29424	-5.73704	-4.78538	-4.77159	-4.62304	-4.74023	-4.44586	-6.32703	-6.59292	-6.65429	-6.70618	-6.76387	-6.79978	-6.60153	-6.68977	-6.72195	-6.67617	-6.86671	-6.84256	-6.15862	-6.36478	-5.62842	-6.12227	-6.37235	-6.06447	-6.8169	-6.76745	-6.38604	-6.50104	-6.52315	-6.44183
C00001234:(Z)-Palmitoleic acid|	C08362	LC	-6.13526	-5.27314	-6.83773	-6.38884	-5.78407	-6.49155	-5.6174	-5.59873	-6.13968	-6.89482	-5.07802	-5.23424	-5.05707	-6.68474	-6.81989	-6.54101	-5.7246	-5.44434	-5.89953	-6.74137	-6.3047	-6.7759	-6.73923	-4.8188	-6.17006	-6.65429	-5.34094	-5.92294	-5.18771	-4.71675	-5.11772	-5.55192	-5.199	-5.37075	-5.74195	-5.52064	-6.11227	-6.29363	-6.86254	-5.91439	-6.81535	-5.38466	-6.83585	-5.90078	-5.55576	-5.48271	-5.2909
C00007427:6-(2-Methoxybenzylamino)purine|		LC	-6.18954	-6.01389	-6.46287	-6.35826	-6.36197	-6.22611	-6.6456	-6.59781	-6.58369	-6.51187	-6.42892	-6.43259	-5.61078	-6.01129	-5.63696	-6.20987	-5.94712	-6.23941	-5.64557	-5.72317	-5.32613	-5.84372	-6.0249	-6.32703	-6.55932	-6.53873	-6.70618	-6.73415	-6.79978	-6.5734	-6.68977	-6.58146	-6.56052	-6.86671	-6.43113	-5.82876	-6.18782	-6.15253	-6.12898	-6.36344	-6.34187	-6.45818	-6.15058	-6.01646	-6.50104	-6.72125	-5.77305
C00001394:L-Threonine|C00001366:L-Homoserine|	C12317|C05519|C00820|C00188	LC	-6.46828	-6.75719	-6.83773	-6.841	-6.36197	-6.49155	-6.77074	-6.59781	-6.58369	-6.89482	-6.55063	-6.69018	-6.51584	-6.68474	-6.81989	-6.54101	-6.75419	-6.39879	-6.26082	-6.74137	-6.62489	-6.7759	-6.5163	-6.00031	-5.56217	-5.65743	-6.44834	-5.79951	-6.4492	-6.70828	-6.26956	-5.92712	-5.96448	-6.04677	-5.69597	-6.57236	-6.27536	-6.70012	-6.58224	-6.25111	-6.72384	-6.8169	-6.48968	-6.83177	-6.50104	-6.72125	-6.57593
C00002657:4-Hydroxybenzaldehyde|C00000207:Benzoic acid|C00000209:Nicotinamide|	C03096|D02277|C00180|D00038	LC	-4.64933	-4.42039	-4.54513	-4.09606	-3.53877	-3.66727	-4.84625	-4.62893	-4.65065	-4.21344	-4.20665	-4.15377	-4.31168	-4.37491	-5.9827	-6.54101	-4.47482	-4.01654	-3.57826	-3.20284	-4.38431	-3.39894	-6.73923	-5.96361	-5.43502	-5.60387	-6.1739	-5.47989	-6.12934	-5.35552	-6.02483	-5.43162	-4.65504	-4.85773	-5.11682	-6.57236	-4.62702	-3.66775	-3.84641	-4.3793	-3.74566	-5.0066	-4.61616	-4.34347	-5.22961	-5.31868	-4.42688
C00001359:L-Glutamine|C00007477:ketopantoic acid|	C00819|C00064|C00303	LC	-4.22466	-3.77894	-6.83773	-4.28829	-4.36437	-4.35546	-4.55936	-4.31589	-4.46689	-4.08258	-4.18105	-4.37371	-4.79351	-6.68474	-4.80085	-4.29525	-4.87519	-4.68993	-4.59147	-4.49014	-4.75449	-4.50041	-4.65215	-4.15755	-3.62509	-4.06824	-6.70618	-3.52804	-3.89696	-4.20658	-4.15362	-3.73633	-4.06059	-3.85395	-3.70424	-3.79799	-4.03659	-3.92165	-3.87512	-6.7964	-4.04244	-4.31379	-4.41373	-6.83177	-5.01018	-5.07786	-4.80799
C00002248:Demissine|	C10803	LC	-6.46828	-6.49416	-6.83773	-6.841	-6.36197	-6.49155	-6.53879	-6.57126	-6.58369	-6.89482	-6.55063	-6.69018	-6.24339	-6.68474	-6.72778	-6.35947	-6.55548	-6.34683	-6.59037	-6.69799	-6.51458	-6.50089	-6.0892	-5.85224	-5.33252	-5.3234	-5.51704	-5.30801	-5.52975	-4.57576	-4.73916	-4.93263	-4.7486	-4.86678	-4.83326	-4.76065	-5.13312	-4.9994	-4.8822	-5.24584	-4.96206	-5.85027	-6.02305	-6.13577	-6.13228	-6.31254	-5.53398
C00007474:2-Oxo-4-(methylthio)butanoic acid|	C01180	LC	-2.64997	-4.42305	-4.93324	-3.64755	-0.585706	-1.89492	-4.74645	-3.5994	-3.03578	-3.54925	-2.53058	-2.65673	-2.38024	-3.35872	-4.35386	-2.73585	-4.36992	-2.5321	-2.19045	-2.66476	-3.78074	-3.34113	-3.57342	-2.57077	-3.03798	-2.18517	-4.09813	-5.66332	-2.10911	-3.90263	-3.33169	-3.89905	-3.31067	-4.52914	-4.06601	-3.46548	-3.0893	-4.69178	-5.6939	-5.2824	-4.69028	-5.45632	-5.07883	-4.91092	-3.1393	-3.88504	-3.06386
C00007539:3-Ketosphinganine|	C02934	LC	-6.46828	-6.50609	-6.83773	-6.841	-6.36197	-6.49155	-6.77074	-6.22062	-6.58369	-6.72595	-6.55063	-6.69018	-6.51584	-6.68474	-6.81989	-6.54101	-6.75419	-6.39879	-6.73771	-6.74137	-6.65993	-6.7759	-6.73923	-6.32703	-6.52528	-6.1858	-5.74329	-5.10129	-5.85567	-5.52984	-5.23199	-5.61292	-5.11737	-5.36774	-5.97264	-4.93274	-5.74834	-5.24633	-4.56595	-5.12953	-5.00792	-4.93811	-4.79998	-4.98896	-5.67635	-5.30308	-4.67284
C00004631:Quercetin|	C00389	LC	-1.07597	-0.856525	-0.656152	-1.04248	-0.984675	-1.11109	-0.706071	-0.356032	-0.511832	-0.495329	-0.645178	-0.545461	-0.783679	-0.738171	-0.839178	-0.733995	-0.671187	-0.637196	-0.264905	-0.249286	-0.681195	-0.869255	-0.662233	-0.372495	-0.526381	-0.39811	-0.7163	-0.519104	-0.447057	-0.992941	-0.983702	-0.941276	-0.696081	-0.828841	-1.01289	-0.899167	-0.764489	-0.798357	-1.00185	-1.26049	-0.501578	-0.915209	-0.813091	-0.709636	-1.20539	-0.985044	-0.615199
C00007540:Sphinganine|	C00836	LC	-6.46828	-6.75719	-6.83773	-6.841	-6.36197	-6.49155	-6.77074	-6.59781	-6.58369	-6.89482	-6.55063	-6.69018	-6.51584	-6.68474	-6.81989	-6.54101	-6.75419	-6.39879	-6.73771	-6.74137	-6.65993	-6.7759	-6.73923	-6.32703	-6.59292	-6.35339	-6.40636	-6.06487	-6.08278	-5.54119	-5.45773	-5.41795	-5.0345	-4.99598	-6.2128	-4.60378	-6.38571	-4.7573	-4.29952	-4.35279	-4.57571	-4.65299	-4.93009	-5.09153	-6.50104	-5.70247	-4.65646
C00000613:p-Coumaryl alcohol|	C02646	LC	-6.46828	-6.75719	-6.83773	-6.841	-6.36197	-6.49155	-6.77074	-6.59781	-6.58369	-6.89482	-6.55063	-6.69018	-4.01555	-4.42011	-4.36195	-3.7851	-3.81909	-3.33551	-4.32284	-3.68249	-4.33051	-3.77546	-3.49026	-5.26568	-5.49271	-5.9833	-6.28855	-6.06595	-5.73281	-6.70828	-6.67721	-7.03352	-6.72147	-6.70321	-6.84256	-5.07275	-6.39577	-6.03844	-5.91636	-6.49865	-6.61875	-4.27015	-4.49532	-4.20658	-4.48734	-4.44533	-4.0568
C00003047:(R)-linalool|C00000136:"1,8-Cineole"|	C03985|C11388|C11389	LC	-3.76245	-3.57413	-3.73258	-4.19198	-3.862	-3.63752	-4.20367	-3.71774	-3.92918	-3.76267	-4.09675	-4.00374	-3.2556	-3.21363	-3.03234	-3.3671	-3.63056	-3.30762	-3.63438	-3.49808	-3.25162	-3.18717	-3.49757	-4.06292	-4.21714	-4.08119	-4.63458	-4.5011	-4.51158	-4.36141	-4.57899	-4.63028	-4.47098	-4.45391	-4.46847	-4.53845	-4.51898	-4.70279	-4.71546	-4.4574	-4.22514	-3.99586	-3.83947	-5.92211	-4.43976	-4.37694	-4.30006
C00007431:"6,9-Octadecadienedioic acid"|C00000389:"13S-Hydroperoxy-9Z,11E,15Z-octadecatrienoic acid"|		LC	-6.24918	-5.94708	-6.39888	-6.841	-5.91936	-6.49155	-6.23853	-6.59781	-6.58369	-6.03705	-5.97816	-5.85035	-5.98342	-6.29401	-5.8833	-5.68911	-5.7302	-6.18772	-5.56528	-5.29116	-5.39244	-6.04559	-5.39376	-6.32703	-6.40483	-6.64316	-6.70618	-6.47557	-6.56058	-6.5866	-6.68977	-7.03352	-6.72147	-6.86671	-6.84256	-6.57236	-6.46014	-6.62135	-6.86254	-6.7964	-6.81535	-6.8169	-6.83585	-6.31738	-6.50104	-6.72125	-6.45966
C00007543:4-Hydroxysphinganine|		LC	-4.2295	-2.45263	-2.39641	-3.70295	-5.24325	-4.54596	-2.76491	-2.34754	-2.70365	-2.6656	-4.08509	-4.43364	-3.51283	-3.535	-3.94971	-3.86158	-3.02003	-3.48284	-3.644	-3.76731	-4.29843	-4.62534	-3.36341	-2.89376	-2.18595	-1.65844	-1.41171	-1.07375	-1.54158	-1.26521	-1.17738	-1.16939	-0.940772	-1.22836	-1.60076	-0.739923	-1.79851	-1.07749	-0.422042	-0.811556	-0.740404	-0.746673	-0.789757	-0.846452	-1.73571	-1.06072	-0.539522
C00035004:20-Hydroxyeicosanoic acid|		LC	-6.00503	-5.5007	-5.43034	-6.50828	-6.19076	-5.63864	-6.20679	-6.0803	-6.301	-6.31629	-6.55063	-6.27038	-6.51584	-5.91841	-6.81989	-6.54101	-6.35039	-5.96131	-5.88079	-5.61293	-6.48964	-6.23026	-6.07182	-5.58308	-6.27507	-6.07397	-5.2423	-6.23924	-6.11453	-6.70828	-6.46304	-6.50754	-6.69994	-6.86671	-6.84256	-6.57236	-6.37504	-6.9153	-6.86254	-6.7964	-6.81535	-6.8169	-6.83585	-6.7232	-6.50104	-6.72125	-5.24151
C00007509:Pyridoxal|	C00250	LC	-5.30866	-5.74583	-5.4542	-5.52313	-4.97681	-5.2695	-5.77724	-5.4927	-5.58754	-5.93282	-5.52782	-5.43229	-5.24977	-5.59929	-5.86647	-5.03809	-5.7029	-5.39537	-5.69133	-5.72283	-5.56671	-5.59052	-5.38908	-5.17771	-5.56395	-5.62814	-5.61966	-5.8092	-5.57502	-5.41005	-5.48019	-6.10534	-5.59652	-5.5179	-5.60924	-5.41398	-5.30675	-5.62087	-5.79576	-5.72464	-5.75117	-5.55885	-5.80202	-5.62779	-5.4203	-5.46406	-5.51891
C00007500:Dihydrodipicolinic acid|	C03340	LC	-6.46828	-6.75719	-6.83773	-6.841	-6.36197	-6.49155	-6.77074	-6.59781	-6.58369	-6.54486	-6.55063	-6.69018	-4.90951	-4.80355	-4.32475	-4.57157	-4.84714	-4.29848	-4.69641	-4.52511	-4.26007	-4.27473	-4.33249	-5.99852	-6.28468	-6.25556	-6.26422	-6.5529	-6.17969	-6.30261	-6.68977	-7.03352	-6.72147	-6.4971	-6.84256	-6.35055	-6.46014	-6.4434	-6.16247	-6.7964	-6.81535	-4.8283	-5.00799	-4.81214	-5.25858	-5.36719	-4.80106
C00007502:"2,3,4,5-Tetrahydrodipicolinate"|	C03972	LC	-5.22906	-5.16144	-5.48515	-5.39144	-5.04061	-5.26059	-6.08616	-6.03604	-5.58675	-5.23149	-5.45702	-5.44654	-5.09712	-5.32212	-5.02532	-4.95257	-5.36397	-4.87835	-5.22244	-4.96678	-4.92517	-5.07858	-4.68799	-5.38534	-5.61851	-5.79194	-6.4329	-5.33283	-5.52632	-5.81303	-5.48842	-5.39	-5.67447	-5.4701	-5.57272	-5.41163	-5.46979	-5.73638	-5.37455	-5.33053	-5.95691	-5.61564	-5.47828	-5.24527	-5.94016	-6.17287	-5.52197
C00002727:Coniferin|	C00761	LC	-6.46828	-6.43566	-6.83773	-6.75345	-6.36197	-6.46327	-6.77074	-6.54679	-6.46733	-6.67406	-6.55063	-6.69018	-6.0849	-5.87266	-5.86305	-5.58668	-5.36433	-5.81575	-5.86767	-6.07694	-5.44502	-5.37566	-5.28982	-6.22759	-6.52017	-6.24249	-6.70618	-6.87165	-6.2856	-6.70828	-6.68977	-7.03352	-6.72147	-6.86671	-6.84256	-6.57236	-6.46014	-6.9153	-6.86254	-6.7964	-6.81535	-6.5588	-6.58731	-6.83177	-6.50104	-6.72125	-6.09184
C00007399:6-Methylthiohexanaldoxime|C00001348:L-Citrulline|	C00327|D07706|C00790	LC	-6.46828	-6.75719	-6.83773	-6.841	-6.36197	-6.49155	-6.77074	-6.59781	-6.58369	-6.89482	-6.55063	-6.69018	-5.01988	-5.53218	-5.64356	-5.07022	-4.74464	-4.83087	-5.02504	-4.95739	-5.13163	-5.07636	-4.1088	-6.32703	-6.59292	-6.65429	-6.70618	-6.87165	-6.79978	-6.70828	-6.68977	-7.03352	-6.72147	-6.86671	-6.84256	-5.10577	-5.38923	-6.9153	-5.08694	-5.882	-5.40068	-5.11801	-6.83585	-4.02821	-6.50104	-6.72125	-4.30271
C00001348:L-Citrulline|	C00327|D07706|C00790	LC	-6.18012	-5.63682	-6.19487	-5.98505	-5.75221	-6.21019	-6.67305	-6.53269	-6.58369	-6.54676	-6.55063	-6.29613	-5.81118	-6.37112	-5.63863	-6.02746	-5.80216	-5.51698	-6.12872	-5.76533	-5.88218	-5.79892	-5.67809	-6.13862	-6.30818	-6.33061	-6.70618	-5.82702	-6.79978	-6.70828	-6.44693	-6.17974	-6.72147	-6.40462	-6.84256	-6.57236	-5.9344	-6.9153	-6.86254	-6.7964	-6.81535	-5.58857	-4.94556	-5.3495	-5.57523	-5.5339	-4.98661
C00002728:Coniferaldehyde|	C02666	LC	-6.46828	-5.36234	-6.83773	-6.15348	-5.65266	-6.49155	-5.77738	-5.75941	-5.92533	-6.89482	-5.83089	-5.2997	-4.79327	-5.13891	-5.02509	-4.86551	-4.58264	-5.87123	-6.73771	-5.30997	-6.65993	-6.7759	-5.09046	-5.34434	-5.46531	-6.21797	-5.47669	-5.14318	-6.79978	-6.29574	-6.68977	-4.64541	-4.75186	-6.86671	-5.70904	-6.57236	-6.46014	-6.83877	-5.71814	-6.7964	-6.45962	-4.75796	-5.01576	-5.3568	-6.50104	-6.72125	-4.96133
C00007416:L-Gluconolactone|C00007388:"L-Galactono-1,4-lactone"|	D04332|C00198	LC	-6.46828	-6.75719	-6.83773	-6.841	-6.36197	-6.49155	-6.77074	-6.59781	-6.58369	-6.89482	-6.55063	-6.69018	-6.51584	-6.68474	-6.81989	-6.54101	-6.75419	-6.39879	-6.73771	-6.74137	-6.65993	-6.7759	-6.73923	-6.32703	-4.33086	-3.65467	-3.8465	-6.87165	-3.53627	-2.35325	-3.14522	-2.64264	-2.32244	-2.59814	-2.41536	-2.79057	-2.97782	-2.55081	-2.67005	-2.7177	-2.51095	-6.8169	-6.83585	-6.83177	-6.04897	-6.72125	-6.57593
C00007299:Phosphorylcholine|	C00588	LC	-5.48602	-6.64922	-6.04871	-6.09028	-5.66776	-5.87722	-6.77074	-6.26749	-6.58369	-6.6188	-6.29272	-6.32597	-5.79574	-5.81446	-5.70157	-5.97931	-5.85145	-5.99259	-5.9165	-6.27054	-5.748	-6.71101	-5.7379	-6.26549	-6.42097	-6.31401	-6.70618	-6.44179	-6.71813	-6.70828	-6.68977	-7.03352	-6.72147	-6.86671	-6.84256	-6.57236	-6.46014	-6.9153	-6.86254	-6.7964	-6.81535	-6.59286	-6.83009	-6.48955	-6.50104	-6.5205	-6.29616
C00007596:"LL-2,6-Diaminoheptanedioate"|C00007595:"meso-2,6-Diaminoheptanedioate"|	C00666	LC	-4.62504	-4.54132	-5.28413	-5.45639	-5.4278	-4.77681	-5.29824	-5.19953	-5.12063	-5.08045	-4.21449	-4.7551	-4.12663	-3.95444	-3.51787	-3.62033	-3.60389	-3.73944	-3.72356	-3.66365	-3.85093	-3.47483	-2.88325	-2.64412	-2.16387	-2.6817	-3.07362	-2.07252	-3.35292	-2.97138	-2.30666	-2.94805	-4.38532	-4.75799	-3.93557	-4.56777	-3.82272	-6.9153	-4.68511	-6.46463	-4.21639	-3.32014	-3.19061	-4.41879	-3.61509	-3.37833	-2.75652
C00007676:8-Methylthiooctanaldoxime|	C17251	LC	-6.46828	-6.75719	-6.83773	-6.841	-6.36197	-6.49155	-6.77074	-6.59781	-6.58369	-6.89482	-6.55063	-6.69018	-5.40481	-5.83483	-5.72851	-5.23299	-5.12509	-4.85183	-6.73771	-4.16968	-6.07747	-6.7759	-3.67367	-6.32703	-6.59292	-6.65429	-6.62484	-6.67043	-6.79978	-6.70828	-6.68977	-7.03352	-6.72147	-6.86671	-6.84256	-6.33508	-6.46014	-6.67336	-6.86254	-6.7964	-6.81535	-6.15952	-6.21667	-5.75864	-6.50104	-6.48246	-5.77002
C00002674:Syringic acid|	C10833	LC	-5.05163	-5.22057	-5.18263	-5.31885	-4.70495	-4.92065	-5.46924	-4.97969	-5.20511	-5.12762	-5.21098	-5.3557	-5.14024	-5.28455	-5.00403	-5.03275	-5.15504	-5.12534	-5.24919	-5.19697	-5.3846	-5.23253	-5.42676	-5.08852	-5.18713	-5.28551	-5.33234	-5.27965	-5.29427	-5.29467	-5.35936	-5.29914	-5.4712	-5.35907	-5.3954	-5.2912	-5.03554	-5.37063	-5.22731	-5.1888	-5.37168	-5.23459	-5.13293	-5.13558	-5.23235	-5.34053	-5.06642
C00001432:Spermine|	C00750	LC	-3.4846	-3.26222	-3.60275	-3.7504	-3.44118	-3.41523	-3.27675	-3.10128	-3.18533	-3.07012	-3.15768	-2.84325	-2.94962	-3.04592	-2.84307	-2.91703	-2.86429	-2.96257	-3.08702	-2.94768	-2.90382	-2.83629	-2.88506	-2.85905	-2.65695	-2.47477	-2.99024	-2.7195	-2.80135	-2.35217	-2.5947	-2.72234	-2.88916	-2.83665	-2.63419	-3.62192	-3.58721	-3.89896	-3.50405	-3.50869	-3.59344	-2.99207	-3.24004	-4.07168	-3.50909	-3.47108	-3.13899
C00007457:Glycolaldehyde|	C00266	LC	-5.6429	-5.55208	-5.80195	-5.81434	-5.77594	-5.62404	-5.84678	-5.69251	-5.79111	-5.6958	-5.7067	-5.66145	-5.6837	-5.70793	-5.55146	-5.63876	-5.56134	-5.56433	-5.66148	-5.6697	-5.57669	-5.60539	-5.45436	-5.76471	-5.81426	-5.7108	-5.79317	-5.81769	-5.85183	-5.67547	-5.75606	-5.75084	-5.74027	-5.74221	-5.78107	-5.7682	-5.4138	-5.68063	-5.69393	-5.51192	-5.52163	-5.79406	-5.77051	-5.75782	-5.8168	-5.8672	-5.67904
C00043689:Lycoperoside H|Toma49:Hydroxytomatine isomer #3|Toma48:Hydroxytomatine isomer #2|Toma51:Hydroxytomatine isomer #5|		LC	-1.21254	-1.29269	-1.22297	-1.43919	-1.30358	-1.13624	-1.45248	-1.22724	-1.36929	-1.29782	-1.09562	-1.02578	-1.11807	-1.11385	-1.28371	-1.13991	-1.17052	-0.941663	-1.25508	-1.19058	-1.03644	-1.3555	-1.01564	-0.66139	-0.564002	-0.517466	-0.888053	-0.720726	-0.874746	-0.693767	-0.714939	-1.06347	-0.895388	-1.05253	-0.89939	-1.06161	-1.57633	-1.51269	-1.29791	-1.57072	-1.49776	-1.18345	-1.15568	-1.11715	-1.24967	-1.35255	-0.733071
C00001398:L-Valine|	C06417|C16436|C00183	LC	-3.47426	-3.13795	-3.48812	-3.16545	-3.49892	-3.28064	-2.92594	-2.64559	-3.13462	-2.7279	-3.02758	-2.70139	-1.32129	-1.21718	-0.966087	-1.00122	-0.892792	-0.803133	-0.612876	-0.799956	-0.653996	-0.774912	-0.500736	-1.34005	-1.20566	-1.24742	-1.52795	-1.25722	-1.6916	-1.24015	-1.10716	-1.39688	-1.33534	-1.48013	-1.28801	-1.43387	-1.85311	-1.57612	-1.38967	-1.53113	-1.81784	-1.34288	-1.13583	-0.692752	-1.33327	-1.07991	-0.735641
C00007674:Phenylacetonitrile|	C16074|C04116	LC	-5.6429	-5.55208	-5.80195	-5.81434	-5.77594	-5.62404	-5.84678	-5.69251	-5.79111	-5.6958	-5.7067	-5.66145	-5.6837	-5.70793	-5.55146	-5.63876	-5.56134	-5.56433	-4.28262	-4.23709	-4.69693	-4.77443	-4.02883	-5.76471	-5.81426	-5.7108	-5.79317	-5.81769	-5.85183	-5.67547	-5.75606	-5.75084	-5.74027	-5.74221	-5.78107	-5.7682	-5.84892	-5.7647	-5.80229	-5.78454	-5.77935	-5.79406	-5.77051	-5.75782	-5.8168	-5.8672	-5.67904
C00007469:L-Aspartate 4-semialdehyde|	C00441	LC	-3.62	-3.33935	-3.78474	-3.75984	-3.83959	-3.53116	-3.88152	-3.6854	-3.83729	-3.98651	-4.06895	-4.08711	-3.42111	-3.26485	-3.24989	-3.26002	-3.25275	-3.0554	-3.464	-3.40907	-3.40074	-3.56583	-3.45987	-4.05461	-3.99247	-3.87084	-4.25956	-4.28138	-4.12374	-5.33135	-5.25424	-5.53672	-5.14381	-5.41554	-5.51074	-5.398	-5.85362	-5.6853	-5.5154	-5.78454	-5.77935	-4.12776	-4.02664	-4.02588	-4.49356	-4.22196	-3.80235
C00007623:2-Ketoisovalerate|	C00141|C06255|C00567	LC	-5.6429	-5.55208	-5.80195	-5.81434	-5.77594	-5.62404	-5.36916	-5.42402	-5.79111	-5.6958	-5.7067	-5.66145	-5.6837	-5.70793	-5.55146	-5.63876	-5.56134	-5.56433	-5.66148	-5.6697	-5.57669	-5.60539	-5.45436	-5.76471	-5.03353	-5.04086	-5.04643	-5.00919	-5.28292	-5.67547	-5.75606	-5.75084	-5.74027	-5.74221	-5.78107	-5.7682	-5.85362	-5.7647	-5.80229	-5.78454	-5.77935	-5.79406	-5.77051	-5.75782	-5.8168	-5.8672	-5.41246
C00001183:Fumaric acid|C00007417:Maleate|	C00122|D02308	LC	-0.305502	0.113736	-0.355048	-0.265603	-0.227452	-0.0757811	-0.421981	-0.0763223	-0.313582	-0.0418283	-0.224443	-0.115447	0.140049	0.203806	0.378324	0.298506	0.360601	0.488653	-0.3252	-0.0835314	0.0443066	0.10613	0.195044	0.187626	0.294399	0.397124	0.198632	0.264366	0.104936	0.773513	0.682527	0.673921	0.682333	0.0699436	0.525817	0.353453	0.361487	0.381914	0.490059	0.638002	0.62123	0.355468	0.541689	0.142774	0.194365	0.2068	0.667297
C00002657:4-Hydroxybenzaldehyde|C00000207:Benzoic acid|	C03096|D02277|C00180|D00038	LC	-0.0037165	0.0390151	0.0614212	-0.0529734	0.138975	0.112324	-0.055332	0.178859	0.0560505	-0.00707366	-0.0474902	0.000361565	0.0218108	0.114696	0.135852	0.154383	0.0318499	0.296625	-0.0291953	0.111583	0.134757	-0.0768272	0.0108188	-0.309976	-0.310163	-0.0754675	-0.630175	-0.446512	-0.394682	-0.926129	-0.849471	-1.27276	-1.06423	-1.26961	-1.11527	-1.32279	-1.85149	-1.5631	-1.4793	-1.83367	-1.75518	-0.703643	-0.487133	-0.579702	-0.707035	-0.683292	-0.397845
C00007535:Benzeneacetaldehyde|	C00601	LC	-2.2843	-2.01053	-2.90788	-2.5744	-2.0802	-2.23976	-3.15484	-3.03217	-3.16881	-2.99661	-3.07082	-2.72491	-1.41753	-1.75259	-1.47969	-1.14583	-0.998956	-0.710528	-1.58473	-1.44466	-1.47574	-1.05879	-0.881845	-2.64395	-3.00771	-2.72746	-3.50042	-3.30577	-2.95103	-3.59577	-3.3357	-3.52594	-3.85092	-3.6567	-3.89424	-2.48595	-2.84222	-3.04589	-2.93418	-3.36367	-3.50149	-1.70092	-1.57047	-1.77192	-2.00717	-1.99375	-1.30646
C00001205:Succinic acid|	C00042	LC	-3.44917	-3.12523	-3.40284	-3.36588	-3.407	-3.42617	-3.72255	-3.48521	-3.70681	-3.35926	-3.54575	-3.49602	-4.38622	-3.89002	-3.6616	-3.96479	-3.9697	-3.73231	-4.70097	-4.45931	-4.38639	-3.67818	-3.93633	-4.5296	-4.67316	-4.5332	-4.74354	-4.18635	-4.22329	-4.44664	-4.29694	-4.12137	-4.22128	-3.90976	-4.28132	-4.3838	-4.56556	-4.19229	-5.10273	-4.11068	-4.18694	-3.98946	-3.95324	-3.94625	-4.22358	-4.22187	-3.76042
C00007403:Pyroglutamic acid|	C01879|C02237|C02238	LC	-6.46828	-6.75719	-6.83773	-6.841	-6.36197	-6.49155	-3.96092	-6.59781	-3.96585	-6.89482	-3.90144	-3.94428	-3.30126	-3.47017	-2.95609	-3.07622	-3.37103	-2.98842	-3.34875	-3.27493	-3.29852	-3.04922	-3.35562	-2.40564	-2.32272	-2.36785	-2.68603	-2.18175	-2.49141	-2.36389	-2.37635	-2.23039	-2.54771	-2.61891	-2.18549	-2.97357	-2.79776	-3.35734	-3.04188	-2.88568	-3.71067	-2.94477	-2.92924	-2.83686	-2.85251	-3.09627	-2.74278
C00001374:L-isoleucine|C00001377:L-Leucine|	C16434|C00407|C06418	LC	-2.01617	-1.79187	-2.12929	-1.90532	-1.57514	-1.86144	-2.36485	-2.29087	-2.45748	-2.04348	-2.02216	-1.90618	-2.28125	-2.49979	-2.15166	-2.35007	-2.61865	-2.5401	-1.21343	-1.3941	-1.42611	-1.17339	-0.917595	-1.79273	-1.582	-1.53486	-1.88295	-1.51781	-1.64425	-1.09316	-1.67477	-1.01057	-1.40376	-1.1779	-1.26199	-0.902096	-0.924022	-0.518428	-0.856645	-1.01024	-0.663893	-1.702	-1.77834	-1.78485	-1.83442	-1.8893	-1.73374
C00007378:5-Aminolevulinic acid|C00001370:trans-4-Hydroxy-L-proline|C00007379:L-Glutamate 1-semialdehyde|C00007475:L-Glutamate 5-semialdehyde|	C00430|D02908|D07567	LC	-3.36254	-2.78557	-3.2319	-3.03293	-3.26971	-3.09808	-2.83325	-2.63634	-2.70576	-2.56482	-2.81766	-2.47103	-1.44842	-1.57745	-0.949732	-1.24758	-1.12586	-1.15866	-0.864379	-0.77955	-0.911341	-0.683744	-0.504937	-1.1722	-0.752206	-0.641032	-1.04777	-0.560952	-0.933067	-0.571447	-0.616597	-0.558422	-0.677342	-0.757179	-0.536657	-1.12052	-1.29619	-1.38355	-1.17479	-0.972481	-1.12842	-1.33051	-1.20405	-0.808121	-1.40459	-1.36804	-0.81076
C00001192:L-(-)-Malic acid|	C00497|C00149|C00711	LC	0.642332	0.993513	0.58649	0.725647	0.687921	0.915481	0.554195	0.78727	0.530763	0.873953	0.756455	0.81581	1.03101	1.00711	1.32372	1.02947	1.22112	1.2531	0.536535	0.765576	0.918436	1.08651	1.22506	1.09545	1.11848	1.25936	0.990987	1.08019	1.01892	1.54248	1.36485	1.47335	1.33037	1.04252	1.41258	1.10319	1.05152	1.04228	1.11864	1.48571	1.4039	1.09634	1.2011	1.14602	0.95709	0.995855	1.41426
C00001555:Trigonelline|C00007382:Anthranilic acid|C00001401:p-Aminobenzoic acid|	C01004	LC	-3.71356	-3.25013	-3.76676	-3.633	-3.26651	-3.89666	-3.64205	-3.41941	-3.60123	-3.37945	-3.49177	-3.49436	-3.057	-3.02803	-2.62422	-2.91914	-2.948	-2.67622	-2.96673	-2.71539	-2.96324	-2.64222	-2.74487	-3.54596	-3.23665	-3.36557	-3.51252	-3.20075	-3.27427	-3.41507	-3.90636	-3.73905	-3.24277	-3.45795	-3.70613	-3.8097	-6.46014	-3.94347	-3.93941	-4.12182	-4.03269	-5.53768	-3.01557	-3.29299	-3.19695	-3.29767	-2.848
C00007546:Methylbenzoate|	C07211|C07215	LC	-3.69657	-3.64414	-3.53817	-3.66266	-3.52717	-3.46994	-3.81409	-3.59426	-3.7007	-3.68175	-3.8009	-3.70885	-3.62642	-3.53872	-3.66161	-3.52864	-3.78859	-3.38955	-3.89714	-3.61002	-3.55476	-3.81513	-3.737	-3.99366	-4.0397	-3.91838	-4.3173	-4.2025	-4.14507	-4.68231	-4.53978	-5.10972	-4.67694	-4.98297	-4.6589	-4.80423	-5.22013	-5.25998	-4.83122	-5.20905	-5.34385	-4.23599	-4.04494	-4.24125	-4.11331	-4.35266	-4.01805
C00007265:N-Carbamoyl-L-aspartate|C00007648:2-Oxo-6-methylthiohexanoic acid|	C00438	LC	-5.6429	-5.55208	-5.80195	-5.81434	-5.77594	-5.62404	-5.84678	-5.69251	-5.79111	-5.6958	-5.7067	-5.66145	-5.6837	-5.70793	-5.55146	-5.63876	-5.56134	-5.56433	-5.66148	-5.6697	-5.57669	-5.60539	-5.45436	-5.76471	-5.81426	-5.7108	-5.79317	-5.81769	-5.85183	-5.67547	-5.75606	-5.75084	-5.74027	-5.74221	-5.78107	-5.7682	-5.06934	-5.72486	-5.80229	-5.78454	-5.77935	-5.79406	-5.77051	-5.75782	-5.8168	-5.8672	-5.67904
C00001179:(+)-Ascorbic acid|	C00072	LC	-5.6429	-5.55208	-5.80195	-5.81434	-5.77594	-5.62404	-5.84678	-5.69251	-5.79111	-5.6958	-5.7067	-5.66145	-5.6837	-5.70793	-5.55146	-5.63876	-5.56134	-5.56433	-5.66148	-5.6697	-5.57669	-5.60539	-5.39897	-5.76471	-5.81426	-5.7108	-5.79317	-5.81769	-5.85183	-5.24144	-5.75606	-4.48233	-3.90511	-4.43882	-4.19979	-3.99511	-3.94791	-3.81014	-5.48936	-4.02432	-3.40763	-5.79406	-5.77051	-5.75782	-5.8168	-5.8672	-5.67904
C00000615:Caffeic acid|	C01197|C01481	LC	-4.02524	-3.64803	-3.69962	-3.60996	-3.7124	-5.62404	-3.83689	-5.69251	-5.79111	-5.6958	-5.7067	-3.55955	-1.94175	-1.96062	-1.72618	-1.749	-1.50442	-1.29772	-1.32839	-1.55262	-1.27579	-1.41432	-1.24733	-2.43876	-2.39551	-2.6762	-2.99609	-2.57071	-3.0545	-3.0301	-2.99733	-3.55329	-3.32446	-3.67541	-3.08284	-2.51601	-3.517	-2.88881	-2.46999	-3.11913	-3.40183	-1.72259	-1.51007	-1.43086	-1.5473	-1.59317	-1.11765
C00001397:L-Tyrosine|	C00082|C01536|C06420	LC	-2.51722	-2.39683	-2.42963	-2.20828	-1.85878	-2.013	-2.69044	-2.61405	-2.79493	-2.40523	-2.50666	-2.29877	-1.36693	-1.77748	-1.21181	-1.56003	-1.691	-1.47062	-0.460779	-0.419286	-0.465135	-0.41686	-0.0647917	-2.28671	-2.01143	-2.11382	-2.61223	-2.15735	-2.55557	-1.73464	-2.45773	-1.93492	-1.89499	-1.84977	-2.04097	-1.3218	-1.41751	-1.14145	-1.34275	-1.53673	-1.18128	-2.25212	-2.17059	-1.5291	-2.30411	-2.33665	-1.90999
C00001119:alpha-D-Galactopyranose|C00033848:Fructose|C00001117:D-Fructose|C00001122:D-Glucose|C00019681:D-(+)-Galactose|C00001126:alpha-D-Mannopyranose|C00001164:Myoinositol|	C02336|C01719|C10906|C00095|C01496	LC	-5.6429	-5.55208	-5.80195	-5.81434	-5.77594	-3.5874	-3.41904	-3.55339	-5.79111	-5.6958	-5.7067	-3.62973	-5.6837	-5.70793	-3.39472	-5.63876	-3.44314	-3.97561	-3.16694	-3.25509	-3.02453	-3.83607	-3.05212	-4.03417	-3.56143	-3.60023	-3.84767	-5.81769	-5.85183	-5.67547	-5.12673	-5.75084	-4.31921	-5.74221	-5.78107	-4.66468	-5.85362	-5.7647	-5.80229	-4.02776	-5.77935	-5.79406	-5.77051	-3.65446	-3.73023	-5.8672	-3.27391
C00007286:3-Phosphoglycerate|	C00197|C00597	LC	-5.6429	-5.54519	-5.80195	-5.81434	-5.7382	-5.62404	-5.84678	-5.69251	-5.79111	-5.6958	-5.7067	-5.66145	-5.6837	-5.47647	-5.55146	-5.63876	-5.56134	-5.56433	-5.66148	-5.6697	-5.57669	-5.60539	-5.45436	-5.76471	-5.58283	-5.47117	-5.57161	-5.72084	-5.45787	-5.07048	-5.75606	-5.12797	-5.74027	-5.47888	-4.83256	-5.48515	-5.26098	-5.31687	-5.80229	-5.22287	-5.73847	-5.79406	-5.77051	-5.75782	-5.8168	-5.8672	-5.49217
C00007558:Syringaldehyde|		LC	-3.13965	-5.55208	-3.39429	-3.05787	-5.77594	-5.62404	-3.52836	-3.38978	-3.55574	-5.6958	-5.7067	-3.30227	-3.80201	-3.66949	-3.47627	-3.65042	-3.76961	-3.74058	-3.85672	-3.94253	-3.88708	-3.89303	-3.78624	-5.76471	-5.43107	-5.31891	-5.79317	-5.81769	-5.85183	-5.67547	-5.75606	-5.75084	-5.74027	-5.74221	-5.78107	-5.7682	-5.85362	-5.7647	-5.80229	-5.78454	-5.77935	-5.79406	-5.77051	-5.75782	-5.8168	-4.48862	-5.67904
C00007390:UDP-D-galactose|C00001514:UDP-D-glucose|	C00052	LC	-0.749555	-0.534197	-0.65427	-0.489738	-0.68248	-0.599283	-0.952452	-0.708134	-0.815763	-0.747915	-0.77422	-0.603586	-1.03317	-1.12966	-0.832644	-1.00033	-0.994716	-0.763694	-1.39194	-1.4449	-1.1125	-0.957778	-1.03275	-0.662412	-0.630706	-0.452152	-0.740987	-0.614435	-0.59581	-0.416446	-0.764031	-0.383343	-0.446455	-0.41293	-0.273673	-0.0467317	-0.513037	-0.309934	-0.370351	0.0642508	-0.0356471	-0.401766	-0.377075	-0.110474	-0.519877	-0.509448	-0.311111
C00007619:Citric acid|C00001188:Isocitric acid|	C00158|C12649|D00037	LC	-0.0522087	0.597089	0.361498	0.442349	0.120673	0.33284	-0.433782	0.206856	-0.0671997	0.370412	-0.213831	-0.155128	0.0922409	0.107317	0.756073	0.395131	0.230976	0.445045	-0.202963	0.233146	0.105813	0.831774	0.562923	-0.235338	0.0632298	0.246097	-0.364937	0.0796631	0.23288	-0.165728	-0.344933	0.0852135	-0.110836	0.224836	0.23317	-0.000749454	-0.175908	-0.124998	-0.179681	0.0939177	0.070844	0.244174	0.290347	0.0882342	-0.396576	-0.352866	0.20441
C00007419:1-aci-Nitro-2-indolylethane|		LC	-2.86951	-2.69751	-2.81027	-2.97499	-3.15504	-3.00369	-3.06253	-2.73641	-3.20645	-2.77216	-2.64533	-2.49932	-2.54165	-2.50039	-2.42524	-2.75346	-2.22806	-2.45463	-2.86022	-2.8606	-2.67407	-2.65119	-2.89085	-2.45386	-2.35649	-2.21442	-2.46855	-2.41642	-2.31777	-2.48431	-2.47818	-2.89233	-2.83582	-2.65092	-2.65478	-1.93098	-2.28529	-2.18238	-2.26344	-2.51205	-2.07759	-2.39521	-2.33849	-2.21264	-2.4948	-2.35247	-2.1643
C00007619:Citric acid|C00001188:Isocitric acid|C00002499:Scopoletin|	C00158|C12649|D00037	LC	-5.6429	-5.55208	-5.80195	-5.60407	-5.77594	-5.62404	-5.84678	-5.69251	-5.79111	-5.58392	-5.7067	-5.66145	-5.6837	-5.70793	-3.79224	-5.63876	-5.56134	-5.56433	-4.9356	-5.6697	-5.57669	-5.50533	-5.45436	-5.76471	-5.4935	-5.7108	-5.79317	-5.81769	-4.36531	-5.67547	-5.75606	-5.75084	-5.74027	-5.74221	-5.43829	-5.7682	-5.85362	-5.02332	-5.80229	-5.78454	-5.77935	-5.06201	-5.77051	-5.75782	-4.95562	-5.8672	-4.70083
C00007369:Mg-protoporphyrin IX|	C03516	LC	-5.26217	-4.91132	-5.80195	-5.2766	-5.06528	-4.77176	-5.01657	-5.28313	-5.26906	-4.83914	-4.92568	-5.66145	-5.6837	-5.52905	-5.38282	-5.25427	-5.56134	-5.56433	-5.66148	-5.6697	-4.93473	-5.60539	-5.45436	-5.30633	-5.00469	-5.7108	-4.92765	-4.84759	-5.1768	-4.74473	-5.01637	-4.67445	-4.8478	-4.83413	-4.92469	-5.7682	-5.85362	-5.7647	-5.80229	-5.78454	-5.77935	-4.6275	-5.71393	-5.75782	-5.8168	-5.71628	-5.67904
C00002499:Scopoletin|	C01752	LC	-3.80235	-4.02171	-3.94248	-3.96223	-3.78072	-3.94798	-4.20227	-3.96951	-3.9173	-4.10214	-3.9012	-4.15514	-3.89795	-4.10218	-4.00209	-3.80358	-4.25231	-3.73907	-4.25016	-4.07794	-4.01888	-3.83667	-4.04678	-3.68769	-3.91843	-4.03122	-4.06446	-3.97059	-4.00005	-4.09141	-4.16553	-4.20223	-4.16544	-3.98345	-3.98465	-3.94574	-3.77072	-4.07007	-3.97414	-4.03258	-4.07653	-3.92637	-3.99716	-4.05985	-3.95641	-4.06682	-3.86935
C00007303:D-Gluconate|	D05862|C00257	LC	-5.6429	-5.55208	-5.80195	-5.81434	-5.77594	-5.62404	-5.84678	-5.69251	-5.79111	-5.6958	-5.7067	-5.66145	-5.6837	-5.70793	-5.55146	-5.63876	-5.56134	-5.56433	-5.66148	-5.6697	-5.57669	-5.60539	-5.0653	-5.76471	-5.81426	-5.7108	-5.79317	-5.81769	-5.85183	-5.67547	-5.75606	-5.75084	-5.74027	-5.74221	-5.78107	-5.7682	-5.85362	-5.7647	-5.80229	-5.78454	-5.77935	-5.79406	-5.77051	-5.75782	-5.8168	-5.8672	-5.67904
C00007256:NAD|	D00002|C00004|C00003	LC	-5.6429	-5.55208	-5.80195	-5.81434	-5.77594	-5.62404	-5.84678	-5.69251	-5.79111	-5.6958	-5.7067	-5.66145	-5.6837	-5.70793	-5.55146	-5.63876	-5.56134	-5.56433	-5.66148	-5.6697	-5.57669	-5.60539	-5.45436	-5.76471	-5.81426	-5.7108	-5.79317	-5.81769	-5.85183	-5.67547	-5.75606	-5.75084	-5.74027	-5.74221	-5.78107	-5.7682	-5.85362	-5.7647	-5.80229	-5.78454	-5.77935	-5.79406	-5.77051	-5.74632	-5.8168	-5.8672	-5.67904
C00007653:2-(6'-Methylthio)hexylmalic acid|	C17226	LC	-4.54934	-4.5437	-5.0012	-4.85741	-4.70675	-4.76813	-4.64232	-4.38916	-4.73592	-4.79673	-4.82543	-4.50856	-4.68659	-4.6569	-4.37987	-4.30689	-4.40174	-4.56433	-4.32374	-4.73988	-4.24	-4.57688	-4.60224	-4.8236	-4.63555	-4.62149	-4.71934	-4.80074	-4.78328	-4.61059	-4.90806	-4.84164	-4.8637	-5.20694	-4.82581	-4.76631	-5.19552	-4.64092	-4.9575	-4.98048	-4.72693	-4.90711	-4.69843	-5.12022	-4.87696	-4.49871	-4.45598
C00007233:Naringenin chalcone|C00000982:Naringenin|	C01477|C06561	LC	-5.6429	-5.55208	-5.80195	-5.81434	-5.77594	-5.62404	-5.84678	-5.69251	-5.79111	-5.6958	-5.7067	-5.66145	-5.6837	-5.70793	-5.55146	-5.63876	-4.90507	-5.08925	-5.66148	-5.6697	-5.57669	-5.60539	-5.34651	-5.76471	-5.81426	-5.7108	-5.5225	-5.6912	-5.85183	-5.67547	-5.75606	-5.75084	-5.53955	-5.74221	-5.78107	-5.7682	-5.85362	-5.7647	-5.80229	-5.78454	-5.77935	-5.4109	-5.73067	-5.75782	-5.64816	-5.65806	-5.59532
C00007481:6-Phospho-D-gluconate|	C00345	LC	-3.80053	-3.24464	-4.16102	-4.19086	-4.21981	-4.31069	-4.1182	-3.94014	-4.12525	-4.11813	-5.7067	-4.33275	-3.16407	-3.00456	-2.7837	-3.0423	-2.93457	-2.62888	-4.06063	-4.26661	-3.3972	-3.36483	-3.95969	-3.4556	-3.508	-3.76436	-3.44318	-3.07458	-4.29253	-2.94632	-3.09267	-2.92939	-3.18701	-3.52813	-3.47443	-4.09852	-3.12412	-3.63707	-3.32961	-4.72189	-4.93157	-2.96233	-2.86185	-5.75782	-3.37337	-3.58746	-2.86064
C00007650:2-(7'-Methylthio)heptylmalic acid|	C17230	LC	-5.6429	-5.55208	-5.80195	-5.81434	-5.77594	-5.62404	-5.84678	-5.69251	-5.79111	-5.6958	-5.7067	-5.66145	-5.6837	-5.70793	-5.55146	-5.63876	-5.56134	-5.56433	-5.66148	-5.6697	-5.57669	-5.60539	-5.45436	-5.76471	-5.81426	-5.7108	-5.79317	-5.81769	-5.85183	-5.67547	-5.75606	-5.75084	-5.74027	-5.74221	-5.78107	-5.7682	-5.85362	-5.7647	-5.80229	-5.78454	-5.77935	-5.79406	-5.77051	-5.75782	-5.8168	-5.8672	-5.67904
C00007395:5-Phosphoribosylglycineamide|		LC	-5.6429	-5.55208	-5.80195	-5.81434	-5.77594	-5.62404	-5.7198	-5.10562	-5.39057	-5.08983	-5.32819	-5.26392	-5.6837	-5.70793	-5.55146	-5.63876	-5.56134	-5.56433	-5.66148	-5.6697	-5.57669	-5.60539	-5.45436	-5.76471	-5.81426	-5.7108	-5.79317	-5.81769	-5.85183	-5.67547	-5.75606	-5.75084	-5.74027	-5.74221	-5.78107	-5.7682	-5.85362	-5.7647	-5.80229	-5.78454	-5.77935	-5.79406	-5.77051	-5.75782	-5.8168	-5.8672	-5.67904
C00007234:(+)-Dihydrokaempferol|	C00974	LC	-5.6429	-5.55208	-5.80195	-5.81434	-5.77594	-5.62404	-5.84678	-5.69251	-5.79111	-5.6958	-5.7067	-5.66145	-5.6837	-5.70793	-5.55146	-5.63876	-5.56134	-5.56433	-5.66148	-5.6697	-5.57669	-5.60539	-5.45436	-5.76471	-5.81426	-5.7108	-5.79317	-5.81769	-5.85183	-5.67547	-5.75606	-5.75084	-5.74027	-5.74221	-5.78107	-5.7682	-5.85362	-5.7647	-5.80229	-5.78454	-5.77935	-5.79406	-5.77051	-5.75782	-5.8168	-5.8672	-5.67904
C00007597:"N-Succinyl-LL-2,6-diaminoheptanedioate"|	C04421	LC	-5.6429	-5.55208	-5.80195	-5.81434	-5.77594	-5.62404	-5.84678	-5.64974	-5.79111	-5.66983	-5.7067	-5.66145	-5.6837	-5.70793	-5.55146	-5.63876	-5.56134	-5.56433	-5.64593	-5.6561	-5.57669	-5.58249	-5.45436	-5.76471	-5.81426	-5.7108	-5.79317	-5.81769	-5.85183	-5.67547	-5.75606	-5.75084	-5.74027	-5.74221	-5.78107	-5.7682	-5.85362	-5.7647	-5.80229	-5.78454	-5.77935	-5.79406	-5.77051	-5.75782	-5.8168	-5.8672	-5.63643
C00000947:(+)-Catechin|C00000956:(-)-Epicatechin|	D00200|C06562	LC	-5.6429	-5.55208	-5.80195	-5.7216	-5.77594	-5.33457	-5.68328	-5.69251	-5.79111	-5.6958	-5.62264	-5.66145	-4.91052	-5.00793	-5.55146	-5.07734	-4.38392	-5.56433	-5.12543	-5.61617	-4.89321	-5.35516	-4.32211	-5.76471	-5.81426	-5.7108	-5.79317	-5.81769	-5.85183	-5.67547	-5.75606	-5.75084	-5.74027	-5.74221	-5.78107	-5.7682	-5.85362	-5.7647	-5.80229	-5.78454	-5.77935	-5.79406	-5.77051	-5.75782	-5.8168	-5.8672	-5.67904
C00000365:12-oxo-PDA|	C01226	LC	-4.65151	-5.55208	-5.80195	-5.81434	-5.36861	-5.62404	-5.84678	-5.24678	-5.79111	-5.6958	-4.87036	-4.3805	-5.6837	-5.15921	-5.55146	-5.63876	-5.50982	-5.56433	-5.66148	-4.40842	-5.57669	-5.60539	-4.86928	-5.76471	-5.27821	-5.7108	-4.46174	-5.81769	-5.07392	-5.67547	-5.36624	-5.75084	-5.22425	-5.74221	-5.78107	-5.7682	-5.44721	-5.7647	-5.80229	-5.78454	-5.77935	-5.79406	-5.77051	-5.75782	-5.8168	-5.8672	-5.10179
C00007432:"18-Hydroxyoctadeca-9Z,12Z-dienoic acid"|		LC	-3.14742	-3.03406	-3.18757	-3.24573	-2.94831	-3.05629	-3.45465	-3.24329	-3.18132	-3.20709	-3.12961	-3.30841	-3.2616	-3.39379	-3.24331	-3.15154	-3.38722	-3.12757	-3.39018	-3.41811	-3.20391	-3.1533	-3.32063	-2.89999	-3.29141	-3.24602	-3.31485	-3.05602	-3.09994	-3.40498	-3.27068	-3.39813	-3.38862	-3.25694	-3.32366	-3.09309	-3.11508	-3.42424	-3.25617	-3.22542	-3.15988	-3.28655	-3.13159	-3.3936	-3.06492	-3.3492	-3.23752
C00001518:L-Glutathione|	C00051	LC	-5.6429	-5.55208	-5.80195	-5.81434	-5.77594	-5.62404	-5.84678	-5.69251	-5.79111	-5.6958	-5.7067	-5.66145	-5.6837	-5.70793	-5.55146	-5.63876	-5.56134	-5.56433	-5.66148	-5.6697	-5.57669	-5.60539	-5.45436	-5.76471	-5.81426	-5.7108	-5.79317	-5.81769	-5.85183	-4.00998	-4.6633	-3.92124	-4.14638	-3.81278	-4.05805	-4.38827	-4.53788	-3.99636	-4.32761	-3.95583	-3.53656	-5.79406	-5.77051	-5.75782	-5.8168	-5.8672	-5.67904
C00003104:Botrydial|	C09622	LC	-5.6429	-5.55208	-5.80195	-5.81434	-5.77594	-5.62404	-5.84678	-5.69251	-5.79111	-5.6958	-5.7067	-5.66145	-5.6837	-5.70793	-5.55146	-5.63876	-5.56134	-5.56433	-5.66148	-5.6697	-5.57669	-5.60539	-5.45436	-5.76471	-5.81426	-5.7108	-5.79317	-5.81769	-5.85183	-5.67547	-5.75606	-5.6176	-5.74027	-5.74221	-5.78107	-5.7682	-5.85362	-5.7647	-5.80229	-5.78454	-5.77935	-5.79406	-5.77051	-5.75782	-5.8168	-5.8672	-5.67904
C00007670:2-O-L-ramnopyranosyl-4-Deoxy-alpha-L-threo-hex-4-enopyranosiduronoic acid|		LC	-5.6429	-5.55208	-5.80195	-5.81434	-5.77594	-5.62404	-5.84678	-4.79652	-5.79111	-5.6958	-5.7067	-5.66145	-5.6837	-5.70793	-5.55146	-5.63876	-5.56134	-5.56433	-5.13403	-5.6697	-5.57669	-5.60539	-4.57215	-5.76471	-5.81426	-5.7108	-5.79317	-5.81769	-5.85183	-5.67547	-5.75606	-5.75084	-5.74027	-5.74221	-5.78107	-5.7682	-5.85362	-5.7647	-5.80229	-5.78454	-5.77935	-5.79406	-5.77051	-5.75782	-5.8168	-5.8672	-5.67904
C00007444:Adenosine|	D00045|C00212	LC	-3.87594	-3.94015	-4.31551	-4.23892	-3.76981	-3.53351	-5.73793	-5.69323	-5.75409	-5.32325	-5.55201	-5.05789	-4.76911	-4.52123	-4.63605	-4.84715	-4.81366	-4.27844	-5.22781	-4.73631	-5.06696	-4.54095	-4.75149	-6.32703	-6.24052	-6.49079	-5.39235	-5.91713	-6.33275	-5.43292	-4.64723	-4.76528	-5.69123	-6.52443	-5.98437	-3.86958	-3.4423	-5.1677	-4.11582	-4.41423	-5.18383	-5.56566	-5.66722	-5.63774	-6.41385	-6.14207	-4.84671
C00030880:Octanal|	C01545	LC	-6.46828	-5.02815	-6.83773	-6.841	-6.36197	-6.49155	-6.77074	-6.59781	-6.58369	-6.89482	-6.14744	-6.69018	-6.51584	-6.68474	-6.81989	-5.58634	-6.75419	-6.39879	-6.73771	-6.74137	-6.40948	-4.86646	-4.95532	-6.32703	-5.90769	-6.65429	-6.40173	-5.70766	-5.30854	-6.70828	-6.19122	-7.03352	-6.72147	-5.9845	-6.84256	-6.57236	-5.01194	-6.9153	-6.86254	-6.7964	-4.97394	-6.8169	-5.57282	-6.83177	-5.64135	-6.72125	-5.68858
C00001384:L-Ornithine|	C01602|C00515|C00077	LC	-6.46828	-6.32924	-6.83773	-6.841	-6.36197	-6.49155	-6.77074	-6.59781	-6.58369	-6.89482	-6.55063	-6.69018	-5.9091	-6.68474	-6.81989	-6.54101	-6.75419	-6.39879	-6.73771	-5.41319	-6.65993	-6.09971	-6.73923	-6.32703	-6.59292	-6.44815	-6.70618	-6.87165	-6.45949	-6.70828	-6.22301	-6.06198	-6.10457	-6.40288	-6.43232	-6.57236	-5.90415	-6.11814	-6.38443	-6.28751	-6.18036	-6.8169	-6.83585	-6.83177	-6.50104	-6.72125	-6.57593
C00001342:L-Aspartic acid|	C00402|C00049|C16433	LC	-5.52338	-5.15466	-5.6655	-5.33147	-5.74108	-5.4096	-6.06667	-5.70074	-6.0055	-5.35581	-5.32196	-5.94035	-6.51584	-6.1937	-6.07198	-6.54101	-6.19662	-6.39879	-6.73771	-6.74137	-6.00814	-5.7111	-6.73923	-6.26136	-6.24252	-6.43139	-6.55938	-5.7116	-6.42857	-6.25053	-6.68977	-6.27115	-6.72147	-6.86671	-6.84256	-5.47552	-6.46014	-5.71265	-5.36011	-5.61847	-6.01852	-5.05479	-5.6821	-5.69691	-6.18086	-5.81831	-5.2062
C00007247:"(Z,Z,Z)-Octadeca-9,12,15-trienoic acid"|	C06427	LC	-5.53433	-5.72459	-6.27543	-5.83113	-5.77705	-5.8347	-6.68395	-5.93971	-6.54574	-6.19241	-6.37176	-6.39711	-5.48183	-5.3889	-5.42693	-5.39886	-5.20747	-5.86532	-5.12727	-5.03255	-4.52058	-4.76329	-4.58502	-5.60422	-5.611	-5.38281	-6.03353	-5.64711	-5.9406	-5.13539	-5.24795	-5.09971	-5.63919	-5.27982	-5.49528	-5.43315	-5.2489	-5.34467	-5.18106	-5.00768	-4.97522	-5.97721	-6.03308	-6.83177	-6.23722	-6.6833	-5.95865
C00007327:Phenylacetaldoxime|	C16075|C19714	LC	-3.13693	-3.28274	-3.19812	-3.06666	-2.53238	-2.92645	-3.63675	-3.66971	-3.77038	-3.42235	-3.54257	-3.25807	-2.38524	-2.8812	-2.25026	-2.67873	-2.79404	-2.4837	-1.30522	-1.3254	-1.37492	-1.44442	-1.00403	-3.6044	-3.54259	-3.4342	-3.9626	-3.61057	-3.66786	-3.17406	-4.07392	-3.38265	-3.11848	-3.09819	-3.40609	-2.3444	-2.46662	-2.08537	-2.38308	-2.74977	-2.18769	-3.52464	-3.31055	-2.67777	-3.52438	-3.35655	-3.15098
C00010872:(+/-)-beta-Phellandrene|C00000805:alpha-Pinene|C00000853:Myrcene|C00000816:beta-Pinene|C00029452:2-Carene|	C09880|C06308|C06306	LC	-5.46396	-5.52075	-5.92087	-6.13387	-5.83518	-5.61853	-6.4365	-6.08219	-6.32306	-6.41101	-6.10866	-6.18635	-5.99548	-6.125	-5.43057	-5.82548	-5.8998	-5.20092	-6.15545	-6.04709	-5.8765	-5.24052	-5.72155	-6.32703	-6.59292	-6.47287	-6.70618	-6.61901	-6.37507	-6.54909	-6.41828	-6.68171	-6.50434	-6.65258	-6.37367	-5.72757	-5.75382	-5.88979	-6.14862	-5.80052	-5.84892	-6.3657	-6.49007	-6.42193	-6.50104	-6.70945	-6.17977
C00001435:Tyramine|	C00483	LC	-4.97109	-4.49915	-5.10607	-6.841	-4.69885	-4.5393	-5.85443	-5.73135	-5.66823	-6.89482	-5.96479	-5.48279	-4.07424	-4.15513	-3.94394	-3.72427	-3.67661	-3.32075	-4.36137	-4.13794	-3.99185	-4.28341	-3.95723	-6.32703	-4.94494	-4.94542	-5.43517	-5.11243	-4.96928	-6.70828	-5.41238	-7.03352	-6.4181	-5.99262	-6.12122	-6.57236	-5.46627	-5.59746	-5.54954	-5.87432	-6.81535	-4.2241	-4.07593	-4.18427	-4.32955	-4.43019	-3.67378
C00034763:2-Pentylfuran|		LC	-5.23542	-5.06824	-5.45004	-5.48902	-5.62589	-5.17424	-5.71848	-5.39492	-6.12321	-5.7339	-5.77791	-5.77769	-4.73169	-5.13084	-4.81648	-5.19188	-4.78924	-5.10918	-4.58895	-4.76087	-4.92168	-4.41356	-4.53435	-5.61758	-5.80106	-5.15512	-5.78018	-5.54397	-5.69517	-5.41953	-5.08438	-4.89888	-5.33228	-5.41457	-5.44421	-5.18513	-5.19774	-5.14883	-5.09616	-4.9222	-4.80349	-5.77222	-5.7645	-5.76166	-6.4612	-6.17134	-5.61101
C00006614:Cyanidin|C00007395:5-Phosphoribosylglycineamide|C00004565:Kaempferol|	C05905	LC	-0.843594	-0.407327	-0.450431	-0.990716	-1.02753	-0.757355	-1.03835	-0.791797	-1.00051	-0.768567	-0.726813	-0.867158	-0.544625	-0.550972	-0.445379	-0.528309	-0.383012	-0.447656	-0.454371	-0.371643	-0.486443	-0.480197	-0.244322	-0.415928	-0.250371	-0.255471	-0.587685	-0.292238	-0.360534	-0.726653	-0.930266	-0.817869	-0.466566	-0.803541	-0.711005	-1.15911	-1.80912	-1.10244	-1.32263	-1.9301	-1.43267	-1.01239	-0.92848	-0.822707	-1.29777	-1.25969	-0.631072
C00007667:5-Methylsufinylpentyl nitrile|		LC	-4.05638	-4.15026	-4.19411	-3.94801	-3.67175	-3.95935	-4.94537	-4.79855	-4.72652	-4.80347	-4.36168	-4.47251	-3.78261	-4.21495	-3.8006	-3.99379	-4.1915	-3.89539	-2.31651	-2.3094	-2.31394	-2.52373	-1.98638	-5.52057	-5.1558	-5.02346	-5.49716	-5.22685	-5.67677	-4.36784	-5.0117	-4.71915	-4.32637	-4.4617	-4.98932	-3.71336	-3.74941	-3.24206	-4.17056	-4.13101	-3.54581	-5.70483	-5.70219	-4.48397	-5.73995	-5.66418	-5.27609
C00001431:Spermidine|	C00315	LC	-4.61397	-4.72754	-4.97734	-4.84461	-4.6386	-4.72466	-5.17428	-4.66366	-4.99105	-4.91458	-4.78765	-4.85537	-4.85683	-4.90862	-4.93799	-4.81249	-4.95211	-4.68378	-6.73771	-4.96376	-4.81407	-5.17035	-6.73923	-5.23706	-6.59292	-6.65429	-6.03261	-5.26882	-6.79978	-5.96177	-6.68977	-6.14075	-6.72147	-6.86671	-6.02299	-6.57236	-6.46014	-6.9153	-6.86254	-6.7964	-6.81535	-6.8169	-6.83585	-5.69489	-6.50104	-5.77242	-6.57593
C00001358:L-Glutamic acid|C00007459:O-Acetyl-L-serine|	C00025|C00217|C00302	LC	-4.46633	-4.35933	-4.42213	-4.59322	-4.81283	-4.5595	-5.42137	-5.34855	-4.86191	-4.56611	-4.74192	-4.76259	-4.68892	-4.83665	-4.7978	-4.92546	-5.01421	-4.78892	-5.26586	-5.42041	-4.89616	-5.13528	-5.05095	-5.32923	-5.1807	-5.07672	-5.65573	-4.93656	-4.97593	-5.16061	-5.75038	-4.73112	-5.67172	-5.18678	-5.43911	-5.10915	-6.46014	-5.14255	-5.1097	-5.03107	-5.34258	-4.76124	-4.55656	-4.95951	-5.43619	-5.70395	-4.54277
C00001378:L-Lysine|	C00739|C14075|C00047|C16440	LC	-3.44799	-3.28854	-3.73558	-3.82685	-3.63753	-3.31621	-5.74286	-6.59781	-6.58369	-5.05589	-6.55063	-6.69018	-2.39719	-2.60906	-2.45725	-1.74368	-1.46361	-1.76812	-1.32193	-1.30899	-1.59916	-1.37042	-0.841493	-6.32703	-6.59292	-6.65429	-5.05003	-6.87165	-5.31815	-6.70828	-6.68977	-4.93564	-6.72147	-6.86671	-5.80523	-0.343652	-0.535847	-0.550107	-0.265374	-0.710999	-0.603931	-0.928294	-0.984387	-0.932526	-0.982851	-1.10051	-0.476919
C00041217:Vitamin D3|	C05443	LC	-4.34037	-4.53526	-4.48866	-4.66262	-4.53151	-4.3478	-5.63749	-6.59781	-6.58369	-6.46486	-6.55063	-6.69018	-5.13769	-4.97858	-4.71441	-5.14903	-5.18357	-4.81879	-6.27989	-6.61176	-5.19354	-4.91554	-5.13364	-6.32703	-6.59292	-6.65429	-6.70618	-6.87165	-6.79978	-6.70828	-6.68977	-7.03352	-6.72147	-6.86671	-6.84256	-6.57236	-6.46014	-6.9153	-6.86254	-6.7964	-6.81535	-6.49728	-6.30081	-6.83177	-6.50104	-5.91937	-6.57593
C00007336:5-Hydroxyferulic acid|		LC	-4.82463	-4.85917	-4.90588	-4.92576	-4.72881	-4.76931	-5.04925	-4.85478	-4.8282	-5.00475	-4.88058	-4.84424	-4.93452	-5.03412	-4.76188	-4.77519	-4.97949	-4.60761	-5.02507	-4.94156	-5.02749	-4.9215	-5.0413	-4.66897	-4.85238	-4.88978	-5.08796	-4.89412	-5.06225	-5.19294	-5.19961	-5.11757	-5.12191	-5.14163	-5.02356	-4.95191	-4.57022	-4.92821	-5	-4.99253	-5.02342	-4.85526	-4.95434	-4.96436	-4.61062	-5.00316	-4.84452
C00007261:5-Dehydroepisterol|	C15780	LC	-5.54407	-5.38615	-5.92842	-5.55577	-5.91893	-5.24699	-6.10171	-6.06107	-6.53979	-5.71165	-6.08789	-5.8676	-5.92461	-5.59362	-5.05932	-5.29356	-5.30602	-5.79598	-5.6401	-5.18023	-5.64993	-5.46187	-5.04778	-6.32703	-6.59292	-6.19933	-6.70618	-6.64792	-6.18197	-6.70828	-6.68977	-6.8824	-6.72147	-6.86671	-6.84256	-6.57236	-6.46014	-6.9153	-6.86254	-6.7964	-6.81535	-6.8169	-6.21998	-6.2584	-6.50104	-6.39474	-6.00096
C00040805:25-Hydroxyvitamin D3|	C01561	LC	-4.45742	-4.32414	-4.3856	-4.60043	-4.52887	-4.46246	-4.64081	-4.26874	-4.42916	-4.42189	-4.45338	-4.11651	-4.76425	-4.79228	-4.53968	-4.78985	-4.86124	-4.58558	-6.73771	-6.19283	-4.80385	-4.76216	-4.63026	-6.32703	-6.59292	-5.83782	-6.70618	-6.87165	-6.79978	-6.70828	-6.68977	-7.03352	-6.72147	-6.86671	-6.84256	-6.57236	-6.46014	-6.9153	-6.86254	-6.7964	-6.81535	-6.8169	-6.83585	-6.83177	-6.50104	-6.72125	-6.57593
C00007654:2-Oxo-9-methylthiononanoic acid|	C17228	LC	-4.22562	-4.15207	-4.31374	-4.68179	-4.22596	-4.07196	-3.78301	-3.83561	-3.95508	-3.81	-3.68875	-3.56924	-3.54006	-3.57524	-3.76764	-3.84217	-3.55787	-3.66994	-4.00819	-3.77111	-3.72607	-3.84418	-3.6538	-4.10806	-4.37662	-4.15795	-4.54388	-4.46256	-4.33289	-4.72336	-4.65939	-4.87317	-4.83935	-4.94753	-5.02534	-5.31052	-5.35106	-5.1465	-5.37403	-5.16436	-5.16719	-4.68796	-4.6926	-4.52971	-5.13158	-4.85957	-4.31154
C00007590:"2-Methyl-6-phytyl-1,4-benzoquinone"|C00007363:delta-Tocopherol|	C14151	LC	-6.46828	-5.80637	-6.83773	-5.49894	-5.21311	-5.33147	-6.77074	-6.59781	-6.58369	-6.31043	-6.55063	-6.69018	-5.22579	-4.9357	-5.31641	-5.02096	-5.31356	-5.00065	-5.57825	-5.31652	-5.59824	-5.48399	-5.0982	-6.32703	-6.50514	-6.42222	-6.63284	-6.87165	-6.77519	-6.70828	-6.68977	-7.03352	-6.72147	-6.86671	-6.84256	-6.57236	-6.46014	-6.9153	-6.54165	-6.7964	-6.81535	-6.23386	-6.28225	-5.93394	-6.03859	-6.47177	-5.75115
C00007313:UDP|	C00015	LC	-5.09392	-5.03166	-4.91491	-5.03955	-4.85036	-4.47886	-5.4651	-5.00451	-5.2146	-5.21074	-5.13298	-4.96749	-5.45928	-5.63738	-5.35319	-5.30267	-5.60834	-5.13126	-6.04595	-5.58996	-5.69467	-5.17775	-5.75181	-4.88789	-4.69628	-4.99592	-5.09409	-4.98103	-4.99163	-4.96952	-4.87877	-5.04358	-4.71575	-4.98787	-4.74258	-4.74172	-4.57498	-4.78285	-4.57972	-4.3938	-4.93141	-4.75148	-4.82424	-5.10791	-5.00177	-4.97055	-4.68534
C00007646:2-(3'-Methylthio)propylmalic acid|C00007498:L-Cystathionine|	C02291|C00542	LC	-5.26761	-5.15056	-5.61324	-5.6751	-4.80209	-5.68495	-6.4212	-6.52194	-6.52496	-5.19483	-5.29181	-5.9145	-5.84639	-6.18904	-4.85164	-5.8476	-6.30768	-5.41038	-6.30147	-6.12624	-5.52111	-5.54691	-6.1992	-5.75327	-5.2346	-5.77772	-6.03449	-5.17881	-5.98245	-5.72883	-6.65616	-5.29017	-6.28342	-6.05389	-6.7667	-6.40826	-5.29419	-6.9153	-6.42498	-6.159	-6.11717	-6.76587	-5.72666	-6.68642	-6.50104	-6.34698	-6.57593
Toma37:Hydroxy-dehydrotomatine|		LC	-4.27906	-4.22461	-4.14934	-3.96804	-4.10738	-3.89216	-4.0691	-3.67335	-3.79498	-3.45816	-3.49848	-3.42472	-4.2167	-4.09652	-4.23448	-4.59138	-4.61158	-4.09521	-4.75075	-4.50723	-4.32716	-4.74573	-4.55263	-4.41885	-4.2293	-4.128	-4.62455	-4.14421	-4.53665	-4.58895	-4.67743	-5.06953	-6.72147	-4.69067	-4.71079	-5.16527	-5.79829	-5.61321	-5.2433	-5.80978	-5.49195	-4.95734	-4.79434	-4.61994	-5.49824	-4.87353	-4.35108
Toma76:Unidentified glycoalkaloid (UGA) 5|		LC	-2.5257	-2.16595	-2.44755	-2.77221	-2.55186	-2.40513	-3.07343	-2.90217	-3.04672	-2.96211	-2.86866	-2.82842	-2.7357	-2.82253	-2.43213	-2.6102	-2.70744	-2.52837	-2.89385	-2.83605	-2.60205	-2.52704	-2.48186	-3.31099	-3.04988	-2.93461	-3.43675	-2.93444	-3.30152	-2.98959	-3.23179	-3.3851	-3.34241	-3.37581	-3.1383	-3.26151	-3.51211	-3.42287	-3.40466	-3.45589	-3.46521	-3.32926	-3.24789	-3.29481	-3.59269	-3.52228	-2.89715
Toma77:Unidentified glycoalkaloid (UGA) 6|		LC	-3.11382	-3.13993	-3.26973	-3.17899	-2.76931	-2.81182	-2.7487	-2.96026	-3.42193	-3.17455	-2.72558	-2.46658	-3.15754	-3.47878	-3.46444	-2.85184	-2.5813	-2.50777	-3.05112	-3.10166	-2.88899	-3.32389	-2.47706	-1.80971	-1.56648	-1.41918	-2.05436	-1.93259	-2.25909	-2.42527	-2.75564	-2.91248	-2.51795	-6.86671	-2.57043	-2.84565	-3.62114	-3.20121	-3.30325	-3.73493	-6.81535	-2.97843	-2.64167	-2.31801	-2.70277	-2.61011	-2.10294
Toma69:Tomatidine tetrahexoside|		LC	-3.55451	-2.78561	-4.33255	-3.77042	-2.4597	-3.71045	-2.67881	-6.59781	-2.48609	-2.35294	-3.25767	-6.69018	-6.51584	-6.68474	-2.95653	-2.64574	-3.17873	-2.6553	-3.61324	-3.45738	-3.0391	-6.7759	-2.53816	-3.09683	-3.23597	-3.03779	-3.32198	-3.38526	-3.28517	-3.99635	-3.99737	-3.87868	-3.73306	-3.78009	-3.71011	-3.94359	-3.987	-4.16214	-3.96131	-4.0638	-4.02905	-3.41871	-3.30447	-3.49111	-6.50104	-6.72125	-3.18118
Toma33:Hydroxy-dehydrotomatidine trihexoside + deoxyhexose|Toma19:Dehydrotomatidine tetrahexoside|		LC	-4.28912	-4.34207	-4.25199	-4.67603	-4.69344	-4.33448	-4.48091	-4.14522	-4.29691	-4.2193	-4.12863	-4.09357	-4.40668	-4.37096	-4.48123	-4.46362	-4.34736	-4.32807	-4.62437	-4.58058	-4.22304	-4.26193	-4.02307	-3.9342	-3.57783	-3.54706	-4.01579	-3.45644	-3.65709	-3.17559	-3.56607	-3.56462	-3.53545	-3.63849	-3.36907	-3.7212	-3.96455	-3.95765	-3.86266	-3.91605	-3.69634	-4.43528	-4.48823	-4.35408	-4.66411	-4.6524	-4.02156
Toma03:Acetoxy-dehydrotomatine|		LC	-2.91245	-2.73291	-3.10462	-3.35141	-3.26296	-3.10195	-3.53469	-3.2785	-3.63274	-3.34638	-3.06957	-2.98681	-3.27065	-3.20955	-2.92873	-3.30169	-3.18935	-3.22007	-3.66446	-3.58582	-3.1585	-3.0945	-3.09643	-3.25078	-3.10894	-2.97761	-3.40113	-3.34935	-3.32303	-2.84641	-3.05581	-3.38795	-3.41091	-3.53995	-3.37161	-3.52911	-3.83647	-3.78955	-3.30533	-3.42795	-3.55866	-3.53378	-3.65948	-3.63299	-3.62398	-3.77084	-3.24186
Toma11:Acetoxy-hydroxytomatine isomer #1|		LC	-4.3005	-4.06546	-4.27676	-4.72879	-4.36013	-4.06344	-4.40249	-4.21858	-4.4095	-4.20278	-4.16284	-4.21202	-2.78828	-3.02103	-2.81627	-2.65473	-2.39581	-2.47997	-2.38177	-2.49654	-2.34539	-2.40632	-1.92887	-2.77893	-2.60251	-2.5252	-2.87857	-2.64779	-2.76044	-2.66189	-2.49911	-2.79625	-2.69666	-2.83727	-2.75141	-2.34451	-3.07665	-2.83675	-2.62909	-3.2528	-2.90366	-2.82216	-2.8105	-2.80244	-3.25569	-2.93862	-2.54901
Toma66:Tomatidine dihexoside dipentoside isomer #1|		LC	-2.10995	-1.88168	-2.01427	-2.3648	-2.28075	-1.97198	-2.2667	-1.99219	-2.46025	-2.21973	-2.04454	-2.16872	-2.02631	-2.05129	-1.85305	-1.88615	-1.65758	-1.7705	-1.97884	-1.9107	-1.8667	-1.81566	-1.40904	-2.04548	-1.78557	-1.6188	-2.08219	-1.78576	-1.83066	-1.66526	-1.64698	-1.68238	-1.69981	-1.77438	-1.66106	-1.78714	-2.00898	-1.99513	-1.80331	-2.08735	-1.86714	-2.21925	-2.16965	-2.39327	-2.53928	-2.47088	-1.89845
Toma22:Dehydrotomatine isomer #3|Toma23:Dehydrotomatine isomer #4|Toma24:Dehydrotomatine isomer #5|Toma20:Dehydrotomatine isomer #1|Toma21:Dehydrotomatine isomer #2|		LC	1.27572	1.36764	1.34265	1.04854	1.15868	1.33669	1.28077	1.54723	1.28433	1.50914	1.66899	1.61714	1.28172	1.3137	1.41878	1.34809	1.5126	1.64984	1.14278	1.22128	1.44811	1.48668	1.83451	1.71935	2.11395	2.23755	1.68641	2.11307	1.91867	2.17883	2.07647	2.00949	2.12661	2.01894	2.18383	1.72392	1.38325	1.50088	1.55862	1.50446	1.63712	1.24495	1.13273	1.03136	1.04253	1.09485	1.69727
Toma26:Didehydrotomatine|		LC	-6.14323	-6.03648	-6.0009	-6.57797	-6.36197	-6.14841	-6.57152	-6.28283	-6.58369	-6.27879	-6.18326	-6.54577	-6.26327	-6.24094	-6.43694	-6.338	-6.09244	-5.89458	-6.26546	-6.23619	-5.84565	-5.83203	-5.66292	-6.16925	-5.70851	-5.06497	-5.93905	-5.43017	-5.65433	-5.06844	-5.09482	-5.1956	-5.19788	-5.15093	-5.26144	-5.27248	-5.91866	-5.492	-5.32449	-5.73133	-5.30874	-6.48354	-6.56735	-6.54446	-6.50104	-6.52807	-5.98884
Toma80:Unidentified glycoalkaloid (UGA) 9|		LC	-6.11214	-5.50874	-6.0026	-6.42776	-6.36197	-5.95063	-6.08727	-5.94464	-6.2687	-6.10323	-5.72363	-5.64194	-6.51584	-6.64048	-6.79776	-6.13984	-6.44923	-6.36312	-6.32845	-6.40947	-6.50924	-6.17891	-6.73923	-4.03545	-3.57367	-3.61787	-4.17882	-3.66284	-3.67066	-3.68505	-3.82599	-3.90166	-3.70582	-3.89226	-3.80662	-3.93662	-4.19246	-4.01003	-3.58532	-4.17674	-3.85089	-4.4377	-4.4521	-4.32033	-4.19253	-4.36597	-3.75429
Toma75:Unidentified glycoalkaloid (UGA) 4|		LC	-3.14863	-2.87626	-3.05782	-3.37797	-3.14861	-2.93677	-3.46047	-3.13411	-3.57727	-2.96772	-3.03322	-3.00041	-3.23516	-3.10493	-3.08403	-3.05071	-3.25281	-2.99547	-3.46661	-3.16466	-2.85457	-3.12917	-2.85958	-3.29923	-3.0697	-2.85072	-3.47668	-2.98758	-3.13109	-2.95927	-3.05754	-3.27034	-3.16663	-3.42342	-3.13379	-3.37754	-3.54097	-3.71202	-3.39439	-3.46111	-3.40225	-3.32712	-3.35499	-3.70981	-3.7406	-3.59673	-2.99009
Pyridine, 2-hydroxy- (1TMS)	C02502	GC	31.6825	33.0629	32.8229	33.1883	33.2254	32.8796	33.4757	32.4966	33.1239	32.764	31.9028	32.0726	32.7298	33.2213	32.4743	32.4966	32.9248	32.6406	32.4367	32.3739	32.8616	32.8934	32.9963	32.2533	32.6597	31.4019	32.2398	31.7337	32.1494	32.0426	32.5583	31.889	32.2223	32.281	32.2616	33.1455	33.0826	32.5921	32.8551	32.488	33.1425	33.3167	33.2517	33.634	34.4095	32.9223	33.4277
Glycolic acid (2TMS)	C03547|C00160	GC	29.932	29.3453	29.7932	29.7026	29.9479	28.893	28.8424	28.9783	29.2259	29.7194	29.6514	29.6465	27.4809	27.654	29.609	28.7372	28.4184	29.0726	28.9598	29.3501	29.1591	28.3434	27.5306	29.2245	28.7968	29.35	29.4819	29.3304	29.5304	29.8428	29.6401	29.6543	29.5604	30.1145	29.1292	29.8265	29.4313	29.175	29.9601	29.285	29.7019	28.6441	29.573	29.4906	30.0625	29.8866	29.5331
Alanine (2TMS)	C00041|C00133|C01401	GC	37.4145	37.3125	37.5475	37.6857	38.3573	37.4069	36.9121	36.5863	37.4058	37.4272	36.8651	36.5569	36.2426	34.8615	36.2292	35.2529	34.8358	35.7947	34.4706	35.3451	35.4084	35.3543	35.2365	37.3255	37.4762	37.3528	37.0806	36.9141	36.5822	36.9936	36.672	36.3806	36.7079	36.5425	36.8751	37.6728	37.3548	36.8232	38.0472	37.0196	37.8807	37.9033	37.6596	37.7714	38.4884	37.6782	37.7282
Hydroxylamine (3TMS)	C11598|C00192	GC	31.7814	31.0032	31.8435	31.7141	30.5448	31.461	30.5317	31.6179	30.7806	31.4799	32.1511	31.9394	30.8436	30.0079	32.0804	31.474	30.5733	31.3685	31.4236	31.705	31.2029	31.0949	30.4967	31.4272	30.9833	31.9706	31.6313	31.5637	31.7017	31.3819	31.4148	32.0036	31.6109	31.4337	31.5365	31.216	31.2474	31.0586	31.5367	31.5597	31.2939	30.6244	31.156	30.8857	30.1364	31.4004	31.4661
tert-Butylpentamethyldisiloxane		GC	31.5757	31.1477	31.6081	30.6531	31.1015	30.3815	31.519	30.6793	31.5141	30.3911	30.7375	30.6759	30.9923	31.2366	30.405	30.8353	31.4055	30.868	32.1147	31.5722	31.5155	31.6237	32.0323	29.0438	29.7818	29.5575	29.8268	29.6948	29.9569	30.5311	32.2024	31.682	31.6446	31.4344	31.9249	30.8003	30.807	30.5387	30.1331	31.0154	30.9051	31.0819	29.8891	30.0002	28.3641	30.0129	30.1391
Dihydrouracil_2TMS	C00429|C03919	GC	32.5174	32.5723	33.1553	32.3557	32.389	31.6649	33.0736	32.0298	32.6322	32.5086	31.6859	31.8103	33.2136	33.4594	33.0514	33.0072	33.1468	33.2009	32.6261	33.2068	32.9729	33.1407	33.9059	30.2558	30.2381	30.8145	31.0117	30.5635	30.6384	32.731	34.4675	33.8068	33.716	33.4322	33.9628	33.8125	33.7063	33.4068	32.9732	33.2512	33.463	34.6778	33.7882	34.056	34.548	33.5503	33.7625
Valine, DL- (2TMS)	C06417|C16436|C00183	GC	36.2252	36.3569	36.5525	36.708	37.0187	36.3654	35.4278	35.3727	35.8448	35.8108	35.6452	35.4732	35.7887	35.7912	35.9927	35.5649	35.3141	35.5965	36.0716	36.0158	36.0001	35.9845	35.8773	35.4253	35.5185	35.7014	35.4959	35.2076	35.1494	36.1092	35.1426	35.4888	35.7397	35.9607	35.563	36.3471	35.9661	35.2232	36.7348	35.9318	36.4794	36.6639	36.5927	36.9186	37.2421	36.7504	37.0078
Urea (2TMS)	C00086	GC	18.1325	22.7264	17.6969	18.1717	15.0346	19.4359	21.4103	17.5564	20.2397	19.8054	20.0247	18.7604	19.3653	19.6075	14.4477	17.2766	21.8209	18.2614	21.9838	19.8271	20.0852	20.8384	18.2534	16.6734	20.6032	19.4285	17.6528	20.5456	21.4104	21.5147	18.6672	18.5692	20.6875	24.1504	20.129	16.3474	16.2765	12.4346	27.6152	27.5248	25.7762	21.2557	19.8781	21.9454	25.5034	19.1069	19.8394
Glycerol (3TMS)	C00116|D00028	GC	33.1319	33.1412	33.1439	33.2126	33.0831	33.2004	33.1727	33.1553	33.1046	33.1928	33.2176	33.3497	32.9292	33.0339	33.1283	33.1834	33.3583	33.1299	33.1397	32.9564	32.8867	33.1764	33.0891	33.4469	33.6779	33.5379	33.792	33.711	33.6694	33.6955	33.4982	33.5631	33.4242	33.5226	33.4127	33.6881	33.8151	33.8777	33.7512	33.8394	33.8148	33.6608	33.5369	33.5913	33.1185	33.3941	33.7619
Phosphoric acid (3TMS)	C00009	GC	41.6838	41.7789	41.6666	41.6519	41.9176	41.7899	41.4214	41.7251	41.7783	41.7275	41.6549	41.5066	41.7965	41.9129	41.8683	41.7903	41.5428	41.455	39.0904	41.6209	41.7829	41.7	41.3446	41.2608	41.0016	41.1133	40.9792	41.1116	40.9942	40.9152	40.359	40.4967	40.9849	41.1324	40.9809	40.548	40.5064	40.2439	39.6182	39.4386	40.3888	40.2345	41.2734	41.1684	41.3286	41.3516	41.1083
Leucine, DL- (2TMS)	C16439|C00123|C01570	GC	31.5963	33.9384	32.2793	34.1418	32.793	33.8121	32.6219	33.3911	32.6649	33.618	28.179	29.5393	33.0164	32.0441	33.0547	32.7762	32.7658	32.8478	34.382	32.475	34.1321	32.8532	34.7575	34.0616	34.3822	34.8721	34.3805	34.2398	34.2409	36.1677	34.2339	35.3478	35.3287	36.5671	35.1478	36.3371	35.8331	35.501	36.5164	36.1469	36.5456	34.5644	34.3307	34.486	32.9792	34.2003	34.6125
Isoleucine (2TMS)	C16434|C00407|C06418	GC	34.3414	33.5096	33.9216	33.6334	34.069	33.5341	32.5548	32.913	33.1737	33.2087	33.0476	32.965	32.9376	32.7824	32.9052	32.7613	32.2862	32.4718	34.6117	34.3272	34.0232	34.2449	34.2808	32.6269	32.6851	33.1698	33.1302	33.1333	33.083	34.6296	33.1181	34.3277	34.1657	34.5695	34.0792	34.7769	33.9434	33.4684	35.0218	34.3496	34.7682	34.0374	34.1155	34.4208	34.3682	34.4477	34.4665
Glycine (3TMS)	D00011|C00037	GC	33.4364	34.2143	34.0717	33.4362	34.7223	32.6163	34.4499	33.3882	34.9156	32.7993	31.8626	33.9517	32.8567	33.544	33.2107	33.0248	32.9752	33.0994	32.3693	31.5146	31.985	32.948	32.0963	33.6453	33.976	34.4176	34.264	33.6128	33.5419	35.1906	33.9669	34.8213	34.9044	35.1533	34.6727	35.3091	34.8616	34.7397	35.7652	35.0133	35.4628	34.1583	34.1563	34.1382	34.2428	34.2503	34.2564
Glyceric acid, DL- (3TMS)	C00258	GC	33.3982	32.9671	33.0354	32.843	34.0631	32.935	33.2028	30.8989	32.8011	32.1071	32.4178	32.0594	30.6651	31.3081	31.539	30.8178	30.5376	30.9064	30.1025	30.2464	30.7356	30.9216	29.1003	29.5684	30.175	29.9354	30.0235	30.2559	30.1252	30.2593	29.28	30.2529	30.3868	30.4119	30.1627	31.1701	30.9777	30.6112	31.1472	30.8804	30.7338	30.7868	30.8825	31.0284	31.1951	31.4607	31.0356
Uracil (2TMS)	C00106|D00027	GC	31.2647	29.9159	30.0412	29.9738	31.5251	31.0209	28.8262	29.4648	29.8364	29.749	30.4527	29.3791	30.4458	28.727	30.0049	29.2441	29.0206	30.7805	30.0007	29.5582	29.9524	29.7826	31.0261	29.3248	30.0204	28.9959	29.2481	29.5766	28.7155	30.0296	28.2295	29.1697	29.9985	29.3716	30.2652	29.9864	29.8813	30.4729	30.2167	30.222	29.2199	29.2417	30.9425	29.8021	30.4389	30.311	30.2503
Lumichrome (2MEOX)	C01727	GC	38.4967	38.5391	38.6518	39.1534	38.8489	38.5973	38.0578	38.2838	37.8061	38.0837	38.3625	38.2107	37.7721	38.0879	37.7058	37.8082	38.3544	37.8802	38.5025	38.3501	38.3738	38.4277	38.4632	36.9507	36.9163	37.2897	37.2013	37.116	37.3613	37.2262	37.7801	37.2802	37.1457	37.2614	37.1222	37.5767	37.8026	36.8575	37.5163	37.1891	37.619	37.8465	36.7553	37.677	37.2257	36.8902	37.7601
Itaconic acid (2TMS)	C00490	GC	35.53	35.4634	35.8565	35.0783	35.4628	36.5921	35.4594	34.8004	35.5652	34.9879	36.2363	34.7582	35.7481	34.933	36.1834	35.3981	34.4426	36.2391	34.6498	35.6358	35.334	34.9119	35.4585	33.9615	35.7265	34.2301	34.2234	35.8635	34.8643	34.6677	35.4124	34.8084	34.7895	34.9329	35.3906	35.199	35.1645	35.2779	34.7037	35.793	34.8896	35.0166	35.6515	35.0928	35.463	35.6643	34.8235
Fumaric acid (2TMS)	C00122|D02308	GC	34.5182	34.6338	34.4461	34.2324	34.3461	35.3103	34.8024	34.0759	34.7232	34.2166	34.3977	34.1776	34.7408	34.1	34.9466	34.5886	34.8426	35.3297	33.7391	34.6459	34.1755	33.7366	34.1459	33.5836	34.5448	33.785	33.7412	34.0901	34.4133	34.4861	35.1142	34.2904	34.5018	34.6261	34.7858	35.1499	34.9829	35.1381	34.4521	35.3276	34.7314	34.4277	35.1433	34.3684	34.8746	34.7996	34.466
Serine, DL- (3TMS)	C00740|C00716|C00065	GC	40.3212	40.3933	40.5844	40.443	40.1441	40.1278	39.8046	39.1643	40.0576	39.7462	39.1719	39.2523	38.5409	38.6809	38.3549	38.3434	38.3546	38.0868	38.6042	38.4909	38.5016	38.5744	38.2998	38.9467	39.0571	39.3236	39.1415	38.9694	38.6232	39.1841	38.8643	39.3631	39.5188	39.3827	39.7292	40.2657	40.0816	39.7379	40.2499	39.8838	40.2078	39.8294	39.9227	40.0133	38.9021	39.8827	39.9302
Alanine, 3-cyano-, L- (2TMS)	C02512	GC	31.8786	31.7028	32.8324	32.5463	32.464	32.4579	30.8749	31.2512	31.2233	31.2107	32.2659	31.1817	31.8565	32.3238	32.4435	31.7939	31.6258	31.1739	33.2938	32.3951	32.4401	32.5009	31.9108	30.7281	30.8113	30.7771	30.7418	30.9903	30.7019	31.6504	31.0979	31.4853	31.21	31.2707	31.4226	31.7105	31.5416	31.0598	32.0747	31.88	32.0465	30.8295	30.6377	31.621	29.8094	30.579	31.2582
Pipecolic acid (2TMS)	C00408	GC	30.1698	31.317	30.7182	31.1486	31.4662	31.1383	31.1947	30.6689	31.7001	30.9172	30.8548	30.2632	33.5894	33.2071	32.9876	33.6043	34.0534	33.9483	31.5334	31.7795	31.8468	32.9355	32.4957	33.4148	32.8628	33.1898	32.6013	31.8528	32.1352	32.215	31.5999	29.7781	31.2362	31.9541	30.8517	31.983	32.3078	32.2314	33.7182	32.3565	33.52	35.055	34.6534	34.9666	36.3159	34.7068	34.3912
Threonine, DL- (3TMS)	C12317|C05519|C00820|C00188	GC	36.7648	37.0699	37.0948	37.2145	37.5633	36.8383	36.4	36.0782	36.6596	36.6821	36.1894	36.0896	35.3307	35.4681	35.6985	35.2511	34.9885	35.097	35.8144	35.7762	36.0168	35.9069	35.8364	36.1178	36.104	36.3636	35.9908	35.8221	35.6921	36.8975	35.9914	36.2334	36.731	36.9159	36.7182	37.5727	37.1897	36.3883	37.7489	36.7894	37.548	36.7948	36.6929	36.9279	37.2254	36.6844	36.7264
Fumaric acid, 2-methyl- (2TMS)	C01732	GC	31.3346	31.4833	31.4557	30.9741	30.7664	32.3768	31.3378	30.7338	31.2101	30.7139	31.3177	30.9466	31.1902	30.1399	31.5234	31.2809	30.7066	31.8886	30.8463	31.1547	30.9519	30.4474	30.6224	29.8265	31.0144	30.3071	30.3372	30.521	31.1423	30.8158	31.1903	30.7548	31.0488	31.2902	31.4581	31.2905	31.1084	31.3295	30.6399	31.8091	30.9021	30.4069	31.5132	30.5275	31.4881	31.4122	31.019
Glutaric acid (2TMS)	C00489	GC	24.2709	23.7472	24.269	24.3822	26.671	25.157	22.1625	19.9421	24.0961	22.4966	22.7974	21.0197	18.0634	18.8838	21.9394	20.3927	22.1625	23.3412	16.6696	17.5184	24.1134	16.4607	NA	17.1133	13.3777	17.6614	14.264	11.0259	20.2769	20.6657	NA	17.148	20.4636	21.7996	22.0026	22.4799	22.5731	21.14	24.0956	21.7957	22.3852	22.3406	25.3718	26.0443	27.7256	26.2007	24.4548
Alanine, beta- (3TMS)	C00099|D07561	GC	38.2375	38.2155	38.4173	37.9752	38.8514	37.7786	37.8479	37.259	38.1164	38.2247	37.3775	37.6947	38.3631	38.5601	38.4855	38.517	38.3254	38.2913	36.9229	37.2195	36.9854	36.7752	36.1962	38.287	38.5806	38.5981	38.4758	38.308	38.1191	37.5274	37.2863	37.0344	37.2239	37.6317	37.5467	37.3078	36.8415	37.076	36.8928	37.0578	37.1292	38.9764	38.4121	38.8014	39.1855	38.5966	38.9325
Arabinose, D- (1MEOX) (4TMS)	C00216|C02479|C00259|C11476	GC	32.2138	32.7726	32.1409	33.006	32.9742	32.6874	31.4554	31.7687	32.0794	31.8505	30.0974	31.5732	31.7575	31.8789	31.9419	31.6872	31.7134	31.8333	31.9862	31.7176	31.8123	31.658	31.391	30.0901	30.2055	30.2787	30.3765	30.3132	30.5326	30.8559	31.1943	30.344	30.8174	31.5996	30.6409	31.5334	31.4852	31.1799	31.2867	31.258	30.8414	30.9617	30.8108	31.7412	30.9833	31.4059	31.3223
Asparagine, DL- (3TMS)	C00152|C01905	GC	37.0539	37.0163	37.5139	38.2187	38.5709	37.6174	35.4746	35.765	36.2724	36.0384	36.2804	35.883	37.5679	38.4744	37.5569	36.7241	36.69	35.8443	38.2752	37.603	37.8463	37.0446	36.8051	34.2643	33.1413	33.8255	33.012	33.3297	33.132	36.1164	34.2459	35.9167	35.4823	35.9284	35.575	36.7054	35.4089	34.4554	37.2874	36.3135	36.7516	35.7522	35.7066	36.8231	36.6438	35.5732	36.0502
Suberic acid (2TMS)	C08278	GC	15.58	16.8588	16.8534	19.3422	19.0946	19.7818	19.6003	15.8892	14.3208	18.5342	14.5762	13.2181	16.7643	17.1313	18.427	13.2277	13.5278	14.0052	15.1386	17.3203	15.7358	17.2159	15.8063	15.3687	16.3651	16.772	11.9988	14.6614	14.2532	12.7918	16.1163	16.7336	17.5493	15.8429	15.3368	17.9818	15.8126	16.4692	16.9998	NA	16.1043	17.3438	18.1176	17.611	16.7405	17.8896	16.2391
Aconitic acid, cis- (3TMS)	C00417|C02341	GC	33.6936	33.2102	33.8423	33.1741	33.4875	34.0101	33.0433	32.8751	33.6345	33.0719	33.5045	32.8613	33.6268	33.3743	34.1035	33.2257	32.9088	33.2654	32.6777	33.0011	33.4651	33.5487	32.9859	32.485	33.3797	32.471	32.4797	33.1541	32.6312	32.5481	31.9531	32.7808	32.4754	32.53	33.058	32.598	32.8568	33.0204	33.2252	33.1564	32.9844	32.7638	33.4051	33.6008	34.2248	33.881	33.4566
Glutamine, DL- (3TMS)	C00819|C00064|C00303	GC	40.4401	40.4927	40.4395	40.8123	41.195	40.8681	40.2616	39.9353	40.4783	40.3201	40.2835	40.0286	39.0654	38.9442	38.902	39.0239	39.1376	38.7331	38.6935	38.9666	38.9567	38.3158	38.1922	38.7335	39.0361	39.2777	39.0729	38.8027	38.9132	40.4624	39.4693	40.8565	40.5034	40.4392	40.6382	41.3274	40.1476	39.4031	41.5241	40.5978	40.9384	40.0816	39.7055	40.7198	40.3935	39.9859	40.1797
Shikimic acid (4TMS)	C00493	GC	38.7765	38.6747	38.7254	38.3308	38.6213	38.3672	39.1906	38.5312	38.6828	39.0073	38.7905	38.4847	36.4529	35.9981	36.6305	37.0569	37.0905	36.9638	36.3602	36.5434	36.4985	36.5699	36.6173	38.5912	39.5818	39.4193	39.4411	39.2088	38.9992	39.0392	38.8728	39.2908	38.7874	38.7292	39.0337	39.3155	38.8012	38.7285	39.0056	39.065	39.2223	39.9939	39.9658	40.3058	39.1524	40.1705	40.089
Isocitric acid, DL- (4TMS)	C00451|C00311|C04617	GC	35.1211	36.6073	35.6252	36.0285	35.2645	36.0912	36.1825	35.929	35.5059	35.555	35.4266	35.7339	36.0911	35.6412	35.835	35.9179	36.3602	35.5035	35.9336	36.0279	36.0896	36.426	36.0702	36.1465	35.6329	36.4741	36.0427	35.9777	35.8686	36.0327	36.3996	36.4848	35.6897	36.6139	35.5616	35.6552	36.0568	36.0008	36.1665	35.9503	36.2227	35.7475	36.1676	35.8987	37.1279	36.0942	36.1096
Citric acid (4TMS)	C00158|C12649|D00037	GC	37.7663	38.102	37.3159	37.3261	37.9192	38.3565	37.2419	37.7345	37.6678	38.063	39.1203	37.453	37.6003	37.5407	37.0562	38.2392	37.4842	38.7392	38.8585	39.0034	39.084	37.8795	39.3806	37.5848	39.4485	37.8185	38.8355	39.3937	39.2048	38.2407	39.6118	40.3744	39.4622	38.5584	39.455	39.6304	39.63	38.0425	40.209	39.6401	39.1732	39.4844	37.861	37.5561	40.3428	37.933	38.1583
Ornithine, DL- (4TMS)	C01602|C00515|C00077	GC	30.3185	29.9737	30.5834	30.5294	30.6768	29.7887	29.8235	29.3973	30.0462	30.2293	29.0433	29.6103	27.0885	27.7979	25.799	26.6975	28.1295	26.0123	27.2589	26.0965	26.5104	27.5729	27.0552	27.8428	27.5483	28.5714	28.1079	27.0877	27.3749	30.1334	28.2506	30.3042	29.6957	29.7182	29.5343	31.2309	29.8736	29.4094	30.9665	30.2243	30.6541	29.0094	29.6946	30.4346	28.9505	29.7934	29.9411
Quinic acid, D(-)- (5TMS)	C00296	GC	41.1397	41.3317	41.0819	41.045	41.4614	41.2859	40.3636	41.1034	40.5637	41.0581	40.9537	41.1396	40.7906	41.299	40.3052	41.0008	41.2584	40.644	40.795	41.025	40.9847	41.0791	41.0059	40.3533	41.0702	40.3055	40.9676	40.2585	41.1353	40.1415	41.2077	41.2092	41.0548	40.0382	41.1911	40.8244	41.0299	40.6114	40.5467	41.1457	40.6345	40.9661	41.0857	40.9784	40.4805	41.2803	41.3004
Fructose, D- (1MEOX) (5TMS)	C02336|C01719|C10906|C00095|C01496	GC	40.1614	40.2384	40.3138	40.2149	40.778	39.8416	41.1768	40.6271	41.0526	40.7762	40.8123	41.107	38.5455	38.7047	37.3381	38.6621	39.0205	39.2944	38.1046	37.8935	37.4632	37.877	37.8697	39.4039	39.6395	39.7195	39.8606	39.6329	39.725	40.3787	40.1524	40.4541	40.8279	40.2518	40.7685	41.3812	41.1534	40.6034	41.1892	40.9343	41.021	40.1825	39.8137	40.287	40.1698	39.6661	40.0203
Mannose, D- (1MEOX) (5TMS)	C00159|C00936	GC	29.4682	29.3864	31.463	31.3851	29.7302	29.1134	34.2537	32.1636	32.3516	34.8882	32.6189	33.2558	4.98251	-0.780745	6.96631	3.12285	1.15632	3.92427	6.61848	5.1812	0.433537	11.5596	11.7896	14.097	19.7668	22.9028	15.1296	13.3235	5.82286	24.6811	16.726	25.4055	25.3757	25.2977	24.1704	27.9077	24.2286	24.3484	27.7613	23.8333	26.5722	10.2294	8.40198	8.97447	7.56036	6.30037	8.19216
D-(+)-Gluconic acid delta-lactone (1MEOX) (4TMS)	C00198	GC	31.2953	30.7016	31.282	30.7518	29.9759	30.4999	28.5499	28.9743	28.6538	29.1044	27.838	28.5133	30.0465	30.2192	30.6717	29.5776	30.114	29.894	30.0201	30.2507	29.7887	30.339	29.9878	30.9561	31.3748	30.8229	30.9429	31.0137	30.8468	29.1476	31.1663	30.4407	29.4695	27.7333	29.7797	29.7231	30.488	29.2238	28.2257	29.082	28.5432	30.3417	31.2394	30.4044	31.6948	31.3293	31.2398
Lysine (4TMS)	C00739|C14075|C00047|C16440	GC	33.3254	33.1173	33.4739	33.446	33.8652	33.4247	32.8981	32.978	33.2687	32.9568	33.2625	33.0393	32.9778	32.8903	33.1291	32.8859	32.3472	33.2324	35.6788	34.8347	34.7405	34.4681	35.172	32.0793	32.4777	32.6496	32.3532	32.4986	32.1372	34.8984	32.8437	34.7814	34.5176	34.9015	34.2164	35.457	33.927	33.3535	35.9197	35.0302	35.2845	33.2587	33.0091	33.5123	33.1995	33.2772	33.0917
Glucuronic acid, D- (1MEOX) (5TMS)	C16245|C00191|C08350	GC	38.5083	38.454	38.757	37.8196	38.1038	37.5052	40.0781	38.7878	39.1479	39.246	38.915	39.1997	34.3786	33.8602	33.7335	35.9676	35.7434	35.8664	33.5024	33.6643	31.4388	32.7311	34.0686	38.9679	40.2973	39.9293	40.0827	39.1904	40.4946	39.4881	40.029	40.4652	39.5679	38.6891	39.8471	40.4975	39.7846	38.3663	40.1829	39.7164	40.4154	40.3104	40.05	40.6569	38.9472	39.9018	39.8741
Tyrosine, DL- (3TMS)	C00082|C01536|C06420	GC	32.3598	31.9407	32.2419	32.6416	33.0214	32.722	30.8976	31.1142	31.4034	31.2222	31.5455	31.4409	33.6805	33.3452	33.4253	32.6226	32.5299	32.7629	36.2183	35.112	35.6046	35.2886	35.2957	31.0033	30.8929	30.7173	30.3353	31.068	30.2011	32.0471	30.5137	31.3955	32.1545	32.352	31.309	32.6885	32.0265	31.6683	33.5849	32.7583	32.8912	32.328	32.7043	33.2019	33.1158	32.8211	33.2465
Galacturonic acid, D- (1MEOX) (5TMS)	C08348|C00333	GC	32.6551	33.0604	33.072	32.3386	31.8625	33.4009	33.6322	34.168	33.8154	30.3108	34.6592	34.4346	32.4769	31.7256	29.1783	31.3616	30.9819	32.0612	31.0846	30.099	22.7978	31.8331	31.0391	31.4018	31.0562	30.4399	30.9191	30.3257	31.0863	32.1967	31.8687	32.9373	33.3794	27.6223	32.994	32.7359	24.7516	32.7481	34.5108	33.0045	32.7546	31.8209	32.1697	31.9662	30.8808	29.9516	31.8806
Galactonic acid (6TMS)	C00880	GC	38.6574	38.5077	38.7369	38.56	38.8527	38.3837	37.8432	37.8088	38.2761	38.2302	38.1247	37.7565	37.9	37.782	37.8904	37.9504	37.8079	38.1097	37.1748	37.2746	37.6372	37.5204	37.377	37.4283	37.4851	37.561	37.4397	37.3767	37.2905	37.6245	37.0652	37.3992	37.4863	37.7742	37.432	37.988	37.8037	37.6027	38.0727	37.5825	37.8094	37.7469	38.0246	38.2051	38.2755	38.1904	37.8123
Gluconic acid (6TMS)	D05862|C00257	GC	34.9477	34.7966	35.1265	35.0944	35.4415	34.9551	34.9121	34.7648	35.0949	35.114	35.0189	34.8642	34.8426	34.7612	34.9042	34.5836	34.3565	34.5588	34.1013	34.232	34.5774	34.2508	34.0751	34.4936	34.4928	34.6064	34.4684	34.5304	34.3978	34.3717	34.2655	34.3248	34.5416	34.7289	34.548	34.4794	34.5486	34.1863	34.5905	34.283	34.8459	34.6943	34.9141	35.0017	35.3954	35.0577	34.982
Saccharic acid (6TMS)	C00818|C00767	GC	39.0074	39.0015	38.4759	38.9619	39.0461	39.0569	37.7468	37.9286	38.2868	38.2229	37.5167	37.6911	38.5298	38.7213	38.4718	38.3957	38.0519	37.7051	37.5633	37.755	38.0824	38.2024	36.8796	37.1738	36.822	37.0729	36.928	36.7976	36.8757	36.4804	35.9269	35.4228	36.2785	36.0666	36.2524	35.4005	35.2934	35.2602	35.4587	35.0329	35.3987	35.9359	36.9115	36.5416	37.0654	37.1384	36.9593
Sinapic acid, cis- (2TMS)	C00482	GC	NA	12.9931	13.9651	10.3005	10.2705	NA	15.5132	18.0723	NA	12.2449	10.3248	9.0924	11.1903	NA	18.7181	17.1302	22.4945	14.0953	6.4971	17.3196	16.4151	17.0701	15.5713	12.0591	NA	16.4096	15.3811	15.7648	13.0202	NA	11.3952	12.3666	16.6637	12.8528	15.8906	14.3306	NA	15.2916	4.1898	3.62599	11.8204	15.5397	10.7117	16.0416	NA	11.8617	15.1249
Inositol, myo- (6TMS)	C00137	GC	41.0845	41.1159	41.0197	41.3495	40.8141	40.8195	41.2584	41.3685	40.9385	41.5086	40.7317	40.879	40.8287	40.8674	40.4542	40.6408	40.7324	40.6253	40.9995	40.8779	41.0484	41.0228	40.8704	40.6402	41.2595	40.8884	41.2534	40.7293	41.1971	40.5986	41.1556	41.1589	41.1661	40.8979	40.8818	40.8846	40.7437	40.718	41.1997	40.7291	41.3087	41.2564	40.7395	41.0609	40.9456	40.6784	40.9612
Caffeic acid, trans- (3TMS)	C01197|C01481	GC	26.8109	27.6197	28.4064	26.4251	26.356	29.8184	27.611	25.9849	27.6304	27.2613	25.6174	26.382	27.9997	27.1815	27.0704	27.6538	28.2849	28.6955	27.9215	27.4115	28.6541	27.0084	28.1028	26.9699	30.1409	27.0537	26.6978	29.6237	26.9274	27.5248	29.5752	28.9619	30.0409	27.9835	30.1618	29.0279	28.5617	27.1852	29.1349	27.8661	29.3637	27.6019	30.3567	29.6854	28.8968	28.4444	30.5774
Inositol-1-phosphate, myo- (7TMS)	C01177	GC	33.2721	33.2287	33.2782	33.3198	33.4545	33.1087	33.2397	33.1784	33.6385	33.2469	32.9763	32.9676	32.836	32.5414	32.6545	32.7101	32.3522	32.4208	32.5457	32.9694	32.6614	32.4753	32.2939	32.8536	33.0031	32.8976	32.8267	32.8583	32.7801	33.3398	32.9069	33.1917	33.4134	33.2971	33.4131	33.2761	33.3614	33.2318	33.1335	33.0267	33.2963	32.7839	33.0525	32.9134	33.0497	33.2063	32.9754
Tryptamine, 5-hydroxy- (4TMS)	C00780	GC	35.6543	35.4606	35.4823	35.1623	35.1305	35.6028	34.5822	34.9771	35.2723	35.0565	35.5533	35.1481	34.8515	34.9677	34.7849	34.6792	35.0484	35.1737	34.8222	34.4817	34.8928	35.2977	34.7781	33.8522	33.5958	33.4727	33.4372	33.4753	33.4999	32.9166	32.9766	33.0936	33.0104	33.3168	33.026	32.0771	31.8419	32.1979	31.8382	31.9851	32.0259	33.6359	33.9844	34.287	34.1997	34.4252	34.34
Spermidine [+CO2] (5TMS)	C00315	GC	25.6476	26.1137	26.5298	26.617	26.9279	25.9918	26.5487	26.2179	26.6948	25.7302	25.7067	26.2641	25.5869	24.8077	25.5464	25.187	24.6637	25.271	23.5008	25.1512	24.1157	23.1749	23.6122	25.766	26.1883	25.103	25.9917	26.0174	26.3496	26.4736	25.4557	26.3907	26.2549	25.971	26.501	27.1462	26.8037	27.0587	27.2009	26.4231	26.7695	26.1132	26.4341	26.1434	26.57	26.4706	26.7335
Nicotianamine (4TMS)	C05324	GC	34.8082	34.2097	33.8493	34.546	34.549	34.1978	33.424	33.8178	34.3013	34.0025	32.7703	33.6264	34.262	34.1249	33.8079	33.4545	33.318	33.8375	33.7291	33.6389	33.8472	33.401	33.171	33.1211	32.5081	32.7879	32.4632	32.1112	32.351	32.477	32.3642	32.164	32.7096	32.4147	32.6153	33.0053	32.6311	33.0651	32.7311	32.6402	32.8025	33.7787	34.3262	34.1475	33.9735	34.2668	33.908
Trehalose, alpha,alpha'-, D- (8TMS)	C01083	GC	18.5023	18.5276	20.5422	19.2187	17.6259	NA	21.6493	19.6566	20.4029	21.7495	18.9853	20.9976	16.0601	13.6203	17.0921	16.7249	16.5744	17.6607	14.4729	18.7362	14.1042	NA	17.1556	25.7165	25.3698	22.2469	20.0538	26.9589	24.8043	28.4412	26.4092	28.7541	27.7163	24.3231	29.2172	27.9572	28.155	28.3083	27.0379	26.8527	27.1793	18.7688	26.663	27.2365	27.2043	19.5167	27.0204
Quinic acid, 3-caffeoyl-, cis- (6TMS)		GC	35.5277	35.9307	35.9504	35.9553	35.4741	35.9985	35.2029	35.5571	34.3792	35.8	35.6617	35.4586	35.0964	27.9625	34.1421	34.7192	34.7239	34.9615	35.7774	35.226	35.6808	35.8905	36.0475	37.2788	37.4779	36.9014	36.9595	37.9547	36.6072	36.8763	37.6107	35.6788	36.6492	35.8099	36.7589	36.2436	36.9253	37.2508	36.4166	36.6283	36.4938	37.9486	36.9341	36.3619	37.5707	36.9685	37.5711
Galactinol (9TMS)	C01235	GC	40.7444	40.9704	40.8986	40.9821	40.9364	41.5045	40.6166	41.2775	40.578	41.1793	41.346	41.0612	41.728	40.9208	41.0846	41.0375	41.1358	41.0223	39.8252	39.4563	40.2298	40.2154	38.3674	40.2632	38.3724	38.3919	38.0481	38.6916	38.0878	36.0215	36.1748	35.1301	36.1673	35.8929	35.7612	35.6016	35.6663	36.0219	35.692	35.5837	35.6307	38.8174	38.7317	39.1247	39.789	38.9506	38.496
Quinic acid, 3-caffeoyl-, trans- (6TMS)	C12209|C00852	GC	37.374	37.4637	37.531	36.8482	37.2344	36.9837	37.0179	36.9139	37.5855	38.2316	36.7179	36.9659	36.9326	37.4022	36.9946	36.9801	36.6512	36.7166	36.3523	36.5154	36.5322	36.6115	35.8301	37.381	37.2976	37.3129	37.2972	37.2056	37.0892	36.4436	36.6098	36.4329	36.7875	36.7803	36.6895	36.992	37.1618	37.2064	36.9447	36.6936	37.2248	37.5693	37.9466	37.69	37.9396	37.8925	37.5601
Tocopherol, alpha- (1TMS)	C02477	GC	29.9816	30.4204	30.0971	30.2518	29.5989	30.5473	28.908	30.1581	29.5952	29.9288	29.9892	30.0442	30.8259	31.2321	31.1742	31.0197	31.1534	30.6064	30.9498	30.6738	30.6817	30.7067	29.5103	29.0399	27.2243	28.0768	27.5895	28.1787	27.7604	27.194	27.6581	26.8329	27.0031	27.2651	27.299	27.2143	27.3041	27.3546	27.2397	27.6098	26.818	29.4991	29.5737	29.7265	28.8588	28.8225	29.4126
Stigmasterol (1TMS)	C05442	GC	29.1468	30.3778	29.8292	29.1982	30.4492	29.9071	29.9415	30.232	30.8575	30.5917	29.5684	29.6644	29.9575	30.5541	29.7789	29.2853	29.1131	28.4614	29.5451	29.1167	29.4077	29.7803	28.4922	27.4832	25.6915	26.261	26.0818	26.2654	27.8669	26.0705	26.2909	26.4927	26.0112	27.0382	25.2929	25.5656	25.8333	25.8779	25.8146	25.7742	27.2332	27.2456	27.0671	26.7336	27.1245	26.788	27.3608
Raffinose (11TMS)	C00492	GC	28.8805	28.7516	28.9287	28.7176	30.2748	28.7102	26.6401	28.883	29.8142	29.16	28.9485	27.7846	29.9663	32.2042	29.0861	28.336	29.4048	29.7482	26.853	26.8432	28.4768	27.859	24.4073	28.7033	25.2985	23.9633	24.2781	27.0691	25.4786	19.3885	14.645	19.2525	21.1	20.6174	19.8863	18.2828	17.406	18.7403	20.3608	19.4747	20.6223	29.3095	28.239	28.9454	29.083	28.1662	26.6733
Sitosterol, beta- (1TMS)	C01753	GC	31.3583	31.8033	31.7111	31.5257	31.402	32.1239	31.1011	23.8386	31.3461	32.0929	31.8849	31.8146	30.9136	31.3996	23.5058	31.4488	30.4706	30.3048	30.3211	30.5745	30.8438	30.3544	29.2258	29.5597	28.4582	29.846	29.3042	28.4763	29.5804	27.3434	28.4875	28.2106	28.9747	28.2467	28.3673	28.7052	28.3403	27.5918	28.9881	27.604	28.8761	29.0969	29.2552	29.5144	28.7396	29.065	28.4765
Proline	C16435|C00763|C00148	GC	32.1036	31.7714	31.913	30.7818	32.3875	32.0868	31.7969	30.9703	32.663	32.0456	32.1243	31.1644	32.9998	32.3918	33.6651	33.1489	31.8253	33.756	31.2796	31.6935	31.5544	31.7737	31.0747	34.7621	34.7303	35.2461	34.7231	33.5732	33.8426	34.4552	33.0258	33.4949	34.2216	34.2226	34.1236	33.5233	33.4667	34.1853	33.303	33.8713	33.6481	34.8644	36.8192	35.6611	37.2882	36.0089	35.9342
Succinate	C00042	GC	28.2205	28.2114	28.1826	28.147	28.7879	28.0345	28.3776	27.2089	28.6103	28.3211	27.9633	27.8759	27.1017	27.9613	27.5484	27.192	27.2231	27.0053	25.7897	26.1626	26.508	26.8395	25.7971	26.4483	26.6144	26.4862	26.363	26.3946	26.1766	26.725	26.0518	26.4524	26.7042	27.316	26.7093	27.6291	27.2904	27.2726	27.8014	27.142	27.8188	26.7598	26.7191	26.6096	27.0774	27.2372	26.6639
Pyroglutamate	C01879|C02237|C02238	GC	38.7107	38.6546	38.7374	38.769	39.0692	38.6779	38.2823	38.1109	38.319	38.2972	38.2146	38.0651	37.7688	37.7987	37.793	37.8633	37.6896	37.5496	37.3769	37.7417	37.4587	37.3338	37.0041	37.3349	37.5335	37.719	37.4997	37.3446	37.4149	38.3326	37.7018	38.496	38.066	38.4071	38.2956	38.7612	38.164	37.833	38.8808	38.4387	38.676	38.2678	38.0469	38.4468	38.4518	38.0459	38.1355
Glutamate	C00025|C00217|C00302	GC	34.7945	34.6699	34.8116	34.7842	35.4065	34.7833	33.9657	33.7932	34.3414	34.1842	33.8314	33.7315	33.7705	34.1642	33.8731	33.5246	33.2107	33.1254	33.0099	33.1726	33.3177	33.1935	32.4468	32.4119	32.2971	32.3172	32.1784	32.3002	31.9985	32.3315	31.4993	31.7843	31.9881	32.6941	32.2686	33.3648	33.0262	32.7558	33.4096	33.0827	33.3741	33.6628	33.6584	33.8736	34.0742	33.6633	33.4965
Sucrose	D00025|D06530|D06531|D06533|C00089|D06529|D06528	GC	34.3877	34.422	34.4336	34.4326	34.5667	34.3327	34.41	34.5379	34.6892	34.7006	34.5942	34.5438	34.2502	34.4847	34.239	34.2738	34.2855	34.3213	33.7278	33.7229	33.8134	33.9307	33.445	34.163	33.8999	33.8986	33.8484	33.8424	33.8769	33.3692	33.2333	33.2686	33.4775	33.4162	33.3709	34.0221	33.9386	33.8607	34.2051	33.7442	33.923	34.3891	34.4466	34.4821	34.3661	34.52	34.3609
Putrescine	C02896|C00134|C03687	GC	25.6318	25.863	25.8949	25.7149	26.0593	25.7479	25.1239	25.3432	25.1787	25.355	25.5925	25.5893	24.0442	23.9234	24.2033	24.329	24.0471	24.4158	23.8151	23.7375	23.719	23.3803	23.6358	23.9018	23.8565	23.8143	23.6689	23.7643	23.4893	23.6932	23.3163	23.5991	23.5654	23.4846	23.4456	24.1919	24.0992	24.0818	24.1669	24.0493	24.1915	24.9281	24.8684	25.4006	25.3401	24.7784	25.0709
Hexadecanoate	C00249|D05341	GC	28.0168	28.3375	28.5844	28.4586	28.0886	28.174	28.3993	28.1045	28.011	27.9997	27.8623	27.6404	28.0511	27.8824	27.9242	27.9954	27.8761	27.1378	27.8457	28.456	27.9521	27.9013	27.4586	27.481	28.1309	27.7436	27.8184	28.2426	28.1608	27.8415	28.2053	27.9013	27.915	27.8832	27.7252	27.7678	28.2162	27.6831	27.8657	28.2081	28.2231	28.0824	27.7849	27.7645	28.1822	28.062	28.2603
Aspartate	C00402|C00049|C16433	GC	36.6925	36.6727	36.6664	36.7759	36.9867	36.7178	36.0307	35.8723	36.2698	36.2889	35.9502	35.8392	35.846	35.8415	35.8707	35.4832	35.2547	35.2768	35.1712	35.3356	35.6478	35.3971	34.7326	34.8215	34.6719	34.746	34.5356	34.6088	34.3774	35.0547	34.1549	34.5276	34.7621	34.7917	34.9976	35.6187	35.5703	35.3357	35.6093	35.3131	35.5933	35.879	35.9317	36.0226	36.0612	35.8556	35.8753
Histidine	C00135|C00768|C06419	GC	26.5719	26.3088	26.6683	26.6512	27.226	26.7697	25.8259	25.9595	26.3596	26.0283	26.5148	26.0451	26.5317	25.8161	26.4333	25.872	25.2622	25.9409	28.4248	27.717	27.8117	27.2206	27.9787	26.1315	26.4911	26.593	26.3233	26.2106	26.3665	28.2569	26.4638	28.1916	27.8996	27.9415	27.5805	28.9056	27.938	27.6909	29.1536	28.6791	28.6562	27.6916	27.7017	28.0961	28.1038	28.0814	28.0533
Cysteine	C00736|C00793|C00097	GC	22.3651	21.9093	22.5034	22.2346	22.8993	22.1642	22.7777	21.8775	22.3171	22.3742	21.7667	21.6866	22.1993	22.2195	22.2915	22.2489	21.8354	22.3964	21.8343	22.2775	22.0847	22.0498	22.0325	22.5496	23.0407	22.8644	22.985	22.7845	22.9499	23.7044	23.0356	23.8605	23.6686	23.6257	23.6641	24.597	24.3351	23.837	24.8663	24.1605	24.309	24.0363	23.8068	23.853	23.5304	23.6997	24.032
Silane, trimethyl(2-methylbutoxy)-		GC	28.1407	24.8869	27.8817	26.7229	25.4144	26.6027	23.8486	27.391	25.0394	27.0601	28.4556	27.4422	24.4818	10.2836	28.0056	25.5975	23.0037	27.3865	27.125	27.3161	25.6712	25.6606	24.6053	27.1195	26.8493	28.49	27.5037	27.7798	27.3916	27.1856	28.0058	28.1711	27.4719	26.6236	27.137	27.0222	26.7138	26.7732	27.0069	27.0907	27.8068	25.9513	26.8923	26.8261	24.4666	27.4944	27.8662
Silane, [(1-ethylpentyl)oxy]trimethyl-		GC	32.1907	31.9586	32.2296	32.0838	32.1188	32.1669	31.4615	31.742	31.5569	31.7975	31.9798	31.674	31.6006	31.7166	31.8809	31.5904	31.3975	31.8238	31.4376	31.6766	31.5713	31.6097	31.6483	31.258	31.645	31.7889	31.5751	31.3286	31.7388	31.6492	31.9538	31.7088	31.7572	31.8103	31.6992	31.9102	31.9093	31.5523	31.9175	31.668	32.0907	31.973	32.0496	32.1749	32.8984	32.0125	32.5163
Silane, trimethyl[(1-methylhexyl)oxy]-		GC	32.7556	32.5276	32.8296	32.5992	32.4455	32.82	31.8016	32.1543	32.0501	32.0405	32.2772	32.0501	32.3025	31.8452	32.5313	32.2184	31.6659	32.3269	32.0494	32.2659	32.1456	32.1977	32.6314	31.9155	32.1022	32.3209	32.1171	31.8075	32.2311	32.1614	32.3017	32.3285	32.1162	32.3087	32.0465	32.5478	32.5632	32.2952	32.2928	32.2514	32.5934	32.3114	32.547	32.7856	33.2866	32.4578	33.1518
Tetrasiloxane, decamethyl-		GC	29.0657	27.5466	29.212	28.5184	28.1623	28.9509	26.9915	28.3621	27.5199	28.5681	28.7637	28.4787	27.5812	26.4366	28.6928	27.5688	27.5114	28.4583	28.4753	28.1355	28.1976	27.9551	28.0842	27.6609	27.9263	28.7901	28.4487	28.0207	28.2198	28.5392	28.4622	28.6702	28.2608	28.1041	28.2373	28.0235	28.0623	28.2734	28.5098	28.1837	28.4524	27.907	28.4801	28.4193	28.3581	28.6248	29.5859
Lactic acid, DL- (2TMS)	C00186|C01432|C00256	GC	33.104	33.3861	32.816	31.5286	33.8774	33.0496	31.5903	31.6812	32.0851	33.6352	33.4751	32.8293	32.8528	31.7314	33.2857	33.0085	31.6067	33.213	32.9864	33.7652	34.2988	33.171	30.3292	32.636	32.4285	32.272	32.6576	34.1085	32.8687	32.7611	32.5702	34.493	33.6665	33.2691	32.8663	31.2266	33.1795	32.2586	33.9717	32.8689	32.426	32.7835	33.4248	31.3719	32.6659	33.1383	32.8303
Homoserine, DL- (3TMS)	C00263	GC	26.8904	26.823	27.4151	26.6961	26.912	25.9007	27.7975	26.3767	27.4795	27.8655	26.1735	26.5502	24.5346	23.4402	24.2273	24.4317	25.4022	25.0352	15.6988	16.5401	20.1921	21.7348	22.9102	26.8195	29.1605	28.9666	29.0788	27.505	28.2325	28.8683	27.7514	29.5184	27.9084	28.7547	28.3831	30.1242	28.8606	28.4894	29.7549	29.3601	29.6609	29.2007	28.9221	30.0373	31.3748	28.7858	29.4101
Piperidin-2-one, 3-amino- (2TMS)		GC	29.5551	30.318	30.448	31.0076	31.0453	30.4138	29.5021	29.1066	29.7105	29.4548	29.4869	29.2581	27.4443	27.5197	27.8955	27.4533	27.2258	27.2832	29.4707	29.2114	29.6542	29.4541	30.0317	28.8816	29.4123	29.8399	29.4383	29.0276	28.7036	30.9185	29.3271	30.783	30.5817	31.335	30.2684	31.8045	30.9695	30.3575	32.1073	30.9866	31.4299	31.2285	30.7915	30.7527	31.2243	31.1196	30.588
Malic acid, DL- (3TMS)	C00497|C00149|C00711	GC	42.0337	41.8222	42.0546	41.8421	42.0322	41.2935	41.8828	41.3993	41.9428	42.0941	41.389	41.5392	41.7634	41.8122	41.9953	41.7992	42.0484	42.0583	40.8088	41.4105	41.4513	41.5994	41.4304	41.8025	41.904	42.0093	41.9699	41.7143	41.8025	42.3951	42.1418	42.3821	42.2908	41.9621	42.4315	42.8893	42.824	42.6868	42.821	42.4759	42.7378	42.2889	42.435	42.5793	42.6064	42.3251	42.5762
Butyric acid, 4-amino- (3TMS)	C00334|D00058	GC	39.1595	39.041	39.3283	38.8479	39.6311	38.489	39.7499	38.7871	39.6953	39.2841	38.7529	38.9688	37.2242	37.0692	37.1314	37.7251	37.913	37.4999	36.93	37.4312	36.6483	36.9527	36.9381	39.3836	39.901	39.795	40.0949	39.8869	39.6554	39.7913	39.9944	40.5643	40.0001	39.8693	40.3799	40.4986	39.845	39.8473	40.42	39.99	40.0433	40.4454	40.1828	40.3016	40.3003	40.2294	40.3123
Threonic acid (4TMS)	C01620	GC	34.9096	33.8624	35.0612	34.9795	34.4604	34.533	34.6869	33.013	34.6652	34.404	34.2633	34.3619	32.6054	32.8728	32.9309	33.088	32.8458	32.7979	32.2442	32.1746	32.767	32.9111	31.7503	33.4384	33.7142	33.6442	33.8566	33.6824	33.594	33.6422	33.1303	33.0271	33.4502	33.1218	33.239	33.7584	33.9225	33.6553	33.9696	33.1881	33.8201	33.3294	33.069	32.9688	33.0558	33.4436	33.5001
Glutaric acid, 2-oxo- (1MEOX) (2TMS)	C00026	GC	32.1439	32.7586	33.3557	33.1372	32.1243	31.9103	32.0239	33.4439	31.875	32.8149	30.5667	32.427	33.3242	33.8812	32.7904	33.3493	33.756	33.4483	31.2934	32.5223	31.1425	31.5885	32.3978	33.121	33.7063	33.7455	33.6594	32.8916	33.3592	33.6465	33.8692	33.5167	33.0392	33.4911	33.2681	34.5855	34.1686	34.4474	34.4712	34.051	34.3026	35.2875	35.1129	35.359	36.0886	34.6387	35.1403
Phenylalanine, DL- (2TMS)	C00079|C02265|C02057	GC	36.1083	36.2033	36.1622	36.7348	36.7467	36.5623	35.0875	35.273	35.8256	35.4812	35.3913	35.6534	37.6334	38.4516	37.7871	36.9087	36.788	36.8973	39.5531	38.6173	39.1842	38.9614	38.4043	35.5074	34.7241	34.4984	34.4336	34.754	34.5792	34.5746	34.0823	33.8445	34.5658	34.7423	34.1619	34.98	34.855	34.2141	35.8633	34.9534	35.3501	35.9752	36.4453	36.5376	36.6958	36.4014	36.4174
Xylose, D- (1MEOX) (4TMS)	C01394|C01510|C00181	GC	35.7548	35.8279	36.0314	35.7277	36.5508	35.4131	37.1001	35.8602	36.4951	36.3821	36.7792	36.5094	32.4743	32.2624	32.2309	32.9742	32.4983	33.0973	31.8088	32.2821	31.6859	31.884	32.5705	33.5361	34.4476	34.3832	34.5546	34.0083	34.0398	35.6945	34.7858	35.8493	35.6008	36.3374	35.525	36.7038	35.9157	35.6001	36.6362	36.0967	36.7841	34.4407	34.0129	34.8036	35.2556	33.7276	34.4078
Propane, 1,3-diamino- (4TMS)	C00986	GC	29.7163	29.6455	29.8047	30.2961	30.2243	29.8124	28.0889	28.1568	28.239	28.0787	27.8708	28.0465	28.1372	27.6265	28.9519	28.8295	28.6683	28.5156	28.0715	28.2749	27.5474	27.8117	28.0604	27.3733	27.491	27.448	27.4378	27.2066	27.145	28.8998	27.4331	28.5744	27.8893	27.6841	28.1774	28.6592	27.2957	24.9204	29.5019	28.2311	28.517	28.0498	27.7992	29.4334	28.3309	28.8732	28.6327
Ribose, D- (1MEOX) (4TMS)	C00121|C08353	GC	31.7945	31.7399	32.1085	31.9222	30.917	31.9094	31.7507	31.2256	31.9028	31.6438	31.8074	31.5746	31.5174	30.6072	31.5782	31.3055	31.3878	31.368	31.2922	31.9435	31.6478	31.7978	32.0143	30.81	31.0335	31.154	31.0068	31.2115	30.7359	32.0325	31.1722	31.714	31.5813	31.954	31.6733	32.0698	31.8451	32.0678	32.1658	32.0078	32.2433	31.2714	31.2643	31.7638	32.145	31.3853	31.7162
Glycerol-3-phosphate, DL- (4TMS)	C00623|C00093|C03189	GC	33.9101	33.9139	33.7973	33.7402	34.0354	33.9352	34.7978	34.9481	35.1721	35.0627	34.698	34.6838	35.6537	35.5727	35.8118	35.6577	35.2549	35.4999	34.6441	34.6689	35.0633	34.9276	33.6151	36.3404	36.5441	36.4914	36.4196	36.3678	36.0635	34.5509	34.5777	33.8348	34.9463	34.6539	34.8636	32.9618	33.6715	33.6229	32.4953	32.7792	32.875	36.1588	36.4305	36.1749	36.196	36.6301	36.1553
Phytol (1TMS)	C01389	GC	26.3133	26.3009	26.7712	26.4595	27.2405	27.4442	27.4355	27.5035	27.9181	27.6665	27.3028	27.5627	27.1812	27.2206	26.996	26.6944	27.6809	26.7446	25.7366	25.678	26.4377	26.4287	25.2846	28.2255	27.159	27.3845	27.3279	27.5999	26.3867	24.229	24.5665	24.3893	24.4016	25.3227	25.456	24.7826	22.9793	24.9958	20.8889	24.0478	23.4865	27.5406	27.7603	27.2364	28.2468	27.901	27.2719
Octadecadienoic acid, 9,12-(Z,Z)-, n- (1TMS)	C01595	GC	37.2115	37.6036	37.8075	37.688	37.3065	37.4187	37.5578	37.3829	37.1488	37.1532	36.9392	36.5466	37.4288	36.7812	37.0081	37.0681	36.2344	36.0932	36.5761	37.6438	36.8043	36.6474	36.2929	36.541	37.3453	36.716	36.7861	37.4702	37.1641	36.753	37.2442	36.8385	36.9763	36.6811	36.5653	36.8173	37.5505	36.8456	36.9479	37.4763	37.4276	37.434	37.0334	36.9484	37.2015	37.3642	37.2912
Octadecatrienoic acid, 9,12,15-(Z,Z,Z)-, n- (1TMS)	C06427	GC	34.0356	34.6327	34.5813	34.5626	34.3093	34.4473	34.2718	34.3833	34.1945	33.8912	33.9084	33.3302	34.3049	34.0139	34.0918	34.0341	33.7123	33.3293	33.8278	34.7415	34.188	33.8336	33.5755	33.4493	34.1831	33.6587	33.607	34.0922	33.8603	33.9469	34.0552	33.7591	33.8314	33.9506	33.6065	33.5781	34.0081	33.4689	33.3169	34.5477	34.2293	34.1886	33.8335	33.6006	33.8627	34.174	33.9099
Tryptophan, DL- (3TMS)	C00806|C00078|C00525	GC	32.1495	31.9804	32.1351	32.467	32.5768	32.5259	30.6767	31.1333	31.6804	31.1246	31.554	31.2306	32.6888	32.7565	32.5132	31.9757	31.7595	31.9897	35.2901	34.348	34.5604	34.3707	34.3979	31.0234	30.4494	30.7718	30.3743	30.609	29.9828	31.4264	30.5046	30.935	31.6205	31.4513	31.183	31.7234	30.5949	31.1013	32.1913	31.4315	31.6494	30.6287	31.2779	31.0986	30.8821	31.3037	31.4068
Tryptamine (3TMS)	C00398	GC	31.5236	31.6251	31.9818	31.6842	31.7657	32.0159	31.7591	31.5374	31.6708	31.6152	31.7549	31.3065	32.9407	33.202	32.9395	32.9441	32.8577	32.537	34.0721	33.8013	33.4683	33.6764	33.3802	31.7681	31.8532	31.6338	31.6107	32.2083	31.8471	32.4743	32.2564	32.0908	32.4676	32.2372	32.2658	32.1145	31.7594	32.1827	32.1819	32.2005	32.3858	32.1574	32.3385	32.4162	33.0363	32.5828	32.8952
Spermidine (5TMS)	C00315	GC	34.1785	34.2229	34.2832	34.2319	34.457	34.2246	33.794	33.9396	34.43	34.3397	33.9261	33.9096	34.1344	34.063	33.9766	33.8616	33.7137	33.8439	33.5522	33.6082	33.648	33.6532	33.3141	33.5742	33.6122	33.6505	33.4528	33.4959	33.2439	33.685	33.1099	33.3302	33.5214	33.2948	33.5941	33.842	33.5637	33.9457	33.9284	33.7388	33.8517	34.0476	34.4953	34.4444	34.7685	34.467	34.5077
Fructose-6-phosphate (1MEOX) (6TMS)	C00085	GC	34.8406	34.5074	34.7858	35.0705	35.4227	34.703	34.3278	33.9705	34.6814	34.5733	34.0908	34.029	34.2656	33.7846	33.9906	33.696	34.0171	34.1941	32.762	33.34	33.3172	33.1083	32.794	34.0225	34.0607	33.965	33.9398	33.8797	33.715	34.5136	33.4075	34.4528	34.316	33.8321	34.5702	35.7524	35.6108	35.6452	35.5791	35.1268	35.6628	35.4014	35.4381	35.3875	35.7118	35.5693	35.4871
Cystine, L- (4TMS)	C01420|C00491	GC	26.7831	27.004	26.6932	27.0483	27.4302	26.7605	26.422	26.5276	27.1173	26.8287	26.4041	26.5753	26.9364	26.4476	26.2411	26.7199	26.2187	26.866	25.2288	26.0354	24.5788	25.2633	24.972	26.2088	26.166	25.7408	25.561	25.5925	26.0028	26.2814	25.0995	25.9791	25.9548	25.3054	26.6707	27.443	27.1356	27.4682	27.6108	26.8428	27.1227	27.0589	27.5311	27.4593	27.6863	27.516	27.3718
Glucose-6-phosphate (1MEOX) (6TMS)	C00092|C01172|C00668	GC	36.5832	36.4847	36.7714	36.5889	37.1083	36.3956	36.2319	36.0515	36.565	36.611	36.131	36.2566	36.3546	35.9373	35.9678	36.0341	35.8558	36.4055	34.9586	35.2463	35.1541	35.1489	34.9277	36.0474	36.0011	35.7811	35.7986	35.8397	35.6695	36.257	35.0678	36.2011	35.875	35.3944	36.2105	37.5173	37.3283	37.3774	37.578	36.9488	37.4836	36.9499	37.3513	37.5347	37.5346	37.4376	37.4062
Allantoin	D00121|C02348|C01551	GC	25.4631	24.8241	25.3314	25.2817	26.2432	24.7185	23.9966	24.5012	25.1972	25.1494	24.2312	25.0048	24.6284	24.9758	24.5592	24.3418	25.2187	24.363	24.7792	24.5115	24.5855	24.2426	24.0747	23.4072	23.3247	23.5134	23.1916	23.3232	23.2543	25.101	24.5991	24.9023	24.1365	24.2307	24.4599	24.5184	23.3869	23.2695	24.4417	24.0857	23.7831	23.8673	24.1877	24.4195	24.5736	23.9445	24.9911
Nicotinate	C00253|D00049	GC	30.3163	30.3916	30.3538	29.8586	29.8158	30.3474	30.1817	29.8583	30.2411	30.1746	30.9271	29.8003	31.4167	31.9485	31.792	31.4781	31.932	31.4401	32.7056	32.211	31.9611	32.2117	31.4589	30.4954	30.6192	30.4256	30.319	31.0457	30.2251	30.1112	29.5521	29.4426	29.8825	30.0533	29.7963	29.9419	29.5865	29.5572	29.984	29.867	30.0486	31.3639	31.6756	32.0993	32.3265	32.2668	31.8172
Methionine	C00073|C01733|C00855	GC	27.1818	27.1238	26.7774	26.4746	27.3597	26.9333	26.6844	26.3128	27.1193	26.6822	26.391	26.2405	27.9097	27.7079	27.9004	27.6602	27.3989	28.1072	27.4462	27.8974	27.8619	27.6149	27.6163	26.813	26.7229	26.8097	26.4731	26.2411	26.9184	26.3747	26.0894	26.093	26.977	27.2571	26.3076	27.1636	26.4236	26.2164	27.1387	26.6289	26.8401	29.2227	29.2905	29.6297	30.8278	29.4054	29.5089
Glucose1	C00267|C00293|C00221|C00031	GC	34.5505	34.6959	34.796	34.602	34.9511	34.3328	35.5882	34.9851	35.398	35.4169	35.4068	35.4352	32.2764	31.7297	31.5641	32.6705	32.5274	33.075	31.756	31.9303	31.4184	31.534	32.4572	33.6551	34.1394	34.1874	34.3943	33.7047	33.9412	35.274	34.6251	35.5821	35.5647	35.6872	35.3897	36.0265	35.6143	35.4376	36.2109	35.6333	35.9913	33.7302	33.6695	34.1998	34.4914	33.2853	33.8936
DAG_34:3 ([M+NH4]+)		LIPID	-1.13416	-1.01275	-1.05649	-1.3259	-1.17592	-1.18246	-1.01217	-0.978236	-0.959598	-1.11341	-1.35255	-2.54456	-0.581864	-0.75755	-0.722848	-0.853084	-0.857521	-0.777937	-0.429149	-0.599681	-0.157303	-0.630841	-0.427595	-1.03268	-1.03298	-1.04662	-1.10129	-1.0616	-1.02122	-0.992517	-1.11904	-1.02856	-1.15393	-1.24845	-1.01946	-1.09234	-0.929336	-1.18377	-1.21257	-1.39631	-1.26812	-0.903468	-0.852824	-0.774232	-0.864071	-0.940922	-1.03032
DAG_36:4 ([M+NH4]+)		LIPID	-0.333334	-0.234296	-0.245369	-0.517048	-0.402016	-0.324094	-0.33388	-0.401254	-0.457791	-0.628608	-0.70322	-1.93346	-0.487621	-0.774232	-0.710992	-0.63554	-0.657218	-0.643856	-0.363828	-0.601869	-0.224654	-0.544982	-0.331699	-0.408512	-0.172994	-0.183441	-0.0900349	0.00216242	-0.0617519	0.0554733	-0.191656	0.217603	-0.0831412	0.164143	0.0251706	0.656634	0.788936	0.61551	0.669662	0.54201	0.646624	0.318693	0.0959919	0.086512	-0.0587434	0.077243	0.0143553
DAG_36:5 ([M+NH4]+)		LIPID	-1.58294	-1.53324	-1.51829	-1.71359	-1.65472	-1.64431	-1.59641	-1.60121	-1.59292	-1.75049	-1.88151	-2.87303	-1.28806	-1.56875	-1.45918	-1.46913	-1.49696	-1.50922	-1.09142	-1.24093	-0.97228	-1.32807	-1.16036	-1.63891	-1.4489	-1.47594	-1.51251	-1.43129	-1.48803	-1.16004	-1.47033	-1.22331	-1.47674	-1.35402	-1.23548	-1.11747	-0.945638	-1.19297	-1.17658	-1.26188	-1.18836	-1.32771	-1.40163	-1.38798	-1.53617	-1.54456	-1.50553
DAG_36:6 ([M+NH4]+)		LIPID	-3.43284	-3.42198	-3.37632	-3.42043	-3.48036	-3.49981	-3.36142	-3.35993	-3.37782	-3.43284	-3.61176	-4.61529	-2.97937	-3.14561	-3.06854	-3.07948	-3.13037	-3.23107	-2.64837	-2.79286	-2.55639	-2.94231	-2.87197	-3.45166	-3.34813	-3.40966	-3.51128	-3.55809	-3.60121	-3.29903	-3.53617	-3.47393	-3.5412	-3.64386	-3.41273	-3.75438	-3.57004	-3.83444	-3.82011	-3.99769	-3.89539	-3.5245	-3.47714	-3.37034	-3.4066	-3.64928	-3.64386
DAG_36:1 ([M+NH4]+)		LIPID	-6.39289	-5.90401	-6.05889	-6.26534	-7.13797	-6.93016	-5.74082	-6.08804	-6.04931	-6.48036	-6.64386	-7.55979	-7.03978	-7.05889	-7.28771	-7.26534	-7.40507	-7.33352	NA	-8.07826	-7.48036	-7.89539	NA	-5.02093	-4.88683	-5.03978	-4.84477	-5.35107	-5.04454	-4.82419	-4.79987	-4.93457	-4.70275	-5.21625	-5.32771	-4.64025	-4.62238	-4.54625	-4.72166	-5.05409	-5.31617	-4.40507	-4.36885	-4.4112	-4.41427	-4.47393	-4.52284
DAG_36:2 ([M+NH4]+)		LIPID	-2.58988	-2.38836	-2.51622	-2.82419	-2.87408	-2.73504	-2.63935	-2.72547	-2.72642	-3.00578	-3.04097	-4.39897	-2.76513	-2.88151	-2.85831	-2.82419	-2.95792	-3.01042	-2.44222	-2.68316	-2.23243	-2.7819	-2.60911	-2.7084	-2.51787	-2.60911	-2.56747	-2.68316	-2.56576	-2.34373	-2.47313	-2.21023	-2.25912	-2.45958	-2.62861	-1.86512	-1.72213	-1.8329	-1.87039	-2.10905	-2.07948	-1.81046	-2.00926	-2.04394	-2.09419	-2.01217	-2.16424
DAG_36:3 ([M+NH4]+)		LIPID	-2.87832	-2.51046	-2.68131	-2.96804	-3.22028	-3.05529	-2.47955	-2.39517	-2.49899	-3.03505	-3.06733	-4.33643	-4.03505	-4.2849	-3.95456	-4.58035	-4.90401	-5.25429	-3.34813	-3.59248	-3.1016	-3.66383	-3.40507	-1.83239	-1.7819	-1.8725	-1.58597	-1.92413	-1.76513	-1.553	-1.74904	-1.5043	-1.5121	-1.79736	-1.90347	-0.944527	-0.854127	-0.923578	-1.0743	-1.35328	-1.2849	-1.23548	-1.34227	-1.39441	-1.38873	-1.32229	-1.43207
SE_campesteryl linolenate ([M+NH4]+)		LIPID	-4.87408	-4.9568	-5.26534	-5.30472	-5.50635	-5.4933	-4.81198	-4.89111	-4.92577	-4.8997	-5.25429	NA	-3.9703	-4.25981	-4.03032	-4.01859	-4.38685	-4.33352	-4.22972	-4.38685	-3.66749	-4.15586	-4.49981	-5.01625	-5.2109	-5.15843	-5.24879	-5.66566	-5.39897	-5.2109	-5.14816	-5.06854	-5.29336	NA	NA	-5.02562	-4.75633	-4.72166	-5.51953	-5.68038	NA	-5.30472	-5.32193	-4.9885	-5.42353	-5.97483	-5.69526
SE_cholesterol linoleate* ([M+NH4]+)		LIPID	-2.89862	-2.75828	-3.11904	-2.81705	-2.99424	-3.0517	-2.8365	-3.01392	-3.06371	-3.09173	-3.38082	-4.2029	-2.90617	-3.12281	-3.01042	-2.92358	-3.15843	-3.06975	-3.59248	-3.77201	-2.96128	-3.45166	-3.86565	-3.34227	-3.45008	-3.48197	-3.3629	-3.43284	-3.46275	-3.37632	-3.17527	-2.9412	-3.12532	-3.5245	-3.64205	-2.94453	-2.65654	-2.58294	-3.07704	-3.1291	-3.27369	-3.43753	-3.50799	-3.31186	-3.44379	-3.82828	-3.52616
SE_campesteryl linoleate ([M+NH4]+)		LIPID	-3.78588	-3.79186	-3.8365	-4.00462	-4.0517	-4.01625	-3.64747	-3.72166	-4.07582	-3.85935	-4.18705	NA	-3.35255	-3.59423	-3.33789	-3.36587	-3.51787	-3.50308	-3.56149	-3.68038	-3.11154	-3.54288	-3.69339	-4.06854	-4.29619	-4.42043	-4.20823	-4.38685	-4.32482	-4.58381	-4.35402	-4.1818	-4.17919	-4.57691	-5.28209	-4.08559	-3.74275	-3.86355	-4.20823	-4.33643	-4.47073	-4.32771	-4.30187	-4.22162	-4.29619	-4.80793	-4.59423
SE_sitosteryl linoleate ([M+NH4]+)		LIPID	-1.92577	-1.94231	-1.92194	-2.2029	-2.05769	-1.88364	-1.51499	-1.49127	-1.84218	-1.63801	-1.73841	-2.78588	-1.05469	-1.31079	-1.09542	-1.10656	-1.09357	-1.10253	-1.1565	-1.29619	-0.7556	-1.1976	-1.15104	-2.22769	-2.48924	-2.673	-2.49248	-2.52036	-2.36513	-3.36142	-3.2109	-3.15972	-3.38383	-3.71028	-3.69526	-3.26257	-3.22297	-3.27509	-3.65836	-3.92139	-3.84892	-3.1805	-3.01859	-2.53282	-2.79086	-3.26534	-3.27928
SE_sitosteryl linolenate ([M+NH4]+)		LIPID	-2.37707	-2.44379	-2.4135	-2.47714	-2.46355	-2.39821	-1.8762	-1.9105	-2.03741	-1.91757	-2.08743	-3.01508	-1.27021	-1.48277	-1.28244	-1.33716	-1.38685	-1.35144	-1.35882	-1.50717	-0.865648	-1.35698	-1.40928	-2.23379	-2.47313	-2.60823	-2.5245	-2.49492	-2.35255	-2.55216	-2.48681	-2.42585	-2.57089	-2.8396	-2.70181	-2.16812	-2.03623	-2.02034	-2.46196	-2.58554	-2.58814	-3.01625	-2.95456	-2.61529	-2.85517	-3.22162	-3.07339
SE_stigmasteryl linolenate ([M+NH4]+)		LIPID	-4.73312	-4.66933	-4.86986	-4.73697	-4.91702	-5.13797	-4.24879	-4.21357	-4.41427	-4.4112	-4.69152	NA	-4.03505	-4.21625	-4.08559	-4.05409	-4.53617	-4.41427	-4.35993	-4.60121	-3.88257	-4.40813	-4.75244	-4.40507	-4.46435	-4.68409	-4.57347	-4.51953	-4.52949	-4.09542	-4.03741	-4.08314	-4.25981	-4.74082	-4.37782	-4.03032	-3.84477	-4.01625	-4.61883	-4.74468	-4.75633	-5.06854	-4.90401	-4.74082	-4.99309	-5.38685	-5.48036
PE_34:2 ([M+H]+)		LIPID	2.12459	2.17348	2.17632	2.05488	2.22107	2.27834	2.15205	2.14848	2.12829	2.18085	2.22913	1.41884	1.9361	1.8894	1.92524	1.96051	1.98229	2.00684	1.8352	1.77041	2.04771	1.80364	1.84161	2.01653	2.07881	2.1135	2.15092	2.36107	2.29437	2.25078	2.17092	2.33044	2.28137	2.29602	2.43494	2.36748	2.45618	2.39646	2.46511	2.48592	2.49823	2.31522	2.28454	2.30932	2.22639	2.35538	2.29778
PE_34:3 ([M+H]+)		LIPID	0.236217	0.274053	0.350724	0.257493	0.43776	0.43328	0.367147	0.436162	0.443607	0.527571	0.544386	-0.294774	0.475811	0.448267	0.475915	0.423417	0.463099	0.446891	0.410558	0.387142	0.631896	0.318461	0.370164	0.23217	0.161565	0.173767	0.143524	0.350497	0.316841	0.299714	0.239276	0.212009	0.234011	0.183836	0.542605	-0.0177091	0.0718999	-0.088807	-0.0894208	-0.0502036	0.00676478	0.0943712	0.235359	0.293841	0.217851	0.292428	0.215989
SE_cycloartenyl/ lanosteryl linoleate ([M+NH4]+)		LIPID	-4.53952	-4.46753	-4.62593	-4.58727	-4.99309	-4.79987	-3.67669	-3.70651	-3.90833	-3.79786	-4.27928	NA	-3.8427	-4.05889	-3.90401	-3.91267	-4.2709	-4.30472	-4.50635	-4.38685	-3.71407	-4.13037	-4.74082	-4.77201	-4.9885	-4.94786	-4.89539	-5.30472	-5.03978	-5.87832	-5.64386	-5.84477	NA	NA	NA	NA	-5.24332	-4.94786	NA	-5.70275	-6.17919	-5.49981	-5.60121	NA	-5.53282	-6.13797	-5.91267
PE_34:1 ([M+H]+)		LIPID	-2.52201	-2.39062	-2.48762	-2.59423	-2.66933	-2.61706	-2.11404	-2.17853	-2.28069	-2.39821	-2.55979	-3.38534	-3.63666	-3.58727	-3.79586	-3.57004	-3.76808	-3.95456	-4.27928	-4.47714	-4.06854	-4.2109	-4.78787	-2.18246	-2.04811	-2.33789	-2.03386	-2.19959	-2.23243	-2.78986	-2.67761	-2.62238	-2.47473	-2.53032	-2.67116	-2.71217	-2.67853	-2.74565	-2.82215	-2.96804	-3.0517	-2.33935	-2.30116	-2.29903	-2.29903	-2.25429	-2.57004
Polyisoprenoid_decaprenol ([M+NH4]+)		LIPID	-7.13797	-7.26534	-7.86145	-8.07826	NA	-7.96578	-7.35698	-7.73312	-7.40507	-7.96578	-8.70275	NA	-7.64386	-7.31043	-6.94786	-7.53282	-7.70275	-8.15843	-6.57347	NA	-6.12784	-7.70275	-7.05889	-7.82828	-8.15843	NA	-7.82828	-8.76415	-8.53282	-7.35698	-7.53282	-7.20025	-7.86145	-8.28771	-8.15843	-6.65836	NA	-6.82828	-6.70275	-7.50635	-7.35698	NA	NA	-7.13797	-7.45482	-7.673	-7.79586
PE_36:5 ([M+H]+)		LIPID	0.667483	0.714927	0.729009	0.635244	0.748375	0.78442	0.633106	0.679063	0.704341	0.736388	0.761796	-0.0475173	0.865919	0.838992	0.879627	0.875308	0.887213	0.909965	0.856388	0.753519	1.03393	0.773068	0.77197	1.00942	1.017	1.03062	1.04872	1.22657	1.16845	1.36143	1.2122	1.27316	1.21375	1.14945	1.50024	1.21599	1.33976	1.23775	1.24993	1.30848	1.32464	1.13816	1.17957	1.19849	1.15504	1.22903	1.21257
PE_36:6 ([M+H]+)		LIPID	-2.25085	-2.23175	-2.11967	-2.20956	-2.32699	-2.2863	-2.29974	-2.21491	-2.10532	-2.07765	-2.35698	-3.47714	-1.81655	-1.82572	-1.81909	-1.91159	-2.00578	-2.07887	-1.8484	-2	-1.54709	-1.97596	-2.15072	-1.52367	-1.44222	-1.44026	-1.47794	-1.40966	-1.50553	-1.08957	-1.36179	-1.3008	-1.3797	-1.7117	-1.08498	-1.87197	-1.6579	-1.82623	-1.91539	-2.0315	-1.92796	-1.77152	-1.65245	-1.57562	-1.61529	-1.73889	-1.75926
PE_36:2 ([M+H]+)		LIPID	-0.58489	-0.517875	-0.544982	-0.678765	-0.590745	-0.474933	-0.710284	-0.710992	-0.741541	-0.772259	-0.752194	-1.91812	-0.885766	-0.913216	-0.898081	-0.848661	-0.833156	-0.853605	-0.834699	-0.983361	-0.640929	-0.97228	-0.817816	-1.0604	-1.0318	-1.01275	-1.00231	-0.831615	-0.941199	-0.934841	-0.940645	-0.749038	-0.851521	-0.842956	-0.812992	-0.534705	-0.432455	-0.53931	-0.500626	-0.479553	-0.513955	-0.464345	-0.548776	-0.491267	-0.638681	-0.486408	-0.609112
PE_36:3 ([M+H]+)		LIPID	-1.95512	-1.74758	-2.32409	-2.21156	-2.45878	-2.33061	-1.5632	-1.57562	-1.74662	-1.93898	-1.91159	-2.83547	-2.01275	-2.06613	-1.96635	-2.17007	-2.23582	-2.15393	-1.66841	-1.77448	-1.46993	-1.85256	-1.72261	-1.31653	-1.15521	-1.34337	-1.03949	-1.14561	-1.16877	-1.53116	-1.48762	-1.36253	-1.27195	-1.37333	-1.34997	-1.01101	-0.96804	-0.97568	-1.04246	-1.14083	-1.22634	-0.971714	-1.03682	-1.07522	-1.09696	-0.928237	-1.13131
PE_36:4 ([M+H]+)		LIPID	2.31562	2.39361	2.37637	2.25375	2.3717	2.45704	2.29213	2.28404	2.24221	2.24771	2.35806	1.47534	2.10893	2.04219	2.09177	2.13291	2.18438	2.19137	2.01493	1.92551	2.18641	1.93418	2.01296	2.15176	2.11503	2.09565	2.15432	2.35482	2.29337	2.1956	2.17884	2.27501	2.20458	2.16646	2.31284	2.49672	2.57476	2.53573	2.53528	2.56076	2.55866	2.47799	2.43488	2.45067	2.38325	2.48091	2.44671
PC_34:5 ([M+H]+)		LIPID	-4.27649	-4.17397	-4.16101	-4.27369	-4.52616	-4.48036	-4.26812	-4.29336	-4.22432	-4.30187	-4.60472	-5.63666	-4.46753	-4.54625	-4.33643	-4.47073	-4.6295	-4.84477	-4.29053	-4.57347	-4.05409	-4.37482	-4.48358	-4.78389	-4.93457	-4.80793	-4.82011	-5.15843	-5.18968	-5.11779	-5.13289	-5.08804	-5.16359	-5.52616	-5.38082	-4.71786	-4.58381	-4.96128	-4.65472	-5.31043	-5.09789	-4.75244	-4.6295	-4.52616	-4.64025	-4.96128	-4.94786
PC_34:6 ([M+H]+)		LIPID	-7.53282	-6.55979	-6.51953	-6.71786	-7.24332	-6.93016	-7.02093	-7.86145	-6.93016	-6.58727	-7.31043	-7.96578	-6.70275	-7.26534	-6.46753	-6.64386	-7.64386	-7.38082	-6.70275	-6.94786	-6.28771	-6.51953	-6.84477	-7.42973	-9.58727	-7.40507	-8.24332	-8.28771	-8.48036	-7.93016	-8.96578	-9.82828	-8.11779	-9.96578	-9.28771	-7.96578	NA	-7.73312	-7.76415	-8.96578	-9.38082	-8.82828	NA	-7.82828	-7.73312	-8.33352	-9.96578
PC_34:1 ([M+H]+)		LIPID	2.21341	2.47952	2.34687	2.24489	2.30141	2.42108	2.51281	2.60644	2.52659	2.39955	2.57289	1.73236	0.803558	0.861797	0.65828	1.04775	1.23069	1.12082	-0.173807	-0.297608	0.0402612	0.143655	-0.425269	2.61485	2.54149	2.45054	2.65457	2.60296	2.67942	2.31866	2.40542	2.32829	2.48944	2.31017	2.46153	2.31586	2.35879	2.36323	2.21073	2.21878	2.18028	2.54646	2.64178	2.65865	2.65835	2.78818	2.61941
PG_36:4 ([M+NH4]+)		LIPID	-6.96578	-6.73312	-6.673	-7.20025	-7.53282	-7.17919	-6.94786	-7.07826	-6.71786	-6.93016	-7.35698	-10.4804	-7.93016	-8.89539	-8.70275	-7.96578	-8.24332	-7.93016	-9.03978	-8.70275	-8.03978	-8.48036	-9.38082	-6.02093	-5.74082	-5.85308	-5.74855	-6.09789	-6.3452	-5.29903	-5.41735	-5.08804	-5.3452	-5.93016	-5.6878	-4.86565	-4.70275	-4.74468	-4.79586	-5.05889	-5.10284	-5.24879	-5.45482	-5.47393	-5.43596	-6.18968	-5.55979
PC_36:3 ([M+H]+)		LIPID	2.03524	2.35075	2.24019	2.1307	2.12928	2.29125	2.27739	2.4431	2.30961	2.21058	2.46174	1.79173	-0.580569	-0.266906	-0.364756	0.137241	0.339935	0.296428	0.31371	0.282973	0.616452	-0.0858948	0.518233	2.45035	2.26409	2.22669	2.44956	2.38579	2.49572	2.39906	2.3924	2.33231	2.49054	2.24668	2.45883	2.56947	2.54221	2.59388	2.48424	2.50604	2.44985	2.4388	2.57306	2.56174	2.59844	2.638	2.54747
PC_36:4 ([M+H]+)		LIPID	4.13845	4.18484	4.17234	4.04116	4.14263	4.2732	4.05991	4.08221	4.01226	4.03404	4.17994	3.46411	3.79546	3.73395	3.81106	3.84666	3.8892	3.90911	3.73696	3.65826	3.86885	3.75013	3.76797	4.00052	4.0354	4.04273	4.12468	4.31551	4.24233	4.16098	4.12496	4.22212	4.12354	4.21572	4.30111	4.42517	4.47167	4.4304	4.46298	4.52715	4.52855	4.3403	4.2965	4.29033	4.21652	4.35187	4.29274
PC_36:5 ([M+H]+)		LIPID	3.52473	3.54614	3.58182	3.43323	3.55795	3.63679	3.42561	3.47725	3.48527	3.50273	3.57168	2.82202	3.52514	3.46356	3.55724	3.50888	3.53699	3.53526	3.51138	3.43099	3.70224	3.49883	3.50437	3.47915	3.50301	3.52887	3.52136	3.7169	3.65925	3.68575	3.59878	3.67223	3.54944	3.55928	3.83794	3.66412	3.79364	3.68659	3.70256	3.73281	3.76507	3.5971	3.64045	3.65342	3.57783	3.66379	3.64122
MGDG_36:4 ([M+NH4]+)		LIPID	-2.36587	-2.36885	-2.25636	-2.36662	-2.19826	-2.29619	-2.13543	-2.08498	-2.10346	-2.05469	-2.19892	-3.10408	-1.61176	-1.80037	-1.77547	-1.80239	-1.75195	-1.71312	-1.16845	-1.26223	-1.0389	-1.3259	-0.933187	-2.41735	-2.48036	-2.37632	-2.35771	-2.4066	-2.41581	-2.59248	-2.70087	-2.44693	-2.50553	-2.25429	-2.52201	-2.20689	-2.23786	-2.32337	-2.19034	-2.37407	-2.35845	-2.17592	-2.36662	-2.21156	-2.44301	-2.4112	-2.53952
MGDG_36:5 ([M+NH4]+)		LIPID	-1.60647	-1.57089	-1.40583	-1.5547	-1.50512	-1.50676	-1.4274	-1.33534	-1.36327	-1.34813	-1.42663	-2.38082	-0.581432	-0.70275	-0.643631	-0.651314	-0.553003	-0.547932	-0.353284	-0.344282	-0.116066	-0.471529	-0.0730897	-1.68966	-1.72023	-1.63621	-1.59771	-1.70322	-1.64115	-1.8646	-2.04811	-1.679	-1.8044	-1.28912	-1.79086	-1.46873	-1.58251	-1.71643	-1.54625	-1.74082	-1.69713	-1.5039	-1.65517	-1.37707	-1.67162	-1.62861	-1.84944
MGDG_36:6 ([M+NH4]+)		LIPID	2.30606	2.3311	2.3525	2.28063	2.47254	2.46422	2.45115	2.4582	2.45231	2.46519	2.54278	1.7442	2.10836	2.02567	2.04054	2.07892	2.14097	2.15672	1.96436	1.9431	2.14838	1.91617	2.00576	1.87884	1.77281	1.80074	1.86128	1.97596	2.03854	1.74795	1.69001	1.87027	1.84101	1.9565	1.93576	1.84068	1.83645	1.71818	1.80843	1.83151	1.82709	1.92459	1.88065	2.01411	1.90477	1.93814	1.86999
PC_36:1 ([M+H]+)		LIPID	-1.21257	-0.869069	-1.08192	-1.12406	-1.19529	-1.02856	-0.998846	-0.838564	-0.945082	-1.13258	-0.990796	-2.12281	-2.59161	-2.52866	-2.67484	-2.41966	-2.39593	-2.49981	-3.49655	-3.60647	-3.22297	-3.27788	-3.76024	-1.00723	-1.08039	-1.13511	-0.913488	-0.99683	-0.985073	-0.951764	-0.853866	-0.863809	-0.748554	-0.91213	-0.903198	-0.815783	-0.808943	-0.730488	-0.948141	-0.882837	-0.961002	-0.627271	-0.624154	-0.556393	-0.564478	-0.364756	-0.650182
GlcADG_36:4 ([M+NH4]+)		LIPID	-4.41427	-4.26534	-4.3629	-4.63308	-4.77992	-5.00694	-4.54288	-4.65109	-4.85726	-4.64025	-4.73697	-5.79586	-6.2109	-7.20025	-6.1078	-6.2109	-6.70275	-6.31043	-6.55979	-6.58727	-6.54625	-6.54625	-6.64386	-5.38082	-5.22162	-5.28209	-5.56661	-5.35107	-5.58035	-4.93016	-5.14305	-4.86986	-5.01625	-5.4933	-5.39289	-4.4112	-4.43909	-4.53952	-4.55979	-5.06854	-4.87408	-5.33352	-5.39289	-5.61529	-5.49981	-6.03032	-6.44222
GlcADG_36:5 ([M+NH4]+)		LIPID	-4.93016	-4.86565	-4.99309	-5.06854	-5.35107	-5.38082	-5.02562	-4.9703	-5.06854	-5.02562	-5.22702	-6.76415	-6.01159	-6.2109	-5.93898	-6.03032	-6.28771	-6.36885	-6.53282	-6.64386	-6.36885	-6.79586	-7.38082	-6.03978	-5.76415	-5.65836	-5.58727	-6.24332	-5.94786	-5.51293	-5.78787	-5.45482	-5.49981	-5.9568	-6.41735	-5.44222	-5.32771	-5.29336	-5.4112	-5.92139	-5.60121	-5.74855	-6.02093	-5.86986	-5.89539	-6.4933	-6.6295
PC_38:1 ([M+H]+)		LIPID	-6.01159	-5.71786	-5.86145	-5.90401	-9.58727	-6.27649	-5.36885	-5.50635	-5.43596	NA	-5.76415	NA	-7.02093	-7.82828	NA	-6.6878	NA	NA	-10.9658	NA	NA	-7.70275	-8.38082	-5.14305	-4.74468	-5.10284	-4.92577	-5.11279	-5.20025	-5.29336	-5.04931	-5.16359	-4.89539	-5.24332	NA	-5.25981	-4.85726	-5.12784	-5.53282	NA	-5.84477	-5.08804	-5.16359	-5.13797	-5.20556	-5.2109	-5.32193
GlcADG_36:2 ([M+NH4]+)		LIPID	-4.49655	-4.38082	-4.45799	-4.76808	-4.91267	-5.11279	-4.92577	-5.02093	-4.84063	NA	-4.95232	-6.17919	-7.05889	-6.13797	NA	-6.48036	NA	-9.82828	-8.58727	-6.86145	-7.02093	NA	-7.35698	-5.77992	-5.9568	-5.53282	-5.53952	-5.92139	-6.11779	NA	-5.98393	-5.42973	NA	-10.1178	-6.74855	-4.93457	-4.97937	-5.01159	-5.08804	-9.70275	NA	NA	-6.06854	NA	-6.40507	NA	NA
Prenylquinone_ubiquinone* (CoQ9) ([M+NH4]+)	C01967	LIPID	NA	-9.11779	-8.96578	-8.82828	-9.38082	-9.82828	-8.24332	-8.42973	-8.64386	-8.24332	-10.1178	-10.9658	NA	NA	-8.24332	-7.89539	-8.53282	NA	NA	NA	-7.22162	NA	-8.38082	NA	NA	-8.76415	-9.58727	-12.2877	-9.28771	NA	NA	-10.1178	-9.58727	-10.2877	-10.1178	-9.96578	NA	-9.82828	-9.11779	-10.9658	-9.58727	NA	-8.53282	-8.07826	-8.48036	-10.1178	NA
PC_38:3 ([M+H]+)		LIPID	-4.04692	-3.86145	-3.91485	-4.60472	-4.14816	-3.92358	-4.03505	-3.81198	-4.08314	-3.88897	-4.08559	-5.06371	NA	NA	NA	NA	NA	NA	NA	NA	NA	NA	NA	-3.84892	-3.38534	-3.56661	-3.44379	-3.49492	-3.56149	-3.28912	-3.34813	-3.0905	-3.22162	-3.36885	-3.28209	-2.80692	-2.59684	-2.70275	-2.72642	-2.84788	-2.90077	-3.06371	-3.25291	-3.24605	-3.32049	-3.36736	-3.37482
ASG_campesteryl (6'-O-palmitoyl) glucoside ([M+NH4]+)		LIPID	-2.27299	-2.19232	-2.17462	-2.24879	-2.24742	-2.27439	-2.44144	-2.40049	-2.33206	-2.2709	-2.47313	-3.50308	-2.244	-2.30543	-2.17072	-2.16488	-2.50226	-2.47794	-2.0807	-2.17267	-1.85569	-2.18902	-2.24469	-2.88577	-2.93677	-2.91921	-2.8997	-2.90401	-3	-3.00926	-3.06613	-2.95121	-2.94786	-3.152	-3.11779	-2.82623	-2.66658	-2.78091	-2.78389	-2.95344	-2.88257	-2.51046	-2.38007	-2.36662	-2.45324	-2.48762	-2.64476
SQDG_34:1 ([M+NH4]+)		LIPID	-5.74855	-6.00231	-5.89539	-6.35698	-6.60121	-6.09789	-5.86986	-5.86145	-6.00231	-5.53952	-5.97483	-6.98393	-6.46753	-7.31043	-6.89539	-6.64386	-8.07826	-7.38082	-8.58727	-8.03978	-7.13797	NA	NA	-5.79586	-5.40507	-5.28771	-6.44222	-6.05889	-5.56661	-6.54625	-6.24332	-6.13797	-6.09789	-8.07826	-6.27649	-5.66566	-6.48036	-6.24332	-6.61529	-6.94786	-6.57347	-5.61529	-5.86986	-5.6295	-6.40507	-5.68038	-5.93016
SQDG_34:2 ([M+NH4]+)		LIPID	-2.96917	-2.37407	-2.71596	-2.79987	-3.16359	-2.62504	-2.70087	-2.31977	-2.61706	-2.64115	-3.25154	NA	-2.58727	-2.73312	-2.79786	-2.80692	-2.69619	NA	NA	NA	-2.73793	-2.57004	-2.75731	-3.50799	-3.69152	-2.86881	-2.93346	-2.96804	-3.06854	-3.26951	-3.38836	-3.32626	-3.76415	-3.14816	-2.9908	-3.04454	-3.00231	-3.4344	-2.82828	-3.60296	-3.67484	-3.05769	-2.47073	-2.82828	-3.51787	-2.8396	-3.46594
SQDG_34:3 ([M+NH4]+)		LIPID	-1.28033	-1.25326	-1.24059	-1.28806	-1.24742	-1.27404	-1.18377	-1.19001	-1.20723	-1.16683	-1.16521	-2.07279	-1.63801	-1.71881	-1.69947	-1.68873	-1.91921	-1.86407	-1.87567	-1.90996	-1.69526	-1.90942	-1.96353	-1.99712	-2.13924	-1.95568	-2.11466	-2.05469	-1.98679	-2.03209	-2.07826	-1.91975	-2.01859	-2.244	-1.99827	-2.12281	-2.09604	-2.15008	-2.31977	-2.39289	-2.31043	-2.16553	-1.99885	-1.87885	-1.96748	-2.11841	-2.17853
ASG_beta-sitosteryl (6'-O-palmitoyl) glucoside ([M+NH4]+)		LIPID	0.0450235	0.100843	0.133695	0.0343566	0.15056	0.235237	0.073409	0.112233	0.0756011	0.157691	0.19232	-0.458386	-0.0182934	-0.0576919	0.0270125	0.0281448	0.0114956	0.0106366	0.086512	0.0832474	0.257011	0.0398403	0.156008	-0.189187	-0.284019	-0.282965	-0.166503	-0.0881934	-0.0528949	-0.397828	-0.351995	-0.324816	-0.279634	-0.288241	-0.190009	-0.369967	-0.349787	-0.426625	-0.41889	-0.423913	-0.408704	-0.277534	-0.203402	-0.150721	-0.206395	-0.158429	-0.292829
TAG_50:4 ([M+NH4]+)		LIPID	-4.46435	-4.43284	-4.52616	-4.57691	-4.70275	-4.5632	-3.79186	-4.04692	-4.09296	-4.08559	-4.1976	-5.64386	-5.12281	-5.31617	-5.50635	-5.2709	-5.21625	-5.53952	-4.74082	-4.91702	-4.6878	-5.07826	-4.84477	-4.52616	-4.22432	-4.38383	-4.2029	-4.50635	-4.28209	-4.64025	-4.6878	-4.14051	-4.38082	-4.42973	-4.63308	-4.19496	-4.21893	-4.36587	-4.22432	-4.70275	-4.59074	-4.75244	-4.82828	-4.97937	-5.23243	-5.79586	-5.12784
ASG_campesteryl (6'-O-oleoyl) glucoside ([M+NH4]+)		LIPID	NA	NA	NA	-5.29336	NA	-4.88683	NA	NA	-5.2109	NA	-5.22702	-9.96578	NA	NA	-6.51953	-5.65109	NA	-5.87832	-9.82828	-7.22162	-8.53282	NA	-6.17919	-4.20025	-3.99539	-4.08559	-4.06613	-4.05649	-3.96804	-3.77596	-3.82828	-3.86355	-3.84892	-4.02093	-3.73697	-4.02327	-3.88683	-3.92577	-4.1818	-4.05889	-4.21625	-4.04931	-4.05889	-4.23243	-4.62238	-4.3452	-4.66566
TAG_50:5 ([M+NH4]+)		LIPID	-5.03505	-4.89539	NA	-5.28771	-5.58727	-5.07339	-4.61883	-4.82828	-4.79186	-4.77201	-5.15843	-6.04931	-5.56661	-5.77992	-5.71028	-5.6878	-5.72547	-5.74082	-4.9703	NA	-4.97483	-5.53952	-5.26534	-6.03978	NA	-6.09789	-9.58727	-6.32193	-6.2109	NA	NA	NA	NA	NA	-6.79586	NA	NA	NA	NA	NA	-6.09789	NA	NA	-6.6878	-6.94786	NA	-7.20025
ASG_campesteryl (6'-O-linolenoyl) glucoside ([M+NH4]+)		LIPID	-3.96804	-3.71596	-3.8427	-3.77398	-4.25429	-4.01859	-4.44536	-4.32482	-4.21893	-4.23243	-4.5632	-5.81198	-3.7819	-3.94342	-3.6206	-3.88683	-4.13797	-4.24879	-3.54793	-3.7084	-3.1367	-3.50799	-3.72166	-5.09296	-4.96128	-4.80793	-4.96128	-4.98393	-5.11779	-5.12784	-4.93016	-4.79987	-4.81198	-5.76415	-5.49981	-4.37183	-4.54962	-4.699	-4.54288	-5.44851	-4.4933	-4.26257	-4.12532	-3.98622	-4.22972	-4.42973	-4.50308
ASG_campesteryl (6'-O-linoleoyl) glucoside ([M+NH4]+)		LIPID	-9.96578	NA	-6.76415	-6.22162	-6.82828	-6.53282	NA	NA	-7.55979	-6.70275	-7.22162	-9.58727	-5.93016	-6.07826	-6.03032	-6.15843	-6.26534	NA	-5.6878	-5.82011	-5.16877	-5.85308	-6.36885	NA	-9.96578	-6.38082	-6.41735	-6.86145	NA	-6.01159	NA	-7.48036	-6.18968	-6.55979	-7.00231	NA	NA	-5.96578	-6.2109	-6.82828	-6.4933	NA	NA	-5.553	-5.77992	-6.26534	-6.18968
PI_34:2 ([M+NH4]+)		LIPID	-0.688497	-0.628831	-0.565332	-0.658811	-0.524708	-0.604937	-0.697359	-0.729053	-0.786373	-0.683854	-0.521183	-1.71501	-0.914303	-1.03771	-0.966348	-0.875407	-0.886033	-0.979089	-1.15072	-1.24059	-1.00433	-1.0511	-1.08589	-0.947584	-0.803645	-0.781653	-0.58208	-0.703454	-0.749766	-0.790609	-0.79636	-0.595751	-0.768322	-0.839596	-0.670704	-0.590093	-0.526369	-0.501443	-0.444576	-0.53575	-0.577767	-0.611976	-0.606474	-0.558729	-0.602088	-0.609112	-0.684318
TAG_50:1 ([M+NH4]+)		LIPID	-4.0613	-3.95009	-4.07097	-4.26812	-4.32771	-4.24332	-3.14688	-3.27369	-3.37183	-3.36438	-3.63129	-4.11029	-6.03032	-5.97483	-6.673	-5.57347	-5.74855	-6.46753	NA	NA	-6.45482	-6.40507	NA	-2.32482	-1.83856	-2.23379	-1.70134	-2.14624	-1.91757	-2.78787	-2.58122	-2.32626	-2.24948	-2.14816	-2.64476	-2.5632	-2.55639	-2.5039	-2.77992	-2.93677	-3.02444	-2.44536	-2.53199	-2.91267	-2.83033	-2.43518	-2.76906
PI_34:3 ([M+NH4]+)		LIPID	-1.94175	-1.89647	-1.75536	-1.84736	-1.84322	-1.95512	-1.96466	-1.92413	-1.87567	-1.70416	-1.78438	-2.94898	-1.83908	-1.90509	-1.79736	-1.78986	-1.94397	-2.01859	-2.01742	-2.08498	-1.77497	-1.85413	-2.01042	-2.13353	-2.15136	-2.04275	-1.94786	-2.15521	-2.15008	-2.12469	-2.13416	-2.01159	-2.11904	-2.32626	-2.04157	-2.27858	-2.19166	-2.24332	-2.19892	-2.47073	-2.45482	-2.14433	-1.98622	-1.83084	-1.8879	-2.1047	-2.16942
TAG_52:1 ([M+NH4]+)		LIPID	NA	NA	-5.65109	-6.03978	-5.97483	-6.27649	NA	NA	-4.8039	-5.27649	-5.61529	-6.87832	-7.79586	-7.61529	-11.7027	-7.24332	NA	-7.40507	-8.07826	-8.42973	-7.96578	-7.64386	-8.64386	-4.15072	-3.75049	-4.02562	-3.49655	-3.96804	-3.84892	-4.49005	-4.10036	-3.83856	-3.73504	-3.74855	-4.29903	-3.8997	-3.94564	-3.73312	-4.12029	-4.39593	-4.40813	-3.81198	-3.89325	-4.18705	-4.07339	-3.76219	-4.18968
TAG_52:3 ([M+NH4]+)		LIPID	-1.95344	-1.69013	-1.93181	-1.99769	-2.04573	-1.92084	-1.0081	-1.19001	-1.31617	-1.4089	-1.32916	-2.08192	-4.88257	-4.30187	-4.91702	-3.89325	-4.25981	-4.53952	-4.22972	-4.65836	-4.1976	-5.54625	-4.29619	-0.785129	-0.304184	-0.461363	-0.0513992	-0.259806	-0.146563	-0.897275	-0.888434	-0.286304	-0.410428	0.226139	-0.594443	0.0511633	0.0885487	0.0226164	0.0413832	-0.122177	-0.0561912	-0.419662	-0.70228	-0.973696	-1.10222	-0.597496	-0.882571
TAG_52:4 ([M+NH4]+)		LIPID	0.937796	0.999423	0.903964	0.77011	1.02567	1.10702	1.48594	1.31092	1.22429	1.30071	1.40436	0.389897	-0.0661253	-0.289651	-0.254806	-0.0136255	0.0409625	0.121413	0.471344	0.284633	0.510152	0.081476	0.751121	0.802731	1.08066	1.0644	1.28131	1.30135	1.45838	0.930094	0.891963	1.45465	1.3072	1.72836	1.15724	1.64685	1.675	1.60478	1.72273	1.63557	1.69622	1.04341	0.78785	0.52667	0.387804	0.739934	0.660381
Chlorophyll_pheophytin a ([M+H]+)	C05797	LIPID	-1.13892	-1.33388	-1.14784	-1.16974	-0.975113	-1.03386	-0.975964	-0.879648	-1.07036	-1.0315	-0.903198	-2.23379	-1.41581	-1.63129	-1.62149	-1.61661	-1.64566	-1.51705	-1.73456	-1.67162	-1.41388	-1.77596	-1.54456	-2.19297	-2.51622	-2.3555	-2.27509	-2.35402	-2.21424	-2.53199	-2.57777	-2.20689	-2.37482	-2.33789	-2.42353	-2.3452	-2.60472	-2.82011	-2.63039	-2.97143	-2.81604	-2.26812	-2.37857	-2.09111	-2.27928	-2.3629	-2.65927
TAG_52:5 ([M+NH4]+)		LIPID	0.673466	0.744678	0.70558	0.597603	0.851279	0.869792	1.24562	1.13185	1.11523	1.22836	1.23879	0.28759	0.278698	0.082975	0.171207	0.261832	0.351854	0.401521	0.778293	0.600079	0.886979	0.439357	0.989866	0.532068	0.681314	0.712023	0.808591	0.885652	1.06901	0.742092	0.683382	1.18979	1.01121	1.288	1.00885	1.00108	1.00705	0.941933	0.988339	0.959993	1.03161	0.324465	0.195474	0.0447438	-0.109514	0.0713508	0.129613
PI_36:2 ([M+NH4]+)		LIPID	-4.30757	-4.26257	-4.12029	-4.14305	-4.43909	-4.49655	-4.48681	-4.49655	-4.55639	-4.51293	-4.65836	-5.9568	-4.52284	-4.63308	-4.58727	-4.33935	-4.66933	-4.91267	-4.77992	-4.85726	-4.54625	-4.673	-5.04931	-4.78389	-4.58035	-4.52949	-4.27928	-4.64025	-5.16359	-4.50308	-4.49005	-4.19232	-4.33352	-4.73312	-4.53617	-3.96804	-3.86355	-3.79186	-3.79786	-4.01859	-4.15329	-4.07339	-4.13797	-4.09789	-4.13037	-4.30757	-4.35698
TAG_54:9 ([M+NH4]+)		LIPID	-1.56704	-1.50308	-1.43948	-1.56235	-1.55597	-1.61131	-1.53116	-1.55682	-1.48722	-1.39973	-1.75731	-3.07218	-1.02005	-0.976248	-0.882571	-0.935117	-1.1504	-1.20091	-0.551733	-0.673923	-0.281036	-0.819597	-0.68177	-2.39517	-2.52201	-2.59248	-2.5345	-2.65109	-2.74758	-3.19892	-3.18442	-3.0221	-3.01159	-2.94898	-3.23786	-3.35255	-3.37782	-3.54962	-3.27649	-3.67484	-3.59597	-3.22972	-3.03741	-2.5632	-2.92906	-3.44066	-3.57863
TAG_54:5 ([M+NH4]+)		LIPID	-1.52866	-1.36327	-1.66749	-1.76317	-1.63711	-1.50881	-0.870915	-1.15489	-1.3797	-1.46554	-1.35956	-2.17592	-2.93457	-3.15843	-3.03032	-3.07218	-3.20158	-3.01742	-2.40202	-2.59423	-2.19363	-2.80591	-2.34081	-1.35587	-1.01537	-1.00405	-0.632853	-0.827512	-0.810207	-1.37595	-1.63442	-0.90996	-1.10998	-0.228537	-1.43831	0.310224	0.359746	0.263876	0.496922	0.193456	0.279293	-0.859876	-1.30258	-1.37146	-1.59379	-1.43557	-1.54667
TAG_54:6 ([M+NH4]+)		LIPID	1.71756	1.82216	1.69153	1.54947	1.74739	1.8337	1.74962	1.54181	1.48893	1.49047	1.57459	0.437228	0.299596	0.28558	0.29537	0.445833	0.288418	0.298541	0.387804	0.25544	0.531968	0.189413	0.42707	0.535854	0.773574	0.792855	0.987394	0.976144	1.09633	0.278936	0.107286	0.754717	0.578214	1.17466	0.320773	1.4984	1.52361	1.41246	1.7301	1.54498	1.55768	0.454386	0.10916	0.155231	-0.106094	0.0143553	-0.0521469
TAG_54:7 ([M+NH4]+)		LIPID	2.07676	2.15387	2.08563	1.92934	2.13613	2.20013	2.05085	1.90458	1.91395	1.92797	1.9318	0.845992	1.40152	1.35067	1.43061	1.46895	1.37083	1.36356	1.63218	1.51591	1.77556	1.37884	1.62658	0.798092	0.897163	0.883386	0.999062	1.05922	1.16472	0.369718	0.240131	0.773574	0.633292	1.1432	0.518031	1.31359	1.31115	1.18479	1.514	1.33199	1.43301	0.520347	0.365133	0.579566	0.278936	0.278342	0.187894
TAG_54:8 ([M+NH4]+)		LIPID	1.02871	1.10507	1.0939	0.94875	1.17754	1.18212	1.04432	0.91892	0.958063	1.01057	0.919149	-0.275612	0.945008	0.932968	1.03696	1.04075	0.926303	0.899794	1.28747	1.1762	1.49835	1.0352	1.2728	-0.196442	-0.265691	-0.224486	-0.204233	-0.155052	-0.111072	-0.812232	-0.85909	-0.488836	-0.632853	-0.165693	-0.726186	-0.259461	-0.264824	-0.396119	-0.0878867	-0.267774	-0.148001	-0.688497	-0.70322	-0.346115	-0.684782	-0.818834	-0.939538
TAG_54:1 ([M+NH4]+)		LIPID	NA	NA	-7.76415	-8.76415	-9.03978	NA	-6.77992	NA	-4.71407	-7.96578	-8.20025	-8.48036	NA	-13.2877	-10.9658	NA	NA	NA	-10.2877	-13.2877	-9.82828	NA	NA	-5.64386	-4.86986	-5.40507	-4.86565	-5.89539	-5.25429	NA	NA	-5.65836	-5.20556	-5.1078	-5.78787	NA	-5.04931	-5.25429	-5.33935	-5.77201	-6.03032	NA	NA	-5.6295	-5.77992	-5.70275	-5.96578
TAG_54:2 ([M+NH4]+)		LIPID	-4.32193	-4.15586	-4.26534	-4.49981	-4.67669	-4.33935	-3.62593	-3.65836	-3.73312	-3.85726	-3.98622	-4.80793	-5.56661	-5.78787	-6.03978	-5.71028	-5.8039	-5.64386	-5.17397	-5.41735	-4.94786	-5.51293	-5.00231	-3.43909	-2.8997	-3.09912	-2.82113	-2.99539	-2.9737	-2.89218	-2.78687	-2.41812	-2.53199	-2.50144	-2.88257	-2.35181	-2.2863	-2.34666	-2.44379	-2.53701	-2.4933	-2.68409	-2.89218	-3.42043	-3.39289	-3.04811	-3.19628
TAG_54:3 ([M+NH4]+)		LIPID	-4.07582	-3.8365	-4.02562	-4	-4.36885	-4.1078	-3.43596	-3.57863	-3.64566	-3.86565	-3.92577	NA	NA	NA	NA	NA	NA	NA	NA	NA	NA	NA	NA	-3.08804	-2.70275	-2.89647	-2.49248	-2.69059	-2.75438	-3.03386	-2.94231	-2.42818	-2.52616	-2.08192	-2.87938	-1.90077	-1.92577	-1.88683	-1.93567	-2.11654	-2.17462	-2.35845	-2.7084	-2.97483	-3.05409	-2.67946	-3.01508
TAG_54:4 ([M+NH4]+)		LIPID	-0.925495	-0.803897	-0.922757	-1.09943	-1.05499	-0.861972	-0.882039	-0.997982	-1.0598	-1.0619	-0.971997	-2.00405	-2.39289	-2.55894	-2.58035	-2.39517	-2.66292	-2.53366	-2.12281	-2.37333	-1.96072	-2.45482	-2.08865	-1.76268	-1.51581	-1.54456	-1.32121	-1.33461	-1.25154	-1.52118	-1.53324	-0.955676	-1.14274	-0.770043	-1.4309	-0.52824	-0.499198	-0.523255	-0.47915	-0.533451	-0.541828	-1.1743	-1.41966	-1.68641	-1.77448	-1.57004	-1.68409
TAG_56:4 ([M+NH4]+)		LIPID	-3.51787	-3.47233	-3.55131	-3.67116	-3.74275	-3.70087	-3.03978	-3.25291	-3.34373	-3.30329	-3.43129	-4.11279	-4.86145	-5.25981	-5.3629	-5.1078	-5.23243	-5.1078	-4.74855	-5.16359	-4.66933	-5.06371	-4.88257	-3.152	-2.68966	-2.85413	-2.47714	-2.55724	-2.63039	-2.6206	-2.62149	-1.99539	-2.23854	-2.0315	-2.53533	-1.63891	-1.59248	-1.63801	-1.65018	-1.72404	-1.79786	-2.44615	-2.75926	-3.24059	-3.28069	-2.94675	-3.11154
TAG_56:5 ([M+NH4]+)		LIPID	-3.86145	-3.78588	-3.82011	-4.06613	-4.14305	-3.93677	-3.1818	-3.41273	-3.36142	-3.36736	-3.47554	-4.22702	NA	NA	NA	-4.90833	NA	NA	-4.65472	-4.77992	-4.46116	-4.86145	NA	-3.40507	-2.9908	-3.05289	-2.8879	-3.04931	-2.91159	-2.70181	-2.76709	-2.23447	-2.36364	-2.32337	-2.6056	-2.12469	-2.08559	-2.131	-2.20689	-2.26327	-2.27718	-2.95904	-3.24332	-3.76808	-3.66933	-3.55131	-3.50471
DGDG_34:6 ([M+NH4]+)		LIPID	-4.06854	-4.01159	-4.02562	-4.20025	-4.35402	-4.3629	-3.82623	-3.95232	-3.99539	-3.8762	-4.27928	-5.51953	-5.15843	-4.93898	-5.00694	-5.07826	-5.22702	-5.48681	-5.2109	-5.29903	-4.96578	-5.4112	-5.44851	-5.09789	-5.09296	-5.05889	-4.92139	-5.27649	-5.22162	-5.52616	-5.673	-5.38082	-5.46753	-6.07826	-5.76415	-5.16877	-5.15843	-5.25429	-5.36885	-5.77201	-5.54625	-5.53952	-5.68038	-5.35107	-5.46116	-5.84477	-5.93016
DGDG_34:2 ([M+NH4]+)		LIPID	-0.994241	-0.893786	-0.963532	-1.06915	-1.00752	-0.994241	-0.620601	-0.651541	-0.693621	-0.628831	-0.810966	-1.62638	-1.06945	-1.10067	-1.0604	-1.01013	-1.11685	-1.15779	-1.09419	-1.14178	-0.826489	-1.13574	-1.1805	-1.15008	-1.23718	-1.21056	-1.16327	-1.22904	-1.12721	-1.73025	-1.70463	-1.61927	-1.50758	-1.60296	-1.61838	-1.27893	-1.16618	-1.30045	-1.18246	-1.38647	-1.27544	-1.20689	-1.19859	-1.08589	-1.21257	-1.25981	-1.3441
TAG_56:2 ([M+NH4]+)		LIPID	NA	-5.53952	-5.70275	-5.72547	-6.3452	-6.15843	-5.01159	-5.22162	-5.53952	-5.09296	-5.33935	-6.22162	NA	-7.17919	-8.11779	-7.28771	-7.73312	-9.03978	-7.28771	-7.31043	-6.74855	NA	-7.24332	-5.40507	-4.80793	-5.02093	-4.70275	-4.65109	-5.00231	-4.81604	-4.77201	-4.24605	-4.43909	-4.44222	-4.74855	-4.17658	-4.13543	-4.12784	-4.20025	-4.33352	-4.38987	-4.50964	-5.01625	NA	-5.22702	-5.01159	-5.6295
DGDG_34:3 ([M+NH4]+)		LIPID	0.225152	0.275722	0.24184	0.168642	0.325386	0.349931	0.464145	0.441483	0.383829	0.387032	0.434455	-0.460965	-0.112163	-0.207728	-0.204898	-0.155052	-0.103767	-0.152163	-0.392516	-0.418119	-0.157946	-0.453044	-0.452057	0.0353424	0.00590296	0.0163537	0.0728604	0.16092	0.176067	-0.310075	-0.349787	-0.225835	-0.217591	-0.256011	-0.177229	-0.338615	-0.22803	-0.36012	-0.3655	-0.377444	-0.342817	-0.0310614	-0.0886536	-0.0300299	-0.10656	-0.074912	-0.134319
TAG_58:4 ([M+NH4]+)		LIPID	-4.90401	-4.86565	-4.79186	-5.03032	-5.35698	-5.1078	-4.43284	-4.64025	-4.69152	-4.60121	-4.76808	-5.6878	-6.98393	NA	NA	-7.09789	-7.38082	-9.03978	-6.6295	-10.1178	-9.96578	-6.84477	-7.33352	-5.28209	-4.62593	-4.69526	-4.29619	NA	NA	-4.673	-4.38383	-3.87197	-4.00694	-4.02797	NA	-3.50471	-3.45799	-3.45958	-3.47554	-3.72547	-3.62772	-4.27928	-4.4112	NA	-4.95232	NA	NA
DGDG_36:5 ([M+NH4]+)		LIPID	-3.34373	-3.41273	-3.17788	-3.38836	-3.38987	-3.40049	-3.09173	-3.08314	-3.0807	-3.15457	-3.44851	-4.74082	-2.02915	-2.17397	-2.08498	-1.99309	-2.02503	-1.97483	-1.92303	-1.89862	-1.62327	-1.98279	-1.74082	-3.20689	-3.45324	-3.37782	-3.38836	-3.6295	-3.58208	-3.75828	-3.76808	-3.49005	-3.45641	-3.59248	-3.92577	-3.38836	-3.4066	-3.55131	-3.41273	-3.71217	-3.69713	-2.81502	-2.80289	-2.5121	-2.72929	-2.95568	-3.05529
TAG_58:5 ([M+NH4]+)		LIPID	-4.72929	-4.61176	-4.57691	-4.86986	-4.9703	-4.9568	-4.33643	-4.35698	-4.40202	-4.25429	-4.59771	-5.86145	NA	NA	NA	NA	-6.673	NA	NA	NA	-5.76415	-6.65836	NA	-4.93898	-4.6295	-4.59074	-4.40202	-4.70275	-4.84063	-4.28209	-4.46435	-3.84892	-4.04931	-4.24879	-4.3629	-3.65472	-3.68409	-3.72929	-3.75438	-3.9771	-3.9703	-4.673	-4.59074	-5.16359	-5.21625	-5.33352	-5.20025
DGDG_36:6 ([M+NH4]+)		LIPID	1.26778	1.29942	1.33228	1.24981	1.39435	1.41749	1.39758	1.42137	1.41007	1.42315	1.46462	0.599413	1.26778	1.22398	1.23536	1.23897	1.24031	1.2561	1.16401	1.11343	1.38383	1.08345	1.17082	0.886745	0.687688	0.746915	0.758474	0.862114	0.933648	0.586885	0.512075	0.658646	0.671656	0.685895	0.742265	0.792439	0.834307	0.723777	0.76528	0.707171	0.743644	0.912727	0.904195	1.04565	0.889941	0.915865	0.828307
Prenylquinone_alpha-tocopherol* ([M+H]+)		LIPID	-2.74178	-2.6878	-2.73793	-2.82726	-2.88683	-2.83547	-2.662	-2.68873	-2.82113	-2.71123	-2.79086	-3.34081	-2.19694	-2.32699	-2.22837	-2.36142	-2.45087	-2.38836	-2.00578	-2.02797	-1.9845	-2.07948	-2.09665	-3.10532	-3.31617	-3.40354	-3.39897	-3.5412	-3.44693	-3.96128	-3.69152	-4.05649	-3.87408	-4	-3.99769	-4	-3.97256	-4.03978	-4.18442	-4.21357	-4.1976	-3.14178	-3.11654	-2.99309	-3.12406	-3.32626	-3.23514
Carotenoid_beta-apo-8'-carotenal* ([M+H]+)		LIPID	0.601031	0.651867	0.63914	0.669843	0.608431	0.532666	0.650765	0.689746	0.643672	0.626673	0.626205	1.1101	0.772392	0.839476	0.851119	0.774924	0.656725	0.778461	0.809332	0.860129	0.711054	0.864255	0.657274	0.82855	0.772055	0.613249	0.761541	0.581496	0.67726	0.759071	0.823586	0.618896	0.756853	0.61551	0.686344	0.549718	0.477574	0.610511	0.605305	0.602457	0.498864	0.482022	0.6072	0.598842	0.617393	0.473735	0.524666
lysoPC_18:2 ([M+H]+)		LIPID	-4.61529	-4.75244	-4.9703	-5.03978	-4.93457	-4.73697	-4.81604	-4.8997	-5.14816	-4.92139	-5.40507	-5.53282	-4.95232	-5.18968	-5.04454	-5.12784	-5.31617	-5.11779	-4.99769	-5.02562	-4.86565	-4.8039	-5.57347	-5.16359	NA	-5.15843	-5.53282	-4.96128	-5.22162	-5.43596	-5.54625	-4.90833	-5.27649	-5.85308	-5.41735	-5.22162	-5.00694	-5.17919	-5.26534	-5.53282	-5.60121	-4.9703	-5.25429	-5.28209	-5.51293	-5.58035	-5.60121
lysoPC_16:0 ([M+H]+)		LIPID	-4.22162	-4.22702	-4.24605	-4.22972	-4.44536	-4.31905	-4.02797	-4.08804	-4.03032	-4.07097	-4.47073	-4.83239	-4.19496	-4.1078	-4.0807	-4.15329	-4.3452	-4.37782	-3.79186	-3.86355	-3.73697	-4.13797	-4.32771	-4.2109	-4.24879	-4.0517	-4.29336	-4.19496	-4.23514	-4.6878	-4.41735	-4.17658	-4.41427	-4.36885	-4.46435	-4.79987	-4.63308	-4.75633	-4.79987	-4.90833	-5.06854	-4.38685	-4.30757	-4.58381	-4.48358	-4.71028	-4.96578
PC_20:0 (Int. Std.) ([M+H]+)		LIPID	0	0	0	0	0	0	0	0	0	0	0	0	0	0	0	0	0	0	0	0	0	0	0	0	0	0	0	0	0	0	0	0	0	0	0	0	0	0	0	0	0	0	0	0	0	0	0
SG_sitosteryl glucoside* ([M+NH4]+)		LIPID	-2.58901	-2.52036	-2.51128	-2.57347	-2.69713	-2.65836	-2.61352	-2.56235	-2.50308	-2.52118	-2.68038	-3.42818	-2.94786	-3.00231	-2.87303	-2.94786	-3.19628	-3.33497	-2.77992	-2.85935	-2.64566	-2.8879	-2.9737	-3.33789	-3.55979	-3.51293	-3.44536	-3.68223	-3.50308	-3.74082	-3.71028	-3.61176	-3.56832	-3.9771	-3.8997	-3.9412	-3.96578	-4.09296	-3.9908	-4.4112	-4.28771	-3.76808	-3.662	-3.47393	-3.53952	-3.90401	-3.97483
SG_stigmasteryl glucoside* ([M+NH4]+)		LIPID	-4.92577	-4.88257	-5.03978	-4.91267	-5.25429	-5.15843	-4.66566	-4.72166	-4.71786	-4.78389	-5.22162	-6.27649	-6.31043	-6.13797	-6.12784	-6.03978	-6.41735	-6.58727	-6.33352	-6.48036	-5.91267	-6.05889	-6.39289	-4.99769	-4.662	-4.75633	-4.62238	-4.73312	-4.89111	-4.42663	-4.50635	-4.43596	-4.46116	-4.72166	-4.56661	-4.15586	-4.00926	-4.0807	-4.09789	-4.39897	-4.47714	-4.51953	-4.55639	-4.80793	-4.74082	-4.84477	-4.94786
DAG_34:1 ([M+NH4]+)		LIPID	-3.36142	-3.09296	-3.2723	-3.58381	-3.60999	-3.59597	-2.89004	-2.90293	-2.99539	-3.37632	-3.52782	-4.673	-4.4112	-4.47714	-4.64386	-4.28771	-4.45166	-4.49655	-4.9703	-5.38685	-4.80793	-5.05409	-5.48681	-2.24811	-2.04157	-2.25429	-2.00926	-2.29477	-2.21223	-2.35402	-2.41043	-2.35034	-2.24811	-2.46993	-2.58381	-2.17723	-2.00578	-2.09357	-2.29265	-2.64386	-2.61087	-1.93291	-1.94453	-2.0315	-2.04931	-1.94564	-2.14369
DAG_34:2 ([M+NH4]+)		LIPID	0.242206	0.37529	0.294547	-0.0700575	0.0875986	0.215244	0.238053	0.258217	0.121811	-0.0194628	-0.111228	-1.76857	0.201383	-0.0436459	-0.0694519	-0.0149368	0.0094905	0.137635	0.392317	0.13711	0.41846	0.116232	0.339708	0.297602	0.457542	0.431356	0.473423	0.574828	0.603312	0.467697	0.378179	0.553164	0.418244	0.474566	0.543397	0.92873	1.03415	0.886043	0.887759	0.759241	0.887915	0.890252	0.806035	0.773406	0.630033	0.782492	0.605684
PC_34:2 ([M+H]+)		LIPID	4.26779	4.3196	4.31321	4.21042	4.33927	4.42134	4.29039	4.30953	4.27326	4.29699	4.39998	3.63614	4.14164	4.07559	4.1384	4.17447	4.20261	4.22532	4.12522	4.06804	4.28222	4.06776	4.16854	4.24705	4.30223	4.30883	4.36843	4.5548	4.50236	4.31964	4.29872	4.37478	4.31221	4.4302	4.49844	4.43117	4.51663	4.44443	4.47684	4.52642	4.53959	4.4952	4.4673	4.45977	4.39983	4.55814	4.45498
PC_34:3 ([M+H]+)		LIPID	2.83758	2.85738	2.95008	2.82825	2.99765	3.01717	2.88166	2.97231	3.01268	3.06745	3.06587	2.33171	3.15552	3.1061	3.14991	3.10839	3.13924	3.14493	3.21034	3.15932	3.40699	3.13272	3.21478	2.76967	2.66061	2.71112	2.65835	2.8678	2.86898	2.74915	2.71877	2.69446	2.6821	2.68264	2.98596	2.44374	2.54891	2.40308	2.41235	2.47884	2.52795	2.51111	2.66015	2.76645	2.67564	2.73047	2.67378
PC_34:4 ([M+H]+)		LIPID	-2.16294	-2.13606	-2.11591	-2.17007	-2.27649	-2.22567	-2.06552	-2.00694	-1.98793	-1.98507	-2.09296	-3.25291	-2.08375	-2.18902	-2.14497	-2.08927	-2.07036	-2.21893	-2.1623	-2.34154	-1.93291	-2.17658	-2.25154	-2.06673	-2.09296	-2.07704	-2.13479	-2.0905	-2.17984	-2.14752	-2.24537	-2.21424	-2.2723	-2.54456	-2.2029	-2.06552	-1.87461	-2.1367	-2.07522	-2.2863	-2.152	-1.7539	-1.71881	-1.63263	-1.7269	-1.69479	-1.8049
Prenylquinone_plastoquinone-9 (PQ9) ([M+NH4]+)	C10385	LIPID	-1.19133	-1.21223	-1.31617	-1.55131	-1.54878	-1.51169	-0.766603	-0.903468	-1.05409	-1.04752	-1.21759	-2.27788	-1.05289	-1.17658	-1.24366	-1.2382	-1.18541	-1.41928	-0.957636	-0.947584	-0.755844	-1.1756	-1.05949	-1.12627	-1.13479	-1.14242	-1.1805	-1.32229	-1.17756	-1.3555	-1.24571	-1.21893	-1.35956	-1.55724	-1.61043	-1.77201	-1.68966	-1.83444	-1.97087	-2.26534	-2.11092	-1.5951	-1.57949	-1.50594	-1.60647	-1.78339	-1.75779
PG_34:1 ([M+NH4]+)		LIPID	-4.20823	-4.00694	-3.99539	-4.04692	-4.42973	-4.3629	-3.5649	-3.57175	-3.59771	-3.76611	-4.11279	-4.73697	-5.13797	-4.86565	-5.3452	-4.50964	-4.93016	-5.06371	-6.16877	-6.05889	-5.93016	-5.93016	-6.53282	-3.12281	-3.02562	-3.12658	-2.85935	-3.20823	-3.29336	-3.57004	-3.64566	-3.50471	-3.4344	-3.56661	-3.74082	-3.42973	-3.26396	-3.19363	-3.41735	-3.70087	-3.82419	-2.4066	-2.5649	-2.486	-2.54709	-2.49492	-2.8427
MGDG_34:5 ([M+NH4]+)		LIPID	-4.92577	-4.93016	-5.11279	-4.57004	-5.05889	-5.17397	-3.71786	-4.3452	-4.72166	-5.54625	-5.06854	-5.75633	NA	NA	NA	NA	-5.82828	-5.65109	-4.88683	NA	-4.63308	-4.95232	NA	-4.49655	-3.74855	-3.72547	-3.53952	-3.83444	-3.80793	-5.07826	-5.32193	-4.47714	-4.8365	-3.88683	-4.9703	-3.88257	-3.83033	-4.0517	-3.74662	-3.76808	-3.88044	-3.42198	-3.83856	-3.89754	-4.00462	-3.30329	-4.04692
PG_34:2 ([M+NH4]+)		LIPID	-1.00868	-0.962969	-1.02885	-1.14019	-1.10532	-1.03505	-0.94536	-1.03801	-1.10067	-1.09943	-1.05649	-2.03268	-1.83599	-1.88577	-1.9203	-1.70698	-1.82113	-1.87938	-2.02856	-2.10284	-1.92522	-2.12469	-2.23379	-0.723325	-0.534914	-0.528032	-0.420048	-0.291239	-0.419469	-0.388355	-0.483178	-0.281211	-0.386657	-0.469729	-0.32572	-0.300626	-0.216753	-0.224486	-0.241953	-0.273866	-0.284194	-0.384207	-0.456405	-0.583376	-0.58814	-0.466736	-0.474332
MGDG_34:6 ([M+NH4]+)		LIPID	0.877823	0.910733	0.904272	0.807932	0.992478	1.03012	1.11942	1.10514	1.03281	1.05936	1.15536	0.250962	0.0581086	-0.0385989	-0.0281162	-0.0394883	0.0313952	-0.0694519	-0.270904	-0.269686	-0.046176	-0.309359	-0.235484	0.255682	0.30871	0.321928	0.390778	0.459641	0.525067	0.0366088	-0.0960362	0.0966667	0.0130692	-0.0133342	0.136716	0.275484	0.361768	0.176067	0.269632	0.151599	0.221815	0.0499095	-0.0175631	-0.00621696	-0.0691491	-0.0383026	-0.0727862
PG_34:3 ([M+NH4]+)		LIPID	-1.58294	-1.52243	-1.57433	-1.64656	-1.61308	-1.5632	-1.47393	-1.53324	-1.54878	-1.49167	-1.59641	-2.80289	-2.43362	-2.52782	-2.52367	-2.49167	-2.66109	-2.74082	-2.82726	-2.91485	-2.56576	-2.92906	-3.18968	-1.72881	-1.60253	-1.5649	-1.58078	-1.49777	-1.57046	-1.3655	-1.53784	-1.27753	-1.42973	-1.72881	-1.29584	-1.53324	-1.4089	-1.50676	-1.5154	-1.74034	-1.65608	-1.78438	-1.79887	-1.85361	-1.82674	-1.91485	-1.89004
MGDG_34:3 ([M+NH4]+)		LIPID	-2.13163	-2.074	-2.20889	-2.2304	-2.07157	-2.09357	-1.67254	-1.80995	-1.93291	-1.95904	-1.94953	-2.82113	-4.39897	-4.44851	NA	-4.06854	-4.39897	NA	NA	NA	NA	NA	NA	-3.04335	-2.58208	-2.59335	-2.57777	-2.52036	-2.74758	-3.17267	-3.25017	-2.92577	-3.21759	-2.88364	-3.06371	-3.08192	-3.06371	-3.21223	-3.15329	-3.28209	-3.31617	-2.3357	-2.55131	-2.68223	-2.71596	-2.43051	-2.89754
Prenylquinone_plastochromanol-8 (PC-8) ([M+NH4]+)		LIPID	-4.21625	-4.1976	-4.13289	-4.34813	-4.65109	-4.47073	-3.82623	-3.95232	-4.02093	-3.82215	-4.26534	-5.72547	-3.74855	-3.79186	-3.87197	-3.91921	-4.02562	-4.19232	-3.46116	-3.54962	-3.22297	-3.62593	-3.59771	-4.71786	-4.96128	-4.86986	-5.02093	-5.28771	-5.30472	-5.77992	-5.673	-5.68038	-5.52616	-6.22162	-6.01159	-6.38082	-6.28771	-6.84477	-6.74855	-7.07826	-7.26534	-5.11779	-4.89111	-4.58381	-4.78389	-5.29336	-5.31043
PC_36:6 ([M+H]+)		LIPID	1.10755	1.12816	1.24562	1.10896	1.1915	1.26069	0.931834	1.02524	1.10949	1.19036	1.19169	0.325271	1.40376	1.35236	1.47534	1.32447	1.3301	1.32786	1.42019	1.34557	1.69283	1.44297	1.39144	1.25701	1.19705	1.29965	1.20958	1.44408	1.35055	1.47202	1.33451	1.33623	1.23426	1.12876	1.66102	0.95977	1.17274	0.984772	0.98156	1.02155	1.1036	0.935686	1.07416	1.19055	1.09882	1.11417	1.12545
PC_36:2 ([M+H]+)		LIPID	1.92657	1.99404	1.99928	1.87507	1.95866	2.06292	1.7629	1.78211	1.76825	1.76804	1.84338	0.838185	1.6565	1.59264	1.6643	1.68001	1.69082	1.72722	1.681	1.56081	1.89087	1.62476	1.74295	1.59708	1.61932	1.65067	1.72526	1.89844	1.79327	1.74885	1.71035	1.90747	1.79983	1.92554	1.89685	2.11313	2.22262	2.16018	2.18679	2.19871	2.19994	2.16311	2.05374	2.08328	1.99251	2.18495	2.00259
Polyisoprenoid_undecaprenol* ([M+NH4]+)	C01968	LIPID	NA	-8.20025	-8.64386	-9.03978	-9.03978	NA	NA	NA	-8.64386	-9.82828	-9.38082	-10.7027	-8.11779	-8.07826	-8.58727	-8.58727	-8.33352	-8.48036	-7.79586	-7.70275	-7.20025	-7.53282	-8.24332	-7.22162	-7.13797	-7.22162	-8.00231	-7.35698	-7.35698	-6.89539	NA	NA	-7.07826	-7.33352	-7.45482	NA	-5.92139	-6.03978	-6.22162	-6.93016	-6.673	NA	-6.70275	-6.6878	-6.87832	-7.45482	-6.94786
TAG_50:2 ([M+NH4]+)		LIPID	-1.31115	-1.21591	-1.25705	-1.46037	-1.29584	-1.24298	-0.536378	-0.655172	-0.721896	-0.587923	-0.540988	-1.47634	-2.26188	-2.56405	-2.53366	-2.25705	-2.33862	-2.191	-1.66109	-1.90077	-1.66933	-2.09665	-1.43792	-0.546245	-0.114504	-0.251195	0.0102069	-0.00955335	0.118227	-0.342451	-0.246395	0.164529	0.063641	0.205393	-0.0417141	-0.101753	-0.0658232	-0.0534937	-0.173482	-0.203901	-0.131787	-0.287008	-0.460171	-0.966348	-0.920844	-0.460568	-0.546878
TAG_50:3 ([M+NH4]+)		LIPID	-2.41427	-2.32409	-2.28912	-2.49411	-2.41812	-2.3474	-1.61971	-1.64747	-1.61264	-1.48116	-1.63173	-2.54288	-2.88897	-3.25429	-3.15714	-3.08314	-3.11404	-3.03268	-2.30116	-2.49086	-2.29974	-2.79586	-2.15907	-1.74952	-1.47714	-1.54582	-1.36662	-1.50022	-1.29053	-1.4856	-1.46514	-1.15136	-1.19232	-1.30864	-1.21257	-1.7471	-1.75926	-1.80642	-1.97256	-2.06673	-1.98279	-2.01217	-2.00984	-2.42818	-2.35771	-2.2029	-2.20756
ASG_beta-sitosteryl (6'-O-linolenoyl) glucoside ([M+NH4]+)		LIPID	-0.811979	-0.670934	-0.679227	-0.8604	-0.76366	-0.662004	-0.866436	-0.855954	-0.859876	-0.793357	-0.860661	-2.01101	-1.02621	-1.09943	-0.944527	-0.949812	-1.04662	-1.16683	-0.78687	-0.819088	-0.55385	-0.863546	-0.754626	-1.06401	-1.06613	-1.02562	-0.975964	-0.910231	-0.99683	-1.01567	-1.00289	-0.799621	-0.905899	-1.03505	-0.925769	-0.731206	-0.689427	-0.794107	-0.775466	-0.927963	-0.822656	-1.04067	-0.96917	-0.946194	-1.03623	-1.0265	-1.18902
SQDG_36:6 ([M+NH4]+)		LIPID	-4.25154	-4.20556	-4.11528	-4.19232	-4.27369	-4.36885	-4.07582	-4.0905	-4.07826	-4.05409	-4.29336	-5.46753	-5.01625	-5.16877	-5.18968	-5.31617	-5.87832	-5.76415	-5.61529	-5.8039	-5.37482	-5.86145	-6.50635	-5.42353	NA	-5.49981	NA	-6.03032	-5.65109	NA	-5.43596	-5.22162	-5.32193	-5.70275	-5.42973	-5.15329	-5.23243	-5.32193	-5.10284	-5.86145	-5.44851	NA	NA	-5.60823	-5.79586	-6.07826	-6.24332
ASG_beta-sitosteryl (6'-O-linoleoyl) glucoside ([M+NH4]+)		LIPID	-2.35181	-2.25843	-2.31186	-2.35624	-2.38157	-2.41273	-2.29124	-2.29619	-2.25498	-2.24811	-2.53282	-3.79987	-2.45403	-2.52284	-2.38911	-2.40583	-2.67669	-2.83033	-2.17397	-2.37034	-1.80642	-2.23379	-2.3681	-1.94619	-1.73793	-1.75779	-1.72499	-1.553	-1.73552	-1.4489	-1.51416	-1.35698	-1.40775	-1.59771	-1.38383	-0.977668	-0.820616	-0.922757	-0.929611	-1.07613	-0.997405	-1.5649	-1.62861	-1.79336	-1.81655	-1.87197	-1.84425
PI_34:1 ([M+NH4]+)		LIPID	-5.71786	-5.47393	-5.36885	-5.42973	-5.60823	NA	-5.16359	-5.43596	-5.39897	-5.51293	-6.03032	-6.46753	-6.6878	-6.82828	-6.48036	-6.2109	-6.73312	-7.13797	-7.05889	-7.17919	-6.91267	-6.87832	-7.24332	-4.67669	-4.25705	-4.36587	-3.94564	-4.48681	-4.68038	-4.84477	-4.79586	-4.77596	-4.55979	-4.93898	-4.95232	-4.87832	-4.77201	-4.65836	-4.85308	-5.20556	-5.17919	-4.50308	-4.42663	-4.3452	-4.29053	-4.41735	-4.77596
SQDG_36:3 ([M+NH4]+)		LIPID	-4.662	-4.57347	-4.52616	-4.76415	-4.8039	-4.91267	-4.68409	-4.92577	-4.92139	-4.77201	-4.99769	-6.14816	-4.90401	-5.2109	-5.4112	-5.13797	-5.32771	-5.15843	-5.13289	-5.14816	-5.16359	-5.24332	NA	-5.673	-5.8039	-5.74855	-5.68038	-6.41735	-6.04931	-6.23243	-5.82828	-5.82828	-5.673	-6.26534	-6.79586	-5.60121	NA	-6.22162	-5.51953	-6.05889	-6.25429	-5.49981	-5.6295	-5.32771	-5.48681	-6.48036	-6.06854
ASG_beta-sitosteryl (6'-O-stearoyl) glucoside ([M+NH4]+)		LIPID	-1.87303	-1.79086	-1.75975	-1.93843	-1.90185	-1.80541	-2.0807	-2.11654	-2.0607	-2.03623	-2.18246	-3.39593	-2.03327	-2.06613	-1.97937	-2.00868	-2.15393	-2.26951	-1.77152	-1.8997	-1.51087	-1.85308	-1.79586	-2.69619	-2.80692	-2.75926	-2.61617	-2.74275	-2.73504	-2.92139	-2.88683	-2.71596	-2.66292	-2.98165	-2.8365	-2.65836	-2.61883	-2.72452	-2.75244	-2.91702	-2.90077	-2.37333	-2.33935	-2.18902	-2.30757	-2.40583	-2.59161
ASG_beta-sitosteryl (6'-O-oleoyl) glucoside ([M+NH4]+)		LIPID	-4.4933	-4.10284	-4.39897	-4.40202	-4.11279	-4.27928	-3.87197	-4.04216	-4.06613	-4.42043	NA	NA	NA	NA	NA	NA	NA	NA	-7.55979	NA	NA	NA	NA	-3.88044	-3.72547	-3.9771	-3.63308	-3.81807	-3.83856	-4.1818	-4.14051	-3.97256	-3.851	-3.83444	-3.89754	-3.54456	-3.31905	-3.24605	-3.33789	-3.44066	-3.40354	-3.94564	-4.02562	-4.06613	-4.13797	-4.24605	-4.11528
SQDG_36:5 ([M+NH4]+)		LIPID	-4.46753	-4.47393	-4.36587	-4.46753	-4.75244	-4.55979	-4.47073	-4.32771	-4.48358	-4.37782	-4.51622	NA	-4.54625	-4.64747	-4.49981	-4.51293	-4.86986	-5.02562	-4.44851	-4.58381	-4.18968	-4.66566	-4.89539	-5.16359	NA	-5.23786	-5.11779	-5.48681	-5.36885	-4.92139	-5.13797	-4.92577	-4.90401	-5.36885	-5.53952	-4.84892	-4.82011	-5.19496	-5.00231	-5.64386	-5.33352	-5.22702	NA	-4.95232	-5.18442	-5.75633	-6.05889
TAG_52:6 ([M+NH4]+)		LIPID	-1.33279	-1.29124	-1.30722	-1.38308	-1.20656	-1.21424	-0.740577	-0.794858	-0.748796	-0.655626	-0.776454	-1.78936	-1.18475	-1.41542	-1.28912	-1.29903	-1.2605	-1.22533	-0.668639	-0.795859	-0.522634	-1.00897	-0.547299	-1.34446	-1.31437	-1.30365	-1.33898	-1.32409	-1.09789	-1.17299	-1.28349	-0.909689	-1.04067	-0.996254	-1.02356	-1.39555	-1.42701	-1.55047	-1.52201	-1.69432	-1.55809	-1.90725	-1.85831	-1.90617	-2.0607	-2.20689	-2.08314
TAG_52:7 ([M+NH4]+)		LIPID	-3.45166	-3.50308	-3.4852	-3.62593	-3.70275	-3.73889	-3.3629	-3.58554	-3.53784	-3.46116	-3.85935	-5.11779	-3.89325	-4.11779	-3.95456	-3.88683	-4.2029	-4.40507	-3.73504	-3.92139	-3.48843	-3.99309	-4.04692	-4.89539	-4.91267	-4.77992	-4.78787	-5.1078	-5.01159	-5.57347	-5.49981	-5.03505	-5.2109	-5.92139	-6.05889	-4.5632	-4.56661	-4.82011	-4.54962	-5.3452	-5.25429	-5.2109	-5.43596	-5.01625	-5.38082	-5.93898	-6.17919
TAG_52:2 ([M+NH4]+)		LIPID	-2.1805	-2.07522	-2.14752	-2.38233	-2.37333	-2.30045	-1.87461	-1.95792	-2.07704	-2.0517	-2.02034	-2.95009	-3.46275	-3.72356	-3.74082	-3.49655	-3.64386	-3.54625	-2.87197	-3.16488	-2.91485	-3.43596	-2.93898	-1.93843	-1.53074	-1.76709	-1.46953	-1.55937	-1.49696	-1.69245	-1.57519	-1.18442	-1.31689	-1.15811	-1.55554	-1.07188	-1.07036	-1.03949	-1.21659	-1.21692	-1.22432	-1.29867	-1.49574	-1.91104	-1.8831	-1.5492	-1.73552
PI_36:4 ([M+NH4]+)		LIPID	-5.35107	-5.22162	-5.22162	-5.32771	-5.43596	-5.50635	-5.33352	-5.55979	-5.59423	-5.42973	-6.55979	-7.33352	-5.87832	NA	-6.05889	-5.76415	-6.11779	-6.42973	-6.50635	-6.45482	-6.07826	-6.17919	-6.33352	-5.08314	-4.82828	-4.86565	-4.59771	-5.05889	-5.20025	-4.57347	-4.71028	-4.35993	-4.50964	-5.06854	-4.64386	-3.95009	-3.76808	-3.8365	-3.82623	-4.40202	-4.24059	-4.20823	-4.33935	-4.3452	-4.49005	-4.72166	-4.64025
DGDG_36:2 ([M+NH4]+)		LIPID	-3.16877	-3.0905	-3.09296	-3.2709	-3.4112	-3.20956	-2.90833	-2.9737	-3.02093	-2.96241	-3.2723	-4.33643	-3.30615	-3.35402	-3.38082	-3.21893	-3.47875	-3.57175	-3.13037	-3.21491	-2.85413	-3.2723	-3.28209	-3.93898	-4.03268	-3.97483	-4	-4.09789	-4.04454	-4.38685	-4.40202	-4.27649	-4.08559	-4.34227	-4.39897	-3.78389	-3.71786	-3.85517	-3.74855	-3.98165	-3.95232	-3.73312	-3.74275	-3.58727	-3.79586	-3.99539	-4.00694
DGDG_36:3 ([M+NH4]+)		LIPID	-2.07218	-2.04752	-2.07097	-2.11341	-2.11591	-2.09173	-2.00347	-2.02915	-2.10656	-2.0499	-2.15008	-3.04097	-2.0625	-2.11341	-2.09974	-2.08253	-2.20956	-2.2049	-2.12218	-2.17137	-1.86512	-2.18836	-2.21625	-2.63487	-2.72356	-2.71028	-2.71312	-2.71217	-2.85726	-3.10408	-3.08192	-2.9885	-2.93788	-3.03623	-3.12784	-2.96016	-2.88897	-2.95568	-2.97256	-3.02093	-3.14561	-2.44536	-2.5345	-2.34446	-2.50635	-2.61617	-2.69432
DGDG_36:4 ([M+NH4]+)		LIPID	-3.8427	-3.79586	-3.75633	-3.79586	-3.97256	-3.92577	-3.46275	-3.40966	-3.56832	-3.48681	-3.98165	-4.662	-3.23379	-3.2723	-3.21491	-3.16101	-3.43909	-3.39897	-3.04216	-3.03623	-2.82931	-3.12784	-3.11404	-3.76611	-3.93236	-3.85517	-3.82623	-4.06613	-4.00231	-4.1078	-4.11029	-4.08314	-3.90833	-4.25154	-4.22972	-3.78986	-3.74855	-3.9412	-3.73504	-4.1976	-4.11029	-3.81604	-3.79786	-3.55979	-3.73504	-3.99539	-4.17919
TAG_60:5 ([M+NH4]+)		LIPID	NA	NA	NA	-6.18968	-6.87832	-6.04931	NA	-4.90401	NA	-5.44222	NA	NA	NA	NA	-8.64386	-9.28771	NA	-9.96578	NA	NA	-9.96578	-8.58727	-8.11779	-6.24332	NA	-5.77992	-5.86145	-5.85308	-5.62238	-5.06854	-5.24879	-4.47073	-4.69152	NA	-4.87408	-4.4933	-4.32771	-4.50635	-4.44536	-4.68409	NA	-5.73312	-5.74082	-6.28771	-6.79586	-6.55979	-6.71786
Neoxantin	C08606	CARO	-3.662	-3.85726	-3.85726	-3.85726	-3.75633	-3.79586	-3.85726	-3.81604	-4.05889	-3.8997	-3.75633	-4.64386	-3.92139	-4.13289	-4.2109	-4.1078	-3.94342	-4.03505	-3.9885	-4.08314	-3.81604	-4.1078	-3.92139	-4.64386	-4.8365	-5.01159	-5.01159	-5.01159	-4.8365	-5.26534	-5.26534	-5.32193	-5.26534	-4.92139	-5.32193	-5.15843	-5.1078	-5.64386	-5.38082	-5.32193	-5.50635	-4.75633	-4.71786	-4.53952	-4.87832	-4.8365	-4.8365
Violaxanthin	C08614	CARO	-3	-3.05889	-2.95456	-2.9885	-2.9105	-2.95456	-3.47393	-3.4112	-3.36587	-3.23786	-3.17137	-4.23786	-3.13289	-3.29336	-3.22432	-3.14561	-3.05889	-3.23786	-3.36587	-3.53952	-3.17137	-3.44222	-3.42663	-3.94342	-4.15843	-4.03505	-4.23786	-4.18442	-4.05889	-4.87832	-4.87832	-4.68038	-4.75633	-4.57347	-4.8365	-4.60823	-4.47393	-4.64386	-4.57347	-4.57347	-4.64386	-3.9885	-4.05889	-3.71786	-4.01159	-3.94342	-4.08314
Lutein	C08601	CARO	-1.11404	-1.15521	-1.08009	-1.1016	-1.00868	-1.03505	-1.09851	-1.1016	-1.12343	-1.04692	-1.00578	-2.02327	-1.61706	-1.77596	-1.76121	-1.6529	-1.51457	-1.71312	-1.68038	-1.79586	-1.52284	-1.81097	-1.5951	-2.2109	-2.38836	-2.17137	-2.34373	-2.35845	-2.07704	-2.2723	-2.45008	-2.03505	-2.24469	-2.12658	-2.27928	-2.2863	-2.34373	-2.6529	-2.35845	-2.54793	-2.46594	-2.33643	-2.39593	-2.06492	-2.2863	-2.35107	-2.48197
beta-Carotene	C02094	CARO	-1.61264	-1.61706	-1.55639	-1.58208	-1.49005	-1.54372	-1.77103	-1.80591	-1.81604	-1.74662	-1.71786	-2.78588	-2.22432	-2.35107	-2.33643	-2.25154	-2.1016	-2.32193	-2.38836	-2.49818	-2.14561	-2.55639	-2.30045	-2.85726	-2.96578	-2.74662	-2.9771	-2.94342	-2.68966	-2.94342	-3.02327	-2.68038	-2.95456	-2.92139	-2.88897	-2.85726	-2.94342	-3.22432	-2.95456	-3.09542	-3.07097	-2.80591	-2.87832	-2.57347	-2.75633	-2.85726	-2.8997
Chlorophyll A	C05306|D06465	CARO	1.15316	1.11902	1.25761	1.2455	1.29572	1.27441	1.05381	1.03844	1.06901	1.18078	1.20351	0.16221	0.621993	0.462576	0.525067	0.645241	0.778209	0.552869	0.555816	0.341417	0.756169	0.414677	0.687956	-0.0649175	-0.237864	-0.00723157	-0.152003	-0.199255	0.120352	-0.289827	-0.373327	-0.0484122	-0.249822	0.00863031	-0.227692	-0.229382	-0.321928	-0.584241	-0.32916	-0.465938	-0.430509	-0.0603973	-0.14401	0.21661	-0.00433459	-0.0846703	-0.215915
Chlorophyll B	C05307	CARO	-0.833927	-0.883635	-0.72738	-0.72977	-0.708396	-0.736966	-0.798366	-0.78339	-0.768568	-0.680382	-0.662004	-1.68966	-1.30757	-1.47794	-1.37333	-1.29336	-1.16488	-1.34373	-1.36216	-1.50226	-1.12029	-1.47393	-1.17462	-2.01159	-2.14561	-1.9771	-2.05289	-2.1078	-1.81097	-2.31473	-2.38082	-2.04692	-2.2109	-1.85204	-2.26534	-2.18442	-2.32193	-2.6529	-2.29336	-2.47393	-2.51457	-2.05889	-2.16488	-1.73216	-2.05289	-2.06492	-2.27928
[truncated: 136 more columns]

## Sheet: Dataset S3
Dataset S3. Gene ontology (GO) enrichment analysis using genes in the represent modules.
sliaa9_M2
query	significant	p_value	term_size	query_size	intersection_size	precision	recall	term_id	source	term_name	effective_domain_size	source_order	parents
query_1	TRUE	0.00178155	358	58	10	0.172414	0.027933	GO:0005576	GO:CC	extracellular region	11057	248	GO:0110165
query_1	TRUE	0.0173954	1807	92	23	0.25	0.0127283	GO:0016491	GO:MF	oxidoreductase activity	17191	3569	GO:0003824
sliaa9_M3
query	significant	p_value	term_size	query_size	intersection_size	precision	recall	term_id	source	term_name	effective_domain_size	source_order	parents
query_1	TRUE	1.4222e-13	907	55	27	0.490909	0.0297685	GO:0009507	GO:CC	chloroplast	11057	724	GO:0009536
query_1	TRUE	4.28144e-13	948	55	27	0.490909	0.028481	GO:0009536	GO:CC	plastid	11057	752	GO:0005737, GO:0043231
query_1	TRUE	3.37056e-12	225	64	16	0.25	0.0711111	GO:0015979	GO:BP	photosynthesis	13422	5642	GO:0044237
query_1	TRUE	1.77971e-11	183	55	14	0.254545	0.0765027	GO:0009535	GO:CC	chloroplast thylakoid membrane	11057	751	GO:0009534, GO:0055035
query_1	TRUE	1.77971e-11	183	55	14	0.254545	0.0765027	GO:0055035	GO:CC	plastid thylakoid membrane	11057	2576	GO:0031976, GO:0042651
query_1	TRUE	1.04227e-10	208	55	14	0.254545	0.0673077	GO:0042651	GO:CC	thylakoid membrane	11057	2081	GO:0034357
query_1	TRUE	1.11318e-10	209	55	14	0.254545	0.0669856	GO:0009534	GO:CC	chloroplast thylakoid	11057	750	GO:0009507, GO:0031976
query_1	TRUE	1.11318e-10	209	55	14	0.254545	0.0669856	GO:0031976	GO:CC	plastid thylakoid	11057	1457	GO:0009536, GO:0009579, GO:0031984
query_1	TRUE	1.20709e-09	249	55	14	0.254545	0.0562249	GO:0034357	GO:CC	photosynthetic membrane	11057	1707	GO:0009579, GO:0016020
query_1	TRUE	2.70091e-08	28	64	7	0.109375	0.25	GO:0009765	GO:BP	photosynthesis, light harvesting	13422	4127	GO:0006091, GO:0019684
query_1	TRUE	3.28478e-08	319	55	14	0.254545	0.0438871	GO:0009579	GO:CC	thylakoid	11057	777	GO:0005622
query_1	TRUE	8.30043e-08	64	55	8	0.145455	0.125	GO:0009523	GO:CC	photosystem II	11057	739	GO:0009521
query_1	TRUE	1.77698e-07	123	64	10	0.15625	0.0813008	GO:0019684	GO:BP	photosynthesis, light reaction	13422	6931	GO:0006091, GO:0015979
query_1	TRUE	3.39581e-07	111	55	9	0.163636	0.0810811	GO:0009521	GO:CC	photosystem	11057	737	GO:0034357, GO:0098796
query_1	TRUE	6.49978e-07	38	35	8	0.228571	0.210526	KEGG:00710	KEGG	Carbon fixation in photosynthetic organisms	2496	117	KEGG:00000
query_1	TRUE	1.97463e-06	391	64	14	0.21875	0.0358056	GO:0006091	GO:BP	generation of precursor metabolites and energy	13422	2131	GO:0044237
query_1	TRUE	1.16157e-05	590	55	15	0.272727	0.0254237	GO:0031984	GO:CC	organelle subcompartment	11057	1464	GO:0043227, GO:0043229, GO:0110165
query_1	TRUE	1.42934e-05	49	55	6	0.109091	0.122449	GO:0009522	GO:CC	photosystem I	11057	738	GO:0009521
query_1	TRUE	5.31775e-05	4153	55	39	0.709091	0.0093908	GO:0005737	GO:CC	cytoplasm	11057	392	GO:0005622, GO:0110165
query_1	TRUE	0.000138272	42	68	5	0.0735294	0.119048	GO:0016168	GO:MF	chlorophyll binding	17191	3451	GO:0046906
query_1	TRUE	0.000171348	57	64	6	0.09375	0.105263	GO:0009620	GO:BP	response to fungus	13422	4004	GO:0051707
query_1	TRUE	0.000238035	176	55	8	0.145455	0.0454545	GO:0009526	GO:CC	plastid envelope	11057	742	GO:0009536, GO:0031967
query_1	TRUE	0.000380778	15	64	4	0.0625	0.266667	GO:0009768	GO:BP	photosynthesis, light harvesting in photosystem I	13422	4130	GO:0009765
query_1	TRUE	0.000476095	23	55	4	0.0727273	0.173913	GO:0010287	GO:CC	plastoglobule	11057	811	GO:0009570, GO:0110165
query_1	TRUE	0.000592408	13	35	4	0.114286	0.307692	KEGG:00196	KEGG	Photosynthesis - antenna proteins	2496	21	KEGG:00000
query_1	TRUE	0.000599146	149	35	10	0.285714	0.0671141	KEGG:01200	KEGG	Carbon metabolism	2496	183	KEGG:00000
query_1	TRUE	0.00108947	176	64	8	0.125	0.0454545	GO:0044419	GO:BP	biological process involved in interspecies interaction between organisms	13422	12832	GO:0008150
query_1	TRUE	0.00169706	165	55	7	0.127273	0.0424242	GO:0009941	GO:CC	chloroplast envelope	11057	798	GO:0009507, GO:0009526
query_1	TRUE	0.00189758	48	64	5	0.078125	0.104167	GO:0018298	GO:BP	protein-chromophore linkage	13422	6194	GO:0006464
query_1	TRUE	0.0020176	33	35	5	0.142857	0.151515	KEGG:00195	KEGG	Photosynthesis	2496	20	KEGG:00000
query_1	TRUE	0.00210548	49	64	5	0.078125	0.102041	GO:0050832	GO:BP	defense response to fungus	13422	15411	GO:0009620, GO:0098542
query_1	TRUE	0.00222571	1189	35	28	0.8	0.0235492	KEGG:01100	KEGG	Metabolic pathways	2496	180	KEGG:00000
query_1	TRUE	0.00621998	202	55	7	0.127273	0.0346535	GO:0009570	GO:CC	chloroplast stroma	11057	769	GO:0009507, GO:0009532
query_1	TRUE	0.00819119	211	55	7	0.127273	0.0331754	GO:0009532	GO:CC	plastid stroma	11057	748	GO:0009536, GO:0110165
query_1	TRUE	0.00896335	466	55	10	0.181818	0.0214592	GO:0098796	GO:CC	membrane protein complex	11057	3642	GO:0016020, GO:0032991
query_1	TRUE	0.0125382	177	64	7	0.109375	0.039548	GO:0009416	GO:BP	response to light stimulus	13422	3935	GO:0009314
query_1	TRUE	0.0144833	181	64	7	0.109375	0.038674	GO:0009314	GO:BP	response to radiation	13422	3908	GO:0009628
query_1	TRUE	0.0168781	111	68	5	0.0735294	0.045045	GO:0016830	GO:MF	carbon-carbon lyase activity	17191	3810	GO:0016829
query_1	TRUE	0.0279297	25	68	3	0.0441176	0.12	GO:0004568	GO:MF	chitinase activity	17191	1163	GO:0004553
query_1	TRUE	0.0311241	875	64	14	0.21875	0.016	GO:0005975	GO:BP	carbohydrate metabolic process	13422	2018	GO:0044238, GO:0071704
query_1	TRUE	0.0328717	455	64	10	0.15625	0.021978	GO:0009628	GO:BP	response to abiotic stimulus	13422	4010	GO:0050896
query_1	TRUE	0.0378313	358	55	8	0.145455	0.0223464	GO:0005576	GO:CC	extracellular region	11057	248	GO:0110165
query_1	TRUE	0.0499783	6	68	2	0.0294118	0.333333	GO:0042132	GO:MF	fructose 1,6-bisphosphate 1-phosphatase activity	17191	6624	GO:0050308
sldella_M1
query	significant	p_value	term_size	query_size	intersection_size	precision	recall	term_id	source	term_name	effective_domain_size	source_order	parents
query_1	TRUE	0.00468093	403	115	12	0.104348	0.0297767	GO:0016798	GO:MF	hydrolase activity, acting on glycosyl bonds	17191	3781	GO:0016787
query_1	TRUE	0.00472532	1807	115	28	0.243478	0.0154953	GO:0016491	GO:MF	oxidoreductase activity	17191	3569	GO:0003824
query_1	TRUE	0.00753313	34	25	4	0.16	0.117647	KEGG:00280	KEGG	Valine, leucine and isoleucine degradation	2496	32	KEGG:00000
query_1	TRUE	0.00801458	110	69	6	0.0869565	0.0545455	GO:0048046	GO:CC	apoplast	11057	2535	GO:0005576
query_1	TRUE	0.0168948	32	115	4	0.0347826	0.125	GO:0016762	GO:MF	xyloglucan:xyloglucosyl transferase activity	17191	3750	GO:0046527
query_1	TRUE	0.04743	358	69	9	0.130435	0.0251397	GO:0005576	GO:CC	extracellular region	11057	248	GO:0110165
sldella_M2
query	significant	p_value	term_size	query_size	intersection_size	precision	recall	term_id	source	term_name	effective_domain_size	source_order	parents
query_1	TRUE	5.02756e-13	302	25	13	0.52	0.0430464	GO:0007049	GO:BP	cell cycle	13422	2976	GO:0009987
query_1	TRUE	1.27065e-09	35	19	6	0.315789	0.171429	GO:0000307	GO:CC	cyclin-dependent protein kinase holoenzyme complex	11057	59	GO:1902554
query_1	TRUE	4.16756e-09	248	25	10	0.4	0.0403226	GO:0022402	GO:BP	cell cycle process	13422	7604	GO:0007049, GO:0009987
query_1	TRUE	5.47597e-09	44	19	6	0.315789	0.136364	GO:1902554	GO:CC	serine/threonine protein kinase complex	11057	4016	GO:1902911
query_1	TRUE	8.30431e-09	47	19	6	0.315789	0.12766	GO:1902911	GO:CC	protein kinase complex	11057	4042	GO:0061695
query_1	TRUE	1.19253e-08	34	25	6	0.24	0.176471	GO:0008284	GO:BP	positive regulation of cell population proliferation	13422	3582	GO:0008283, GO:0042127, GO:0048522
query_1	TRUE	1.30313e-08	69	25	7	0.28	0.101449	GO:0007346	GO:BP	regulation of mitotic cell cycle	13422	3239	GO:0000278, GO:0051726
query_1	TRUE	1.72292e-08	36	25	6	0.24	0.166667	GO:0042127	GO:BP	regulation of cell population proliferation	13422	11590	GO:0008283, GO:0050794
query_1	TRUE	2.04245e-08	127	25	8	0.32	0.0629921	GO:0000280	GO:BP	nuclear division	13422	120	GO:0048285
query_1	TRUE	8.67937e-08	152	25	8	0.32	0.0526316	GO:0048285	GO:BP	organelle fission	13422	14716	GO:0006996
query_1	TRUE	8.80358e-08	90	25	7	0.28	0.0777778	GO:0010564	GO:BP	regulation of cell cycle process	13422	4729	GO:0022402, GO:0051726
query_1	TRUE	1.06975e-07	48	25	6	0.24	0.125	GO:0007088	GO:BP	regulation of mitotic nuclear division	13422	3012	GO:0007346, GO:0010564, GO:0051783, GO:0140014
query_1	TRUE	1.38188e-07	50	25	6	0.24	0.12	GO:0071900	GO:BP	regulation of protein serine/threonine kinase activity	13422	19875	GO:0045859
query_1	TRUE	1.7661e-07	52	25	6	0.24	0.115385	GO:0008283	GO:BP	cell population proliferation	13422	3581	GO:0009987
query_1	TRUE	1.7661e-07	52	25	6	0.24	0.115385	GO:0051783	GO:BP	regulation of nuclear division	13422	16147	GO:0000280, GO:0033043
query_1	TRUE	3.06423e-07	178	25	8	0.32	0.0449438	GO:0000278	GO:BP	mitotic cell cycle	13422	118	GO:0007049
query_1	TRUE	6.01038e-07	118	25	7	0.28	0.059322	GO:0051338	GO:BP	regulation of transferase activity	13422	15835	GO:0050790
query_1	TRUE	6.48989e-07	42	26	5	0.192308	0.119048	GO:0016538	GO:MF	cyclin-dependent protein serine/threonine kinase regulator activity	17191	3601	GO:0019887
query_1	TRUE	7.6002e-07	122	25	7	0.28	0.057377	GO:0033043	GO:BP	regulation of organelle organization	13422	9238	GO:0006996, GO:0051128
query_1	TRUE	1.25287e-06	131	25	7	0.28	0.0534351	GO:0051726	GO:BP	regulation of cell cycle	13422	16123	GO:0007049, GO:0050794
query_1	TRUE	2.38339e-06	54	26	5	0.192308	0.0925926	GO:0019887	GO:MF	protein kinase regulator activity	17191	4627	GO:0019207
query_1	TRUE	3.14592e-06	57	26	5	0.192308	0.0877193	GO:0019207	GO:MF	kinase regulator activity	17191	4541	GO:0030234
query_1	TRUE	3.4392e-06	58	26	5	0.192308	0.0862069	GO:0019901	GO:MF	protein kinase binding	17191	4634	GO:0019900
query_1	TRUE	4.05627e-06	155	25	7	0.28	0.0451613	GO:1903047	GO:BP	mitotic cell cycle process	13422	26154	GO:0000278, GO:0022402
query_1	TRUE	4.45161e-06	61	26	5	0.192308	0.0819672	GO:0019900	GO:MF	kinase binding	17191	4633	GO:0019899
query_1	TRUE	4.64554e-06	132	19	6	0.315789	0.0454545	GO:0061695	GO:CC	transferase complex, transferring phosphorus-containing groups	11057	2653	GO:1990234
query_1	TRUE	4.99986e-06	42	25	5	0.2	0.119048	GO:0000079	GO:BP	regulation of cyclin-dependent protein serine/threonine kinase activity	13422	39	GO:0071900, GO:1904029
query_1	TRUE	4.99986e-06	42	25	5	0.2	0.119048	GO:1904029	GO:BP	regulation of cyclin-dependent protein kinase activity	13422	27028	GO:0045859, GO:0051726
query_1	TRUE	5.75408e-06	163	25	7	0.28	0.0429448	GO:0051128	GO:BP	regulation of cellular component organization	13422	15655	GO:0016043, GO:0050794
query_1	TRUE	6.29041e-06	93	25	6	0.24	0.0645161	GO:0051301	GO:BP	cell division	13422	15801	GO:0009987
query_1	TRUE	7.15422e-06	45	25	5	0.2	0.111111	GO:0045787	GO:BP	positive regulation of cell cycle	13422	13564	GO:0007049, GO:0048522, GO:0051726
query_1	TRUE	7.62252e-06	96	25	6	0.24	0.0625	GO:0140014	GO:BP	mitotic nuclear division	13422	23016	GO:0000280, GO:1903047
query_1	TRUE	8.27438e-06	377	26	8	0.307692	0.0212202	GO:0030234	GO:MF	enzyme regulator activity	17191	4787	GO:0098772
query_1	TRUE	1.05859e-05	178	25	7	0.28	0.0393258	GO:0031399	GO:BP	regulation of protein modification process	13422	8327	GO:0006464, GO:0032268
query_1	TRUE	1.46619e-05	107	25	6	0.24	0.0560748	GO:0045859	GO:BP	regulation of protein kinase activity	13422	13626	GO:0001932, GO:0043549
query_1	TRUE	1.55054e-05	108	25	6	0.24	0.0555556	GO:0043549	GO:BP	regulation of kinase activity	13422	12441	GO:0042325, GO:0051338
query_1	TRUE	1.99292e-05	983	25	12	0.48	0.0122075	GO:0006996	GO:BP	organelle organization	13422	2933	GO:0016043
query_1	TRUE	3.90414e-05	126	25	6	0.24	0.047619	GO:0001932	GO:BP	regulation of protein phosphorylation	13422	671	GO:0006468, GO:0031399, GO:0042325
query_1	TRUE	4.09274e-05	127	25	6	0.24	0.0472441	GO:0042325	GO:BP	regulation of phosphorylation	13422	11709	GO:0016310, GO:0019220
query_1	TRUE	7.18053e-05	500	26	8	0.307692	0.016	GO:0098772	GO:MF	molecular function regulator	17191	10451	GO:0003674
query_1	TRUE	0.000117626	253	25	7	0.28	0.027668	GO:0050790	GO:BP	regulation of catalytic activity	13422	15379	GO:0065009
query_1	TRUE	0.000141529	260	25	7	0.28	0.0269231	GO:0065009	GO:BP	regulation of molecular function	13422	18680	GO:0065007
query_1	TRUE	0.000155169	33	25	4	0.16	0.121212	GO:0044770	GO:BP	cell cycle phase transition	13422	13028	GO:0022402
query_1	TRUE	0.000155169	33	25	4	0.16	0.121212	GO:0044772	GO:BP	mitotic cell cycle phase transition	13422	13030	GO:0044770, GO:1903047
query_1	TRUE	0.000165162	266	25	7	0.28	0.0263158	GO:0032268	GO:BP	regulation of cellular protein metabolic process	13422	8672	GO:0031323, GO:0044267, GO:0051246
query_1	TRUE	0.000173418	162	25	6	0.24	0.037037	GO:0019220	GO:BP	regulation of phosphate metabolic process	13422	6498	GO:0006796, GO:0051174
query_1	TRUE	0.000173418	162	25	6	0.24	0.037037	GO:0051174	GO:BP	regulation of phosphorus metabolic process	13422	15700	GO:0006793, GO:0031323
query_1	TRUE	0.000211934	276	25	7	0.28	0.0253623	GO:0051246	GO:BP	regulation of protein metabolic process	13422	15758	GO:0019538, GO:0051171, GO:0060255, GO:0080090
query_1	TRUE	0.000310817	1533	25	13	0.52	0.0084801	GO:0016043	GO:BP	cellular component organization	13422	5666	GO:0071840
query_1	TRUE	0.000639626	477	25	8	0.32	0.0167715	GO:0048522	GO:BP	positive regulation of cellular process	13422	14898	GO:0009987, GO:0048518, GO:0050794
query_1	TRUE	0.000813057	173	26	5	0.192308	0.0289017	GO:0019899	GO:MF	enzyme binding	17191	4632	GO:0005515
query_1	TRUE	0.00102794	332	19	6	0.315789	0.0180723	GO:1990234	GO:CC	transferase complex	11057	4211	GO:1902494
query_1	TRUE	0.00126194	1731	25	13	0.52	0.00751011	GO:0071840	GO:BP	cellular component organization or biogenesis	13422	19833	GO:0009987
query_1	TRUE	0.0019531	554	25	8	0.32	0.0144404	GO:0048518	GO:BP	positive regulation of biological process	13422	14894	GO:0008150, GO:0050789
query_1	TRUE	0.00464374	130	19	4	0.210526	0.0307692	GO:0015630	GO:CC	microtubule cytoskeleton	11057	846	GO:0005856
query_1	TRUE	0.00586244	8	19	2	0.105263	0.25	GO:0009524	GO:CC	phragmoplast	11057	740	GO:0005737, GO:0110165
query_1	TRUE	0.013465	1212	25	10	0.4	0.00825083	GO:0006468	GO:BP	protein phosphorylation	13422	2459	GO:0006464, GO:0016310
query_1	TRUE	0.0185669	186	19	4	0.210526	0.0215054	GO:0005856	GO:CC	cytoskeleton	11057	499	GO:0043232
query_1	TRUE	0.0208967	6	25	2	0.08	0.333333	GO:0010311	GO:BP	lateral root formation	13422	4549	GO:0009791, GO:0010102, GO:1905393
query_1	TRUE	0.0353982	628	19	6	0.315789	0.00955414	GO:1902494	GO:CC	catalytic complex	11057	4005	GO:0032991
query_1	TRUE	0.0389181	8	25	2	0.08	0.25	GO:0010101	GO:BP	post-embryonic root morphogenesis	13422	4389	GO:0010015, GO:0048528, GO:0090697
query_1	TRUE	0.0389181	8	25	2	0.08	0.25	GO:0010102	GO:BP	lateral root morphogenesis	13422	4390	GO:0010101, GO:0048527
query_1	TRUE	0.0457807	99	19	3	0.157895	0.030303	GO:0005874	GO:CC	microtubule	11057	512	GO:0015630, GO:0099513
sldella_M3
query	significant	p_value	term_size	query_size	intersection_size	precision	recall	term_id	source	term_name	effective_domain_size	source_order	parents
query_1	TRUE	1.26043e-12	225	61	16	0.262295	0.0711111	GO:0015979	GO:BP	photosynthesis	13422	5642	GO:0044237
query_1	TRUE	2.096e-06	123	61	9	0.147541	0.0731707	GO:0019684	GO:BP	photosynthesis, light reaction	13422	6931	GO:0006091, GO:0015979
query_1	TRUE	0.00066924	391	61	11	0.180328	0.028133	GO:0006091	GO:BP	generation of precursor metabolites and energy	13422	2131	GO:0044237
query_1	TRUE	0.00387528	28	61	4	0.0655738	0.142857	GO:0009765	GO:BP	photosynthesis, light harvesting	13422	4127	GO:0006091, GO:0019684
query_1	TRUE	0.0101522	12	61	3	0.0491803	0.25	GO:0009773	GO:BP	photosynthetic electron transport in photosystem I	13422	4135	GO:0009767
query_1	TRUE	6.05074e-11	208	53	14	0.264151	0.0673077	GO:0042651	GO:CC	thylakoid membrane	11057	2081	GO:0034357
query_1	TRUE	2.30509e-10	183	53	13	0.245283	0.0710383	GO:0055035	GO:CC	plastid thylakoid membrane	11057	2576	GO:0031976, GO:0042651
query_1	TRUE	2.30509e-10	183	53	13	0.245283	0.0710383	GO:0009535	GO:CC	chloroplast thylakoid membrane	11057	751	GO:0009534, GO:0055035
query_1	TRUE	4.94041e-10	907	53	23	0.433962	0.0253583	GO:0009507	GO:CC	chloroplast	11057	724	GO:0009536
query_1	TRUE	7.05706e-10	249	53	14	0.264151	0.0562249	GO:0034357	GO:CC	photosynthetic membrane	11057	1707	GO:0009579, GO:0016020
query_1	TRUE	1.23183e-09	948	53	23	0.433962	0.0242616	GO:0009536	GO:CC	plastid	11057	752	GO:0005737, GO:0043231
query_1	TRUE	1.25395e-09	209	53	13	0.245283	0.062201	GO:0009534	GO:CC	chloroplast thylakoid	11057	750	GO:0009507, GO:0031976
query_1	TRUE	1.25395e-09	209	53	13	0.245283	0.062201	GO:0031976	GO:CC	plastid thylakoid	11057	1457	GO:0009536, GO:0009579, GO:0031984
query_1	TRUE	1.94364e-08	319	53	14	0.264151	0.0438871	GO:0009579	GO:CC	thylakoid	11057	777	GO:0005622
query_1	TRUE	2.08077e-06	64	53	7	0.132075	0.109375	GO:0009523	GO:CC	photosystem II	11057	739	GO:0009521
query_1	TRUE	5.21435e-06	111	53	8	0.150943	0.0720721	GO:0009521	GO:CC	photosystem	11057	737	GO:0034357, GO:0098796
query_1	TRUE	0.000311339	590	53	13	0.245283	0.0220339	GO:0031984	GO:CC	organelle subcompartment	11057	1464	GO:0043227, GO:0043229, GO:0110165
query_1	TRUE	0.00808858	4153	53	34	0.641509	0.00818685	GO:0005737	GO:CC	cytoplasm	11057	392	GO:0005622, GO:0110165
query_1	TRUE	0.00909749	49	53	4	0.0754717	0.0816327	GO:0009522	GO:CC	photosystem I	11057	738	GO:0009521
query_1	TRUE	0.0197428	176	53	6	0.113208	0.0340909	GO:0009526	GO:CC	plastid envelope	11057	742	GO:0009536, GO:0031967
query_1	TRUE	0.0352458	466	53	9	0.169811	0.0193133	GO:0098796	GO:CC	membrane protein complex	11057	3642	GO:0016020, GO:0032991
query_1	TRUE	2.3189e-05	33	27	6	0.222222	0.181818	KEGG:00195	KEGG	Photosynthesis	2496	20	KEGG:00000
query_1	TRUE	5.57292e-05	38	27	6	0.222222	0.157895	KEGG:00710	KEGG	Carbon fixation in photosynthetic organisms	2496	117	KEGG:00000
query_1	TRUE	0.00322866	149	27	8	0.296296	0.0536913	KEGG:01200	KEGG	Carbon metabolism	2496	183	KEGG:00000
sldella_M4
query	significant	p_value	term_size	query_size	intersection_size	precision	recall	term_id	source	term_name	effective_domain_size	source_order	parents
query_1	TRUE	0.000570738	57	7	3	0.428571	0.0526316	GO:0009620	GO:BP	response to fungus	13422	4004	GO:0051707
query_1	TRUE	0.0145073	167	7	3	0.428571	0.0179641	GO:0051707	GO:BP	response to other organism	13422	16113	GO:0043207, GO:0044419
query_1	TRUE	0.0145073	167	7	3	0.428571	0.0179641	GO:0043207	GO:BP	response to external biotic stimulus	13422	12240	GO:0009605, GO:0009607
query_1	TRUE	0.0169628	176	7	3	0.428571	0.0170455	GO:0044419	GO:BP	biological process involved in interspecies interaction between organisms	13422	12832	GO:0008150
query_1	TRUE	0.0203164	187	7	3	0.428571	0.0160428	GO:0009607	GO:BP	response to biotic stimulus	13422	3993	GO:0050896
sltap3_M1
query	significant	p_value	term_size	query_size	intersection_size	precision	recall	term_id	source	term_name	effective_domain_size	source_order	parents
query_1	TRUE	2.61259e-05	1807	102	30	0.294118	0.0166021	GO:0016491	GO:MF	oxidoreductase activity	17191	3569	GO:0003824
query_1	TRUE	0.0026003	8670	102	73	0.715686	0.00841984	GO:0003824	GO:MF	catalytic activity	17191	518	GO:0003674
query_1	TRUE	0.0110382	358	71	10	0.140845	0.027933	GO:0005576	GO:CC	extracellular region	11057	248	GO:0110165
query_1	TRUE	0.0254986	693	28	16	0.571429	0.023088	KEGG:01110	KEGG	Biosynthesis of secondary metabolites	2496	181	KEGG:00000
query_1	TRUE	0.0291512	1580	88	24	0.272727	0.0151899	GO:0055114	GO:BP	obsolete oxidation-reduction process	13422	16868
sltap3_M2
query	significant	p_value	term_size	query_size	intersection_size	precision	recall	term_id	source	term_name	effective_domain_size	source_order	parents
query_1	TRUE	4.46727e-06	47	48	6	0.125	0.12766	GO:1902911	GO:CC	protein kinase complex	11057	4042	GO:0061695
query_1	TRUE	3.60007e-05	35	48	5	0.104167	0.142857	GO:0000307	GO:CC	cyclin-dependent protein kinase holoenzyme complex	11057	59	GO:1902554
query_1	TRUE	8.23439e-05	34	50	5	0.1	0.147059	GO:0008284	GO:BP	positive regulation of cell population proliferation	13422	3582	GO:0008283, GO:0042127, GO:0048522
query_1	TRUE	0.00011094	36	50	5	0.1	0.138889	GO:0042127	GO:BP	regulation of cell population proliferation	13422	11590	GO:0008283, GO:0050794
query_1	TRUE	0.000116968	44	48	5	0.104167	0.113636	GO:1902554	GO:CC	serine/threonine protein kinase complex	11057	4016	GO:1902911
query_1	TRUE	0.000431255	54	65	5	0.0769231	0.0925926	GO:0019887	GO:MF	protein kinase regulator activity	17191	4627	GO:0019207
query_1	TRUE	0.000566013	57	65	5	0.0769231	0.0877193	GO:0019207	GO:MF	kinase regulator activity	17191	4541	GO:0030234
query_1	TRUE	0.000617612	58	65	5	0.0769231	0.0862069	GO:0019901	GO:MF	protein kinase binding	17191	4634	GO:0019900
query_1	TRUE	0.000731343	52	50	5	0.1	0.0961538	GO:0008283	GO:BP	cell population proliferation	13422	3581	GO:0009987
query_1	TRUE	0.000794906	61	65	5	0.0769231	0.0819672	GO:0019900	GO:MF	kinase binding	17191	4633	GO:0019899
query_1	TRUE	0.00206376	132	48	6	0.125	0.0454545	GO:0061695	GO:CC	transferase complex, transferring phosphorus-containing groups	11057	2653	GO:1990234
query_1	TRUE	0.00258758	118	50	6	0.12	0.0508475	GO:0051338	GO:BP	regulation of transferase activity	13422	15835	GO:0050790
query_1	TRUE	0.00301569	69	50	5	0.1	0.0724638	GO:0007346	GO:BP	regulation of mitotic cell cycle	13422	3239	GO:0000278, GO:0051726
query_1	TRUE	0.00445253	42	65	4	0.0615385	0.0952381	GO:0016538	GO:MF	cyclin-dependent protein serine/threonine kinase regulator activity	17191	3601	GO:0019887
query_1	TRUE	0.00776594	302	50	8	0.16	0.0264901	GO:0007049	GO:BP	cell cycle	13422	2976	GO:0009987
query_1	TRUE	0.0094412	42	50	4	0.08	0.0952381	GO:0000079	GO:BP	regulation of cyclin-dependent protein serine/threonine kinase activity	13422	39	GO:0071900, GO:1904029
query_1	TRUE	0.0094412	42	50	4	0.08	0.0952381	GO:1904029	GO:BP	regulation of cyclin-dependent protein kinase activity	13422	27028	GO:0045859, GO:0051726
query_1	TRUE	0.0111209	90	50	5	0.1	0.0555556	GO:0010564	GO:BP	regulation of cell cycle process	13422	4729	GO:0022402, GO:0051726
query_1	TRUE	0.0124647	45	50	4	0.08	0.0888889	GO:0045787	GO:BP	positive regulation of cell cycle	13422	13564	GO:0007049, GO:0048522, GO:0051726
query_1	TRUE	0.016145	48	50	4	0.08	0.0833333	GO:0007088	GO:BP	regulation of mitotic nuclear division	13422	3012	GO:0007346, GO:0010564, GO:0051783, GO:0140014
query_1	TRUE	0.0190044	50	50	4	0.08	0.08	GO:0071900	GO:BP	regulation of protein serine/threonine kinase activity	13422	19875	GO:0045859
query_1	TRUE	0.0222182	52	50	4	0.08	0.0769231	GO:0051783	GO:BP	regulation of nuclear division	13422	16147	GO:0000280, GO:0033043
query_1	TRUE	0.0256524	107	50	5	0.1	0.046729	GO:0045859	GO:BP	regulation of protein kinase activity	13422	13626	GO:0001932, GO:0043549
query_1	TRUE	0.0268226	108	50	5	0.1	0.0462963	GO:0043549	GO:BP	regulation of kinase activity	13422	12441	GO:0042325, GO:0051338
query_1	TRUE	0.0269053	178	50	6	0.12	0.0337079	GO:0000278	GO:BP	mitotic cell cycle	13422	118	GO:0007049
query_1	TRUE	0.0269053	178	50	6	0.12	0.0337079	GO:0031399	GO:BP	regulation of protein modification process	13422	8327	GO:0006464, GO:0032268
sltap3_M3
query	significant	p_value	term_size	query_size	intersection_size	precision	recall	term_id	source	term_name	effective_domain_size	source_order	parents
query_1	TRUE	7.66601e-13	225	40	14	0.35	0.0622222	GO:0015979	GO:BP	photosynthesis	13422	5642	GO:0044237
query_1	TRUE	1.01971e-09	123	40	10	0.25	0.0813008	GO:0019684	GO:BP	photosynthesis, light reaction	13422	6931	GO:0006091, GO:0015979
query_1	TRUE	2.2891e-09	208	35	11	0.314286	0.0528846	GO:0042651	GO:CC	thylakoid membrane	11057	2081	GO:0034357
query_1	TRUE	1.57193e-08	183	35	10	0.285714	0.0546448	GO:0055035	GO:CC	plastid thylakoid membrane	11057	2576	GO:0031976, GO:0042651
query_1	TRUE	1.57193e-08	183	35	10	0.285714	0.0546448	GO:0009535	GO:CC	chloroplast thylakoid membrane	11057	751	GO:0009534, GO:0055035
query_1	TRUE	1.59454e-08	249	35	11	0.314286	0.0441767	GO:0034357	GO:CC	photosynthetic membrane	11057	1707	GO:0009579, GO:0016020
query_1	TRUE	3.3348e-08	907	35	17	0.485714	0.0187431	GO:0009507	GO:CC	chloroplast	11057	724	GO:0009536
query_1	TRUE	5.80204e-08	209	35	10	0.285714	0.0478469	GO:0009534	GO:CC	chloroplast thylakoid	11057	750	GO:0009507, GO:0031976
query_1	TRUE	5.80204e-08	209	35	10	0.285714	0.0478469	GO:0031976	GO:CC	plastid thylakoid	11057	1457	GO:0009536, GO:0009579, GO:0031984
query_1	TRUE	6.64865e-08	948	35	17	0.485714	0.0179325	GO:0009536	GO:CC	plastid	11057	752	GO:0005737, GO:0043231
query_1	TRUE	8.94477e-08	28	40	6	0.15	0.214286	GO:0009765	GO:BP	photosynthesis, light harvesting	13422	4127	GO:0006091, GO:0019684
query_1	TRUE	2.21802e-07	319	35	11	0.314286	0.0344828	GO:0009579	GO:CC	thylakoid	11057	777	GO:0005622
query_1	TRUE	4.28158e-06	64	35	6	0.171429	0.09375	GO:0009523	GO:CC	photosystem II	11057	739	GO:0009521
query_1	TRUE	4.60246e-06	111	35	7	0.2	0.0630631	GO:0009521	GO:CC	photosystem	11057	737	GO:0034357, GO:0098796
query_1	TRUE	6.34486e-06	391	40	11	0.275	0.028133	GO:0006091	GO:BP	generation of precursor metabolites and energy	13422	2131	GO:0044237
query_1	TRUE	4.13831e-05	49	35	5	0.142857	0.102041	GO:0009522	GO:CC	photosystem I	11057	738	GO:0009521
query_1	TRUE	0.000135242	33	21	5	0.238095	0.151515	KEGG:00195	KEGG	Photosynthesis	2496	20	KEGG:00000
query_1	TRUE	0.000315983	42	36	4	0.111111	0.0952381	GO:0016168	GO:MF	chlorophyll binding	17191	3451	GO:0046906
query_1	TRUE	0.000961153	590	35	10	0.285714	0.0169492	GO:0031984	GO:CC	organelle subcompartment	11057	1464	GO:0043227, GO:0043229, GO:0110165
query_1	TRUE	0.00364349	13	21	3	0.142857	0.230769	KEGG:00196	KEGG	Photosynthesis - antenna proteins	2496	21	KEGG:00000
query_1	TRUE	0.00500754	23	35	3	0.0857143	0.130435	GO:0010287	GO:CC	plastoglobule	11057	811	GO:0009570, GO:0110165
query_1	TRUE	0.00572832	15	40	3	0.075	0.2	GO:0009768	GO:BP	photosynthesis, light harvesting in photosystem I	13422	4130	GO:0009765
query_1	TRUE	0.00630008	48	40	4	0.1	0.0833333	GO:0018298	GO:BP	protein-chromophore linkage	13422	6194	GO:0006464
query_1	TRUE	0.00820058	466	35	8	0.228571	0.0171674	GO:0098796	GO:CC	membrane protein complex	11057	3642	GO:0016020, GO:0032991
query_1	TRUE	0.0105869	44	21	4	0.190476	0.0909091	KEGG:00630	KEGG	Glyoxylate and dicarboxylate metabolism	2496	108	KEGG:00000
query_1	TRUE	0.0280599	9	36	2	0.0555556	0.222222	GO:0016984	GO:MF	ribulose-bisphosphate carboxylase activity	17191	3921	GO:0016831
sltap3_M4
query	significant	p_value	term_size	query_size	intersection_size	precision	recall	term_id	source	term_name	effective_domain_size	source_order	parents
query_1	TRUE	0.00023947	2	12	2	0.166667	1	GO:0075259	GO:BP	spore-bearing structure development	13422	20807	GO:0048608
query_1	TRUE	0.00023947	2	12	2	0.166667	1	GO:0030582	GO:BP	reproductive fruiting body development	13422	7937	GO:0075259
query_1	TRUE	0.00023947	2	12	2	0.166667	1	GO:0031155	GO:BP	regulation of reproductive fruiting body development	13422	8228	GO:0030582, GO:0075260
query_1	TRUE	0.00023947	2	12	2	0.166667	1	GO:0075260	GO:BP	regulation of spore-bearing organ development	13422	20808	GO:0050793, GO:0075259, GO:2000241
query_1	TRUE	0.00105127	34	12	3	0.25	0.0882353	GO:0007568	GO:BP	aging	13422	3445	GO:0032502
query_1	TRUE	0.00173525	63	14	3	0.214286	0.047619	GO:0030414	GO:MF	peptidase inhibitor activity	17191	4874	GO:0004857, GO:0061134
query_1	TRUE	0.00173525	63	14	3	0.214286	0.047619	GO:0004866	GO:MF	endopeptidase inhibitor activity	17191	1432	GO:0030414, GO:0061135
query_1	TRUE	0.00181972	64	14	3	0.214286	0.046875	GO:0061135	GO:MF	endopeptidase regulator activity	17191	9633	GO:0061134
query_1	TRUE	0.00190685	65	14	3	0.214286	0.0461538	GO:0061134	GO:MF	peptidase regulator activity	17191	9632	GO:0030234
query_1	TRUE	0.0363487	18	12	2	0.166667	0.111111	GO:0090693	GO:BP	plant organ senescence	13422	21667	GO:0007568, GO:0099402
query_1	TRUE	0.0363487	18	12	2	0.166667	0.111111	GO:0010150	GO:BP	leaf senescence	13422	4437	GO:0048366, GO:0090693
query_1	TRUE	0.0484216	193	14	3	0.214286	0.015544	GO:0004857	GO:MF	enzyme inhibitor activity	17191	1424	GO:0030234
sltap3_M5
query	significant	p_value	term_size	query_size	intersection_size	precision	recall	term_id	source	term_name	effective_domain_size	source_order	parents
query_1	TRUE	0.00647878	177	13	4	0.307692	0.0225989	GO:0009416	GO:BP	response to light stimulus	13422	3935	GO:0009314
query_1	TRUE	0.00707465	181	13	4	0.307692	0.0220994	GO:0009314	GO:BP	response to radiation	13422	3908	GO:0009628
Severianin_vs_M82_M1
query	significant	p_value	term_size	query_size	intersection_size	precision	recall	term_id	source	term_name	effective_domain_size	source_order	parents
query_1	TRUE	0.000422663	218	15	5	0.333333	0.0229358	GO:0005618	GO:CC	cell wall	11096	281	GO:0030312
query_1	TRUE	0.00046187	222	15	5	0.333333	0.0225225	GO:0030312	GO:CC	external encapsulating structure	11096	1094	GO:0071944, GO:0110165
query_1	TRUE	0.000492597	51	4	3	0.75	0.0588235	KEGG:00040	KEGG	Pentose and glucuronate interconversions	2501	5	KEGG:00000
query_1	TRUE	0.0081493	195	20	4	0.2	0.0205128	GO:0004857	GO:MF	enzyme inhibitor activity	17255	1414	GO:0003674
query_1	TRUE	0.0136324	82	20	3	0.15	0.0365854	GO:0030599	GO:MF	pectinesterase activity	17255	4909	GO:0052689
query_1	TRUE	0.0480369	86	16	3	0.1875	0.0348837	GO:0042545	GO:BP	cell wall modification	13501	11853	GO:0071555
Severianin_vs_M82_M2
query	significant	p_value	term_size	query_size	intersection_size	precision	recall	term_id	source	term_name	effective_domain_size	source_order	parents
query_1	TRUE	0.036589	46	9	2	0.222222	0.0434783	GO:0000325	GO:CC	plant-type vacuole	11096	69	GO:0005773

## Sheet: Dataset S4
Dataset S4. Weighted correlation network analysis (WCNA) of the five major modules for the matabolome dataset.
Metabolite modules were determined by the fast-greedy modularity optimization algorithm.
MTJ_vs_sliaa9																		MTB_vs_sldella																		MTJ_vs_sltap3
Row.names	degree	strength	between	page.rank	module	iaa9_m2	iaa9_0	iaa9_2P	iaa9_4P	iaa9_2E	iaa9_4E	MTJ_m2	MTJ_0	MTJ_2P	MTJ_4P	MTJ_2E	MTJ_4E	Row.names	degree	strength	between	page.rank	module	della_m2	della_0	della_2P	della_4P	della_2E	della_4E	MTB_m2	MTB_0	MTB_2P	MTB_4P	MTB_2E	MTB_4E	Row.names	degree	strength	between	page.rank	module	tap3_m2	tap3_0	tap3_2	tap3_4	tap3_8	MTJ_m2	MTJ_0	MTJ_2P
ABA	0	0	0	0.000309119	164	-0.160279	-0.0704342	0.590703	2.29996	0.108188	0.598365	-1.11262	-0.623779	-1.36526	0.87818	-0.722228	-0.420803	GA8	0	0	0	0.000306435	155	1.0831	-0.716139	-0.99331	-0.558515	-1.42336	-0.322898	1.28531	0.437904	0.778142	1.6086	-0.312404	-0.866438	iPRPs	0	0	0	0.000276651	88	0.294243	-0.659683	-0.896627	-0.698615	-0.898107	1.16221	1.57071	0.310948
Asparagine..DL...3TMS.	0	0	0	0.000309119	142	-1.54675	-1.58805	-0.796994	-0.291372	-0.227436	-0.0385524	1.70435	0.698992	0.0477097	0.929363	0.0862352	1.0225	LesAffx.67531.1.S1_at; Solyc09g083290.3; Auxin-responsive protein [Source:UniProtKB/TrEMBL;Acc:G9HPW2]	0	0	0	0.000306435	133	-1.09751	0.873721	0.961949	0.508847	0.895441	-0.46068	-1.24204	-0.798728	1.22892	-1.49697	0.907407	-0.280362	GC_228_Quinic.acid..3.caffeoyl...cis...6TMS.	0	0	0	0.000276651	80	0.254261	-0.611423	1.61639	-0.0708667	0.437927	-0.504397	-1.45693	-1.035
C00000615.Caffeic.acid.	0	0	0	0.000309119	133	0.000709211	0.299193	0.109004	-0.145824	-1.95126	-1.48392	0.271978	1.0492	1.20773	1.30091	0.0747718	-0.732499	LesAffx.49935.1.S1_at; Solyc10g076510.2; nan	0	0	0	0.000306435	124	-0.290274	0.487281	0.597484	1.42553	1.3707	-0.279473	-0.487352	-1.07855	-0.296384	-2.01224	0.845491	-0.282208	GC_173_Octadecadienoic.acid..9.12..Z.Z....n...1TMS.	1	0.114	0	0.00184434	5	-0.512206	0.497802	0.67275	-0.0780399	2.61581	-0.924707	-1.22351	0.610476
C00000856.4.Hydroxybenzoic.acid.C00000206.Salicylic.acid.	0	0	0	0.000309119	129	-0.798205	0.282786	0.467516	0.624168	1.1094	-1.00178	-1.62944	-0.45068	1.13961	-0.388955	1.53189	-0.886311	LesAffx.3467.1.S1_at; Solyc04g072920.3; Trehalose 6-phosphate phosphatase [Source:UniProtKB/TrEMBL;Acc:K4BTS9]	0	0	0	0.000306435	120	0.695277	-0.298226	-0.533007	-0.744313	-1.13665	1.36719	1.31038	0.164059	-0.872958	-0.417553	-1.11608	1.58188	GC_164_Sinapic.acid..trans...2TMS.	6	1.49828	0	0.00133264	1	-0.150158	-0.332254	-0.188625	-0.287368	-0.497065	-0.162895	3.30712	-0.470025
C00001378.L.Lysine.	2	0.518848	0	0.00149037	17	-1.14121	-0.891866	-0.771027	-0.956245	-0.636422	-0.920564	0.311798	0.826845	1.32278	1.15884	1.49169	0.205377	LesAffx.11941.1.S1_at; Solyc02g077040.3; nan	1	0.16283	0	0.00100798	15	2.04929	-0.58771	-0.210678	-0.656864	-0.764033	0.464706	1.91102	-0.662101	-0.0124867	-0.0692059	-0.818864	-0.643083	LesAffx.57454.1.S1_at; Solyc01g010020.3; Probable calcium-binding protein CML16 [Source:Projected from Arabidopsis thaliana (AT3G25600) UniProtKB/Swiss-Prot;Acc:Q9LI84]	61	11.5299	0.000307089	0.00180762	3	0.961193	1.31167	0.200289	1.35825	-0.737521	1.01419	-0.993016	0.191705
C00001435.Tyramine.	0	0	0	0.000309119	135	0.0798634	-0.0744768	-1.23527	-1.10838	-1.06125	-0.745376	1.13862	1.46103	1.10963	1.11652	-0.793824	0.112928	LesAffx.60831.1.S1_at; Solyc09g072700.3; nan	0	0	0	0.000306435	126	0.282015	-0.475955	-0.576289	-2.01305	-1.22375	0.530627	1.0901	1.02278	0.0119633	1.18547	-0.579014	0.745096	GC_175_Tryptamine..3TMS.	5	0.806108	0	0.00081205	4	-0.671562	0.136567	-0.55643	0.827164	-0.3093	3.00332	-0.339556	-0.632226
C00002683.Vanillin.C00030767.Methyl.salicylate.	0	0	0	0.000309119	130	-0.0655136	-0.926925	-1.00386	-0.998462	-0.963976	0.530071	0.873134	1.40165	-0.350183	1.01306	-0.963874	1.45489	LesAffx.44452.1.S1_at; Solyc03g118540.3; nan	0	0	0	0.000306435	121	-1.26252	1.09583	0.70146	0.615781	0.489691	-0.397805	-1.39738	-1.22719	1.24566	-0.880786	1.07095	-0.053701	GC_166.X_160_Inositol..myo...6TMS.	0	0	0	0.000276651	77	-1.24328	-1.1461	0.99927	-0.605723	0.151736	-0.194574	1.38267	0.937201
C00006868.Peonidin.3..6..3.glucosylcaffeyl.glucoside..5.glucoside.C00007656.Cyanidin.3.O..2...O..2....O..sinapoyl..xylosyl..glucoside..5.O.glucoside.	2	0.852909	0	0.00237561	27	0.465667	0.144066	-0.49336	-0.733389	-2.13443	0.459566	0.791848	0.986675	0.489392	1.26429	-1.32955	0.08923	Les.2747.2.S1_at; Solyc09g061840.3; nan	5	1.77456	0	0.00269241	23	1.57417	-0.926397	-0.576287	-1.26267	-0.872938	0.926847	1.53119	-0.0776021	-0.397449	-0.148414	-0.768227	0.997774	LesAffx.64585.1.S1_at; Solyc03g006250.3; nan	0	0	0	0.000276651	51	-0.401308	0.738892	0.92431	0.484495	-1.11008	0.859116	0.561389	1.34159
C00006900.Petanin.	2	0.839581	0	0.00234043	27	0.433741	0.209382	-0.357033	-0.638374	-2.20445	0.266038	0.850147	1.02922	0.37829	1.17609	-1.39038	0.247331	Les.2747.1.S1_at; Solyc09g061840.3; nan	5	1.71918	0	0.00262141	23	1.60156	-0.859127	-0.472129	-1.36556	-0.837381	0.961477	1.48398	-0.0497468	-0.455294	-0.0697073	-0.853585	0.915516	LesAffx.64505.2.S1_at; Solyc07g066330.3; nan	19	3.17812	0.00214404	0.00141275	4	-0.202216	0.394855	-0.648445	1.58361	-0.752988	2.43337	-0.84156	-0.79856
C00007397.3.Indolylmethylthiohydroximate.	2	0.488598	5.58344e-06	0.00146634	27	0.816433	0.212168	-0.473057	-0.992972	-1.95072	0.723107	0.585622	0.97637	0.0694196	1.05465	-1.46336	0.442347	Les.2544.1.A1_at; Solyc10g079950.2; nan	2	0.487993	5.58344e-06	0.0014969	22	1.67572	-0.651497	-0.595159	-0.851351	-1.13308	0.695581	1.92216	-0.1151	-0.233178	-0.0633134	-1.01195	0.361162	LesAffx.64357.1.S1_at; Solyc03g007770.3; nan	162	25.9416	0.00651588	0.00358204	1	1.40804	1.14228	-0.979935	1.18775	-1.23286	1.11043	-1.16703	0.31118
C00007403.Pyroglutamic.acid.	0	0	0	0.000309119	132	0.795037	0.807579	0.817229	0.825077	-0.604737	-1.14588	0.0612874	0.186603	0.418854	0.12998	0.238875	-2.5299	LesAffx.4793.1.S1_at; Solyc01g095630.3; WRKY transcription factor [Source:UniProtKB/TrEMBL;Acc:D3YEX5]	0	0	0	0.000306435	123	1.23316	-0.531111	-0.310714	-0.491147	-1.07564	0.658682	1.64648	0.388453	-0.290305	0.719021	-1.95078	0.00390472	GC_169_Phytol..1TMS.	0	0	0	0.000276651	78	-0.203488	1.82984	2.42144	-0.3444	-0.760215	-0.688669	-0.827695	-0.318247
C00007420.alpha.Ketopantoate.	1	0.101349	0	0.000404903	3	0.341182	0.408956	-0.116758	-0.300204	-1.29968	-1.19117	0.858391	1.34117	0.942985	1.25386	-1.09079	-1.14794	LesAffx.15986.1.S1_at; Solyc12g008640.2; nan	4	0.425814	5.58344e-06	0.000549265	3	-0.99692	0.790156	0.112443	0.727776	1.54514	-0.676676	-1.06332	-0.966294	0.239675	-0.977278	1.66143	-0.396129	LesAffx.16672.1.S1_at; Solyc01g098390.3; nan	136	23.2829	0.00553319	0.00318995	1	0.943854	0.940642	-0.695064	1.1722	-1.66155	1.48438	-1.35437	0.08423
C00007444.Adenosine.	0	0	0	0.000309119	134	-1.28514	-0.880401	-1.2909	-0.163152	-0.886826	-0.177466	0.783631	0.853296	-0.404083	0.593759	1.18143	1.67586	LesAffx.54411.1.S1_at; Solyc04g008940.3; nan	0	0	0	0.000306435	125	-0.80574	0.0724023	0.0788494	0.450843	1.28221	1.11467	-0.894069	-1.22987	-0.208943	-1.74464	0.748645	1.13565	GC_174_Tryptophan..DL...3TMS.	3	0.540359	0	0.000654111	4	-0.530201	-0.358977	-0.525794	0.483503	-0.36296	3.20037	0.0397266	-0.512893
C00007539.3.Ketosphinganine.	1	0.213438	0	0.00206079	14	0.292924	-0.00233863	1.17421	0.727169	0.374358	-0.95719	-1.11431	-1.00053	1.34303	-1.16886	1.2799	-0.948358	Les.5842.1.S1_at; Solyc09g059170.2; nan	1	0.11994	0	0.0020429	9	-0.654704	0.170942	-0.312669	1.3091	0.656911	1.15054	-0.98268	-0.844699	-0.981515	-1.50483	0.795448	1.19815	LesAffx.51158.2.S1_at; Solyc02g085630.3; nan	5	1.12343	0.00552202	0.00200532	4	-0.650926	0.264889	-0.374129	1.14533	-1.0233	1.92399	-1.89928	-0.802564
C00007543.4.Hydroxysphinganine.	1	0.213438	0	0.00206079	14	0.534933	0.362176	1.08846	0.832032	0.462113	-0.781489	-0.829783	-1.10945	1.06298	-1.42555	1.08089	-1.27731	TAG_50.1...M.NH4...	1	0.125661	0	0.0020429	10	0.151009	0.814392	0.983393	0.793261	0.686017	-0.0971105	-0.598592	-1.41393	0.98939	-2.14877	0.288798	-0.447857	LesAffx.51271.1.S1_at; Solyc04g077780.3; nan	23	4.00738	0	0.000828914	3	-1.68278	-1.62472	-1.01875	-0.830995	0.399769	0.35017	1.14146	-0.179978
C00007596..LL.2.6.Diaminoheptanedioate..C00007595..meso.2.6.Diaminoheptanedioate..	0	0	0	0.000309119	131	0.206775	1.6483	-0.0628751	0.750254	-2.04119	-0.66255	-0.445251	0.537807	0.855916	0.782268	-0.832062	-0.737392	LesAffx.4662.1.S1_at; Solyc05g005680.3; Xyloglucan endotransglucosylase/hydrolase [Source:UniProtKB/TrEMBL;Acc:K4BW96]	0	0	0	0.000306435	122	-1.24962	1.52177	0.58943	0.473964	0.815883	-1.00558	-1.36934	-0.471865	0.905417	-0.856682	1.03509	-0.388482	GC_168.X_156_Caffeic.acid..trans...3TMS.	18	2.05811	0.000223338	0.000510768	1	-1.1747	-0.680815	0.387261	-0.894329	2.5875	-0.844626	0.3997	-0.915821
C00007667.5.Methylsufinylpentyl.nitrile.	0	0	0	0.000309119	136	-1.42633	-0.950343	-0.422935	-0.220063	0.83731	-0.260171	-0.373987	0.470923	-1.03169	2.22359	0.700249	0.453457	LesAffx.62577.1.S1_at; Solyc07g065930.3; nan	0	0	0	0.000306435	127	1.04527	-1.13888	-1.10254	-0.658935	-0.793274	1.18739	1.48156	0.464854	-1.23156	0.485021	-0.471217	0.732301	GC_176_Spermidine..5TMS.	3	0.40018	0	0.000708192	4	-0.632729	-0.173403	1.60151	-0.881557	2.041	-1.11758	1.2393	-0.0214171
C00040805.25.Hydroxyvitamin.D3.	1	0.142484	0	0.000398304	2	1.02536	-0.742355	-1.02012	-1.00949	-0.941595	1.23837	0.934345	0.928633	-0.919835	0.275968	-0.941394	1.1721	Les.1821.1.A1_at; Solyc03g117560.3; nan	37	8.99995	0.00109994	0.00178505	2	-0.432431	0.907779	0.798904	0.467698	0.806883	-0.323431	-1.36583	-0.856371	1.03735	-1.8826	1.05451	-0.212462	Les.415.1.A1_at; Solyc08g005680.3; Dimethylallylcistransferase, chloroplastic [Source:UniProtKB/Swiss-Prot;Acc:C1K5M2]	0	0	0	0.000276651	40	-2.1185	-0.514279	0.335	0.387999	1.40128	0.757431	0.55729	-0.38043
Cysteine	0	0	0	0.000309119	153	-0.326782	-0.201576	1.05899	0.686117	0.996292	-1.0871	-0.683793	-1.0079	0.969381	-1.18127	1.60642	-0.828774	Shikimic.acid..4TMS.	0	0	0	0.000306435	144	-0.743926	0.685591	0.733454	0.121606	0.576736	-0.0463423	-1.45829	-1.50406	1.201	-1.21989	1.27516	0.378967	GC_292_Leucine	15	2.16889	0.00514793	0.00180212	1	-0.78578	-0.652545	-0.155029	-0.229643	1.79041	0.150161	2.38592	-0.663296
cZ	4	0.618468	1.67503e-05	0.00161402	7	-0.586695	0.0844993	0.612293	1.86264	0.228963	0.914772	-1.32378	-0.806524	-0.747792	1.26194	-1.09295	-0.407372	Les.1724.2.S1_at; Solyc10g084410.2; nan	4	1.44796	0	0.00207691	8	1.46859	-0.669639	-0.837593	-0.232729	-0.994526	0.649031	1.81185	0.457879	-1.07281	0.345433	-1.18309	0.257606	LesAffx.40089.1.S1_at; Solyc02g055440.3; nan	4	0.885979	0	0.000534145	3	-0.901539	-0.351458	-0.768446	-0.647668	0.271929	-2.41017	0.877697	0.802317
cZRPs	3	0.4479	5.58344e-06	0.00124606	7	-0.62446	-0.230957	0.607521	1.86193	0.338409	1.22132	-1.00852	-0.786061	-1.05717	1.13692	-0.78091	-0.678006	Les.1724.3.A1_at; Solyc10g084410.2; nan	3	1.16762	0	0.00168435	8	1.37891	-0.629779	-0.799625	-0.25382	-1.09165	0.8105	1.61505	0.549567	-1.0496	0.381779	-1.34349	0.432153	LesAffx.41988.1.S1_at; Solyc06g053760.3; SYP111 [Source:Projected from Arabidopsis thaliana (AT1G08560) UniProtKB/TrEMBL;Acc:A0A178WAC8]	74	22.2621	7.81682e-05	0.00303327	2	-1.28331	-0.725775	1.79135	-1.14723	1.52475	-1.28555	-0.565914	-0.0707702
Dihydrouracil_2TMS	0	0	0	0.000309119	137	-0.57188	-1.67638	-0.59956	1.06865	-1.68876	-0.167855	0.186467	0.620307	1.40324	0.611982	0.846704	-0.0329173	LesAffx.64054.3.S1_at; Solyc05g006730.3; nan	0	0	0	0.000306435	128	-1.01378	-0.282936	-0.0125738	1.75481	1.71846	-0.117927	-0.834409	-0.862124	-0.854687	-0.771874	1.00217	0.274875	GC_178_Fructose.6.phosphate..1MEOX...6TMS.	4	0.708288	0.00280847	0.000933434	16	-0.481981	0.569625	1.75886	-1.13559	1.45812	-1.48711	-0.442886	0.744164
DZR	0	0	0	0.000309119	161	-0.408636	0.0393894	0.449402	1.37414	0.905318	1.84267	-1.1576	-0.449888	-0.667246	0.236411	-0.816189	-1.34777	tZRPs	0	0	0	0.000306435	152	-0.847898	1.31273	-0.034341	-0.355307	0.477419	-0.116315	-1.57204	1.14528	0.308581	0.492248	0.962312	-1.77267	lc_pos_1809_C00002268.Tomatine.Toma02.alpha.Tomatine.isomer.Toma01.alpha.Tomatine.	3	0.897276	0	0.00247814	15	-1.05925	-1.1529	0.157635	-0.295739	0.217804	0.168185	-1.73291	-1.01819
DZRPs	1	0.297325	0	0.00206079	20	-1.33696	0.204169	0.288875	1.54864	0.240247	0.774193	-1.64904	-0.483169	0.304179	1.38972	-0.297577	-0.983277	Les.1192.2.S1_at; Solyc02g089075.1; nan	6	1.11815	0.00675038	0.00151485	19	-0.715137	0.231883	0.326216	1.10629	1.20633	0.578689	-1.52847	-1.26182	-0.185841	-1.39352	1.00783	0.627549	LesAffx.59842.1.S1_at; Solyc07g056160.3; nan	3	0.341471	0.00461751	0.000750235	9	0.157777	-0.331739	1.20668	-1.01824	0.0778224	-1.28873	-0.391952	1.923
GA19	2	0.39013	5.58344e-06	0.00300764	8	0.163789	0.280276	0.530745	1.42223	0.346835	1.01704	-0.422577	-1.22976	-0.259994	1.11955	-1.38724	-1.58089	Les.3972.1.S1_at; Solyc06g005560.3; nan	3	0.377189	0.00017867	0.000775136	8	-0.990465	0.684906	0.555686	1.33482	1.17246	-0.365009	-1.79218	-1.20365	0.362075	-0.159744	0.926401	-0.525311	LesAffx.4617.1.A1_at; Solyc08g079090.3; nan	174	35.883	0.00953652	0.00464349	1	-1.18899	-0.209565	0.9212	-1.08699	1.29284	-2.03341	1.05849	-0.497107
GA24	1	0.135507	0	0.00119708	8	0.215749	0.437165	0.0536725	1.35502	0.502178	0.927419	-0.409148	-1.7089	-0.424916	1.34591	-0.923765	-1.37039	Les.417.1.S1_at; Solyc04g078195.1; nan	4	0.575068	0.00120044	0.000790966	8	-0.94656	0.84381	0.871315	1.19634	1.12987	-0.579168	-1.5597	-1.16876	0.413485	-0.596664	0.967909	-0.57188	LesAffx.46503.1.S1_at; Solyc11g069250.2; nan	65	10.2192	0.00147403	0.00145813	2	-0.865042	-0.938289	1.40961	-1.09448	2.03931	-1.15895	-0.39517	-0.0576357
GA53	0	0	0	0.000309119	163	0.52956	0.2327	0.412744	0.791361	0.568173	1.0564	0.00195157	-1.96864	0.157638	0.878971	-1.00109	-1.65977	iP9G	0	0	0	0.000306435	154	-1.26966	0.611833	-0.00459469	-1.1086	0.213853	-1.13557	-0.42277	0.593884	0.120895	-0.828302	1.57024	1.65879	tZR	0	0	0	0.000276651	87	-0.912321	0.0650864	-0.00391076	-0.230006	-1.11381	-0.014393	2.07919	-0.841684
GA8	1	0.254624	0	0.00197765	8	-0.119995	0.213192	0.868538	1.77336	0.0757174	0.823608	-0.515981	-1.13551	-0.481564	1.08589	-1.14647	-1.44078	Les.2765.3.S1_at; Solyc03g113215.1; nan	10	1.903	0.0016862	0.00184129	8	1.3597	-0.874064	-0.764762	-1.02189	-1.03516	0.401477	1.50056	0.371238	-0.625478	1.28798	-0.972859	0.37326	LesAffx.44937.1.S1_at; Solyc05g051010.3; nan	35	4.55935	0.00936902	0.00138001	3	-1.5641	-0.237626	-0.249859	-0.304798	0.465364	-1.06539	1.32549	-1.2319
Galactinol..9TMS.	2	0.262891	0.00216638	0.00103809	9	0.866123	-0.129446	-1.01589	-1.38278	-1.12255	0.936097	1.03213	1.00138	0.0246711	0.310011	-1.45417	0.934429	Les.4291.1.S1_at; nan; nan	5	0.848629	0.000725847	0.00130036	8	-1.09475	0.561857	0.591177	1.38856	1.18749	-0.137592	-1.78052	-0.727546	0.194627	-0.82733	1.08026	-0.436227	LesAffx.46550.1.S1_at; Solyc01g089850.3; nan	108	18.3845	0.00238413	0.00255416	1	-1.02198	-0.220267	1.32505	-0.630626	1.55715	-1.47851	0.595523	-1.13639
Galacturonic.acid..D...1MEOX...5TMS.	0	0	0	0.000309119	146	0.254935	-0.919219	0.710232	-0.0239114	0.880938	1.53124	0.0778168	-0.522509	-0.38529	-2.31652	-0.100392	0.812672	C00007420.alpha.Ketopantoate.	0	0	0	0.000306435	137	0.677189	0.343698	0.454675	-1.03916	-0.787649	-1.38403	1.03236	1.17841	0.852085	0.909744	-0.906659	-1.33066	GC_280_Pyroglutamate	15	2.33084	0.00666663	0.00124204	1	-0.770556	-0.434725	0.136587	-0.830274	1.95128	-1.04741	1.93559	-0.0218908
Glucose1	1	0.301037	0	0.00206079	21	-0.26496	-0.271478	0.972512	0.70975	1.22861	0.722756	-0.620521	-1.50444	-0.362605	-1.8591	1.04781	0.201665	Les.3065.1.S1_at; Solyc10g009080.3; Squamosa promoter-binding-like protein [Source:UniProtKB/TrEMBL;Acc:K4CY84]	5	1.07703	1.11669e-05	0.00194303	19	-0.850913	0.244846	0.351667	1.23154	0.976221	0.936597	-1.53149	-1.18814	-0.579273	-1.16904	0.645748	0.932237	LesAffx.60610.1.S1_at; Solyc11g065190.2; nan	95	27.2302	0.00351198	0.00370504	2	-1.05903	-0.297145	1.70551	-1.23814	1.37094	-1.82473	-0.456154	-0.131136
Glutaric.acid..2.oxo...1MEOX...2TMS.	0	0	0	0.000309119	157	0.846242	-0.160763	0.338482	-0.103772	0.928392	-1.36155	-0.00277501	-0.149899	1.66443	-1.75757	0.747141	-0.988355	Histidine	0	0	0	0.000306435	148	-1.26762	-0.0758029	0.289799	1.09455	0.894823	-0.686721	-1.44029	-0.82156	0.0217857	0.991932	1.63977	-0.640663	lc_neg_984_C00005432.Quercetin.3.7.di.O.alpha.L.rhamnopyranoside.C00005178.Kaempferol.3.galactoside.7.rhamnoside.	4	0.536172	0	0.000890383	4	-0.416355	0.205421	-1.19172	0.661165	-1.34658	0.883169	-1.72921	-0.654175
Glycerol.3.phosphate..DL...4TMS.	0	0	0	0.000309119	158	1.01568	1.37374	-0.0135534	-0.326981	-1.28919	-0.02222	0.377526	0.6216	1.29796	-0.315076	-1.74764	-0.971846	Piperidin.2.one..3.amino...2TMS.	0	0	0	0.000306435	149	-0.941253	-0.243407	0.0391456	1.11479	0.864557	0.134147	-1.39543	-1.82944	0.485886	0.0724534	1.57973	0.118815	lc_neg_1216_C00002268.Tomatine.Toma02.alpha.Tomatine.isomer.Toma01.alpha.Tomatine.	2	0.423985	0	0.00127409	15	-1.29768	-1.23449	0.124814	-0.399714	-0.517493	0.417643	-1.23771	-0.713129
Glycine..3TMS.	0	0	0	0.000309119	140	-1.1105	-0.0886097	0.666444	0.825658	1.50689	-0.452511	0.249874	-0.91496	0.215118	-1.8925	1.25089	-0.255792	LesAffx.66814.1.S1_at; Solyc03g119250.3; nan	0	0	0	0.000306435	131	1.59809	-0.882775	-0.651965	0.40994	-0.667994	0.570709	1.76445	-0.186787	-0.63911	0.569976	-1.50995	-0.374588	GC_195_Tryptamine..5.hydroxy...4TMS.	4	0.440895	5.58344e-06	0.000334682	1	-0.305813	-0.0871229	-0.625824	0.526915	-0.848211	2.67456	-0.930711	0.0524762
Histidine	0	0	0	0.000309119	152	-1.03853	-0.851109	0.511841	0.653587	1.10417	-1.10431	-0.733961	-1.26489	0.908801	0.772478	1.51221	-0.470281	Pipecolic.acid..2TMS.	0	0	0	0.000306435	143	0.644124	1.07747	1.04156	0.631695	0.20441	-0.830806	-0.198554	0.503588	0.766762	-0.379946	-1.41703	-2.04328	GC_291_Asparagine	7	1.84053	0.000251255	0.00164728	1	-0.592845	-0.309312	-0.709221	-0.233168	2.34928	0.921819	1.68859	-0.476076
Homoserine..DL...3TMS.	0	0	0	0.000309119	155	-0.148936	0.401881	1.19073	0.480905	0.538425	-0.016163	-0.529648	-0.859577	0.844836	-2.55956	0.762518	-0.105414	Raffinose..11TMS.	0	0	0	0.000306435	146	0.176668	0.356348	-0.00878498	-1.48041	-1.46608	0.240545	1.20535	1.26529	0.528716	0.223277	-1.64249	0.60156	lc_neg_487_C00002500.Scopolin.	0	0	0	0.000276651	85	0.41849	-0.385439	0.851668	0.544319	-0.448494	1.5567	-2.05942	-0.0388541
IAA	1	0.122334	0	0.000627971	7	-0.665326	-0.323763	0.721545	1.68951	0.159772	0.961217	-1.14458	-0.972586	0.184645	1.36543	-1.09147	-0.884405	Les.2765.2.S1_at; Solyc03g113220.3; nan	8	1.67722	0.000429925	0.00172656	8	1.4076	-0.918384	-0.723199	-1.00451	-0.983737	0.237055	1.64148	0.33992	-0.51685	1.2618	-0.951665	0.210481	LesAffx.44395.1.S1_at; Solyc04g080540.2; nan	87	17.3156	0.00396983	0.00243251	2	0.944447	0.375408	-1.38946	1.04613	-1.02107	2.25268	-0.0401494	0.127288
IAAsp	0	0	0	0.000309119	165	-0.697615	-0.18126	0.809804	1.19438	0.194357	0.523546	-1.29942	-1.36491	1.18346	1.31454	-0.84951	-0.827373	GA19	0	0	0	0.000306435	156	1.39622	-0.0810029	-0.940407	-0.125407	-1.31439	-0.16699	1.88149	-0.0296031	0.536036	0.780922	-0.77525	-1.16161	cZROG	0	0	0	0.000276651	89	-0.0239145	0.212441	0.4513	0.112617	-0.848801	-0.163379	0.731658	-0.300931
iP7G	6	1.55295	1.67503e-05	0.00361356	7	-0.782299	-0.0976912	0.87338	1.65173	0.725926	1.12201	-1.55174	-1.02678	-0.504666	0.804315	-0.588804	-0.625386	Les.2723.2.S1_at; Solyc04g077615.1; nan	21	3.11157	0.011809	0.00220711	8	-1.11006	0.842928	0.823876	1.20103	1.03602	-0.617749	-1.44333	-0.522682	0.587843	-1.21346	0.988902	-0.573309	LesAffx.44139.1.S1_at; Solyc08g078890.2; nan	41	5.91344	0.000770515	0.00115452	1	-0.990941	-0.488329	1.84492	-0.566834	1.79273	-0.644372	0.488837	-1.00974
iPRPs	3	0.432463	0	0.0011678	7	-1.20703	-0.0161386	0.78076	1.48157	0.449227	1.25324	-0.945132	-0.906822	-0.665115	1.25608	-0.481571	-0.999065	Les.1966.1.A1_at; nan; nan	4	0.439949	0.0027973	0.000796657	8	-1.56279	0.932372	0.644257	0.652636	0.984068	-0.670045	-1.62436	-0.595651	0.695034	-0.668232	1.22753	-0.0148208	LesAffx.4297.1.S1_at; Solyc01g009040.3; nan	76	23.4333	0.00154661	0.00330599	2	-1.31917	-0.482176	1.66437	-1.30805	1.13011	-1.52005	-0.634736	0.392619
JA	0	0	0	0.000309119	167	1.44424	-0.739391	0.23945	0.628575	-0.400117	0.728417	1.37452	-1.24706	-0.892704	0.924589	-1.08132	-0.979204	SA	0	0	0	0.000306435	158	-0.990635	1.84366	-0.0641452	-0.755032	0.167667	-0.692938	-1.36892	1.45034	0.415261	-0.934098	0.668533	0.260305	IAA	0	0	0	0.000276651	91	-0.275439	-0.175885	-0.242608	-0.452563	-0.320159	-1.4191	-1.39733	0.913815
Les.1077.1.S1_at; Solyc02g078150.3; nan	0	0	0	0.000309119	33	-1.32739	-1.77486	-0.2315	-0.18681	-0.457175	-0.221211	1.2514	0.593899	-0.728793	1.31217	0.923391	0.846877	Les.1401.2.S1_at; Solyc01g067660.3; Beta-amylase [Source:UniProtKB/TrEMBL;Acc:Q5NE19]	1	0.743073	0	0.0020429	26	-0.420581	-1.12668	-0.862488	-0.0343267	0.2302	0.593436	0.879357	0.552011	-1.73814	1.61299	-0.752084	1.0663	LesAffx.66472.1.S1_at; Solyc01g109390.3; nan	41	7.05681	0.00628137	0.00135146	1	-0.85076	0.328317	0.808054	-0.277008	1.00213	-1.05777	0.950093	-2.0736
Les.108.1.S1_at; Solyc06g064520.3; nan	0	0	0	0.000309119	34	1.09623	0.849697	0.346254	-0.128781	-1.57882	-0.620317	0.697828	0.609487	0.0852945	1.08616	-0.502945	-1.94008	Les.2026.1.S1_at; Solyc10g008400.2; nan	1	0.743079	0	0.0020429	27	-0.585088	-0.658666	-0.933276	0.863299	0.780884	0.891694	-0.456859	0.0669417	-1.65275	1.66757	-0.851213	0.867467	LesAffx.66556.1.S1_at; Solyc02g091520.3; nan	58	14.0568	0.00975986	0.00213194	2	0.81471	0.579772	-1.37574	1.27653	-1.05612	1.84969	0.787768	-0.162124
Les.1087.1.A1_at; Solyc04g072940.3; nan	57	9.86551	0.00231713	0.00312994	2	0.620203	-0.675021	-0.732138	-1.69167	-0.785359	0.844133	1.69718	0.719877	-0.335795	0.389079	-0.965588	0.915102	Les.3470.1.S1_at; Solyc01g096810.3; EIL3 [Source:UniProtKB/TrEMBL;Acc:Q94FV2]	92	13.8933	0.0156169	0.00570255	1	0.554021	-0.810295	-0.614175	-1.05388	-0.998999	0.857415	0.985007	0.85357	-0.772206	1.40534	-1.31263	0.906833	Les.1929.2.S1_at; Solyc07g066470.3; Porphobilinogen deaminase, chloroplastic [Source:Projected from Arabidopsis thaliana (AT5G08280) UniProtKB/Swiss-Prot;Acc:Q43316]	119	19.8881	0.000977102	0.00272074	1	-1.15795	-1.03299	0.74037	-1.28205	1.49942	-1.2132	1.03615	0.00649855
Les.1138.1.A1_at; nan; nan	80	14.1884	0.0214963	0.00413909	3	0.379956	-0.775001	-0.269673	-1.48255	-1.17158	0.10004	1.68195	0.921054	-0.0158225	1.33837	-1.0179	0.311151	Les.2208.1.A1_at; nan; nan	17	2.64516	0.000284756	0.000865244	2	-0.325143	0.866164	1.26998	0.0946363	0.865017	-0.538052	-1.359	-0.948945	1.2087	-1.14062	0.997387	-0.990122	Les.417.1.S1_at; Solyc04g078195.1; nan	78	11.7545	0.000960352	0.0018022	3	-1.54871	-0.881711	0.185756	-1.25978	0.767398	-1.08514	1.0382	-0.921422
Les.1189.1.A1_at; Solyc10g078360.2; nan	0	0	0	0.000309119	35	-0.577146	0.0768707	0.468537	-0.0348355	0.359438	1.48057	-1.42997	-1.26463	-0.0226345	-1.33143	0.899575	1.37565	Les.2026.2.A1_at; nan; nan	1	0.743079	0	0.0020429	27	-0.447899	-0.508291	-0.909626	0.822235	0.667496	0.953164	-0.446208	0.106729	-1.76753	1.61729	-0.973566	0.886207	LesAffx.66767.1.S1_at; Solyc10g007310.1; nan	13	2.326	0.0102121	0.00249989	9	-0.658024	-0.267137	-1.00599	0.641333	0.079909	1.45973	1.62447	-1.54444
Les.1192.2.S1_at; Solyc02g089075.1; nan	55	9.55751	0.00207704	0.00337152	3	-0.414911	0.116304	0.273172	1.02828	1.45923	0.661013	-1.55712	-1.18599	-0.591366	-1.32402	0.808889	0.726517	Les.2452.2.A1_at; nan; nan	2	0.260855	0	0.000414414	2	-0.601845	0.96768	1.27216	-0.0480848	0.574509	-0.684145	-1.31499	-0.893836	1.66145	-0.495451	0.690351	-1.1278	Les.4223.1.S1_at; Solyc08g075540.3; nan	79	11.436	0.0018872	0.00159196	2	1.48752	0.171041	-0.835386	1.15203	-1.37299	1.90367	-0.887437	0.0132763
Les.1205.1.A1_at; nan; nan	70	11.0213	0.00173645	0.00299743	2	-0.467121	1.32325	0.620646	1.50743	0.741466	-0.824943	-1.60399	-0.579078	-0.0203615	-0.948337	0.932842	-0.681811	Les.3519.1.S1_at; Solyc01g107730.3; CycD3;2 protein [Source:UniProtKB/TrEMBL;Acc:Q9SMD5]	14	1.96498	0.000491343	0.00147071	1	-1.11331	0.876894	0.804591	0.631326	0.862204	-1.44994	-1.23086	-0.36334	1.15219	-0.20698	1.03887	-1.00165	Les.1929.3.S1_at; Solyc07g066470.3; Porphobilinogen deaminase, chloroplastic [Source:Projected from Arabidopsis thaliana (AT5G08280) UniProtKB/Swiss-Prot;Acc:Q43316]	154	27.1031	0.00254047	0.00363612	1	-1.12532	-0.906112	0.633166	-1.33577	1.45305	-1.45	1.05136	0.0161476
Les.1213.1.A1_at; Solyc06g068540.3; nan	60	9.45164	0.00635396	0.00279415	3	0.261244	-0.77436	-0.11406	-1.50116	-1.0677	0.100289	1.56446	1.04235	0.00348298	1.35567	-1.19834	0.328131	Les.2651.1.A1_at; nan; nan	43	13.6564	0.00155778	0.00267332	2	-0.0443392	0.934022	1.0103	0.0984235	0.629984	-0.33506	-1.49793	-1.18624	1.36354	-1.46915	0.878409	-0.381955	Les.4233.1.S1_at; Solyc01g057000.3; nan	21	3.41136	0.00536569	0.00259287	2	-0.5499	-0.146644	-1.42195	1.06266	-0.899055	2.01016	1.40154	-0.591746
Les.1219.1.A1_at; Solyc02g084430.3; nan	0	0	0	0.000309119	36	-1.89893	-1.04714	-0.858041	-0.0797731	0.970665	0.38275	1.09758	-0.181984	-0.956616	0.593879	1.03983	0.937775	Les.3225.2.S1_at; Solyc02g036350.3; 1-aminocyclopropane-1-carboxylate oxidase [Source:UniProtKB/TrEMBL;Acc:A4ZYQ6]	1	0.91632	0	0.0020429	28	0.230524	0.462548	0.743818	-0.427219	-0.876199	-0.906482	0.577341	1.37737	0.311966	1.30361	-1.88243	-0.914844	LesAffx.66847.1.S1_at; Solyc09g072800.3; nan	86	26.7892	0.00357899	0.00362703	2	-1.3687	-0.59422	1.73733	-1.28022	1.37345	-1.42863	-0.384996	0.0728729
Les.122.1.S1_at; Solyc02g082920.3; Acidic 26 kDa endochitinase [Source:UniProtKB/Swiss-Prot;Acc:Q05539]	34	5.10363	0.0026968	0.00229629	3	0.670985	-0.170356	-0.0689513	-0.985638	-1.23173	-0.741794	1.55648	1.00806	0.223248	1.52455	-1.08128	-0.703579	Les.309.1.A1_at; Solyc02g067100.3; nan	46	13.9521	0.00310998	0.00293501	2	-0.253091	0.918839	1.04614	0.125237	0.640394	-0.415826	-1.31473	-1.11436	1.3697	-1.52481	0.9997	-0.477194	Les.4233.2.A1_at; Solyc01g057000.3; nan	20	3.23516	0.0025963	0.00235912	2	-0.523348	-0.136888	-1.54993	1.10045	-0.874463	1.99476	1.35025	-0.542694
Les.123.1.S1_at; Solyc09g011640.3; nan	0	0	0	0.000309119	37	0.659877	-0.156378	-0.776866	-0.495239	-0.77024	-0.13832	2.66944	-0.204181	-0.600356	0.877184	-0.859905	-0.205015	Les.3225.3.S1_at; Solyc02g036350.3; 1-aminocyclopropane-1-carboxylate oxidase [Source:UniProtKB/TrEMBL;Acc:A4ZYQ6]	1	0.91632	0	0.0020429	28	0.145561	0.48619	0.776384	-0.37246	-0.837663	-0.968079	0.512725	1.399	0.32804	1.29632	-1.89706	-0.868961	LesAffx.66879.1.A1_at; Solyc02g087970.1; Mini zinc finger protein [Source:UniProtKB/TrEMBL;Acc:A0ZXL1]	0	0	0	0.000276651	52	0.0744113	0.26009	0.288215	0.293297	0.904932	0.27617	1.24415	-0.667765
Les.1230.1.A1_at; Solyc02g083630.3; L-ascorbate peroxidase 5, peroxisomal [Source:Projected from Arabidopsis thaliana (AT4G35970) UniProtKB/Swiss-Prot;Acc:Q7XZP5]	0	0	0	0.000309119	38	0.621818	-0.528749	-0.21457	0.541082	1.13713	1.01707	0.560043	-0.582499	-2.09914	-1.25257	-0.199336	0.999724	Les.10.1.S1_at; Solyc06g066820.3; nan	0	0	0	0.000306435	29	0.115335	-0.669178	-1.24307	-0.470905	-1.21788	1.55785	0.97852	0.714072	-0.238364	-0.117385	-0.959324	1.55032	LesAffx.6688.1.S1_at; Solyc09g092480.2; nan	26	3.70633	6.14179e-05	0.000726453	2	1.70067	0.498262	-0.439722	1.45349	-0.67481	1.05963	0.750708	-0.191393
Les.127.1.S1_at; Solyc01g087850.2; Subtilisin-like protease [Source:UniProtKB/TrEMBL;Acc:O82777]	1	0.136451	0	0.000413866	2	0.123255	0.676149	0.493133	0.955695	0.85901	-1.30591	-1.62745	-0.30506	0.0676553	1.17553	0.488363	-1.60037	Les.3524.1.S1_at; Solyc06g074240.2; nan	32	4.95597	0.0011111	0.00278567	1	0.871432	-0.665606	-0.777556	-1.04198	-1.11978	1.5076	1.07904	0.460188	-0.788839	0.239762	-0.999464	1.2352	Les.1934.1.A1_at; nan; nan	9	1.1771	0.00032384	0.00063673	1	0.783636	0.764379	-0.236948	0.353687	-1.42602	-0.392128	-1.24582	0.84479
Les.1298.1.S1_at; Solyc04g076850.3; Auxin-responsive protein [Source:UniProtKB/TrEMBL;Acc:K4BUC3]	5	1.12629	0	0.00144788	17	-0.79676	-1.11063	-1.0539	-1.28773	-0.95025	-0.380115	1.02095	0.930864	0.930421	0.708995	0.818547	1.16961	Les.2852.1.S1_at; Solyc08g080650.2; nan	1	0.13483	0	0.0020429	13	0.159248	0.258015	0.0693787	-0.64426	-0.760634	-0.614171	-0.0606116	1.36817	0.468168	2.13319	-1.01034	-1.36616	LesAffx.51979.1.S1_at; Solyc01g111380.3; nan	75	11.2813	0.00415408	0.00163042	2	1.18611	0.707434	-1.74969	0.86344	-1.32946	1.37909	-0.556622	1.22448
Les.1314.1.S1_at; Solyc03g098320.3; nan	1	0.276466	0	0.00206079	19	-1.97117	-1.12658	-0.573388	0.427364	1.01937	-0.341675	0.666207	-0.153302	-0.775505	1.31815	1.09508	0.415446	Les.3070.1.S1_at; Solyc06g062370.3; nan	1	0.33117	0	0.0020429	18	-1.52239	0.883886	-0.196808	0.810416	0.320772	0.251438	-1.37792	-0.746315	0.947908	-1.2191	1.4197	0.428416	LesAffx.59463.1.S1_at; Solyc02g082850.3; nan	70	9.77488	0.000429925	0.00141829	1	1.14733	1.34189	-0.884542	1.38323	-0.916747	1.14161	-0.407479	0.756412
Les.132.1.S1_at; Solyc07g049550.3; 1-aminocyclopropane-1-carboxylate oxidase 4 [Source:UniProtKB/Swiss-Prot;Acc:P24157]	2	0.238619	5.58344e-06	0.00300764	6	-0.47569	-0.252559	0.790245	-0.543663	-0.670158	-0.826387	0.804649	0.605947	0.502404	2.23886	-1.17609	-0.997562	LesAffx.64946.1.S1_at; Solyc01g090300.3; nan	1	0.116598	0	0.0020429	7	-1.49572	1.37863	0.105355	1.57199	0.450064	-0.572025	-1.08714	-0.498391	0.626281	-0.826997	0.974988	-0.627031	LesAffx.35945.1.S1_at; Solyc04g071940.3; Xanthoxin dehydrogenase [Source:Projected from Arabidopsis thaliana (AT1G52340) UniProtKB/Swiss-Prot;Acc:Q9C826]	178	33.6237	0.0188888	0.00436383	2	-1.1961	-0.798734	1.21196	-1.12102	1.4013	-1.86522	0.569389	-0.204325
Les.1331.1.A1_at; nan; nan	64	10.6781	0.00326073	0.00295204	2	0.12713	1.24029	0.577488	1.35518	0.593605	-0.5523	-1.98848	-0.59663	0.492747	-0.775584	0.585367	-1.05882	Les.3590.1.S1_at; Solyc01g099630.3; Probable xyloglucan endotransglucosylase/hydrolase 1 [Source:UniProtKB/Swiss-Prot;Acc:Q40144]	76	11.5397	0.00873809	0.0045587	1	-0.222305	0.776885	0.806443	1.1413	1.09418	-0.80899	-1.14634	-0.754961	0.60304	-1.58927	0.989127	-0.889117	Les.1936.1.S1_at; Solyc09g082690.3; Early light inducible protein [Source:UniProtKB/TrEMBL;Acc:Q6QDC5]	0	0	0	0.000276651	27	-0.96703	0.962245	0.234699	1.45313	0.667525	1.01763	-0.0962822	-0.917272
Les.1334.1.A1_at; Solyc11g007400.1; nan	28	3.93831	0.00034059	0.00124516	2	0.589736	-0.700545	-0.546989	-1.41524	-0.662909	0.588928	1.99684	0.707105	-0.660334	1.11745	-0.94682	-0.0672175	Les.3594.1.S1_at; Solyc02g092790.3; nan	56	7.11826	0.0135063	0.00306956	1	-0.420264	0.931984	0.785325	1.05991	0.880797	-0.853857	-1.46885	-0.527842	0.814321	-1.36109	1.01392	-0.854348	Les.195.1.S1_at; Solyc01g095320.3; nan	6	0.927281	0	0.00107839	2	-0.327724	-0.122782	-1.18603	0.676767	-0.821681	1.3146	2.41273	-0.879638
Les.1389.1.S1_at; Solyc10g075090.2; Non-specific lipid-transfer protein 2 [Source:UniProtKB/Swiss-Prot;Acc:P93224]	23	3.7514	0.000139586	0.00152516	2	-0.331388	1.00679	0.383764	1.46303	1.12668	-0.812873	-1.4625	-0.429705	-0.0105469	-0.0824331	0.792429	-1.64325	Les.3620.1.S1_at; Solyc02g071730.3; Floral homeotic protein AGAMOUS [Source:UniProtKB/Swiss-Prot;Acc:Q40168]	48	7.21441	0.00137353	0.00323837	1	0.551267	-0.821326	-0.76544	-1.12525	-1.21356	1.16059	0.749955	0.511703	-0.586305	1.25946	-0.991168	1.27007	Les.1967.1.A1_at; nan; nan	18	2.7518	0.00231713	0.0016025	1	1.03009	0.702543	-1.59642	0.336926	-1.17011	-0.799228	-0.8819	1.19056
Les.1394.1.A1_at; Solyc02g065470.1; nan	72	11.5284	0.00207704	0.00309731	2	-0.154573	1.15183	0.669563	1.49259	0.556155	-0.679837	-1.79303	-0.416297	0.0836322	-1.00091	0.994273	-0.903392	Les.3637.1.S1_at; Solyc06g059840.3; nan	11	1.70695	5.0251e-05	0.00176966	1	1.07422	-0.270633	-0.346961	-1.41459	-1.39221	0.949059	1.11778	0.745371	-0.330595	0.35899	-1.39608	0.905648	Les.1988.1.A1_at; nan; nan	88	13.2094	0.00238413	0.00205885	1	1.23072	0.794394	-1.42121	0.91463	-1.67137	0.9967	-0.249821	1.09075
Les.1401.1.S1_at; Solyc01g067660.3; Beta-amylase [Source:UniProtKB/TrEMBL;Acc:Q5NE19]	19	3.25536	0.00401449	0.00148186	4	-0.820128	-1.41473	-0.451894	-0.920794	0.53922	0.109822	1.53208	0.634937	-1.19883	1.56633	-0.134515	0.558497	LesAffx.25451.1.S1_at; Solyc09g082860.3; nan	8	0.931474	0.000452259	0.000774522	3	0.341009	-0.522249	-0.694941	-1.14913	-1.21576	0.431837	1.46495	1.47033	-0.45597	0.913383	-1.19246	0.608996	LesAffx.17157.1.S1_at; Solyc08g066860.2; nan	49	6.81546	0.000725847	0.00115431	1	1.06528	1.35353	-1.4668	1.42136	-1.21054	0.454685	-1.61715	0.366298
Les.1401.2.S1_at; Solyc01g067660.3; Beta-amylase [Source:UniProtKB/TrEMBL;Acc:Q5NE19]	11	1.67521	0.000848683	0.00102238	4	-0.913213	-1.51101	-0.346917	-1.02119	0.520528	0.21639	1.54367	0.556006	-1.10442	1.51267	0.112387	0.435097	LesAffx.269.2.S1_at; Solyc09g075020.3; nan	9	1.17514	0.00234505	0.00103706	3	1.2052	-0.530153	-0.588093	-1.65286	-1.30998	0.293404	1.52295	0.746443	-0.00958398	0.949892	-0.766856	0.139635	LesAffx.17303.1.A1_at; Solyc10g080670.2; nan	20	3.09661	0.00354549	0.00151369	2	0.117674	0.0571343	-1.07109	1.17447	-0.903374	2.2188	0.443039	-0.955143
Les.144.1.S1_at; nan; nan	9	1.12324	0.00231154	0.00124889	3	-0.472827	-0.110089	-0.174079	0.637095	1.80175	1.04354	-0.9399	-1.08445	-0.780085	-1.45687	0.661003	0.874907	Les.351.1.S1_at; Solyc10g074730.2; nan	41	18.1411	0	0.00329829	2	0.026965	0.851195	0.869304	0.317171	0.649376	-0.326957	-1.33144	-0.96881	1.2964	-1.92014	0.845877	-0.30895	Les.4274.1.S1_at; Solyc06g064820.3; nan	11	1.74081	0.000580678	0.00162556	2	-0.276161	0.420099	1.0005	-0.587294	0.791052	-2.08644	-1.66133	0.7735
Les.1451.1.A1_at; nan; nan	0	0	0	0.000309119	39	1.30393	0.268099	0.258093	-1.38799	-1.40753	0.437751	1.32732	0.701728	-0.323157	0.287598	-1.61222	0.146376	Les.108.1.S1_at; Solyc06g064520.3; nan	0	0	0	0.000306435	30	0.329413	0.93242	0.816186	-0.202802	-0.110547	-1.68541	0.0454035	0.757966	0.150563	1.17729	-0.0968722	-2.11361	LesAffx.66974.1.S1_at; Solyc08g076850.3; nan	69	9.90126	0.00112227	0.00144215	1	-1.08639	-1.31589	0.581942	-1.377	1.12446	-1.2428	0.315609	-0.218618
Les.1459.1.A1_at; Solyc01g098740.3; nan	0	0	0	0.000309119	40	1.16347	-0.0786874	0.257834	-0.966434	-1.86372	1.21595	0.487069	-0.268578	0.471433	-0.948172	-0.763837	1.29367	Les.1175.2.S1_at; Solyc03g025670.3; nan	0	0	0	0.000306435	31	1.99291	-0.367947	-0.147173	-0.692864	-0.769096	-0.478445	1.7827	-0.0736607	-0.362401	0.858615	-0.857264	-0.885374	LesAffx.66981.1.S1_at; Solyc08g066840.3; Aquaporin TIP4-1 [Source:Projected from Arabidopsis thaliana (AT2G25810) UniProtKB/Swiss-Prot;Acc:O82316]	2	0.30733	0	0.000774985	7	0.701707	0.487139	-1.10501	-0.119489	-0.798525	-2.08747	-1.00023	0.981756
Les.147.1.S1_at; Solyc12g006140.2; Chlorophyll a-b binding protein, chloroplastic [Source:UniProtKB/TrEMBL;Acc:K4DBF1]	21	3.07892	0.000134003	0.00132489	3	-0.995427	-0.0329279	0.140213	1.45932	1.87754	0.109892	-0.971444	-1.30918	-0.820302	-0.513955	0.818802	0.237469	Les.3713.1.S1_at; Solyc04g082840.3; B2-type cyclin dependent kinase [Source:UniProtKB/TrEMBL;Acc:Q9FSH4]	36	13.8536	0	0.00253231	2	0.0807576	0.790223	0.917849	0.163379	0.564034	-0.0870686	-1.45813	-0.843721	1.24606	-2.04362	0.772443	-0.102217	Les.4301.1.S1_at; Solyc04g082010.1; Plastocyanin, chloroplastic [Source:UniProtKB/Swiss-Prot;Acc:P17340]	113	19.803	0.00159128	0.00303089	3	-1.88143	-0.851979	0.185735	-0.944122	1.03256	-0.927892	1.16207	-0.503535
Les.15.1.S1_at; Solyc04g078110.1; nan	0	0	0	0.000309119	41	-1.23675	-0.0544877	0.913326	0.584348	-0.370121	-1.53885	0.0985791	0.474803	-0.25128	1.85373	0.748284	-1.22158	Les.1189.1.A1_at; Solyc10g078360.2; nan	0	0	0	0.000306435	32	-0.665709	0.0509098	0.629652	-0.150187	0.457091	1.32301	-1.55685	-0.677349	0.0785088	-1.52363	0.347961	1.6866	LesAffx.67147.1.S1_at; Solyc05g055760.3; Isopentenyl diphosphate isomerase [Source:UniProtKB/TrEMBL;Acc:A9LRT7]	78	12.0216	0.00221663	0.00179985	1	-0.876607	-0.633176	1.80864	-1.30976	1.34906	-1.0022	0.263967	-1.09653
Les.1511.2.S1_at; Solyc08g077510.3; nan	4	0.622411	0.00647679	0.00245517	10	-0.83028	0.761697	0.586524	1.49209	1.33329	-1.4264	-0.939575	0.165025	-0.43428	-0.0498983	0.678402	-1.33659	Les.4944.1.S1_at; Solyc12g099430.2; nan	8	1.10134	0.00467892	0.00117891	8	1.43956	-0.552736	-0.612339	-0.715165	-1.07666	0.706707	1.43666	0.630121	-1.06573	0.336251	-1.31892	0.792248	LesAffx.46815.1.S1_at; Solyc01g086920.3; nan	66	9.98966	0.0032384	0.00158773	3	-1.17146	-0.409824	-0.312723	-0.853203	0.457706	-2.09467	1.41012	-0.139072
Les.16.1.S1_at; Solyc08g065790.3; nan	38	6.03379	0.000770515	0.00192454	2	-0.503918	1.09218	0.310088	1.32993	0.905646	-1.01509	-1.72776	-0.793353	0.456849	-0.152648	1.04563	-0.947542	Les.3692.1.S1_at; Solyc06g065820.3; Ethylene response factor 1 [Source:UniProtKB/TrEMBL;Acc:Q8S9H4]	39	6.45915	0.00624229	0.00328599	1	-0.815709	0.914857	0.699033	1.11346	0.91638	-1.38134	-1.30991	-0.472135	0.91541	-0.506071	0.95945	-1.03342	Les.2001.1.S1_at; nan; nan	1	0.371874	0	0.00107193	13	-0.583416	-0.31481	-1.49118	0.610687	-1.74519	1.74673	0.969557	1.22773
Les.1603.1.A1_at; Solyc12g011280.2; Chlorophyll a-b binding protein, chloroplastic [Source:UniProtKB/TrEMBL;Acc:K4DCL4]	65	13.9032	0.0015522	0.00415958	3	-0.643171	0.392825	0.534782	1.20719	1.40857	0.373562	-1.31328	-1.36881	-0.747128	-1.18842	0.887792	0.456097	Les.4032.1.A1_at; Solyc02g093720.3; nan	43	19.2363	0	0.0035163	2	-0.0575949	0.781094	0.884442	0.241781	0.649981	-0.216569	-1.32608	-1.09102	1.30155	-1.85421	0.959684	-0.273063	Les.4317.1.S1_at; Solyc06g007180.3; nan	100	15.9395	0.00548852	0.00235704	2	0.790725	0.144084	-0.868349	1.30166	-1.2285	2.28192	-0.262831	0.189599
Les.1606.1.S1_at; Solyc04g010250.3; nan	7	0.896038	2.79172e-05	0.000550965	1	-0.134734	-1.12316	-0.116807	-1.50827	0.855225	0.0510779	1.15464	0.730174	-1.00036	1.32817	-1.12765	0.891687	Les.1087.1.A1_at; Solyc04g072940.3; nan	15	2.35686	0.00735898	0.00191927	1	0.602668	-0.444752	-0.644986	-1.12067	-1.32564	1.29723	0.928863	0.800688	-0.626396	0.234817	-1.14147	1.43965	Les.1013.1.A1_at; Solyc10g078440.1; nan	71	10.8741	0.000770515	0.00151548	1	0.832319	-0.339858	-0.537482	1.20251	-1.4661	2.19589	-0.736673	0.593626
Les.1650.1.A1_at; Solyc10g081560.2; nan	25	3.78973	0.000764932	0.00133087	2	1.17542	-0.574832	-0.677002	-1.75763	-0.892727	0.559725	1.34522	0.925331	-0.65541	0.786731	-0.783814	0.548996	Les.37.1.S1_at; Solyc02g061770.3; nan	1	0.118357	0	0.000404839	1	1.52777	-0.15325	-0.269471	-1.13748	-1.11051	1.19969	1.39009	0.430438	-0.648134	-0.370333	-1.31254	0.453726	Les.2014.1.A1_at; Solyc05g014000.3; Pectate lyase [Source:UniProtKB/TrEMBL;Acc:K4BYC1]	33	5.19231	0.000145169	0.000991739	3	-1.54022	-0.175688	-0.501747	-0.300022	0.237252	-1.43665	1.47689	-1.24353
Les.167.1.S1_at; Solyc11g066390.2; Superoxide dismutase [Cu-Zn] [Source:UniProtKB/TrEMBL;Acc:Q7XAV2]	0	0	0	0.000309119	42	0.355794	0.988535	0.449917	1.67154	1.27522	-0.0864574	-1.27878	-1.07247	-0.628681	-1.41207	0.0374763	-0.300018	Les.1230.1.A1_at; Solyc02g083630.3; L-ascorbate peroxidase 5, peroxisomal [Source:Projected from Arabidopsis thaliana (AT4G35970) UniProtKB/Swiss-Prot;Acc:Q7XZP5]	0	0	0	0.000306435	33	0.540444	-0.71718	-0.831352	0.368779	0.450798	1.22116	0.890217	-0.422651	-1.62044	-1.48861	0.272948	1.33588	LesAffx.67395.1.S1_at; Solyc01g098390.3; nan	162	29.6205	0.00737014	0.00400774	1	0.971652	0.86412	-0.77367	1.33952	-1.32255	1.72101	-1.22844	-0.0888473
Les.169.1.S1_at; Solyc10g078340.2; nan	25	11.6698	0	0.00331365	4	0.486229	1.11656	0.554496	0.870461	-0.125817	0.200779	-1.9265	-1.102	0.851124	-1.5714	0.506546	0.139525	LesAffx.27006.1.S1_at; Solyc01g090740.3; nan	34	4.38736	0.0239418	0.0030416	3	0.822976	-0.340377	-0.441163	-1.23917	-1.29883	0.766668	0.996147	1.00618	-0.619343	1.123	-1.44902	0.67295	LesAffx.17303.1.S1_at; nan; nan	19	2.75247	0.000982686	0.00146868	2	-0.0492982	-0.0807454	-0.941741	1.09995	-0.941554	2.47436	0.355577	-0.909275
Les.1721.2.S1_at; Solyc11g066950.2; nan	8	0.959438	0.00156895	0.000740183	3	0.35738	0.886784	0.484107	1.02438	0.830728	0.591491	-1.86273	-1.21267	0.0338157	-1.61839	0.447308	0.0378122	Les.4072.1.S1_at; Solyc07g065210.3; nan	41	18.1153	0	0.00328329	2	0.0361735	0.868726	0.909354	0.240344	0.650496	-0.202239	-1.36124	-0.981681	1.20502	-1.95754	0.852616	-0.260025	Les.4333.1.S1_at; Solyc10g075110.2; nan	9	1.78421	0.000418758	0.00135869	1	0.880041	0.778443	-0.43824	0.67368	-2.35533	0.164077	-1.42293	0.716011
Les.1724.1.S1_at; Solyc10g084410.2; nan	2	0.517497	0	0.0016914	15	0.255839	-0.702183	-0.513305	-1.34143	0.136581	1.23962	2.00817	0.376151	-1.08521	0.389608	-1.09879	0.334963	TAG_52.3...M.NH4...	1	0.125661	0	0.0020429	10	0.0559741	0.650767	0.920325	0.915391	0.807615	0.0576344	-0.833589	-1.84833	0.843148	-1.74468	0.507046	-0.3313	LesAffx.51318.1.A1_at; nan; nan	1	0.463915	0	0.00184434	18	-0.898155	-0.823647	-0.547334	-1.24762	-0.835908	-1.2748	0.236732	1.36822
Les.1724.2.S1_at; Solyc10g084410.2; nan	3	0.645708	0.00432158	0.00188746	15	0.334224	-0.637565	-0.664403	-1.34771	0.165649	0.925255	2.01202	0.568798	-1.18744	0.543995	-1.0666	0.353773	Les.3646.1.S1_at; Solyc12g096730.2; nan	1	0.128595	0	0.0020429	11	-0.551894	0.713991	0.81908	-0.23749	-0.542258	-1.01864	-1.01978	1.26148	0.743461	1.74855	-0.80214	-1.11436	LesAffx.51318.1.S1_at; Solyc08g082770.3; Bidirectional sugar transporter SWEET [Source:UniProtKB/TrEMBL;Acc:K4CPS3]	1	0.463915	0	0.00184434	18	-0.625778	-0.988311	-0.789797	-1.43308	-0.517988	-1.46013	0.713149	1.32285
Les.1762.1.S1_at; Solyc08g007040.3; Glycine cleavage system H protein [Source:UniProtKB/TrEMBL;Acc:K4CIJ1]	47	8.38362	0.00126186	0.00276349	3	-0.242028	0.409895	0.256813	1.03968	1.35903	0.632103	-1.3323	-1.2584	-0.79967	-1.52013	0.806931	0.648078	Les.412.1.A1_at; Solyc02g067950.3; nan	37	13.2329	0	0.00244669	2	-0.1004	0.929357	0.856218	0.0511274	0.515908	-0.118792	-1.43402	-1.21658	1.44111	-1.65547	0.860123	-0.128586	Les.4345.1.S1_at; nan; nan	35	8.48965	1.11669e-05	0.00142737	3	-1.86888	-1.39762	-0.751142	-0.625485	0.517768	-0.812767	1.22182	0.108435
Les.177.1.S1_at; Solyc09g074230.3; nan	5	0.713784	0	0.000803412	3	0.563892	0.398531	0.199285	-0.823907	-1.85046	-1.26871	0.798696	1.1885	0.855652	1.13037	-0.584447	-0.6074	Les.470.1.S1_at; Solyc07g066050.3; nan	35	10.9856	1.11669e-05	0.00206277	2	-0.0593392	0.654682	0.820753	0.160855	0.504893	0.216942	-1.48014	-0.930356	1.2706	-2.05113	0.827164	0.0650795	Les.435.1.S1_at; Solyc05g050130.3; nan	34	5.48111	0.00016192	0.00107545	3	2.50113	0.575644	0.0616038	0.418849	-0.963747	0.251961	-1.46151	0.632924
Les.1785.1.A1_at; Solyc05g010180.3; nan	54	8.32503	0.00348965	0.00261797	3	-0.251129	0.793702	0.101041	1.28802	1.50487	0.316288	-1.62619	-1.09627	-0.350346	-1.3168	0.746954	-0.110145	Les.5032.1.S1_at; nan; nan	37	12.3426	3.35007e-05	0.00230321	2	-0.16717	0.759323	0.880877	0.0219945	0.771628	-0.315212	-1.40831	-1.2737	1.37473	-1.59629	0.938317	0.0138036	Les.4356.2.S1_at; Solyc01g080460.3; Pyruvate, phosphate dikinase 1, chloroplastic [Source:Projected from Arabidopsis thaliana (AT4G15530) UniProtKB/Swiss-Prot;Acc:O23404]	28	4.3747	0.000346173	0.00184115	2	0.163022	0.451567	-1.1574	1.39824	-0.708092	1.99259	0.596259	-1.32264
Les.1864.1.S1_at; Solyc07g043580.3; nan	2	0.293799	0	0.000429075	2	-0.403182	0.748024	1.01664	1.55819	1.3592	-0.850873	-1.40761	-0.870771	-0.417766	0.27044	0.113445	-1.11573	Les.3700.1.S1_at; Solyc07g008240.3; Non-symbiotic hemoglobin class 1 [Source:UniProtKB/TrEMBL;Acc:Q9AWA9]	23	3.19984	8.37516e-05	0.00168516	1	-0.892248	0.786589	0.797622	1.03416	1.07261	-1.73239	-0.720964	-0.122247	0.620732	-0.513312	0.950435	-1.281	Les.2027.2.S1_at; Solyc10g005100.3; plasma-membrane associated cation-binding protein 1 [Source:Projected from Arabidopsis thaliana (AT4G20260) TAIR;Acc:AT4G20260]	10	1.73194	0.00996086	0.00222641	9	-0.919095	-0.343071	-0.141657	0.409165	0.817478	1.53911	0.960064	-1.50448
Les.1880.1.A1_at; Solyc11g012680.2; nan	38	6.60682	0.00268564	0.00191068	1	-0.518483	-1.20828	-0.685109	-1.27361	-0.13451	0.451071	1.85662	0.605225	-0.607241	1.4322	-0.559592	0.64171	Les.109.1.S1_at; Solyc02g084720.3; Beta-galactosidase [Source:UniProtKB/TrEMBL;Acc:Q9LLS9]	24	3.41837	0.0066108	0.00204924	1	-0.846976	0.812316	0.752416	1.37153	1.11523	-0.81765	-1.50555	-0.746021	0.521633	-0.924331	0.933001	-0.665603	Les.103.1.S1_at; Solyc11g005090.2; Cyclin A1 [Source:UniProtKB/TrEMBL;Acc:Q9XGI5]	73	18.6073	0.00746506	0.00297797	2	-0.636384	-0.298574	1.66847	-1.18808	1.22384	-1.87852	-1.0615	0.213425
Les.1891.1.A1_at; nan; nan	8	2.25735	0	0.00279194	17	0.963654	1.01828	0.861514	0.821739	0.903239	1.15257	-0.851639	-0.9528	-0.984146	-0.932617	-1.029	-0.970799	Les.3619.1.S1_at; Solyc08g080630.3; nan	1	0.13483	0	0.0020429	13	0.102238	-0.133423	-0.206506	-0.416648	-0.692367	-0.696987	-0.0876532	1.36109	0.333521	2.41749	-1.07084	-0.909906	LesAffx.52437.1.S1_at; Solyc02g082450.3; nan	113	19.731	0.00108877	0.002695	1	0.618422	0.90796	-0.839264	1.70018	-1.08299	1.82127	-1.14794	0.177883
Les.191.1.S1_at; Solyc06g051800.3; Expansin [Source:UniProtKB/TrEMBL;Acc:O04359]	10	1.44388	0.000156336	0.000775816	2	-0.38533	1.0624	0.606893	1.10641	0.751909	-0.828903	-1.96621	-0.454715	0.709762	0.295931	0.50237	-1.40052	Les.3707.1.S1_at; Solyc06g084070.3; Auxin-responsive protein [Source:UniProtKB/TrEMBL;Acc:G9HPV3]	14	1.92646	0.0023618	0.0012694	1	-0.9376	0.514998	0.613255	0.738543	0.912415	-0.784613	-0.977793	-0.980931	1.41636	-0.993812	1.34847	-0.869282	Les.207.1.S1_at; Solyc01g079880.3; nan	63	12.0704	0.00201004	0.00176617	2	1.1203	0.808647	-2.17631	0.979836	-1.27569	1.10804	0.124734	0.892477
Les.192.2.S1_at; Solyc01g099840.3; nan	1	0.147453	0	0.000372074	3	0.303705	-0.540563	-0.394835	-1.32479	0.113332	-0.574431	1.56221	1.30696	-0.49487	1.59275	-1.11456	-0.434905	Les.5082.1.S1_at; Solyc03g096870.3; nan	46	14.6582	0	0.00297127	2	-0.11169	0.878863	1.01342	0.195885	0.683669	-0.468691	-1.2233	-1.028	1.35844	-1.66523	0.965574	-0.598933	Les.4359.1.S1_at; Solyc08g067320.2; nan	82	14.966	0.000703514	0.00227465	3	-1.36964	-1.30895	-0.0202519	-1.11522	0.791349	-1.31885	0.85701	-0.133755
Les.1928.1.A1_at; nan; nan	5	0.692026	0.000100502	0.00101356	17	1.24473	0.730428	0.95134	0.585593	0.532746	1.39782	-0.970067	-0.777023	-0.886483	-1.16628	-1.26365	-0.37916	Les.2286.1.S1_at; Solyc07g022900.3; Photosystem I chlorophyll a/b-binding protein 5, chloroplastic [Source:Projected from Arabidopsis thaliana (AT1G45474) UniProtKB/Swiss-Prot;Acc:Q9C639]	1	0.140268	0	0.0020429	14	-1.18005	0.499309	0.570874	1.23504	1.51224	-0.739607	-1.30913	-0.666982	-0.408597	-0.372338	1.38869	-0.52946	LesAffx.53591.1.S1_at; Solyc06g083900.3; nan	4	0.549943	0.00116694	0.00106631	7	0.24345	0.957412	0.369414	0.704332	-0.368135	-1.26354	-2.46841	0.985555
Les.1934.1.A1_at; nan; nan	8	1.07289	5.58344e-06	0.000567967	2	-0.247867	-1.06652	-0.763269	-1.36171	-0.926907	-0.454162	1.56795	1.14354	0.232328	0.880768	-0.278973	1.27482	Les.3721.1.S1_at; Solyc03g115650.3; Eukaryotic translation initiation factor 5A-1 [Source:UniProtKB/Swiss-Prot;Acc:Q9AXQ6]	18	3.38688	4.46675e-05	0.00141438	1	-0.0562286	-0.924282	-0.643035	-0.491162	-0.751016	0.695032	0.600319	0.923285	-0.962073	2.0294	-1.23373	0.813491	Les.208.1.S1_at; Solyc09g075210.3; Heat shock protein [Source:UniProtKB/TrEMBL;Acc:Q42475]	33	6.62905	1.11669e-05	0.00106171	2	0.538166	0.792919	-1.18574	1.05471	-2.25142	1.12902	0.530642	-0.548006
Les.1936.1.S1_at; Solyc09g082690.3; Early light inducible protein [Source:UniProtKB/TrEMBL;Acc:Q6QDC5]	3	0.380857	1.67503e-05	0.000462618	2	-1.1074	0.552762	-0.229882	1.53861	1.25559	-1.04428	-1.20364	-0.107033	-0.0955938	0.118216	1.35412	-1.03147	Les.3761.1.S1_at; Solyc05g006980.3; nan	38	6.10392	0.000982686	0.00254518	1	0.246341	-0.700521	-0.639334	-1.10008	-1.05007	0.742318	0.650634	1.07196	-0.566036	1.7037	-1.2556	0.896685	Les.2084.1.S1_at; Solyc04g005610.3; NAC domain-containing protein 2 [Source:UniProtKB/Swiss-Prot;Acc:K4BNG7]	42	6.47174	0.00300389	0.00170055	4	0.29653	0.683781	-0.770494	1.49522	-0.895321	2.33025	-0.800482	-0.701454
Les.1966.1.A1_at; nan; nan	36	4.81352	0.00234505	0.0015289	2	-0.381427	1.10029	0.601933	1.15311	0.662409	0.270858	-1.93651	-1.18178	0.450405	-1.27443	0.669336	-0.134196	Les.3932.1.S1_at; Solyc10g085550.2; nan	52	9.63584	0.000815182	0.00359773	1	-0.224766	0.845427	0.766173	0.726371	0.861495	-0.760612	-0.936641	-0.657243	1.00035	-1.93567	1.0776	-0.762482	Les.21.1.S1_at; Solyc01g087780.2; Subtilisin-like protease [Source:UniProtKB/TrEMBL;Acc:O82006]	0	0	0	0.000276651	28	-0.37227	-0.410018	1.40395	0.927004	1.50978	1.07497	-1.51294	0.52961
Les.1967.1.A1_at; nan; nan	16	2.23966	2.23338e-05	0.000946479	2	1.15806	-0.719576	-0.681766	-1.52965	-0.763863	0.840937	1.46011	0.724581	-0.991626	0.18831	-0.655359	0.969842	Les.3932.2.S1_at; Solyc10g085550.2; nan	60	11.0439	0.0016862	0.00411786	1	-0.245678	0.834888	0.845239	0.76252	0.903316	-0.758648	-1.0303	-0.669126	0.966474	-1.87441	1.01693	-0.751204	Les.2164.1.A1_at; Solyc12g096900.2; nan	0	0	0	0.000276651	29	0.864807	-0.673465	0.080687	-0.0599072	1.12721	0.0421448	1.06159	-1.43601
Les.2001.1.S1_at; nan; nan	0	0	0	0.000309119	43	-0.256573	-1.44943	0.433665	-1.00531	-1.02317	0.12788	1.38431	0.816848	-0.650139	1.53224	-0.734054	0.823731	Les.1314.1.S1_at; Solyc03g098320.3; nan	0	0	0	0.000306435	34	-0.874878	-0.622651	-0.866205	-0.0703927	0.708914	-0.45796	0.968513	0.439361	-1.99438	1.60815	0.510029	0.651508	LesAffx.67531.1.S1_at; Solyc09g083290.3; Auxin-responsive protein [Source:UniProtKB/TrEMBL;Acc:G9HPW2]	50	7.47723	0.000904518	0.0011425	2	-0.973641	-1.10629	1.97139	-0.96918	1.05315	-0.998661	0.360435	-0.782401
Les.2026.1.S1_at; Solyc10g008400.2; nan	2	0.810952	0	0.0011646	4	-1.17863	-1.54276	-0.156194	-0.300076	0.620695	-0.297416	1.14921	1.02257	-1.27395	1.60699	0.104865	0.2447	LesAffx.3624.1.A1_at; Solyc09g009420.1; Protein BIC1 [Source:Projected from Arabidopsis thaliana (AT3G52740) UniProtKB/Swiss-Prot;Acc:Q9LXJ1]	8	0.854299	9.49185e-05	0.000665792	3	-0.748108	0.688074	0.923879	0.631507	1.50514	-0.610393	-1.19665	-1.06545	-0.186753	-1.2392	1.38942	-0.091458	LesAffx.17773.1.S1_at; Solyc09g075890.3; nan	6	0.962378	0.00584586	0.000930192	2	-0.969288	-0.570731	-1.28215	0.932167	-0.22412	2.22064	0.901602	-0.44215
Les.2026.2.A1_at; nan; nan	2	0.812028	0	0.00116543	4	-1.12245	-1.52423	-0.243277	-0.229785	0.682482	-0.31592	1.1727	1.01533	-1.41631	1.4801	0.17712	0.324237	LesAffx.49476.1.S1_at; Solyc11g009020.2; nan	34	5.70463	0.00205471	0.00283433	3	-0.741265	0.476019	0.195537	1.23138	1.35772	0.00485652	-1.30097	-1.0717	0.00835164	-1.55259	1.24612	0.146545	LesAffx.1861.2.S1_at; Solyc04g009860.3; nan	35	5.69395	0.000284756	0.00110059	3	2.2753	0.238152	-0.237011	0.940581	-0.960281	1.06795	-1.09627	0.370896
Les.2027.2.S1_at; Solyc10g005100.3; plasma-membrane associated cation-binding protein 1 [Source:Projected from Arabidopsis thaliana (AT4G20260) TAIR;Acc:AT4G20260]	5	0.982269	2.79172e-05	0.00276613	22	-0.820973	0.405717	0.266698	1.01885	1.24842	-1.44616	-1.15962	0.139268	-0.432226	1.04351	1.0361	-1.29959	Les.3065.2.A1_at; Solyc10g009080.3; Squamosa promoter-binding-like protein [Source:UniProtKB/TrEMBL;Acc:K4CY84]	5	1.01859	0.0093411	0.00183412	19	-0.692921	0.324877	0.398102	1.17495	0.869819	1.02134	-1.6779	-1.14728	-0.514321	-1.24132	0.607237	0.877415	LesAffx.60610.2.S1_at; Solyc11g065190.2; nan	96	27.0582	0.000429925	0.00368702	2	-1.03269	-0.261273	1.65761	-1.24724	1.35253	-1.89834	-0.41282	-0.105382
Les.2040.1.A1_at; Solyc07g032480.3; Cyclin-T1-3 [Source:Projected from Arabidopsis thaliana (AT1G27630) UniProtKB/Swiss-Prot;Acc:Q8LBC0]	2	0.388707	0	0.000978213	13	-0.399564	-1.15396	-1.04799	-1.02611	-1.0763	-0.448492	1.65161	0.944924	0.388716	1.33896	0.201486	0.626709	LesAffx.61110.1.S1_at; Solyc01g100930.3; nan	18	2.3194	0.00542152	0.00155504	8	-0.88529	0.812725	0.765708	0.919781	1.00216	-0.445872	-1.70776	-0.837676	0.750057	-1.18678	1.11382	-0.30087	LesAffx.50270.2.S1_at; Solyc02g082900.3; nan	106	16.7643	0.00781124	0.00243346	1	0.793286	0.794264	-0.941256	1.36679	-1.79209	1.77963	-0.666202	-0.272343
Les.207.1.S1_at; Solyc01g079880.3; nan	39	6.31978	0.00863758	0.00224116	1	0.382483	-1.03986	-0.644731	-1.55345	0.0271375	0.551915	1.70237	0.933289	-1.0235	1.05456	-0.757813	0.367594	Les.1138.1.A1_at; nan; nan	18	2.39852	0.000429925	0.00134589	1	0.744973	-0.421614	-0.521971	-1.04556	-1.28154	0.879303	0.802634	0.786312	-0.495886	1.46436	-1.55513	0.644114	Les.104.1.S1_at; Solyc02g082820.3; Cyclin B2 [Source:UniProtKB/TrEMBL;Acc:Q9XGI1]	75	23.6734	0.000273589	0.00330556	2	-1.21516	-0.528603	1.72649	-1.46979	1.24271	-1.39515	-0.6419	0.40987
Les.208.1.S1_at; Solyc09g075210.3; Heat shock protein [Source:UniProtKB/TrEMBL;Acc:Q42475]	40	6.62526	0.00289222	0.00208868	3	0.144686	-0.625064	0.152464	-1.34391	-1.50205	-0.192804	1.42791	1.24576	0.229919	1.47286	-0.772119	-0.237655	Les.5138.1.S1_at; Solyc09g056385.1; nan	4	0.48695	8.37516e-05	0.000467107	2	-0.55556	1.14887	1.14488	0.58597	0.435882	-0.517896	-1.70164	-0.951808	1.27241	-0.929124	0.731498	-0.663482	Les.4445.1.S1_at; Solyc10g047030.2; nan	13	2.05942	0.00724731	0.00125176	2	0.0656048	0.000268208	1.22085	-0.990013	0.814172	-2.2807	-0.277147	0.952853
Les.21.1.S1_at; Solyc01g087780.2; Subtilisin-like protease [Source:UniProtKB/TrEMBL;Acc:O82006]	0	0	0	0.000309119	44	-1.78716	-0.102752	0.296583	1.45251	1.21184	-0.466521	-1.10477	-1.07553	0.29116	-0.252564	1.08815	0.449042	Les.132.1.S1_at; Solyc07g049550.3; 1-aminocyclopropane-1-carboxylate oxidase 4 [Source:UniProtKB/Swiss-Prot;Acc:P24157]	0	0	0	0.000306435	35	0.325286	0.467382	0.823796	-1.0546	-1.09363	-0.438807	0.1341	1.16856	0.105502	1.85429	-1.28179	-1.01009	LesAffx.67559.1.A1_at; nan; nan	16	2.45205	0.00798432	0.00204141	1	1.4557	0.675461	-1.26241	0.00595011	-1.23278	-1.0318	-1.32588	0.824011
Les.2137.1.S1_at; Solyc07g008620.1; Receptor-like protein EIX1 [Source:UniProtKB/Swiss-Prot;Acc:Q6JN47]	27	3.67204	0.000346173	0.00117034	2	0.143316	-0.479194	-0.0238104	-1.38636	-0.996427	-0.110212	2.27334	0.630928	-0.554478	0.875264	-0.932261	0.559894	Les.3932.3.S1_at; Solyc10g085555.1; nan	47	8.33377	0.00371299	0.00315523	1	-0.193439	0.889859	0.859433	0.751252	0.897296	-0.722528	-0.961316	-0.586228	0.873876	-2.00554	0.955242	-0.757911	Les.2168.1.S1_at; Solyc08g013670.3; nan	2	0.45583	0	0.00210669	11	-0.361946	0.755058	-1.48512	1.43483	0.060271	0.732151	0.972039	-1.0245
Les.2168.1.S1_at; Solyc08g013670.3; nan	0	0	0	0.000309119	45	-1.59198	-0.367008	-0.142006	0.81479	1.62095	0.368241	0.0150959	-1.43889	-1.09287	0.0175791	0.845731	0.95037	Les.1451.1.A1_at; nan; nan	0	0	0	0.000306435	36	1.07086	0.542827	0.484155	-1.31627	-1.15093	0.93386	0.879245	0.644321	-0.457894	0.0172377	-1.97256	0.325146	LesAffx.67559.1.S1_at; Solyc02g078100.3; nan	8	1.5766	0	0.00126764	1	1.01376	0.646148	-1.36892	0.370138	-1.67467	-0.585563	-1.67306	0.786774
Les.2170.1.A1_at; Solyc10g080950.2; nan	22	10.1938	0.000798432	0.00289417	4	0.561844	1.09806	0.578546	0.840937	-0.000866499	0.295417	-1.96713	-1.06193	0.645062	-1.64032	0.455329	0.195051	LesAffx.49981.1.S1_at; Solyc01g107070.3; nan	23	3.20035	0.00395308	0.00169251	3	0.78169	-0.616767	-0.78807	-0.912006	-1.09015	0.508589	1.54954	1.09194	-0.74534	1.26235	-1.16259	0.120818	LesAffx.1861.4.S1_at; nan; nan	36	5.65539	7.81682e-05	0.00107532	3	2.15271	0.183336	-0.27697	0.938333	-0.918181	1.22943	-1.17422	0.554508
Les.218.1.S1_at; Solyc02g080200.3; nan	37	6.84428	0.00154661	0.00209492	3	-0.638982	0.663035	0.72866	1.10988	1.30915	0.636302	-1.52307	-1.24328	-0.356027	-1.4031	0.520377	0.197053	Les.5152.1.S1_at; Solyc11g072630.2; Mitogen-activated protein kinase [Source:UniProtKB/TrEMBL;Acc:E2GLN8]	35	5.68409	0.00739248	0.001518	2	0.0447551	1.02518	0.92234	0.322856	0.694049	-0.677259	-0.826071	-1.09926	1.31138	-1.60227	0.908386	-1.02408	Les.4460.1.S1_at; Solyc01g097240.3; Pathogenesis-related protein P2 [Source:UniProtKB/Swiss-Prot;Acc:P32045]	40	7.2474	2.79172e-05	0.00132782	3	2.37007	0.30397	0.161912	0.738833	-1.10584	0.973773	-0.984253	0.26491
Les.218.3.S1_at; Solyc02g080200.3; nan	29	5.41638	7.25847e-05	0.00170739	3	-0.559661	0.543059	0.684469	0.999744	1.5093	0.963542	-1.32437	-1.40599	-0.58393	-1.21341	0.415436	-0.0281956	Les.5715.1.S1_at; Solyc06g069400.3; nan	10	1.30243	0.000134003	0.000754674	2	-0.532299	1.1368	0.8348	0.347336	0.513853	-0.588518	-1.54699	-0.716756	1.43616	-1.11401	1.05278	-0.823155	Les.4467.1.S1_at; Solyc10g075070.2; Non-specific lipid-transfer protein [Source:UniProtKB/TrEMBL;Acc:K4D1U9]	9	1.56651	0	0.00158713	9	-1.10563	0.00295639	-0.387722	0.402085	-0.475105	0.765494	1.75036	-1.42838
Les.22.1.S1_at; Solyc10g086220.2; 12-oxophytodienoate reductase 1 [Source:UniProtKB/Swiss-Prot;Acc:Q9XG54]	93	14.5257	0.00538244	0.00381476	2	0.273672	-0.914273	-0.694399	-1.70734	-0.831474	0.385491	1.66352	0.679562	-0.198691	1.25283	-0.664999	0.756099	Les.4065.1.A1_at; Solyc01g066560.3; Protein DETOXIFICATION [Source:UniProtKB/TrEMBL;Acc:K4AWQ7]	45	7.17067	0.00302064	0.00451353	1	0.893238	-0.481564	-0.682749	-1.18907	-1.23852	1.20199	1.0758	0.787376	-0.801114	0.432452	-1.11815	1.12032	Les.2170.1.A1_at; Solyc10g080950.2; nan	97	27.685	0.00283639	0.00377217	2	-1.45608	-0.365273	1.53339	-1.21914	1.2883	-1.73289	-0.245283	0.0933996
Les.2207.1.A1_at; Solyc12g040790.2; nan	16	2.54917	0	0.000912278	2	0.574576	1.41182	0.872222	1.26756	0.626076	-0.132329	-1.71151	-1.00665	-0.395126	-1.01246	0.324646	-0.818817	Les.4099.1.S1_at; Solyc06g053620.3; nan	11	1.25222	0.00032384	0.000916296	1	0.502064	-0.834449	-0.738941	-0.8679	-1.07957	0.933146	1.20955	1.19811	-1.03208	0.7789	-1.06964	1.00081	Les.2207.1.A1_at; Solyc12g040790.2; nan	36	4.5153	0.000268005	0.000800313	1	-1.24368	-0.736545	0.786542	-0.88397	1.55999	-0.877552	-0.441194	-1.01352
Les.221.1.S1_at; Solyc02g081190.3; nan	48	7.27216	0.000848683	0.00209127	2	0.45145	-0.911709	-0.32113	-1.64652	-1.44873	0.557084	1.647	0.76033	-0.296437	0.693193	-0.354525	0.86999	Les.414.1.S1_at; Solyc05g009360.3; nan	18	2.21916	0.00395866	0.00157563	1	0.625916	-0.476065	-0.678806	-1.06897	-1.2332	0.799206	1.28099	1.08576	-0.614659	0.969233	-1.40393	0.714529	Les.2256.1.S1_at; Solyc03g111730.3; nan	0	0	0	0.000276651	30	-1.01244	-0.892466	0.690125	-0.627154	1.23832	0.621636	2.27436	-0.724524
Les.224.1.S1_at; Solyc04g014510.3; Glutamine synthetase [Source:UniProtKB/TrEMBL;Acc:K4BPV5]	0	0	0	0.000309119	46	1.79524	0.435474	0.287846	-1.44994	-0.775288	0.855236	0.649574	0.0445184	-0.64946	-0.394861	-1.57167	0.773323	Les.147.1.S1_at; Solyc12g006140.2; Chlorophyll a-b binding protein, chloroplastic [Source:UniProtKB/TrEMBL;Acc:K4DBF1]	0	0	0	0.000306435	37	-1.18271	0.114623	0.348907	1.40036	1.62419	-0.536325	-0.984084	-0.830478	-1.12047	-0.388335	1.16918	0.385142	LesAffx.67643.1.S1_at; Solyc04g078460.3; nan	3	0.442726	0.00174762	0.00110168	7	0.792007	0.518034	-0.554518	0.226674	-0.711559	-1.84296	-1.71351	0.546112
Les.2268.1.A1_at; nan; nan	38	7.76125	0.00053601	0.0025305	1	0.0986587	-1.06442	-0.22906	-1.36321	0.144193	0.0665089	1.57957	1.00213	-0.886337	1.47126	-1.16336	0.344067	Les.1205.1.A1_at; nan; nan	20	3.14673	5.58344e-06	0.00155927	1	-0.538436	0.882159	0.697194	1.2097	1.08027	-1.35922	-0.483757	-0.414397	0.399913	-1.25496	1.07472	-1.29319	Les.1077.1.S1_at; Solyc02g078150.3; nan	2	0.4778	0.00279172	0.00120212	13	-0.171245	-0.129439	-1.58376	0.73197	-1.40482	1.58199	0.96417	1.44743
Les.233.1.S1_at; Solyc07g047850.3; nan	25	4.20739	8.37516e-05	0.0014636	3	-0.898277	0.291315	0.22376	0.872367	1.532	0.606134	-1.01277	-1.82521	-0.627774	-0.7524	0.794825	0.796027	Les.687.1.S1_at; Solyc02g087880.3; Tubulin alpha chain [Source:UniProtKB/TrEMBL;Acc:K4BBU4]	42	17.5112	0.00113344	0.00321385	2	-0.0532888	0.742907	0.892678	0.145707	0.686266	-0.298943	-1.32882	-0.893195	1.35673	-1.91331	0.956868	-0.293608	Les.4468.2.S1_at; Solyc08g074620.2; nan	12	1.80893	0.00141261	0.00124681	2	0.0835048	-0.133043	1.00215	-0.754935	1.18817	-2.05515	-1.48781	1.03661
Les.2351.1.S1_at; Solyc04g077130.1; plastid-specific 50S ribosomal protein 6 [Source:Projected from Arabidopsis thaliana (AT5G17870) TAIR;Acc:AT5G17870]	67	10.2731	0.0199441	0.00299649	1	-0.232708	1.09993	0.235123	1.3353	0.54347	-0.379095	-1.82491	-0.915494	0.720743	-1.39315	0.905978	-0.0951874	Les.1331.1.A1_at; nan; nan	29	3.70213	0.00295922	0.00182417	1	-0.115808	0.925986	0.892542	0.853019	0.904874	-1.10465	-1.25062	-0.606887	0.939791	-1.07059	0.942337	-1.31	Les.1079.1.S1_at; Solyc04g050730.3; LTL1 [Source:Projected from Arabidopsis thaliana (AT3G04290) UniProtKB/TrEMBL;Acc:A0A178VLC7]	4	1.01802	0.00278614	0.0016018	14	-0.637536	0.0474735	0.223373	-0.638679	0.682287	-2.32391	-1.49411	0.33526
Les.2353.1.A1_at; Solyc10g079910.2; nan	73	11.6272	0.00556111	0.00342727	2	0.611962	-0.790821	-0.712293	-1.65383	-0.814389	0.514096	1.73835	1.03859	-0.262134	0.58229	-0.929046	0.677215	Les.415.1.A1_at; Solyc08g005680.3; Dimethylallylcistransferase, chloroplastic [Source:UniProtKB/Swiss-Prot;Acc:C1K5M2]	14	1.99586	0.000201004	0.00119411	1	-0.437325	0.871205	0.994966	1.3999	1.15819	-1.01129	-0.853654	-0.945791	0.10247	-1.08949	0.879399	-1.06858	Les.228.1.S1_at; Solyc12g009650.2; nan	56	9.46125	0.00336123	0.00168079	2	-0.945877	-0.517089	0.716626	-1.39186	0.798999	-2.08459	-0.566309	0.948572
Les.2417.1.S1_at; Solyc06g076790.1; nan	18	2.72766	0.000977102	0.00127119	3	-0.853485	-0.0887466	-0.0766891	1.23607	1.65348	0.533323	-0.854701	-0.95507	-0.718649	-1.49449	0.87412	0.74483	Les.687.2.S1_at; Solyc02g087880.3; Tubulin alpha chain [Source:UniProtKB/TrEMBL;Acc:K4BBU4]	41	15.4484	3.35007e-05	0.00283544	2	-0.0206463	0.748813	0.858923	0.155818	0.647809	-0.235873	-1.27949	-0.810562	1.30906	-2.06871	0.927429	-0.232568	Les.4496.1.S1_at; nan; nan	0	0	0	0.000276651	41	0.948589	0.246785	-0.729004	0.489708	-0.80204	0.72429	1.65838	-0.582072
Les.2417.2.A1_at; Solyc06g076790.1; nan	26	3.89341	0.000569511	0.00144876	3	-1.02036	0.274121	-0.0016158	1.39259	1.50126	0.293479	-0.856415	-0.940996	-0.517385	-1.58367	0.999259	0.459736	LesAffx.13481.1.S1_at; Solyc12g014420.2; nan	12	1.80661	0.000139586	0.000932608	2	-0.305234	0.878186	1.07618	0.0544146	0.645196	-0.862755	-1.31241	-1.08046	1.58259	-0.894295	1.00255	-0.783958	Les.45.1.S1_at; Solyc08g080650.2; nan	43	6.33775	0.000798432	0.00105152	2	1.09951	0.679492	-0.236321	1.43462	-1.1773	1.63038	0.382685	0.00314856
Les.2460.1.S1_at; Solyc10g009150.3; nan	1	0.34761	0	0.00206079	25	0.914537	-0.0332096	-0.497277	1.2566	0.386671	-0.478175	1.27324	1.01511	-1.80548	-1.33934	-0.265924	-0.426745	Les.2584.2.S1_at; Solyc10g050110.1; nan	3	1.03222	0	0.00219548	21	-0.920466	0.445827	0.493599	1.29194	1.2095	-1.21529	-1.19242	0.0250018	-0.437724	1.04556	0.655879	-1.40141	LesAffx.63523.1.S1_at; Solyc08g006470.3; nan	39	6.27783	0.000390841	0.00110021	2	2.21256	-0.350479	-0.892463	0.685076	-1.03048	1.62604	0.16198	0.323547
Les.2460.2.S1_at; Solyc10g009150.3; nan	1	0.34761	0	0.00206079	25	0.844199	-0.066059	-0.70327	1.38035	0.382271	-0.485226	1.37728	1.10333	-1.27461	-1.4708	-0.480305	-0.607151	LesAffx.1475.1.S1_at; Solyc10g005100.3; plasma-membrane associated cation-binding protein 1 [Source:Projected from Arabidopsis thaliana (AT4G20260) TAIR;Acc:AT4G20260]	4	1.10789	0	0.00241991	21	-1.02119	0.636919	0.447108	1.1637	0.960671	-1.36665	-1.13576	-0.31052	-0.0817437	1.0682	0.961473	-1.32221	LesAffx.64054.3.S1_at; Solyc05g006730.3; nan	30	4.04066	0.000993853	0.00129828	3	-1.00296	-0.657817	-0.8161	-0.730295	0.335932	-0.597623	2.33702	-0.560901
Les.2493.1.A1_at; Solyc08g007120.3; nan	32	5.65033	0.000240088	0.00177256	3	-0.114844	0.97702	0.32408	1.07789	1.57826	0.0184525	-1.63376	-1.15002	-0.447354	-1.34956	0.390743	0.329097	LesAffx.13481.2.A1_at; Solyc12g014420.2; nan	21	3.34576	0.00490785	0.00149513	2	-0.212268	0.943087	1.05689	0.137119	0.748295	-0.608682	-1.51448	-1.22771	1.3524	-0.903252	0.988188	-0.759585	Les.4523.1.S1_at; Solyc01g081050.3; nan	28	3.76041	0.00485759	0.0015012	2	-0.0938266	0.233826	-0.817255	1.33517	-0.78106	2.29882	0.94436	-0.776123
Les.25.1.S1_at; Solyc09g065180.3; nan	29	4.25527	0.00460634	0.00161519	3	-0.449218	0.443702	0.0630753	1.6778	1.67794	-0.283807	-1.36254	-0.834395	-0.633182	-0.989357	0.943224	-0.253252	LesAffx.19390.1.S1_at; Solyc04g081650.3; nan	43	19.5932	0	0.00357581	2	-0.0964179	0.851829	0.947547	0.211698	0.697953	-0.228673	-1.38159	-0.981648	1.27142	-1.86284	0.860277	-0.289559	Les.4529.1.S1_at; Solyc02g091920.3; Xyloglucan endotransglucosylase/hydrolase [Source:UniProtKB/TrEMBL;Acc:K4BCZ0]	6	0.909622	0.00548294	0.00085915	19	-0.212493	-0.583292	0.0457576	-0.24915	0.727724	-0.326853	2.38011	-1.06158
Les.2504.1.A1_at; Solyc09g091550.3; nan	25	3.89362	6.14179e-05	0.0013479	3	-1.08607	0.117556	0.683605	1.17951	1.31881	0.617779	-1.09345	-1.32986	-0.920242	-0.841592	1.11929	0.234677	LesAffx.39988.1.S1_at; Solyc07g066540.1; nan	46	14.367	0.00212729	0.00290456	2	-0.191808	0.848887	1.02444	0.157194	0.666862	-0.417894	-1.27428	-1.24379	1.37962	-1.53522	0.980862	-0.394869	Les.4583.1.S1_at; Solyc07g006220.2; nan	30	4.96695	3.35007e-05	0.0010889	1	-1.39974	-0.0510277	0.412853	-0.0332257	0.893571	-0.44244	1.6301	-1.81068
Les.2517.2.S1_at; Solyc06g081980.1; nan	44	7.20857	0.00629254	0.00256325	3	-0.450408	0.437692	0.0492085	1.014	1.21986	0.633401	-1.37669	-1.28928	-0.319271	-1.5834	1.09043	0.574462	LesAffx.41988.1.S1_at; Solyc06g053760.3; SYP111 [Source:Projected from Arabidopsis thaliana (AT1G08560) UniProtKB/TrEMBL;Acc:A0A178WAC8]	46	17.3829	0.000307089	0.00334247	2	-0.0730561	0.773172	0.994339	0.320986	0.677845	-0.399239	-1.27906	-1.10271	1.28554	-1.74404	0.976968	-0.430745	Les.4658.1.S1_at; Solyc03g120930.1; nan	17	2.29232	0.0126967	0.00129789	1	0.989624	0.586866	-0.843296	0.321502	-1.1908	0.00530212	-2.06894	1.03509
Les.253.1.S1_at; Solyc08g068150.3; BURP domain protein RD22 [Source:Projected from Arabidopsis thaliana (AT5G25610) UniProtKB/Swiss-Prot;Acc:Q08298]	2	0.31237	0	0.00107278	22	-0.655538	-0.223063	-0.144995	0.744724	1.49869	-1.18426	-1.19486	0.496319	-0.565955	1.45395	0.927372	-1.15239	Les.3174.1.S1_at; Solyc02g062340.3; Fructose-bisphosphate aldolase [Source:UniProtKB/TrEMBL;Acc:K4B6C3]	3	0.724777	0	0.0016281	19	-1.08842	0.146741	0.0794033	1.30049	1.3121	0.359002	-1.24175	-1.21838	-0.887449	-0.718811	0.980776	0.976305	LesAffx.60831.1.S1_at; Solyc09g072700.3; nan	36	4.8003	0.00514235	0.00139866	1	0.998838	0.86396	-0.078453	0.893029	-0.879358	0.127993	-1.94097	0.814777
Les.2560.1.S1_at; Solyc07g049530.3; 1-aminocyclopropane-1-carboxylate oxidase 1 [Source:UniProtKB/Swiss-Prot;Acc:P05116]	39	6.00222	0.0023618	0.00205385	3	0.232416	-0.743536	-0.165006	-1.21241	-1.05903	-0.199419	1.82714	0.699115	0.0609344	1.69034	-1.01664	-0.113907	LesAffx.4297.1.S1_at; Solyc01g009040.3; nan	35	11.0468	2.23338e-05	0.00207356	2	-0.0612617	0.763843	0.892122	-0.0770708	0.458332	0.122624	-1.52798	-0.894128	1.37493	-1.92135	0.816581	0.0533576	Les.470.1.S1_at; Solyc07g066050.3; nan	79	24.925	0.000792849	0.0035248	2	-1.26448	-0.573126	1.56054	-1.33475	1.2026	-1.58845	-0.631421	0.485006
Les.2569.1.S1_at; Solyc05g007770.3; NAC domain-containing protein 1 [Source:UniProtKB/Swiss-Prot;Acc:K4BWV2]	0	0	0	0.000309119	47	-0.294152	-0.528143	0.23387	-0.751031	-0.765675	-0.88857	1.12563	1.02634	-0.00734474	2.29175	-0.605711	-0.836963	Les.16.1.S1_at; Solyc08g065790.3; nan	0	0	0	0.000306435	38	-1.08368	0.19703	0.212077	0.440629	1.07293	-1.08844	-1.00533	-0.402398	0.809933	-0.0482124	2.02569	-1.13023	LesAffx.67747.3.S1_at; nan; nan	83	11.5726	0.00233946	0.00186918	1	-1.41228	-0.833974	0.222199	-0.654109	1.30556	-0.922935	0.977806	-1.25233
Les.2584.1.A1_at; Solyc10g050110.1; nan	4	1.02683	1.67503e-05	0.0027234	22	-0.477047	0.27128	0.583375	0.955393	1.47251	-1.07619	-1.25685	-0.120284	-0.835835	1.23438	0.629874	-1.3806	Les.3995.1.S1_at; Solyc08g078020.1; Methionine rich arabinogalactan [Source:UniProtKB/TrEMBL;Acc:Q52QJ6]	3	0.466115	5.58344e-06	0.00114752	19	-1.29924	0.262905	0.325696	1.11711	0.994851	0.2568	-1.08145	-1.40195	-0.4538	-0.967608	0.996486	1.2502	LesAffx.61034.1.S1_at; Solyc08g077060.3; nan	124	20.058	0.0051926	0.0027803	1	-0.935591	-0.936267	0.340397	-1.66629	0.932054	-1.49224	1.35726	-0.123785
Les.2584.2.S1_at; Solyc10g050110.1; nan	3	0.922649	0	0.00245826	22	-0.485854	0.327174	0.651519	0.984131	1.45181	-1.14179	-1.20571	-0.0883294	-0.924918	1.16402	0.611872	-1.34392	LesAffx.41330.1.A1_at; Solyc06g073290.1; Tetrapyrrole-binding protein, chloroplastic [Source:Projected from Arabidopsis thaliana (AT3G59400) UniProtKB/Swiss-Prot;Acc:Q9LX31]	5	1.13435	0.00234505	0.00234863	19	-0.824925	0.286777	0.286847	1.0774	1.25524	0.430737	-1.50054	-1.26931	-0.814218	-0.883247	0.889094	1.06615	LesAffx.61110.1.S1_at; Solyc01g100930.3; nan	118	19.1905	0.00285872	0.002518	1	-1.82537	-0.258999	1.23503	-0.844181	1.29615	-1.59812	0.595482	-0.659457
Les.2595.1.A1_at; Solyc12g006160.2; nan	7	2.63863	0	0.00305968	17	-0.964203	-0.993506	-0.909625	-0.948206	-0.873634	-0.994192	1.22385	1.08069	0.706594	1.07838	0.737637	0.856215	LesAffx.68294.1.S1_at; Solyc03g080100.3; nan	1	0.140268	0	0.0020429	14	-0.906152	0.386469	0.329448	1.21061	1.75091	-0.522501	-0.991076	-0.939201	-0.579206	-0.505235	1.47116	-0.705224	LesAffx.54522.1.S1_at; Solyc04g078420.1; nan	39	5.97844	0.00017867	0.00104397	3	1.18339	1.06264	-0.230949	1.55738	-0.356387	0.843178	-0.525159	0.998241
Les.2620.1.S1_at; Solyc06g084045.1; nan	72	14.5664	0.00810716	0.00438539	3	-0.335488	0.500369	0.492776	1.38928	1.36505	0.0912562	-1.7031	-1.23857	-0.537973	-1.04502	0.867598	0.153816	LesAffx.44022.1.S1_at; Solyc06g008980.3; nan	45	16.569	0	0.00315847	2	-0.221663	0.889626	0.980362	0.306482	0.719833	-0.293355	-1.34501	-1.19505	1.24379	-1.68288	0.892723	-0.294865	Les.470.2.A1_at; nan; nan	74	22.1022	0.00112786	0.0031905	2	-1.25631	-0.440915	1.48619	-1.3389	1.13494	-1.60073	-0.793214	0.57176
Les.2620.2.S1_at; Solyc06g084045.1; nan	81	17.6683	0.00951418	0.00517711	3	-0.462781	0.400641	0.442772	1.37925	1.42293	0.166099	-1.64762	-1.20415	-0.441612	-1.14089	0.877624	0.207744	LesAffx.46215.1.S1_at; Solyc12g095870.2; nan	46	15.2842	0	0.00305817	2	-0.198525	0.933021	1.01603	0.284537	0.652971	-0.455842	-1.18039	-1.05648	1.33161	-1.72312	0.909545	-0.513371	Les.4710.1.S1_at; Solyc12g040790.2; nan	90	14.2174	0.00132328	0.00195589	1	-1.46185	-0.360775	0.71085	-1.20387	1.20639	-1.64794	0.200552	-0.748412
Les.2620.3.S1_at; Solyc03g117420.3; nan	36	6.6598	0.00106644	0.00218401	1	0.2302	-1.01627	0.0122367	-1.47812	-0.304113	0.0585036	1.54435	0.857041	-0.834298	1.69819	-0.949178	0.181454	Les.1394.1.A1_at; Solyc02g065470.1; nan	47	7.29639	0.00109435	0.00313833	1	-0.34627	0.791073	0.821307	1.16908	0.971953	-1.06361	-0.942597	-0.38065	0.545082	-1.49964	1.0975	-1.16323	Les.1079.2.S1_at; Solyc04g050730.3; LTL1 [Source:Projected from Arabidopsis thaliana (AT3G04290) UniProtKB/TrEMBL;Acc:A0A178VLC7]	4	1.02955	0	0.00161703	14	-0.626948	0.0281868	0.170812	-0.703815	0.630324	-2.26021	-1.52752	0.350317
Les.2626.1.S1_at; Solyc03g093360.3; nan	78	12.9135	0.0109435	0.00388307	3	-0.417264	0.663482	0.402194	1.51025	1.24206	0.0294365	-1.67317	-1.00199	-0.0891239	-1.36841	0.835385	-0.132838	LesAffx.47004.1.S1_at; nan; nan	39	10.9667	0.00312114	0.00210122	2	0.00796524	0.848258	0.859239	0.490215	0.709103	-0.287628	-1.06186	-1.07131	0.999137	-2.08134	0.978844	-0.390617	Les.477.3.A1_at; Solyc08g082120.2; nan	3	0.469154	0.00279172	0.000873463	3	-1.29895	-1.15986	-0.792168	-0.942791	0.142316	0.518594	2.26256	-0.529717
Les.2657.1.S1_at; Solyc01g102280.3; nan	44	7.19267	0.0205024	0.00214001	4	0.113847	-1.21097	-0.641357	-1.15271	0.153103	0.0592532	1.6182	0.928608	-0.943745	1.68225	-0.732274	0.125793	LesAffx.50270.1.S1_at; Solyc02g082900.3; nan	13	2.24025	8.37516e-05	0.00133644	3	0.763159	-0.189305	-0.274603	-1.05808	-1.25187	-0.0823447	1.18765	1.16768	-0.441783	1.74154	-1.22304	-0.339011	LesAffx.19952.1.S1_at; Solyc06g065040.3; nan	88	15.5838	0.000452259	0.00211592	1	0.385278	0.703133	-0.621645	1.51017	-0.996497	1.81371	-1.77292	0.299902
Les.266.1.S1_at; Solyc05g051750.3; nan	0	0	0	0.000309119	48	-0.606041	-1.12247	0.153906	0.141642	1.6994	1.10474	-1.40179	-1.17028	-0.645493	0.277238	0.500463	1.06868	Les.167.1.S1_at; Solyc11g066390.2; Superoxide dismutase [Cu-Zn] [Source:UniProtKB/TrEMBL;Acc:Q7XAV2]	0	0	0	0.000306435	39	0.0553147	-0.492847	0.650036	0.333594	1.40363	-0.768163	-1.12287	-1.36721	0.783574	-1.18302	1.58122	0.126745	LesAffx.69396.1.S1_at; Solyc09g011040.1; Aspartic proteinase PCS1 [Source:Projected from Arabidopsis thaliana (AT5G02190) UniProtKB/Swiss-Prot;Acc:Q9LZL3]	104	16.2268	0.000938018	0.00245699	3	-1.4891	-0.427177	-0.0815283	-0.81472	0.783416	-1.50472	1.77319	-0.722086
Les.2668.2.A1_at; Solyc01g107390.3; nan	0	0	0	0.000309119	49	-0.831916	-0.785978	-0.101034	-1.66008	-1.3009	0.783291	1.10001	0.193489	1.10632	0.879161	-0.460323	1.07796	Les.1936.1.S1_at; Solyc09g082690.3; Early light inducible protein [Source:UniProtKB/TrEMBL;Acc:Q6QDC5]	0	0	0	0.000306435	40	-0.700157	0.796076	0.00293606	1.29077	1.197	-1.56328	-0.66437	-0.272478	-0.205394	0.206887	1.32144	-1.40943	LesAffx.69609.1.S1_at; Solyc09g091550.3; nan	1	0.595629	0	0.00184434	20	-0.954127	-0.76676	-0.410759	-0.713616	1.84187	-0.763654	-0.623374	-0.291172
Les.2696.1.S1_at; Solyc07g065110.1; nan	49	7.44963	0.00739806	0.002181	2	0.272508	1.09373	0.441675	1.195	0.871037	0.138141	-1.9162	-0.842388	0.0578372	-1.55104	0.624513	-0.384811	Les.423.1.S1_at; Solyc09g011470.3; AT5g02020/T7H20_70 [Source:Projected from Arabidopsis thaliana (AT5G02020) UniProtKB/TrEMBL;Acc:Q9LZM9]	40	5.96531	0.00825233	0.00268382	1	0.334742	-0.715168	-0.492605	-1.13621	-0.983113	0.272924	0.940088	1.06163	-0.672602	1.96785	-1.09482	0.51729	Les.2286.1.S1_at; Solyc07g022900.3; Photosystem I chlorophyll a/b-binding protein 5, chloroplastic [Source:Projected from Arabidopsis thaliana (AT1G45474) UniProtKB/Swiss-Prot;Acc:Q9C639]	50	9.89819	0.00113344	0.00169755	3	-1.7982	-0.448502	-0.701996	-0.638769	0.89328	-0.794983	1.20083	-0.896105
Les.270.1.S1_at; Solyc04g074860.3; nan	11	1.67819	5.0251e-05	0.000948488	2	-0.837959	0.882235	0.739796	1.59006	1.45405	-0.735129	-1.16717	-0.684841	-0.383286	-0.033874	0.445522	-1.2694	Les.4300.2.S1_at; Solyc08g067030.3; nan	1	0.102592	0	0.000362929	1	-1.08903	0.544459	0.582636	1.79836	1.19857	-1.14627	-1.10906	-0.055161	-0.0498367	-0.166904	0.695123	-1.20288	Les.2299.1.A1_at; Solyc03g112010.3; nan	2	0.549453	0	0.00144169	10	-1.26613	0.0505141	-1.07885	1.19419	-0.885976	1.5716	-0.590486	-1.61455
Les.274.1.S1_at; Solyc05g052040.1; nan	9	1.04604	0.000145169	0.000570826	4	-0.875291	-0.952821	-0.146228	-0.994747	0.351664	-0.696447	1.5439	0.926315	-0.00874024	1.89878	-0.918038	-0.128348	LesAffx.50270.2.S1_at; Solyc02g082900.3; nan	12	2.13096	5.58344e-06	0.00123935	3	0.801253	-0.127523	-0.226931	-1.08958	-1.29217	-0.0348865	1.14882	1.16983	-0.392571	1.67728	-1.28702	-0.346496	LesAffx.20903.1.S1_at; Solyc05g005865.1; nan	8	1.30601	0	0.000683697	3	-0.955181	-0.378706	-0.584342	-0.446863	-0.0950418	-0.586218	1.73719	-0.918545
Les.2747.1.S1_at; Solyc09g061840.3; nan	28	4.02035	0.00551086	0.00174038	2	0.264795	-1.02098	-0.873977	-1.41397	-0.703713	1.18367	1.87888	0.199804	-0.274191	0.0330055	-0.44834	1.17502	Les.4315.1.S1_at; Solyc08g081400.3; nan	13	1.99976	2.79172e-05	0.00124281	1	0.213764	-0.792558	-0.758264	-1.57824	-1.25729	0.988565	0.780299	0.739201	-0.113545	1.09544	-0.683666	1.36629	Les.23.1.S1_at; Solyc12g013620.2; Jasmonic acid 2 [Source:UniProtKB/TrEMBL;Acc:Q9SQL0]	112	18.5968	0.00914009	0.00254519	2	0.789578	0.394174	-1.53431	1.17992	-1.49619	2.05041	-0.378011	-0.227498
Les.2792.1.A1_at; Solyc06g067980.3; nan	80	10.8526	0.00548852	0.00293411	2	0.167097	-0.88247	-0.704699	-1.6154	-0.548923	0.51406	1.97164	1.01551	-0.46516	0.754065	-0.734074	0.528352	Les.4412.1.A1_at; Solyc11g072130.2; nan	48	7.86828	0.00624229	0.00350884	1	-0.65886	0.815494	0.820899	1.07153	1.07336	-1.31131	-1.32838	-0.1423	0.68039	-1.08763	0.975269	-0.908463	Les.2351.1.S1_at; Solyc04g077130.1; plastid-specific 50S ribosomal protein 6 [Source:Projected from Arabidopsis thaliana (AT5G17870) TAIR;Acc:AT5G17870]	167	31.6043	0.0092406	0.00407776	2	-1.26073	-0.201178	1.30158	-1.25354	1.29729	-1.83921	0.411426	-0.633904
Les.2817.2.S1_at; Solyc05g005160.3; nan	19	2.6852	2.79172e-05	0.00099051	1	-0.0641133	1.41962	0.500688	1.21434	-0.39829	-0.318318	-1.30665	-0.320977	1.03493	-1.74268	0.724466	-0.743005	Les.14.1.S1_at; Solyc03g006970.1; SBT2 protein [Source:UniProtKB/TrEMBL;Acc:P93205]	15	2.02631	0.00821883	0.00125882	1	-0.704517	0.908861	1.0061	1.04877	1.04348	-0.57901	-1.69201	-0.855706	0.435204	-1.13015	0.946849	-0.427872	Les.108.1.S1_at; Solyc06g064520.3; nan	0	0	0	0.000276651	24	0.561356	0.724129	-0.355213	0.972657	-0.944178	0.0223946	-0.3352	-1.94068
Les.2839.1.S1_at; Solyc04g071070.2; nan	0	0	0	0.000309119	50	0.655105	-0.696365	-1.04097	-1.17429	-0.824074	1.40804	0.63595	-0.190216	0.0567192	-0.880522	0.119763	1.93085	Les.2001.1.S1_at; nan; nan	0	0	0	0.000306435	41	-0.255281	-1.00706	-0.713353	-0.225023	0.854186	1.31482	-0.596504	-0.170886	-1.18358	1.41517	-0.931388	1.49889	LesAffx.69830.1.S1_at; Solyc02g064970.3; nan	0	0	0	0.000276651	53	0.350882	0.886064	-0.0161266	1.21104	0.934141	-0.185998	1.52146	0.209484
Les.2846.1.S1_at; nan; nan	78	14.6214	0.00328306	0.0042052	1	0.168847	-1.15205	-0.269825	-1.4233	-0.358648	0.184164	1.73769	0.887417	-0.699671	1.40401	-0.946669	0.46804	Les.1501.2.S1_at; Solyc02g080510.1; nan	38	5.22952	0.000636512	0.00235168	1	0.285904	-0.913909	-0.739346	-1.23892	-0.884238	1.09333	0.938482	0.723178	-0.872785	1.26624	-0.877031	1.21909	Les.1087.1.A1_at; Solyc04g072940.3; nan	24	4.48013	9.49185e-05	0.00134771	1	1.37565	1.11687	-1.29496	0.784086	-1.59472	-0.264327	-0.761068	1.47028
Les.2846.2.S1_at; Solyc07g007325.1; nan	83	15.3488	0.00257397	0.00434363	1	0.137628	-1.11143	-0.350721	-1.49955	-0.32903	0.207564	1.71917	0.944281	-0.58397	1.36582	-0.972455	0.472689	Les.1606.1.S1_at; Solyc04g010250.3; nan	28	4.29308	0.00643771	0.00180633	1	0.400499	-0.842233	-0.717898	-0.341481	-0.925771	0.880261	0.850653	0.627904	-1.37465	1.62319	-1.1409	0.960423	Les.109.1.S1_at; Solyc02g084720.3; Beta-galactosidase [Source:UniProtKB/TrEMBL;Acc:Q9LLS9]	171	31.485	0.00768282	0.00419792	1	-1.35942	-0.248945	0.710729	-0.777835	1.1654	-1.81411	0.889379	-0.90887
Les.2846.3.A1_at; nan; nan	46	8.5814	0.000898934	0.00267958	1	0.330639	-1.09579	-0.122712	-1.45753	-0.282009	0.148698	1.56012	0.990514	-0.913116	1.37481	-1.03083	0.497217	Les.1650.1.A1_at; Solyc10g081560.2; nan	18	2.72578	0.000441092	0.00181963	1	1.22291	-0.435185	-0.59268	-1.20377	-1.33264	1.2867	0.928492	0.778328	-0.818654	0.551449	-1.07761	0.692662	Les.1138.1.A1_at; nan; nan	129	20.9055	0.00592403	0.00295506	1	0.771331	0.587326	-0.804996	0.921989	-1.65323	1.45282	-1.30888	0.690268
Les.2852.1.S1_at; Solyc08g080650.2; nan	1	0.118787	0	0.00158177	6	-0.534821	-0.0857213	0.357407	-0.780396	-0.91207	-1.06164	0.718916	0.679494	1.01447	2.18098	-0.745532	-0.83109	Les.122.1.S1_at; Solyc02g082920.3; Acidic 26 kDa endochitinase [Source:UniProtKB/Swiss-Prot;Acc:Q05539]	2	0.223072	0	0.000653057	8	1.38553	-0.349288	-0.0338141	-1.12996	-1.14915	0.294052	1.42955	0.675196	0.0266946	1.08644	-1.33514	-0.900103	LesAffx.35954.1.S1_at; Solyc03g098060.2; nan	0	0	0	0.000276651	49	-0.982021	0.185188	-0.0575072	0.363645	-1.21488	-0.86734	-1.11157	0.262073
Les.2858.1.S1_at; Solyc06g074120.3; Bell-like homeodomain protein 2 [Source:UniProtKB/TrEMBL;Acc:Q7Y0Z7]	0	0	0	0.000309119	51	-1.50591	-0.0852153	0.519538	0.847966	1.47252	-1.05838	-0.482371	0.137591	-0.617525	1.46152	0.503855	-1.19359	Les.206.1.S1_at; Solyc01g107590.3; nan	0	0	0	0.000306435	42	0.538078	-1.03586	-1.12308	-0.422428	-0.106858	1.63768	0.941504	-0.678879	-0.956998	-0.690328	0.253974	1.64319	LesAffx.70064.1.S1_at; Solyc05g013530.3; nan	103	19.9529	0.000591845	0.00259189	1	0.867495	0.217424	-1.18719	0.764627	-0.902986	2.34693	-1.1197	0.250852
Les.2886.1.A1_at; Solyc02g036370.3; nan	0	0	0	0.000309119	52	-1.44853	-1.478	-0.873073	0.067086	-0.11457	-0.567514	1.26983	0.27681	-0.314152	1.60484	0.852464	0.724798	Les.2121.1.A1_at; Solyc06g068520.3; Hydroxyproline-rich systemin [Source:UniProtKB/Swiss-Prot;Acc:Q7XAD0]	0	0	0	0.000306435	43	-0.786829	-1.20531	-0.947487	0.792619	0.103542	0.66895	-0.0959575	-0.307617	-1.43396	1.87944	0.239903	1.09271	LesAffx.70212.1.S1_at; Solyc10g008480.3; nan	209	43.8357	0.00457842	0.00585638	1	1.24289	0.541581	-0.955293	1.19586	-1.13416	1.54425	-1.2307	0.750003
Les.2888.1.S1_at; Solyc04g009030.3; Glyceraldehyde-3-phosphate dehydrogenase [Source:UniProtKB/TrEMBL;Acc:K4BP59]	65	13.9828	0.00410383	0.00411533	3	-0.545526	0.35229	0.317943	1.29521	1.50793	0.283008	-1.51265	-1.53881	-0.505629	-0.821808	0.881058	0.286977	LesAffx.4981.1.S1_at; Solyc01g096450.3; nan	36	5.32764	0.0273309	0.00150523	2	-0.456826	0.832862	0.789557	0.777155	0.755553	-0.419249	-1.42721	-0.698013	1.05756	-1.8511	0.971725	-0.332013	Les.4777.1.S1_at; Solyc01g111570.3; nan	3	0.351148	0.00557786	0.00135862	3	-1.74781	-0.0841469	-0.911026	0.165994	0.126041	-0.34597	0.937932	-1.57532
Les.2915.1.A1_at; Solyc03g117675.1; nan	9	1.1191	0.000463426	0.000631775	1	-0.191175	-0.915703	0.172601	-1.00083	-0.732678	-0.442777	1.67537	0.936186	-0.422864	1.83549	-1.05352	0.139907	Les.1880.1.A1_at; Solyc11g012680.2; nan	34	4.38691	0.00766048	0.00188126	1	0.531212	-0.880212	-0.867462	-0.862299	-0.8214	0.52369	1.30594	0.929827	-0.98754	1.35171	-1.13659	0.913128	Les.1153.1.S1_at; Solyc04g016330.3; Glycerol-3-phosphate dehydrogenase [NAD(+)] [Source:UniProtKB/TrEMBL;Acc:K4BQD3]	98	14.4167	0.0149804	0.0026371	1	-1.20826	-0.426705	0.251633	-0.624955	0.961974	-1.1532	1.97371	-0.897385
Les.2925.1.A1_at; Solyc07g008880.3; nan	8	2.11258	0.000117252	0.00261925	17	1.09963	1.07035	1.01591	0.862606	0.724768	0.931639	-0.868	-0.813619	-1.08191	-0.920774	-0.99279	-1.02781	Les.3408.1.S1_at; nan; nan	2	0.264647	0	0.00111456	15	1.59507	-0.0738905	0.218605	-1.16959	-1.17954	-0.210659	1.65433	0.648271	0.361552	0.271217	-1.06473	-1.05065	LesAffx.54718.1.S1_at; Solyc05g056120.3; GATA transcription factor [Source:UniProtKB/TrEMBL;Acc:K4C2T6]	53	9.47767	0.00108319	0.00162115	1	-1.55544	0.060395	0.61115	-0.117622	0.937864	-1.08281	1.23245	-1.58975
Les.2933.1.S1_at; Solyc04g082630.3; Glyceraldehyde-3-phosphate dehydrogenase [Source:UniProtKB/TrEMBL;Acc:K4BVZ0]	48	9.93018	0.00188162	0.00296984	3	-0.273328	0.603803	0.512515	1.03991	1.35546	0.646232	-1.53904	-1.39853	-0.595503	-1.33159	0.610869	0.369193	LesAffx.5088.1.S1_at; Solyc01g088500.3; nan	18	2.25276	0.0147738	0.00125726	2	-0.771614	0.989295	0.75119	0.164965	0.820039	-0.511802	-1.19148	-0.997203	1.36736	-1.25059	1.27772	-0.647886	Les.479.1.S1_at; Solyc08g078910.2; nan	31	4.27811	0.000106085	0.000794969	1	-0.829676	-0.0578397	0.746656	-1.3988	0.721848	-0.716366	0.328049	-1.59681
Les.2959.1.S1_at; Solyc10g018300.2; nan	68	14.8403	0.00548294	0.00446114	3	-0.286861	0.344605	0.340272	1.2243	1.38076	0.469822	-1.44747	-1.35383	-0.762928	-1.25206	0.867877	0.475502	LesAffx.51386.1.A1_at; Solyc09g009860.1; nan	37	14.9791	0	0.00272891	2	-0.0973444	0.803047	0.890263	0.171213	0.650448	-0.0910893	-1.31385	-1.05016	1.23347	-2.00646	0.845444	-0.0349875	Les.4791.1.S1_at; Solyc06g005710.3; nan	100	18.8449	0.0062032	0.00302497	3	-1.4211	-0.881137	-0.242164	-0.852701	1.0574	-1.06493	1.34817	-0.511724
Les.2971.1.S1_at; Solyc09g083440.3; nan	0	0	0	0.000309119	53	-1.64092	-1.52824	-0.247893	-0.245391	-0.381789	1.03539	-0.297583	-0.402286	0.182674	0.84178	1.47895	1.2053	Les.2164.1.A1_at; Solyc12g096900.2; nan	0	0	0	0.000306435	44	0.506667	0.580373	0.477318	1.39994	1.13967	-1.59319	0.171047	-0.769983	-0.103493	-0.94365	0.682226	-1.54691	LesAffx.70492.1.S1_at; Solyc03g044097.1; nan	0	0	0	0.000276651	54	1.44914	0.229519	2.03702	0.28722	0.871103	0.149489	-0.996826	-0.042127
Les.3016.1.S1_at; Solyc07g063600.3; Chlorophyll a-b binding protein, chloroplastic [Source:UniProtKB/TrEMBL;Acc:K4CH43]	36	7.59379	0.000111669	0.0022652	3	-0.0978254	0.714533	0.653123	0.986108	1.50542	0.283183	-1.72658	-1.38516	-0.733914	-0.984468	0.488434	0.297148	LesAffx.53426.1.S1_at; Solyc02g092950.3; EB1C [Source:Projected from Arabidopsis thaliana (AT5G67270) UniProtKB/TrEMBL;Acc:A0A178UNG3]	43	17.88	2.23338e-05	0.00329543	2	-0.0523256	0.858243	0.838613	0.239166	0.661421	-0.323726	-1.24485	-0.976973	1.4086	-1.90738	0.844138	-0.344921	Les.4803.1.S1_at; Solyc02g089630.3; Proline dehydrogenase [Source:UniProtKB/TrEMBL;Acc:K4BCB4]	2	0.472536	0	0.00138926	15	0.819722	0.468949	-0.920296	0.839161	0.0486502	-0.102356	2.24747	0.775713
Les.3017.2.S1_at; Solyc12g044330.2; nan	26	4.15334	0.00300389	0.00161121	3	-0.978357	-0.0552255	0.26112	1.15073	1.57255	0.718667	-1.22397	-1.4436	-0.77331	-0.540497	1.05922	0.252674	LesAffx.60610.1.S1_at; Solyc11g065190.2; nan	41	14.3658	0	0.00267885	2	0.0640699	0.918634	0.965494	0.283785	0.652289	-0.385028	-1.18976	-0.877211	1.19517	-1.98293	0.869447	-0.513961	Les.4825.1.S1_at; Solyc10g085225.1; nan	44	7.61227	0.000452259	0.00118287	2	-0.741639	0.520583	1.42897	-0.379161	1.05511	-2.43748	-0.919713	-0.44395
Les.3030.1.A1_at; Solyc02g082120.3; nan	4	0.450025	2.23338e-05	0.000422876	2	0.517407	-1.04443	-0.0560534	-1.38924	-0.692903	1.17615	1.36332	0.371072	-1.20147	0.368821	-0.730175	1.3175	Les.4483.1.S1_at; nan; nan	33	4.91253	0.000547177	0.00257912	1	0.740803	-0.613818	-0.549111	-1.13436	-1.35145	1.34053	1.12868	0.254663	-0.437738	0.602874	-1.20887	1.22779	Les.2353.1.A1_at; Solyc10g079910.2; nan	31	5.36824	0.004316	0.00248147	1	1.31037	0.892084	-1.14746	0.503612	-1.24418	-0.425651	-1.48738	1.26574
Les.3042.2.S1_at; Solyc04g074990.3; nan	40	5.52427	0.00179228	0.00162415	2	-0.07617	0.956121	0.455097	1.23945	0.425519	0.285184	-2.0465	-1.15199	0.547689	-1.0119	0.951603	-0.574099	Les.4529.1.S1_at; Solyc02g091920.3; Xyloglucan endotransglucosylase/hydrolase [Source:UniProtKB/TrEMBL;Acc:K4BCZ0]	3	0.377661	0	0.000618393	1	-0.512248	0.528224	0.414842	1.2897	1.55812	-1.41	-0.627023	-0.629202	-0.0137721	-0.446399	1.19021	-1.34245	Les.2403.2.S1_at; nan; nan	2	0.463126	0	0.000895487	14	0.243004	-0.221442	-0.347157	0.895389	0.0811307	1.86703	1.94369	-0.780543
Les.3052.1.S1_at; Solyc06g071960.3; nan	117	20.9333	0.0130541	0.00555685	2	-0.274494	1.01309	0.324992	1.47961	0.962744	-0.243278	-1.83126	-0.943659	0.337239	-1.21431	0.790181	-0.400856	Les.4530.1.S1_at; nan; nan	22	2.97509	8.37516e-05	0.00139198	1	-0.810439	0.880825	0.628762	0.635086	0.960311	-0.90963	-0.79735	-0.832011	0.732478	-1.49872	1.60024	-0.589549	Les.2423.1.A1_at; nan; nan	43	13.1906	0.00125627	0.00207334	2	-1.33258	-0.566719	1.69841	-0.581918	1.38244	-1.51174	-0.979589	0.784918
Les.3052.2.S1_at; Solyc06g071960.3; nan	101	16.7139	0.0236626	0.00456609	2	-0.302463	0.969956	0.251944	1.49138	0.924449	-0.268917	-1.85712	-0.880936	0.318006	-1.29045	0.848522	-0.204372	Les.4583.1.S1_at; Solyc07g006220.2; nan	9	1.4358	5.0251e-05	0.00117454	1	-0.702391	0.708441	0.824696	1.15143	1.08045	-1.50039	-1.40625	-0.126996	0.454921	0.0892355	0.764021	-1.33716	Les.2457.1.A1_at; Solyc01g111145.1; nan	16	2.34468	0.000625345	0.000978738	3	-1.29468	-0.49026	-0.566919	-0.350702	0.401548	-0.284488	2.00534	-0.940788
Les.3054.1.S1_at; Solyc12g011450.2; Chlorophyll a-b binding protein 13, chloroplastic [Source:UniProtKB/Swiss-Prot;Acc:P27489]	1	0.15196	0	0.000510246	3	-1.27861	0.116111	0.264583	1.07563	1.6059	0.0167919	-0.937577	-1.64781	-0.826032	0.482925	1.01088	0.117212	LesAffx.60610.2.S1_at; Solyc11g065190.2; nan	41	14.1437	0.00185929	0.00263876	2	0.0854887	0.911705	0.95776	0.280686	0.677362	-0.373191	-1.1977	-0.873453	1.15636	-1.99954	0.88169	-0.507173	Les.4867.1.S1_at; Solyc02g080540.1; ATP synthase gamma chain 1, chloroplastic [Source:Projected from Arabidopsis thaliana (AT4G04640) UniProtKB/Swiss-Prot;Acc:Q01908]	80	15.1049	0.00183137	0.00235299	3	-1.92318	-0.735714	-0.102386	-1.10359	0.815074	-0.993343	1.33481	0.0158171
Les.3055.1.S1_at; Solyc04g078470.3; CycD3;3 protein [Source:UniProtKB/TrEMBL;Acc:Q9SMD4]	0	0	0	0.000309119	54	1.21579	0.562694	0.270746	-0.0575767	-0.655115	1.27169	-0.88879	-0.902498	0.131596	-2.06197	0.0140927	1.09934	Les.224.1.S1_at; Solyc04g014510.3; Glutamine synthetase [Source:UniProtKB/TrEMBL;Acc:K4BPV5]	0	0	0	0.000306435	45	1.36843	-0.318976	-0.0819817	-1.55854	-1.37627	1.19109	0.629664	0.150142	-0.132044	0.269574	-1.24484	1.10376	LesAffx.70732.1.S1_at; Solyc03g044900.3; Probable calcium-binding protein CML41 [Source:Projected from Arabidopsis thaliana (AT3G50770) UniProtKB/Swiss-Prot;Acc:Q8L3R2]	10	1.12651	0.00729756	0.000806751	1	1.49419	0.73498	-0.315219	0.598564	-1.16551	0.231747	-2.45981	0.114829
Les.3065.1.S1_at; Solyc10g009080.3; Squamosa promoter-binding-like protein [Source:UniProtKB/TrEMBL;Acc:K4CY84]	8	1.35941	0.00189837	0.00103333	3	-0.287854	-0.0223396	0.242051	0.444451	1.16521	1.19168	-1.7231	-1.11488	-0.462563	-1.30446	0.976162	0.895649	LesAffx.65941.1.S1_at; Solyc08g078640.2; nan	36	11.8393	2.79172e-05	0.00220838	2	0.0443105	0.763516	0.949196	0.243219	0.63597	0.0843934	-1.29792	-1.48639	1.12078	-1.74943	0.890727	-0.198375	Les.4868.1.S1_at; Solyc09g011080.3; nan	0	0	0	0.000276651	42	-0.257038	0.853883	-0.4905	1.22591	0.334233	0.0865255	0.473014	-2.27899
Les.3065.2.A1_at; Solyc10g009080.3; Squamosa promoter-binding-like protein [Source:UniProtKB/TrEMBL;Acc:K4CY84]	8	1.36146	0	0.00103877	3	-0.143139	0.0873473	0.272323	0.441122	1.14925	1.11371	-1.72582	-1.01673	-0.623702	-1.41241	1.02834	0.829719	LesAffx.66157.1.S1_at; Solyc05g014370.3; Mitotic spindle checkpoint protein MAD2 [Source:Projected from Arabidopsis thaliana (AT3G25980) UniProtKB/Swiss-Prot;Acc:Q9LU93]	38	10.1956	0.00667221	0.00203	2	-0.185326	0.833632	1.02438	0.0194979	0.605559	-0.505338	-1.03537	-0.843933	1.539	-1.74459	0.970807	-0.678313	Les.4876.1.S1_at; Solyc11g069700.2; Elongation factor 1-alpha [Source:UniProtKB/TrEMBL;Acc:K4DAC6]	12	1.6897	6.70013e-05	0.000491385	1	1.76499	0.241747	-0.549656	0.689708	-0.791452	1.18672	-2.25787	0.350478
Les.3070.1.S1_at; Solyc06g062370.3; nan	1	0.353461	0	0.000445883	4	-0.0986982	0.925445	0.862929	1.15803	-1.11488	0.686476	-1.2208	-1.36198	0.903648	-1.3962	0.389056	0.266972	LesAffx.53706.1.S1_at; Solyc04g074310.3; nan	22	3.29933	0.00386933	0.00199219	3	-0.811501	0.725901	0.643989	0.778204	1.10964	-0.145663	-1.0945	-0.827048	0.400307	-1.99435	1.23359	-0.0185641	LesAffx.20929.1.S1_at; Solyc10g080220.2; nan	4	0.507941	0.00279172	0.00100162	2	-0.0653218	0.0266848	-1.34151	0.516519	-0.946334	1.07198	2.08827	-1.30782
Les.3070.2.A1_at; Solyc06g062370.3; nan	16	2.83856	0.00216638	0.00129214	4	0.223879	0.814641	0.854761	0.964528	-1.00581	0.650613	-1.65193	-1.1737	0.841737	-1.40604	0.492515	0.394805	LesAffx.56104.1.S1_at; Solyc12g006230.2; nan	12	1.62744	0.00248463	0.00128796	3	0.348999	-0.363132	-0.385562	-0.785019	-1.15115	0.295688	0.752357	1.37465	-0.401108	1.82812	-1.6126	0.0987554	LesAffx.22491.2.A1_at; Solyc12g042480.2; nan	86	13.0561	0.010536	0.00298712	1	1.48911	0.878173	-0.687226	0.515711	-1.31737	0.512837	-1.47765	1.11382
Les.3071.1.S1_at; Solyc07g017610.3; nan	29	5.0597	0.00139586	0.0016929	1	0.0883418	-1.07042	0.011938	-1.27395	-0.405258	-0.115443	1.67465	0.906845	-0.732381	1.74283	-0.915065	0.087915	Les.1988.1.A1_at; nan; nan	28	3.52824	0.00208262	0.00222913	1	1.0114	-0.561831	-0.71162	-1.14298	-1.21296	1.11832	0.960814	0.852675	-0.887618	0.935786	-1.11572	0.753736	Les.1189.1.A1_at; Solyc10g078360.2; nan	0	0	0	0.000276651	25	-0.865034	0.901423	1.17012	-0.606168	0.00884929	-1.13478	-1.26679	1.93939
Les.3073.1.S1_at; Solyc06g060340.3; Photosystem II 22 kDa protein, chloroplastic [Source:UniProtKB/Swiss-Prot;Acc:P54773]	70	12.0192	0.00365157	0.00365604	3	-0.736102	0.546496	0.186948	1.23499	1.32639	0.295213	-1.43942	-1.28625	-0.214129	-1.33426	1.01995	0.400164	LesAffx.66847.1.S1_at; Solyc09g072800.3; nan	43	18.1786	0.000318256	0.00334432	2	-0.0780005	0.870051	0.950949	0.254219	0.676325	-0.180735	-1.42461	-1.13183	1.20835	-1.76846	0.897241	-0.273507	Les.4895.1.S1_at; Solyc11g006720.2; nan	132	22.8847	0.00735339	0.00300068	1	0.703264	0.238214	-1.35095	1.14152	-1.51623	2.0308	-0.495459	0.271128
Les.309.1.A1_at; Solyc02g067100.3; nan	25	10.9612	0	0.0031585	4	0.53769	1.29674	0.622185	0.849674	-0.335404	0.146943	-1.90419	-1.03776	0.843693	-1.44139	0.531013	-0.109203	LesAffx.56785.1.S1_at; Solyc01g080680.3; nan	13	1.63432	0.00180904	0.00129884	3	-0.693014	0.730455	0.505697	1.18351	1.42869	-0.858344	-0.843027	-0.899023	0.0818452	-1.08104	1.39662	-0.952371	LesAffx.22735.1.A1_at; Solyc02g077240.3; nan	42	6.03069	0.000228921	0.00107303	3	-0.258442	-0.821283	-0.629434	-1.07217	0.940542	-1.35555	1.51702	-0.794814
Les.3098.1.S1_at; Solyc12g094620.2; nan	2	0.318162	0	0.00128742	23	0.223806	-1.27887	-0.282856	-1.27291	0.427009	0.971981	1.4161	0.211802	-1.25387	0.937547	-1.04502	0.945283	Les.1511.1.A1_at; Solyc08g077510.3; nan	3	1.00584	0	0.00269933	20	0.322971	0.857515	0.758484	1.26333	1.03749	-1.41742	-0.556957	-0.674083	0.143388	-0.481541	0.618671	-1.87185	LesAffx.62349.1.S1_at; Solyc01g096420.3; nan	7	1.01643	1.11669e-05	0.000415758	1	0.444939	-1.06334	1.05706	-0.98515	1.39543	-0.567045	1.57464	-1.01653
Les.3113.1.S1_at; Solyc06g005750.3; nan	17	2.46313	2.23338e-05	0.000938151	1	-0.306947	1.09753	0.256004	1.28915	-0.10183	-0.88544	-1.77631	-0.24319	0.820932	-1.31195	1.24986	-0.087802	Les.2063.1.A1_at; Solyc11g011980.2; nan	22	2.9534	0.000402008	0.00143107	1	-0.757567	0.902575	0.312902	0.966212	0.867787	-1.10078	-0.862023	-0.477707	1.07987	-1.39081	1.33382	-0.874281	Les.12.1.S1_at; Solyc06g068160.3; SNF4 [Source:UniProtKB/TrEMBL;Acc:Q9M727]	3	0.343004	0.00053601	0.000583785	2	-1.1507	-0.505728	-0.945119	0.974819	-0.871137	2.19935	0.300661	-0.967294
Les.3119.1.A1_at; Solyc06g073260.3; chloroplast RNA binding [Source:Projected from Arabidopsis thaliana (AT1G09340) TAIR;Acc:AT1G09340]	17	2.58277	0.000145169	0.0013668	3	-0.787707	-0.0319241	-0.223767	1.06188	1.69147	0.574506	-0.880466	-1.21338	-0.986128	-1.03819	1.04073	0.792977	LesAffx.68676.1.S1_at; Solyc02g093720.3; nan	26	4.29848	0.0049246	0.00107385	2	-0.429597	0.652745	0.682317	-0.0380968	0.661339	-0.731782	-1.14129	-1.01846	1.75957	-1.34504	1.26624	-0.317958	Les.4922.1.S1_at; Solyc11g010625.1; nan	118	20.2764	0.00109435	0.00264664	1	0.455826	1.06481	-1.23146	1.29565	-1.39675	1.67278	-0.777898	0.890289
Les.3119.3.S1_at; Solyc06g073260.3; chloroplast RNA binding [Source:Projected from Arabidopsis thaliana (AT1G09340) TAIR;Acc:AT1G09340]	10	1.67772	0.00019542	0.00105778	3	-0.916519	-0.232586	-0.323248	1.03809	1.69991	0.583717	-0.729828	-1.08223	-0.985389	-1.03023	1.00055	0.977749	LesAffx.69541.1.S1_at; Solyc07g063550.3; nan	45	11.8024	0.00560578	0.0025735	2	-0.32858	0.835185	0.975479	0.260706	0.684351	-0.485669	-1.46767	-1.06747	1.42608	-1.40253	0.997063	-0.42693	Les.4923.1.S1_at; Solyc10g005080.3; nan	5	1.0954	0	0.000614267	2	0.58893	1.55239	-0.13366	1.97348	-0.458093	1.03577	-0.572749	-0.994351
Les.3127.1.S1_at; Solyc02g091560.3; Serine hydroxymethyltransferase [Source:UniProtKB/TrEMBL;Acc:K4BCV4]	68	15.3474	0.000508093	0.00460725	3	-0.53929	0.280788	0.259202	1.22675	1.6841	0.370897	-1.44	-1.25004	-0.710833	-1.01225	0.938907	0.191773	C00007543.4.Hydroxysphinganine.	23	3.19478	0.0112171	0.00134698	2	-0.478743	1.0586	0.850705	0.114796	0.884908	-0.783365	-1.19619	-0.74836	1.40971	-1.34295	1.03962	-0.808727	Les.4933.1.S1_at; Solyc06g074620.3; nan	69	15.8042	0.0441315	0.00265075	2	0.577491	0.277603	-1.42809	1.00209	-1.46338	1.99979	0.92884	-0.234578
Les.3127.2.S1_at; Solyc02g091560.3; Serine hydroxymethyltransferase [Source:UniProtKB/TrEMBL;Acc:K4BCV4]	61	11.4168	0.000965935	0.00351247	3	-0.66806	0.217362	0.213086	1.20843	1.79676	0.352019	-1.379	-1.14835	-0.666828	-0.987094	1.00282	0.0588467	Toma80.Unidentified.glycoalkaloid..UGA..9.	1	0.108296	0	0.00034757	2	-0.176509	1.15875	1.14564	0.46039	0.687333	-0.537264	-1.70672	-1.08338	0.842438	-0.648575	0.956947	-1.09905	Les.4934.1.S1_at; Solyc05g014120.1; nan	85	14.6985	0.0150976	0.00247818	2	0.361532	0.666704	-1.27726	1.26463	-1.08924	2.3301	0.357012	-0.367004
Les.3127.3.S1_at; Solyc02g091560.3; Serine hydroxymethyltransferase [Source:UniProtKB/TrEMBL;Acc:K4BCV4]	40	7.24673	0.000256838	0.00228165	3	-0.563836	0.287507	0.264889	1.25844	1.78153	0.41237	-1.27059	-1.10815	-0.959855	-0.926742	0.977582	-0.153134	Glucuronic.acid..D...1MEOX...5TMS.	30	5.83611	0.000234505	0.0012311	2	-0.0773589	0.812133	1.06979	0.447915	0.896747	0.319392	-1.33274	-1.17546	0.68975	-2.02882	0.551106	-0.17246	Les.4957.1.S1_at; Solyc09g007940.3; nan	86	16.1618	0.00164153	0.00213679	1	-0.717639	0.130477	1.36026	-0.897641	1.162	-2.29471	0.221811	-0.690915
Les.3140.2.S1_at; Solyc09g061840.3; nan	12	2.00663	0.000145169	0.00108242	2	0.388827	-1.01513	-0.933705	-1.38808	-0.653795	1.31799	1.87682	0.0708015	-0.117079	-0.134542	-0.455425	1.04331	Les.4604.1.S1_at; Solyc09g074560.3; nan	14	1.74256	0.000212171	0.00117683	1	1.12641	-0.620637	-0.575164	-0.941714	-1.52083	1.07264	1.08682	0.409522	-0.414126	0.827631	-1.3111	0.860548	Les.2460.1.S1_at; Solyc10g009150.3; nan	1	0.626693	0	0.00184434	21	1.12589	-0.125641	-0.992908	-0.785996	0.20269	-2.17415	-0.885416	0.725855
Les.3157.1.S1_at; Solyc03g097870.3; nan	12	1.76962	0.000111669	0.000820395	3	-0.141664	-0.243317	0.33954	-1.30064	-0.922138	-0.430029	1.53723	1.32123	-0.207887	1.59699	-1.07129	-0.478028	Les.1211.1.A1_at; Solyc01g107070.3; nan	15	2.23738	0.000480176	0.00129252	3	0.937655	-0.409581	-0.582246	-0.741064	-1.19708	0.520579	1.34615	1.15115	-0.890691	1.25233	-1.36432	-0.0228858	Les.4988.1.S1_at; Solyc04g074740.3; nan	27	3.46168	0.00110552	0.000774906	1	-0.379922	-1.07871	0.171942	-1.443	0.99911	-1.69049	1.57918	1.15262
Les.3164.1.A1_at; Solyc06g071820.3; nan	2	0.603862	0	0.00157827	1	1.24885	-0.540298	0.322593	-1.65566	-0.0802194	0.444902	0.76422	1.26433	-1.23283	0.845061	-1.2941	-0.0868441	Les.207.1.S1_at; Solyc01g079880.3; nan	20	2.57114	0.00953094	0.00167329	1	0.953439	-0.721787	-0.702228	-0.870589	-0.933101	0.842878	1.14294	0.932581	-1.18124	0.990118	-1.24717	0.794161	Les.1205.1.A1_at; nan; nan	41	5.58296	0.00234505	0.00106726	1	-0.610097	-0.52187	1.26849	0.0505143	1.68344	-0.949468	0.894068	-1.3165
Les.3164.2.S1_at; Solyc06g071820.3; nan	2	0.608192	0	0.00158681	1	1.27111	-0.649559	0.208315	-1.66136	-0.0774039	0.49949	0.773868	1.20237	-0.882463	0.909855	-1.49763	-0.0965985	Les.22.1.S1_at; Solyc10g086220.2; 12-oxophytodienoate reductase 1 [Source:UniProtKB/Swiss-Prot;Acc:Q9XG54]	49	6.49573	0.0132383	0.00314124	1	0.699327	-0.584556	-0.618535	-0.988721	-1.29904	0.670986	1.04011	0.962744	-0.784839	1.31946	-1.26174	0.844802	Les.1211.1.A1_at; Solyc01g107070.3; nan	149	24.332	0.0267168	0.00317428	2	1.25353	0.976603	-1.3401	1.42113	-1.40047	1.46233	-0.548741	0.282115
Les.3174.1.S1_at; Solyc02g062340.3; Fructose-bisphosphate aldolase [Source:UniProtKB/TrEMBL;Acc:K4B6C3]	29	4.86593	0.00319931	0.00194978	3	-0.47935	-0.118785	0.133162	0.857824	1.64016	0.745971	-1.36284	-1.47468	-0.726856	-0.889998	0.841805	0.833588	Les.1213.1.A1_at; Solyc06g068540.3; nan	38	5.12058	0.00844216	0.0026207	3	0.489811	-0.463208	-0.427653	-1.27639	-1.30626	0.619921	0.932994	1.08354	-0.370306	1.5046	-1.36503	0.57798	Les.5038.1.S1_at; Solyc12g009000.1; nan	1	0.101749	0	0.000296438	1	-0.938261	-0.975221	0.735015	-0.624117	1.08926	0.0680167	1.49163	-0.924217
Les.3180.1.S1_at; Solyc03g114450.3; Calcium sensing receptor, chloroplastic [Source:Projected from Arabidopsis thaliana (AT5G23060) UniProtKB/Swiss-Prot;Acc:Q9FN48]	41	6.66997	0.000279172	0.00218616	3	-0.877968	0.116243	0.0237806	1.42583	1.65395	0.18958	-1.1645	-1.10687	-0.320832	-1.27044	1.00204	0.329185	Les.1492.1.S1_at; Solyc12g036170.2; Photosynthetic NDH subunit of subcomplex B 4, chloroplastic [Source:Projected from Arabidopsis thaliana (AT1G18730) UniProtKB/Swiss-Prot;Acc:Q8RXS1]	28	4.52247	0.00333331	0.0023561	3	-0.748205	0.441731	0.234945	1.56619	1.17402	0.188393	-1.31067	-1.07758	-0.22635	-1.48276	1.08116	0.159126	Les.5054.1.S1_at; Solyc08g078910.2; nan	39	5.41029	0.00632046	0.00104405	1	-0.881797	-0.740132	1.91918	-0.811595	1.9756	-0.712585	0.0861297	-0.772973
Les.3180.2.S1_at; Solyc03g114450.3; Calcium sensing receptor, chloroplastic [Source:Projected from Arabidopsis thaliana (AT5G23060) UniProtKB/Swiss-Prot;Acc:Q9FN48]	39	6.07989	0.000938018	0.00208435	3	-0.895806	0.0669577	0.110655	1.4002	1.56403	0.183772	-1.00386	-1.0079	-0.81199	-1.23548	1.13366	0.49576	Les.1492.2.A1_at; Solyc12g036170.2; Photosynthetic NDH subunit of subcomplex B 4, chloroplastic [Source:Projected from Arabidopsis thaliana (AT1G18730) UniProtKB/Swiss-Prot;Acc:Q8RXS1]	25	3.92467	0.00212171	0.00206556	3	-0.591387	0.581598	0.355573	1.48863	1.09919	0.270729	-1.39511	-1.06411	-0.33926	-1.53424	1.06608	0.0623127	Les.506.1.A1_at; Solyc07g007260.3; nan	13	1.70326	0.000201004	0.00064627	4	-0.00826619	0.0848819	0.388524	-0.879836	0.92701	-2.60915	1.14422	0.673402
Les.3186.1.S1_at; Solyc07g054310.2; nan	1	0.448452	0	0.00206079	26	-0.214449	-0.695807	-0.916647	0.656188	1.65327	-1.02066	0.59641	1.49091	-1.50069	0.0649068	0.483082	-0.59651	Les.1997.1.S1_at; Solyc04g048900.3; nan	2	0.787589	0	0.00226374	22	1.65165	-0.963182	-0.468123	-1.2049	-0.735099	0.371015	1.97583	-0.0263147	-0.103867	-0.0830618	-0.909619	0.495678	LesAffx.64171.1.S1_at; Solyc02g092550.3; nan	68	10.8755	0.000831933	0.00161461	1	0.295816	1.45545	-0.175409	1.35086	-0.877833	1.42925	-1.10944	0.0502553
Les.3186.3.A1_at; Solyc07g054310.2; nan	1	0.448452	0	0.00206079	26	0.052689	-0.92189	-1.06013	0.390449	1.58352	-1.01482	0.731023	1.5966	-1.31868	0.25511	0.301915	-0.595785	Les.1997.3.A1_at; Solyc04g048900.3; nan	2	0.826151	0	0.00236806	22	1.72044	-0.90788	-0.578565	-1.14178	-0.699926	0.502714	1.89607	-0.00034515	-0.175172	0.0275577	-1.02919	0.386071	LesAffx.64171.2.S1_at; Solyc02g092550.3; nan	76	11.993	0.000396424	0.00174881	1	0.371773	1.44178	-0.259142	1.41989	-0.852222	1.4864	-1.22422	0.0221589
Les.3193.1.S1_at; Solyc12g044240.2; nan	0	0	0	0.000309119	55	-0.955123	-1.0976	0.166995	-0.88285	0.861532	-0.671854	1.05553	1.22896	-1.08441	1.72534	-0.322904	-0.0236217	Les.2256.1.S1_at; Solyc03g111730.3; nan	0	0	0	0.000306435	46	-1.32835	0.51643	0.110232	-0.255034	0.819771	-1.16045	-1.01407	-0.742905	0.506572	0.86445	2.04	-0.356638	LesAffx.70738.1.A1_at; nan; nan	81	12.5154	0.00538244	0.00271876	1	1.18423	0.913779	-1.26639	0.942138	-1.22859	0.374498	-1.3291	1.27453
Les.3198.1.S1_at; Solyc07g052510.3; nan	28	4.53436	6.70013e-05	0.00137718	2	0.801024	1.33279	0.452864	1.25735	0.380112	-0.0577456	-1.79888	-0.775868	0.276428	-1.33959	0.368097	-0.896571	Les.4681.1.S1_at; Solyc01g074040.2; nan	19	2.91379	2.79172e-05	0.00151581	1	-0.466949	0.773788	0.74955	1.11593	1.03983	-1.5757	-0.832837	0.0566026	0.433384	-0.704419	0.98166	-1.57083	Les.2460.2.S1_at; Solyc10g009150.3; nan	1	0.626693	0	0.00184434	21	1.30644	-0.214559	-1.01254	-0.952841	0.0859857	-1.77183	-0.969515	0.770041
Les.3205.1.S1_at; Solyc12g099200.2; nan	0	0	0	0.000309119	56	-0.652103	-0.290684	0.172896	-0.0942512	0.850261	-1.35697	0.24838	1.02576	-0.966098	2.05862	0.245811	-1.24162	Les.228.1.S1_at; Solyc12g009650.2; nan	0	0	0	0.000306435	47	-0.634189	0.26103	0.101029	0.00695515	0.31457	1.32052	-0.779566	-0.864042	0.336235	-2.16521	0.657252	1.44542	LesAffx.70768.1.S1_at; Solyc04g007000.1; RAV1 [Source:UniProtKB/TrEMBL;Acc:E1U2K4]	10	1.2371	0.00938577	0.000872524	4	-0.307091	0.504574	-0.639626	1.25279	-1.40476	1.6391	-1.08682	-0.834896
Les.3210.1.S1_at; Solyc07g006570.3; nan	16	2.18711	0.000865433	0.000981508	2	-0.688748	0.677225	0.728363	1.54162	0.413999	-1.10128	-1.78221	-0.365551	0.576124	0.113268	0.971855	-1.08467	Les.4710.1.S1_at; Solyc12g040790.2; nan	25	4.06817	0.000753765	0.00165146	1	0.283671	0.818069	1.00212	0.883069	0.846905	-0.772425	-1.09534	-0.90853	0.680565	-1.81642	0.864246	-0.78593	Les.2461.1.S1_at; Solyc01g108700.3; nan	0	0	0	0.000276651	31	-0.677932	1.35649	-1.65442	0.383092	-0.746741	-0.00829911	-1.55613	-0.720066
Les.3214.1.S1_at; Solyc01g097340.3; GDP-mannose 3',5'-epimerase [Source:UniProtKB/TrEMBL;Acc:C6K2K9]	62	9.39609	0.00747065	0.00303351	3	-0.712858	0.559981	0.289351	1.51108	1.24187	-0.0970789	-1.64186	-1.10304	0.0454271	-1.15108	1.00876	0.0494572	Les.1602.1.S1_at; Solyc10g079950.2; nan	52	8.30709	0.0105248	0.00405942	3	0.620126	-0.520229	-0.653226	-1.05281	-1.14888	0.432111	1.1031	1.16861	-0.726178	1.65887	-1.16631	0.284812	Les.5075.1.S1_at; Solyc07g065500.2; Nuclear transcription factor Y subunit B-2 [Source:Projected from Arabidopsis thaliana (AT5G47640) UniProtKB/Swiss-Prot;Acc:Q9FGJ3]	1	0.230275	0	0.000641064	3	-1.04594	-1.47813	-0.794743	-1.14878	0.532982	1.0092	1.83744	-0.0489144
Les.3214.2.S1_at; Solyc01g097340.3; GDP-mannose 3',5'-epimerase [Source:UniProtKB/TrEMBL;Acc:C6K2K9]	63	9.72187	0.00410383	0.00309039	3	-0.692788	0.613277	0.273396	1.46206	1.33453	-0.100268	-1.60493	-1.06299	0.159922	-1.18796	0.983127	-0.177375	Les.1603.1.A1_at; Solyc12g011280.2; Chlorophyll a-b binding protein, chloroplastic [Source:UniProtKB/TrEMBL;Acc:K4DCL4]	31	5.70094	0.000307089	0.00278618	3	-1.13639	0.522894	0.507701	1.26068	1.23735	0.0559427	-1.28898	-1.22704	-0.473476	-1.07187	1.13266	0.480525	Les.5082.1.S1_at; Solyc03g096870.3; nan	84	26.6388	0.00017867	0.00361484	2	-1.12764	-0.431558	1.82572	-1.2534	1.4557	-1.57006	-0.479223	-0.0287499
Les.3217.2.S1_at; Solyc02g085950.3; Ribulose bisphosphate carboxylase small chain 3B, chloroplastic [Source:UniProtKB/Swiss-Prot;Acc:P05349]	29	4.72263	0.000150753	0.00161367	3	-0.389965	0.483355	0.1026	1.50706	1.8912	-0.000578319	-1.11299	-1.04289	-0.906041	-1.00292	0.731456	-0.260284	Les.1721.1.A1_at; Solyc11g066950.2; nan	14	2.2444	5.58344e-06	0.00121135	3	-0.237662	0.742308	0.641468	0.891891	0.90734	-0.169842	-1.20514	-1.10857	0.701603	-2.08486	0.901591	0.0198706	Les.5091.1.S1_at; Solyc09g090130.3; nan	58	8.26992	0.00899492	0.00172173	1	1.39625	1.13006	-0.24818	0.575388	-1.03697	0.410235	-1.1609	1.05133
Les.3225.2.S1_at; Solyc02g036350.3; 1-aminocyclopropane-1-carboxylate oxidase [Source:UniProtKB/TrEMBL;Acc:A4ZYQ6]	1	0.832435	0	0.00206079	32	-0.0527933	0.00125463	0.924553	-0.42923	-0.967366	-0.77621	1.16378	1.04898	0.28982	1.45604	-1.66584	-0.992999	LesAffx.23467.1.S1_at; Solyc07g005895.1; nan	3	0.742946	1.67503e-05	0.00123712	25	-1.40544	0.381679	0.332168	1.40072	1.42331	-0.84532	-1.48995	-0.180717	-0.558821	0.665095	0.853007	-0.575733	LesAffx.66226.1.S1_at; Solyc03g118780.3; nan	61	12.7596	0.00297039	0.0018369	2	-1.39285	-0.0483863	1.00842	-1.08856	0.836328	-2.18656	-0.236488	-0.0686535
Les.3225.3.S1_at; Solyc02g036350.3; 1-aminocyclopropane-1-carboxylate oxidase [Source:UniProtKB/TrEMBL;Acc:A4ZYQ6]	1	0.832435	0	0.00206079	32	-0.0621225	-0.0325539	1.001	-0.450672	-0.880567	-0.67163	1.08124	1.14925	0.221712	1.39587	-1.7569	-0.99463	Les.1401.1.S1_at; Solyc01g067660.3; Beta-amylase [Source:UniProtKB/TrEMBL;Acc:Q5NE19]	1	0.743073	0	0.0020429	26	-0.236654	-1.05522	-0.890383	-0.160246	0.13793	0.640218	0.841983	0.585826	-1.74906	1.60314	-0.823621	1.10608	LesAffx.66226.2.S1_at; Solyc03g118780.3; nan	57	11.5057	0.000429925	0.0016775	2	-1.42793	-0.00672849	0.902885	-1.11186	0.80146	-2.19224	-0.19809	-0.0239842
Les.324.1.S1_at; Solyc02g069460.3; nan	60	13.5401	0.000452259	0.00396345	3	-0.21354	0.416256	0.372125	1.15598	1.40607	0.417564	-1.59962	-1.52614	-0.605612	-1.05303	0.747328	0.482633	Les.1721.2.S1_at; Solyc11g066950.2; nan	22	3.63606	0.000463426	0.00181501	3	-0.329573	0.677204	0.682105	1.03318	0.95314	-0.216593	-1.17999	-1.1295	0.657789	-2.00753	0.901088	-0.0413324	Les.5112.1.S1_at; Solyc03g013340.3; Nodulin26-like intrinsic protein 21 [Source:UniProtKB/TrEMBL;Acc:K4BEQ5]	70	10.5066	0.00119486	0.00167527	3	-0.900813	-0.653124	-0.262741	-1.12516	0.521368	-1.45787	1.87372	-0.383893
Les.3242.1.A1_at; Solyc12g094640.2; Glyceraldehyde-3-phosphate dehydrogenase [Source:UniProtKB/TrEMBL;Acc:K4DH36]	2	1.1758	0	0.00207284	29	-0.953591	0.0169956	0.227282	1.35356	1.83934	-0.875769	-0.959149	-0.835986	-1.0014	0.699546	0.88715	-0.39798	Les.4884.1.S1_at; Solyc11g073200.2; nan	4	0.502103	1.67503e-05	0.000985272	23	1.40756	-0.561079	-0.573908	-1.40643	-1.13104	0.799124	1.73092	0.398468	-0.350699	-0.0113551	-0.910795	0.609231	LesAffx.64946.1.S1_at; Solyc01g090300.3; nan	65	12.4474	0.00385257	0.00173994	2	-1.17919	-0.770116	1.22764	-1.0102	1.34459	-1.46289	-0.678173	-0.628324
Les.3242.2.S1_at; Solyc12g094640.2; Glyceraldehyde-3-phosphate dehydrogenase [Source:UniProtKB/TrEMBL;Acc:K4DH36]	2	1.23815	0	0.00217197	29	-0.846022	0.0472543	0.0734915	1.40928	1.97169	-0.744482	-0.984969	-0.867873	-0.911011	0.558104	0.833038	-0.538502	LesAffx.70136.2.S1_at; Solyc04g079050.2; nan	4	0.594113	0	0.00111195	23	-1.47671	0.780282	0.378375	1.40497	1.13935	-1.12791	-1.39149	-0.010564	0.0961177	-0.277679	1.07409	-0.588826	LesAffx.64978.1.S1_at; Solyc04g078640.2; nan	125	22.098	0.00754323	0.00311167	1	0.40228	0.645422	-0.868713	1.24939	-1.42055	2.13153	-0.832524	0.171382
Les.3242.3.S1_at; Solyc12g094640.2; Glyceraldehyde-3-phosphate dehydrogenase [Source:UniProtKB/TrEMBL;Acc:K4DH36]	2	1.08958	0	0.00193757	29	-0.975046	0.029526	0.136236	1.38874	1.92973	-0.66482	-1.07951	-1.14891	-0.633505	0.529886	0.813513	-0.325837	LesAffx.8808.1.S1_at; Solyc02g094400.3; nan	1	0.570915	0	0.00143528	24	-0.558574	0.597126	0.0859507	1.42386	1.65753	0.0581606	-1.03355	-1.18106	-0.951086	-1.00296	1.07001	-0.165399	LesAffx.64999.1.S1_at; Solyc03g123580.3; nan	74	11.8639	7.81682e-05	0.00167521	1	0.902989	0.858135	-1.77163	1.11839	-1.60114	1.18555	-1.13391	0.379958
Les.327.1.S1_at; Solyc07g043130.3; Root phototropism protein 2 [Source:Projected from Arabidopsis thaliana (AT2G30520) UniProtKB/Swiss-Prot;Acc:Q682S0]	0	0	0	0.000309119	57	-1.51824	-1.10957	-0.554433	-0.846388	0.900686	0.114852	0.691331	-0.338884	-0.38225	2.07785	0.266187	0.698862	Les.2299.1.A1_at; Solyc03g112010.3; nan	0	0	0	0.000306435	48	-1.09042	0.562481	0.868235	1.19748	1.49176	-1.44562	-1.11101	0.106391	-1.01549	0.80191	-0.133737	-0.23198	LesAffx.70873.1.S1_at; Solyc02g084960.1; nan	18	2.30932	0.00872134	0.00114665	1	1.45082	0.596939	-0.628456	-0.029365	-1.17973	-0.371714	-1.19071	1.52613
Les.3297.1.S1_at; Solyc03g115900.3; nan	51	10.9126	0.000580678	0.00324173	3	-0.559751	0.37861	0.409165	1.05079	1.51232	0.470709	-1.52175	-1.64513	-0.485407	-0.844979	0.736391	0.499024	Les.1757.1.A1_at; nan; nan	1	0.113043	0	0.000452895	3	0.82322	-0.14019	-0.351861	-0.370843	-0.829212	-0.044118	0.755343	0.933063	-1.12584	2.0911	-1.48494	-0.255725	Les.5126.1.S1_at; Solyc01g107170.2; ZF2 [Source:UniProtKB/TrEMBL;Acc:I3NN78]	112	17.657	0.0172696	0.00263209	2	0.827785	0.573061	-1.2364	1.26226	-1.22618	2.1915	-0.594211	-0.192091
Les.3297.3.S1_at; Solyc05g012805.1; nan	25	3.3972	0.000223338	0.00126552	3	-1.11436	0.357314	0.0359569	1.49778	1.75623	-0.14025	-1.033	-1.11678	-0.18325	-1.01937	0.945871	0.0138588	Les.1785.1.A1_at; Solyc05g010180.3; nan	29	4.2483	0.00503068	0.00242165	3	-0.60409	0.669891	0.35793	1.2442	1.26191	-0.647351	-0.916853	-0.972828	0.231154	-1.70383	1.3055	-0.225632	Les.5130.1.S1_at; Solyc11g013330.2; nan	4	0.454245	1.11669e-05	0.000510732	1	-1.20917	-0.65701	0.710987	0.0417096	1.00465	1.80684	0.688183	-1.62854
Les.3314.1.S1_at; Solyc07g056540.3; nan	1	0.102425	0	0.000339071	2	-0.0651194	-1.33098	-0.727621	-1.08162	0.487413	0.631709	1.64994	0.357575	-1.49572	1.05399	-0.266385	0.786824	Les.479.1.S1_at; Solyc08g078910.2; nan	7	1.00617	5.58344e-06	0.000754325	1	-0.024822	0.969935	0.351861	0.726702	0.757516	-1.29177	-0.565432	-0.527878	1.26724	-1.27603	1.08241	-1.46972	Les.2493.1.A1_at; Solyc08g007120.3; nan	56	8.80654	0.000273589	0.00133058	1	-1.14987	-0.685287	0.905377	-1.15189	1.07326	-1.30475	2.05409	-0.182419
Les.3322.1.S1_at; Solyc04g015750.3; nan	6	0.889196	0.00432717	0.00138459	3	-1.11186	-0.269705	0.181723	0.986147	1.89876	0.218564	-0.693472	-1.59711	-0.911403	-0.09049	1.00865	0.380193	Les.1929.2.S1_at; Solyc07g066470.3; Porphobilinogen deaminase, chloroplastic [Source:Projected from Arabidopsis thaliana (AT5G08280) UniProtKB/Swiss-Prot;Acc:Q43316]	51	8.74545	0.0135789	0.0044097	3	-0.761715	0.523742	0.449483	1.1845	1.23084	-0.18276	-1.25957	-1.29182	0.20654	-1.33986	1.37173	-0.13111	Les.5138.1.S1_at; Solyc09g056385.1; nan	125	19.1783	0.00973752	0.00255706	1	-1.09501	-1.04661	1.5544	-1.29787	1.46352	-1.28551	0.640274	-0.379552
Les.3330.1.S1_at; Solyc07g045440.1; nan	106	20.0249	0.00938577	0.00563376	2	-0.467591	0.897225	0.614811	1.54087	1.15104	-0.673468	-1.73668	-0.629888	0.237699	-0.837682	0.748685	-0.845018	Les.4825.1.S1_at; Solyc10g085225.1; nan	39	5.3072	0.00380791	0.00219579	1	-0.624055	0.912754	0.707743	0.965946	0.86807	-0.78934	-1.12729	-0.261488	0.834274	-1.78793	1.0698	-0.768483	Les.25.1.S1_at; Solyc09g065180.3; nan	109	18.6701	0.00212729	0.00278318	3	-1.20914	-0.544738	-0.176645	-1.17293	1.04147	-1.3222	1.27144	-0.616459
Les.3330.2.S1_at; Solyc07g045440.1; nan	102	19.9799	0.00260747	0.00555926	2	-0.447177	0.991364	0.594556	1.51389	1.09696	-0.743836	-1.74111	-0.542844	0.192124	-0.870556	0.782487	-0.825855	Les.4844.1.S1_at; Solyc03g082620.3; nan	32	4.20019	0.0111557	0.00268413	1	0.735199	-0.48533	-0.650067	-0.897355	-1.25283	1.16266	1.10772	0.986739	-0.833499	0.75781	-1.41232	0.781281	Les.2501.1.S1_at; Solyc11g006410.2; nan	141	21.8978	0.0134058	0.00356093	1	1.31868	0.746646	-0.607134	1.10416	-1.142	0.816542	-1.42626	1.09266
Les.3330.3.A1_at; Solyc07g045440.1; nan	89	17.0604	0.00294247	0.00487319	2	-0.347177	0.984551	0.692518	1.5299	1.04301	-0.837175	-1.78737	-0.523581	0.0267835	-0.708072	0.778052	-0.851443	Les.4910.1.S1_at; Solyc04g080700.3; nan	27	3.46481	0.0034059	0.00183796	1	0.783186	-0.668252	-0.42598	-0.799251	-1.30946	0.954586	0.910356	0.811502	-0.816688	1.27686	-1.46575	0.748888	Les.2504.1.A1_at; Solyc09g091550.3; nan	1	0.595629	0	0.00184434	20	-1.13095	-1.05724	-0.378963	-0.743068	1.70482	-0.75972	-0.634374	-0.136734
Les.3332.1.S1_at; Solyc07g043570.3; nan	2	0.23148	0.00216638	0.000916429	15	0.872942	-0.855369	-0.581316	-1.38123	0.207497	1.01636	1.53171	0.765616	-1.10471	0.168133	-1.26825	0.62862	C00000613.p.Coumaryl.alcohol.	1	0.128595	0	0.0020429	11	-0.489651	0.730201	0.518664	-0.40775	-0.194315	-1.31611	-0.526457	1.34727	0.735129	1.72687	-0.786504	-1.33735	LesAffx.51352.1.S1_at; Solyc04g077450.3; nan	0	0	0	0.000276651	50	0.47242	0.821607	1.62667	0.27826	1.24501	-0.441929	0.107351	0.929426
Les.3397.1.S1_at; Solyc03g098720.3; nan	1	0.784645	0	0.00206079	31	-0.114821	-0.945208	-0.634555	-0.486802	0.570482	1.54961	-0.0630804	-0.483274	-0.8788	-1.1851	0.725786	1.94576	Les.3242.2.S1_at; Solyc12g094640.2; Glyceraldehyde-3-phosphate dehydrogenase [Source:UniProtKB/TrEMBL;Acc:K4DH36]	3	1.52179	0	0.0022441	25	-1.07685	0.183814	0.197033	1.57478	1.68542	-0.986283	-0.990531	-0.48895	-0.89542	0.329114	1.01965	-0.551773	LesAffx.65682.1.A1_at; nan; nan	75	11.1113	0.00306531	0.00168661	1	1.09133	1.01936	-1.04089	1.12278	-1.41789	0.750695	-1.52487	0.361874
Les.3397.2.A1_at; Solyc03g098720.3; nan	1	0.784645	0	0.00206079	31	0.0966715	-1.03132	-0.641647	-0.476675	0.587465	1.52463	-0.00474535	-0.425279	-0.975899	-1.23932	0.742916	1.8432	Les.3242.3.S1_at; Solyc12g094640.2; Glyceraldehyde-3-phosphate dehydrogenase [Source:UniProtKB/TrEMBL;Acc:K4DH36]	3	1.63616	0	0.00240208	25	-1.13669	0.334586	0.30199	1.51629	1.58823	-0.967226	-1.15971	-0.467605	-0.823303	0.297674	1.05932	-0.543558	LesAffx.65941.1.S1_at; Solyc08g078640.2; nan	65	19.3234	0.000670013	0.00270318	2	-1.09993	-0.580132	1.47668	-1.37996	1.4217	-1.31844	-1.08827	0.416248
Les.3406.1.S1_at; Solyc10g055810.2; Basic 30 kDa endochitinase [Source:UniProtKB/Swiss-Prot;Acc:Q05538]	0	0	0	0.000309119	58	-1.85755	-0.894306	0.502895	1.11715	0.68598	-1.03993	0.473503	-0.256889	-0.643364	1.40417	0.921917	-0.41357	Les.2403.2.S1_at; nan; nan	0	0	0	0.000306435	49	0.21686	-0.411781	-0.532283	-0.779191	-0.0609806	-1.56392	1.12298	0.4162	0.428609	1.83356	0.723012	-1.39308	LesAffx.71021.1.S1_at; Solyc03g115860.3; nan	19	2.54819	0.000385257	0.000972004	1	1.53459	0.74833	-0.404116	0.631676	-0.801917	-0.675695	-1.28379	1.51716
Les.3408.1.S1_at; nan; nan	10	1.70138	5.58344e-06	0.00101242	3	0.490192	0.106016	-0.0167194	-0.829868	-1.18743	-0.935435	1.80391	0.998231	0.164676	1.30252	-0.98462	-0.911469	Les.1929.3.S1_at; Solyc07g066470.3; Porphobilinogen deaminase, chloroplastic [Source:Projected from Arabidopsis thaliana (AT5G08280) UniProtKB/Swiss-Prot;Acc:Q43316]	50	8.84665	0.0154773	0.0043353	3	-0.684575	0.585578	0.506773	1.09362	1.26079	-0.168201	-1.16057	-1.27776	0.222046	-1.57327	1.26822	-0.0726528	Les.5139.1.S1_at; Solyc07g062490.1; nan	3	0.536493	0	0.000438836	3	0.71743	0.607001	0.571833	0.945552	0.228054	1.93956	-1.10235	-0.265199
Les.3460.1.S1_at; Solyc10g083290.2; nan	0	0	0	0.000309119	59	0.248799	-0.309369	-0.455502	-1.38464	-1.37189	0.0138462	1.89077	-0.223101	0.802475	0.669277	-0.967863	1.08718	Les.2457.1.A1_at; Solyc01g111145.1; nan	0	0	0	0.000306435	50	-0.246788	0.31746	0.461851	1.80855	1.32844	-0.843484	-1.32478	-0.798035	-0.339594	-0.832067	1.11984	-0.651391	LesAffx.71242.2.S1_at; Solyc03g119540.3; nan	77	15.3008	0.00705747	0.00272838	3	-1.35057	-1.05468	-0.487649	-0.950486	0.848746	-0.821551	1.53854	-0.632321
Les.3465.1.S1_at; Solyc09g089610.3; Ethylene receptor [Source:UniProtKB/TrEMBL;Acc:Q5QG21]	19	2.67479	7.25847e-05	0.00111913	3	0.0233402	-0.357893	0.313356	-0.86615	-1.40623	-0.734214	1.34666	1.09953	0.423637	1.73169	-0.970477	-0.603253	Les.208.1.S1_at; Solyc09g075210.3; Heat shock protein [Source:UniProtKB/TrEMBL;Acc:Q42475]	1	0.155855	0	0.000411277	3	0.722582	-0.26424	-0.101312	-0.61693	-1.22897	0.30872	0.81412	1.2327	-0.440658	1.56208	-1.89367	-0.0944296	Les.5147.1.S1_at; nan; nan	22	2.84863	0.00130094	0.000825572	1	1.12606	0.531047	-0.590099	0.820431	-0.982556	0.553952	-2.58222	1.03647
Les.3470.1.S1_at; Solyc01g096810.3; EIL3 [Source:UniProtKB/TrEMBL;Acc:Q94FV2]	99	15.5037	0.00960352	0.00417449	2	0.411303	-0.997197	-0.195725	-1.63011	-0.878701	0.398446	1.62366	0.758514	-0.329973	1.24102	-0.997131	0.595902	Les.4921.1.S1_at; Solyc07g055065.1; nan	3	0.410588	0	0.000625743	1	-0.344687	0.502287	0.594624	1.45579	1.3075	-1.38764	-0.607591	-0.310374	0.0193849	-0.49366	0.962745	-1.69837	Les.2528.1.A1_at; Solyc05g055650.3; nan	89	14.3099	0.00225013	0.00205622	1	0.265634	0.425885	-1.28782	1.24434	-1.26162	1.21855	-1.24906	1.17163
Les.3471.1.S1_at; nan; nan	69	10.5108	0.00432158	0.00305121	2	0.1539	-0.814217	-0.396698	-1.47018	-0.73609	0.0409737	1.76416	1.10271	-0.0603955	1.33128	-1.13886	0.223411	Les.4922.1.S1_at; Solyc11g010625.1; nan	30	4.64562	2.23338e-05	0.00187387	1	0.361703	-0.949453	-0.69069	-1.02045	-0.456541	0.88893	1.06033	0.982798	-1.03318	1.53463	-1.26317	0.585099	Les.253.1.S1_at; Solyc08g068150.3; BURP domain protein RD22 [Source:Projected from Arabidopsis thaliana (AT5G25610) UniProtKB/Swiss-Prot;Acc:Q08298]	15	2.93591	0.00697372	0.00293899	9	-1.38043	-0.239304	-0.641799	0.623967	0.00741729	1.29619	1.78414	-1.48319
Les.3491.1.S1_at; Solyc08g083210.3; Endoglucanase [Source:UniProtKB/TrEMBL;Acc:K4CPW5]	0	0	0	0.000309119	60	0.991134	-0.495313	-0.809404	-1.54112	-0.518298	1.35839	1.09612	-0.323269	0.606091	0.168042	-1.44623	0.913858	Les.253.1.S1_at; Solyc08g068150.3; BURP domain protein RD22 [Source:Projected from Arabidopsis thaliana (AT5G25610) UniProtKB/Swiss-Prot;Acc:Q08298]	0	0	0	0.000306435	51	0.0174819	0.0808438	0.604043	1.52159	1.17114	-1.60368	-1.1396	-0.61613	-0.268441	0.963883	0.477933	-1.20906	LesAffx.71622.1.S1_at; Solyc05g012050.3; nan	29	4.09411	0.00721939	0.00189717	1	0.978922	0.70389	-0.693195	0.550165	-1.56748	-0.165667	-1.62832	1.03628
Les.3519.1.S1_at; Solyc01g107730.3; CycD3;2 protein [Source:UniProtKB/TrEMBL;Acc:Q9SMD5]	36	5.64747	0.00257955	0.00184194	2	0.276236	1.30319	0.793768	1.32428	0.0753459	-0.61936	-1.9504	-0.853283	0.684333	-0.661045	0.500957	-0.874017	Les.4934.1.S1_at; Solyc05g014120.1; nan	5	0.614775	5.58344e-06	0.000523035	1	0.123347	-0.183802	-0.262122	-0.971653	-1.17166	1.05489	0.683193	0.732361	-1.06839	1.82726	-1.29761	0.534192	Les.2560.1.S1_at; Solyc07g049530.3; 1-aminocyclopropane-1-carboxylate oxidase 1 [Source:UniProtKB/Swiss-Prot;Acc:P05116]	64	9.94317	0.000212171	0.00141907	1	1.60482	0.430585	-0.48898	1.15584	-1.99689	1.13383	-0.779877	0.254026
Les.3524.1.S1_at; Solyc06g074240.2; nan	13	1.70027	0.00227246	0.00106564	2	0.336498	-1.09253	-0.865958	-1.48334	-0.0730377	1.09712	1.63703	0.560309	-0.672652	0.168883	-0.802157	1.18985	Les.4957.1.S1_at; Solyc09g007940.3; nan	34	5.89339	0.000279172	0.00226387	1	0.0305656	0.892738	0.818492	0.727912	0.820544	-0.796114	-1.14597	-0.572639	1.00532	-1.87457	0.920074	-0.826352	Les.2569.1.S1_at; Solyc05g007770.3; NAC domain-containing protein 1 [Source:UniProtKB/Swiss-Prot;Acc:K4BWV2]	33	5.16213	0.0145281	0.00182906	4	0.156152	0.336472	-0.831059	1.48989	-1.17496	2.2711	-0.813741	-0.712352
Les.3534.1.S1_at; Solyc04g078360.2; nan	0	0	0	0.000309119	61	0.636411	0.974357	0.316821	1.23192	1.03581	-1.06002	-1.58559	-0.856083	-0.577648	0.734309	0.396354	-1.24664	Les.2569.1.S1_at; Solyc05g007770.3; NAC domain-containing protein 1 [Source:UniProtKB/Swiss-Prot;Acc:K4BWV2]	0	0	0	0.000306435	52	0.136623	-0.363853	-0.283153	-0.563136	-0.888634	-0.573385	0.546814	1.13515	-0.185736	2.56018	-0.767102	-0.753767	LesAffx.71664.1.S1_at; nan; nan	10	1.78706	8.93351e-05	0.00223744	4	-0.177965	-0.339839	1.5447	-0.958575	1.67131	-1.49824	1.19908	0.500765
Les.3544.1.S1_at; Solyc03g007960.3; Carotene beta-hydroxylase [Source:UniProtKB/TrEMBL;Acc:Q0GGX1]	26	4.03333	9.49185e-05	0.00131716	2	0.580264	-0.28485	-0.449391	-1.74954	-0.889635	0.186294	1.71327	1.07042	-0.589657	1.16187	-0.840284	0.09124	Les.4987.1.S1_at; Solyc06g075360.3; nan	30	3.92605	0.00170853	0.00197592	1	0.58739	-0.658305	-0.505709	-0.9811	-1.23437	0.984924	0.849408	0.858992	-0.726582	1.16285	-1.41637	1.07887	Les.2591.1.S1_at; Solyc01g059965.1; Glucan endo-1,3-beta-glucosidase B [Source:UniProtKB/Swiss-Prot;Acc:Q01413]	28	4.79558	0	0.000857024	2	1.68517	-0.289322	-0.525649	1.03967	-0.665263	1.97557	0.404543	-0.0501034
Les.3550.1.S1_at; nan; nan	0	0	0	0.000309119	62	-1.39435	-1.40747	-0.724161	0.0353168	0.877638	-0.45593	1.22433	1.08542	-0.719367	1.4408	0.406056	-0.368284	Les.266.1.S1_at; Solyc05g051750.3; nan	0	0	0	0.000306435	53	-1.09743	-0.0608772	0.0968313	0.706636	0.683159	1.0013	-1.66978	-0.903457	-1.16301	0.559331	0.276406	1.57089	LesAffx.72.1.S1_at; Solyc11g069450.1; nan	52	7.11534	0.0186431	0.00199974	2	0.0880519	0.774084	-0.932997	1.51995	-1.10547	2.08304	0.17533	-0.851092
Les.3568.1.S1_at; Solyc10g086520.2; nan	0	0	0	0.000309119	63	-0.516967	-0.111505	0.0279491	0.416086	0.745101	1.1261	-1.47173	-1.39343	0.437434	-1.38897	0.728349	1.40158	Les.270.1.S1_at; Solyc04g074860.3; nan	0	0	0	0.000306435	54	0.0588461	0.207001	0.740283	0.595541	1.03532	-2.01722	-0.58832	-0.200616	0.337406	0.58225	1.00118	-1.75167	LesAffx.770.1.S1_at; Solyc07g008440.3; nan	107	17.5039	0.00773307	0.00240643	2	1.10579	0.7488	-0.95665	1.25775	-1.06321	2.02274	0.133072	0.0526833
Les.3581.1.S1_at; Solyc08g062450.1; Class II small heat shock protein Le-HSP17.6 [Source:UniProtKB/TrEMBL;Acc:Q96489]	0	0	0	0.000309119	64	-1.15025	-1.33576	-0.600045	0.987183	1.10606	-0.897517	0.661761	1.06423	-0.777066	1.31874	0.333133	-0.710474	Les.2858.1.S1_at; Solyc06g074120.3; Bell-like homeodomain protein 2 [Source:UniProtKB/TrEMBL;Acc:Q7Y0Z7]	0	0	0	0.000306435	55	-1.33959	0.232896	0.321557	1.33651	1.0389	-1.4321	-0.916596	0.0766109	-0.585881	1.50923	0.442764	-0.684296	LesAffx.7704.1.S1_at; Solyc04g015030.3; nan	42	12.3166	0.00432717	0.00196782	2	-1.39523	-0.55004	1.59073	-0.605773	1.3696	-1.53299	-0.80272	0.895643
Les.3590.1.S1_at; Solyc01g099630.3; Probable xyloglucan endotransglucosylase/hydrolase 1 [Source:UniProtKB/Swiss-Prot;Acc:Q40144]	114	20.7374	0.00540477	0.0054008	2	-0.0931326	1.04223	0.51418	1.48024	1.01413	-0.343538	-1.84478	-0.780645	0.195811	-1.24329	0.622952	-0.564163	Les.5054.1.S1_at; Solyc08g078910.2; nan	20	2.59896	0.00179787	0.0015738	1	-0.703547	1.0365	0.900436	0.646379	0.994629	-0.940249	-1.04635	-1.02573	0.944431	-1.04861	1.16051	-0.918396	Les.2620.1.S1_at; Solyc06g084045.1; nan	97	19.108	0.00050251	0.00294574	3	-1.77779	-0.748979	-0.174532	-0.938765	0.884353	-1.42088	1.19104	-0.336573
Les.3594.1.S1_at; Solyc02g092790.3; nan	74	11.5623	0.00271914	0.00307871	2	0.243	1.16105	0.521081	1.34953	0.719889	-0.33194	-2.0118	-1.0444	0.328708	-0.962093	0.604925	-0.577952	Les.5147.1.S1_at; nan; nan	53	7.94676	0.0122333	0.00452837	1	0.900106	-0.636184	-0.77458	-0.905786	-1.08817	1.14061	1.19917	0.638299	-0.773198	0.606863	-1.38256	1.07542	Les.2620.2.S1_at; Solyc06g084045.1; nan	103	20.7288	0.00117811	0.00317217	3	-1.6965	-0.725394	-0.227549	-0.970902	0.944202	-1.41308	1.25617	-0.343027
Les.3620.1.S1_at; Solyc02g071730.3; Floral homeotic protein AGAMOUS [Source:UniProtKB/Swiss-Prot;Acc:Q40168]	85	14.31	0.00150195	0.00392983	2	0.342105	-1.17063	-0.305619	-1.53174	-1.11637	0.721054	1.58157	0.561622	-0.172332	0.987685	-0.80877	0.911412	Les.5263.1.S1_at; Solyc07g052240.3; nan	61	9.81747	0.0076549	0.00454486	1	-0.50708	0.948482	0.809347	0.994279	0.982806	-1.1551	-1.36106	-0.503311	0.828372	-0.849477	0.994558	-1.18181	Les.2626.1.S1_at; Solyc03g093360.3; nan	202	40.5163	0.00614737	0.00539495	1	-0.978793	-0.684486	0.537327	-1.12625	1.21022	-1.83698	1.38126	-0.470269
Les.3632.1.S1_at; Solyc03g122340.3; Lipoxygenase [Source:UniProtKB/TrEMBL;Acc:K4BN32]	0	0	0	0.000309119	65	0.0924204	-0.820524	0.325625	-1.37729	-0.165471	1.79709	-1.17928	-0.95087	0.868812	0.353248	-0.286147	1.34238	Les.2886.1.A1_at; Solyc02g036370.3; nan	0	0	0	0.000306435	56	-0.577906	-0.491629	-1.30573	0.046169	-0.0780264	0.176364	0.777406	0.689523	-1.77979	1.69175	-0.351174	1.20303	LesAffx.81.2.S1_at; Solyc07g005330.3; Beta-glucosidase 08 [Source:UniProtKB/TrEMBL;Acc:B5M9E5]	67	10.7917	0.0008431	0.00177653	1	-1.39524	-0.211819	1.37494	-0.396086	1.52215	-0.842448	0.783704	-1.51254
Les.3637.1.S1_at; Solyc06g059840.3; nan	53	8.30468	0.00243438	0.00267374	2	0.897369	-0.604607	-0.673806	-1.77487	-0.994278	0.537282	1.5433	0.947802	-0.170405	0.591008	-0.938272	0.639483	Les.5282.1.S1_at; Solyc12g095810.2; nan	73	11.3874	0.00702397	0.00456879	1	0.299744	-0.868054	-0.637737	-1.05085	-1.10923	0.793005	0.880207	0.945164	-0.52164	1.64795	-1.20388	0.825306	Les.2643.1.S1_at; Solyc03g031890.3; nan	84	15.5486	0.00105527	0.00205329	1	0.179198	0.294524	-1.24951	0.867274	-1.19209	2.45995	-0.363644	0.651181
Les.3640.1.S1_at; Solyc04g050440.3; nan	0	0	0	0.000309119	66	1.08422	-0.398422	-0.53283	-1.2046	-0.846192	1.47909	0.986517	-0.313556	-0.401152	-0.714102	-0.776537	1.63756	Les.2915.1.A1_at; Solyc03g117675.1; nan	0	0	0	0.000306435	57	0.0146333	-0.850789	-0.748569	-0.762953	-0.0430865	0.328975	0.55414	0.727848	-0.878821	2.326	-1.27743	0.610056	LesAffx.846.2.S1_at; Solyc08g005800.3; nan	83	15.2293	0.00203796	0.00235977	1	-1.34118	-0.114372	0.879166	-0.432293	0.97768	-1.2973	1.5817	-1.24335
Les.3649.1.S1_at; Solyc05g053550.3; nan	0	0	0	0.000309119	67	-0.357529	-1.00683	-1.07041	-0.078208	1.32647	0.94684	0.781028	-0.0629169	-1.67261	-0.758699	0.696685	1.25618	Les.2971.1.S1_at; Solyc09g083440.3; nan	0	0	0	0.000306435	58	-1.39628	-0.385577	-1.06803	-0.0939473	-0.242415	1.27281	-0.609431	-0.124134	-0.982857	1.28606	0.77196	1.57185	LesAffx.9038.3.S1_at; Solyc04g078290.3; nan	0	0	0	0.000276651	55	1.91538	0.554707	1.08891	0.509524	1.06832	-0.0360845	-0.126877	0.104259
Les.3652.1.S1_at; Solyc10g079860.2; nan	0	0	0	0.000309119	68	0.727845	-0.283906	-0.438476	-0.404849	-1.02736	-0.861836	1.97111	0.406482	-0.144615	1.68437	-0.803016	-0.825759	Les.3054.1.S1_at; Solyc12g011450.2; Chlorophyll a-b binding protein 13, chloroplastic [Source:UniProtKB/Swiss-Prot;Acc:P27489]	0	0	0	0.000306435	59	-1.44094	0.110423	0.41932	1.15858	1.48611	-1.15329	-0.959151	-0.3865	-1.0882	0.28077	1.16419	0.408689	LesAffx.9910.1.S1_at; Solyc03g116890.3; nan	0	0	0	0.000276651	56	0.585207	-0.0055987	0.155571	0.889172	-1.34239	1.40487	-1.21848	0.894003
Les.3663.1.S1_at; Solyc02g093580.3; Pectate lyase [Source:UniProtKB/TrEMBL;Acc:K4BDF4]	0	0	0	0.000309119	69	-0.493208	-1.39256	-0.324011	-1.37387	-0.794359	0.353989	-0.0230418	0.816824	1.59833	1.50755	-0.469735	0.594088	Les.3119.3.S1_at; Solyc06g073260.3; chloroplast RNA binding [Source:Projected from Arabidopsis thaliana (AT1G09340) TAIR;Acc:AT1G09340]	0	0	0	0.000306435	60	-0.983263	-0.00485386	-0.340069	1.24431	1.36087	0.542874	-0.7398	-1.02782	-0.919932	-1.24232	1.0946	1.0154	GC_4_Silane..trimethyl.2.methylbutoxy..	0	0	0	0.000276651	57	-0.3157	-0.291609	0.0770428	0.062805	0.242465	-1.50361	-1.40254	-0.222978
Les.3664.1.S1_at; Solyc09g075360.3; Endoglucanase [Source:UniProtKB/TrEMBL;Acc:Q42875]	0	0	0	0.000309119	70	0.827533	0.288636	0.369018	-0.0683585	-0.561325	0.95075	-1.59693	-1.28028	0.708413	-1.42609	0.37108	1.41755	Les.3157.1.S1_at; Solyc03g097870.3; nan	0	0	0	0.000306435	61	-0.0719886	-0.0617643	-0.649207	-1.13432	-1.32798	0.329213	0.644417	1.41347	0.0262467	1.66132	-1.38762	0.558222	GC_6_Silane....1.ethylpentyl.oxy.trimethyl.	0	0	0	0.000276651	58	-0.340072	0.0023944	-0.513367	0.195776	0.228102	-1.12322	-0.104129	-1.12492
Les.3667.1.S1_at; Solyc08g081620.3; Endoglucanase [Source:UniProtKB/TrEMBL;Acc:Q42871]	0	0	0	0.000309119	71	1.60561	1.26429	0.46807	-0.377039	-1.76728	-0.632993	-0.622596	-0.214385	0.623383	0.930552	-0.172903	-1.1047	Les.327.1.S1_at; Solyc07g043130.3; Root phototropism protein 2 [Source:Projected from Arabidopsis thaliana (AT2G30520) UniProtKB/Swiss-Prot;Acc:Q682S0]	0	0	0	0.000306435	62	-1.09829	-0.802163	-0.735688	-0.531781	-0.081406	-0.105826	0.560281	1.10442	-1.04065	2.01684	-0.470243	1.18451	GC_8_Silane..trimethyl..1.methylhexyl.oxy..	0	0	0	0.000276651	59	0.294542	0.194841	-0.334955	0.604755	-0.484751	-0.934497	-1.60633	-0.717526
Les.3679.1.S1_at; Solyc05g051200.1; nan	0	0	0	0.000309119	72	-1.40671	0.390972	0.896615	1.69064	0.894422	-0.825717	-1.13224	-0.788121	-0.0354702	0.575815	0.722706	-0.982904	Les.3303.1.S1_at; Solyc06g053810.3; nan	0	0	0	0.000306435	63	-0.0924814	-0.228829	-0.125097	-1.27318	-1.51407	1.04818	-0.211087	0.707754	-0.031237	1.42012	-1.13518	1.4351	GC_10_Tetrasiloxane..decamethyl.	0	0	0	0.000276651	60	-0.433708	1.31702	0.863139	0.0272596	0.43648	1.57141	0.642839	-0.594068
Les.3687.1.S1_at; Solyc08g068700.1; N-hydroxycinnamoyl-CoA:tyramine N-hydroxycinnamoyl transferase THT7-1 [Source:UniProtKB/TrEMBL;Acc:Q8RXB7]	2	0.317374	5.58344e-06	0.00128499	23	-0.533717	-1.41213	-0.373274	-0.958458	0.687233	0.864364	1.59589	0.163823	-1.25442	0.402139	-0.539312	1.35786	Les.1511.2.S1_at; Solyc08g077510.3; nan	3	1.01293	0	0.00271817	20	0.280872	0.848193	0.783861	1.2844	1.00034	-1.37868	-0.607432	-0.631496	0.134337	-0.522901	0.682347	-1.87385	LesAffx.62669.2.S1_at; Solyc11g072470.2; nan	9	1.61432	2.23338e-05	0.00163776	9	-0.758883	-0.271687	-1.19653	-0.0536918	0.132685	1.1661	1.83977	-1.24751
Les.3688.1.S1_at; Solyc09g091300.1; S-protein homologue [Source:UniProtKB/TrEMBL;Acc:Q9AVU9]	0	0	0	0.000309119	73	1.22438	0.949477	0.442685	0.362024	-0.249259	1.3627	-1.26171	-1.37083	0.40262	-1.63003	-0.250527	0.0184635	Les.3406.1.S1_at; Solyc10g055810.2; Basic 30 kDa endochitinase [Source:UniProtKB/Swiss-Prot;Acc:Q05538]	0	0	0	0.000306435	64	-0.720976	0.0653935	0.154278	1.27259	1.41641	-1.04559	-0.6341	-1.05782	-0.335833	0.401659	1.62418	-1.14018	GC_11_Tetrasiloxane..decamethyl.	2	0.336861	5.58344e-06	0.00269174	8	0.0970408	-0.493228	-0.249276	0.570535	-0.802773	-1.21315	-0.811031	-1.08293
Les.369.1.S1_at; Solyc02g088100.3; Expansin [Source:UniProtKB/TrEMBL;Acc:Q9ZP31]	33	4.85348	2.23338e-05	0.00145278	2	0.207687	1.23841	0.488922	1.4198	0.759456	-0.518799	-1.64285	-0.116808	0.0765046	-1.05117	0.600974	-1.46213	Les.5309.1.S1_at; Solyc10g076250.2; nan	24	3.4759	0.000223338	0.00158406	1	0.133605	-0.434383	-0.4798	-1.15539	-1.30344	0.920233	0.886617	0.936671	-0.510333	1.34566	-1.37186	1.03242	Les.2651.1.A1_at; nan; nan	62	18.7811	8.37516e-05	0.00256656	2	-1.021	-0.552014	1.99743	-1.23307	1.48847	-1.07875	-0.969519	-0.128302
Les.3692.1.S1_at; Solyc06g065820.3; Ethylene response factor 1 [Source:UniProtKB/TrEMBL;Acc:Q8S9H4]	63	10.2839	0.00601895	0.00304849	2	-0.153438	1.33234	0.610315	1.38977	0.645475	-0.981244	-1.79191	-0.521186	0.278239	-0.511861	0.760591	-1.05709	Les.5363.1.S1_at; Solyc02g080880.3; nan	75	11.3635	0.00227246	0.00444573	1	0.323575	-0.899161	-0.696083	-1.0168	-1.11568	0.927095	0.916647	0.744113	-0.876077	1.6021	-0.885424	0.975701	Les.2667.2.S1_at; Solyc06g066370.3; nan	43	6.49166	0.000318256	0.00102414	2	0.509482	0.154345	-0.486099	0.96099	-0.894542	2.47916	0.281684	0.233833
Les.37.1.S1_at; Solyc02g061770.3; nan	17	2.87135	1.11669e-05	0.00118533	2	1.11341	-0.133572	-0.696707	-1.61945	-1.0698	0.555909	1.72695	0.843077	-0.298456	0.137261	-1.06157	0.502951	Les.5382.1.S1_at; Solyc03g121440.3; nan	12	1.91415	0	0.000972863	1	-0.0242742	-0.716575	-0.657798	-1.13485	-1.24027	0.843821	0.519896	1.2455	-0.195225	1.41117	-1.17952	1.12813	Les.2668.2.A1_at; Solyc01g107390.3; nan	0	0	0	0.000276651	32	0.812489	0.0332466	0.816247	0.683438	-1.03729	1.61221	0.703891	0.861559
Les.3700.1.S1_at; Solyc07g008240.3; Non-symbiotic hemoglobin class 1 [Source:UniProtKB/TrEMBL;Acc:Q9AWA9]	38	6.04165	0.000111669	0.00176325	2	-0.185351	1.142	0.751653	1.45539	1.08092	-0.0692204	-1.73653	-0.968578	0.10623	-0.780117	0.278006	-1.0744	Les.5437.1.S1_at; Solyc06g066800.2; nan	39	5.20238	0.0051926	0.00240827	1	-0.774094	0.961194	0.87438	1.30734	0.915848	-0.831241	-1.30532	-0.561773	0.588427	-1.31884	0.896067	-0.751995	Les.2696.1.S1_at; Solyc07g065110.1; nan	141	24.2952	0.00154103	0.00318374	1	-1.17404	-0.295795	0.5037	-1.13937	0.8984	-2.17403	1.05125	-0.511346
Les.3701.1.S1_at; Solyc03g120380.3; Auxin-responsive protein [Source:UniProtKB/TrEMBL;Acc:G9HPW6]	13	1.73259	6.70013e-05	0.000757613	3	-0.158337	0.504513	0.583901	0.785785	1.51316	0.923627	-1.47131	-1.04346	-0.443367	-1.70946	0.0184657	0.49649	Les.21.1.S1_at; Solyc01g087780.2; Subtilisin-like protease [Source:UniProtKB/TrEMBL;Acc:O82006]	1	0.108849	0	0.000372003	3	-1.22932	0.628227	0.624422	1.1077	0.946693	-0.135379	-1.42733	-1.37168	0.823878	-0.707252	1.14173	-0.401691	Les.5161.1.S1_at; nan; nan	68	17.9507	0.000424342	0.00252588	2	-1.55008	-0.260638	1.29658	-0.909287	1.14039	-1.84207	-0.602652	-0.134376
Les.3707.1.S1_at; Solyc06g084070.3; Auxin-responsive protein [Source:UniProtKB/TrEMBL;Acc:G9HPV3]	43	6.20258	0.00317698	0.0018116	2	-0.723692	0.7656	0.309485	1.50932	1.11852	-0.130007	-1.73379	-0.894608	0.659546	-0.98994	0.769271	-0.659702	Les.5439.1.S1_at; Solyc04g077050.3; nan	34	4.95315	0.000960352	0.00219468	1	0.470127	-0.92973	-0.956677	-1.04025	-0.914695	1.15197	0.89673	0.145949	-0.739388	1.44147	-0.80941	1.28391	Les.270.1.S1_at; Solyc04g074860.3; nan	6	0.821265	0.0124902	0.00121773	9	-0.467673	-0.356848	0.483123	0.280197	0.948835	0.998457	1.57373	-1.6433
Les.3712.1.S1_at; Solyc09g098160.3; Pirin-like protein [Source:UniProtKB/Swiss-Prot;Acc:Q9SEE4]	0	0	0	0.000309119	74	-1.37871	-0.632552	0.115822	1.02677	0.324839	-1.06512	1.13169	0.817552	-0.813556	1.24349	0.599133	-1.36936	Les.3460.1.S1_at; Solyc10g083290.2; nan	0	0	0	0.000306435	65	1.40289	-0.642361	-0.522927	-1.64253	-1.06585	0.47255	1.52728	-0.352119	0.650749	-0.0984499	-0.689898	0.960672	GC_13_Pyridine..2.hydroxy...1TMS.	0	0	0	0.000276651	61	-0.37033	-0.483802	-0.0812574	-0.621482	-0.0148223	-1.39427	1.91652	-0.74438
Les.3721.1.S1_at; Solyc03g115650.3; Eukaryotic translation initiation factor 5A-1 [Source:UniProtKB/Swiss-Prot;Acc:Q9AXQ6]	32	6.2123	0.000508093	0.0020552	1	-0.0533445	-1.20355	-0.151209	-1.57034	0.20077	0.360556	1.35895	0.892367	-0.815731	1.56421	-0.985773	0.403094	Les.2207.1.A1_at; Solyc12g040790.2; nan	11	1.36411	1.11669e-05	0.000796917	1	0.221085	0.881277	1.06745	0.933009	0.844611	-1.01347	-0.914254	-1.09264	0.698013	-1.26781	0.8787	-1.23597	Les.1213.1.A1_at; Solyc06g068540.3; nan	174	33.9003	0.00237855	0.00456611	1	0.809359	0.66889	-0.902782	1.07411	-1.45893	1.72126	-1.41047	0.512786
Les.3733.1.S1_at; Solyc06g049050.3; Expansin [Source:UniProtKB/TrEMBL;Acc:O82625]	12	1.7342	0.000139586	0.00085159	2	-1.34301	0.663845	0.179666	1.60531	1.23641	-0.209298	-1.36445	-0.950578	0.0151721	-0.32301	1.13489	-0.644945	Les.5467.1.S1_at; Solyc10g083510.2; nan	7	0.902002	0	0.00067746	1	-0.457526	0.993701	0.839673	0.180221	0.810276	-1.10516	-1.35377	-0.323407	1.26051	-1.31767	1.18878	-0.715626	Les.2700.1.S1_at; Solyc01g044240.3; nan	50	9.56027	0.00110552	0.00172555	2	0.396596	0.565705	-1.28108	1.04745	-0.901334	2.08061	0.930817	-0.808914
Les.376.1.S1_at; Solyc02g063150.3; Ribulose bisphosphate carboxylase small chain 1, chloroplastic [Source:UniProtKB/Swiss-Prot;Acc:P08706]	73	16.9316	0.00523168	0.0049264	3	-0.449607	0.362357	0.443481	1.31793	1.43788	0.303964	-1.58446	-1.41371	-0.629448	-0.937949	0.826999	0.322572	Les.218.1.S1_at; Solyc02g080200.3; nan	14	1.95152	0.000463426	0.0012154	3	-0.970104	0.812099	0.549798	0.636896	0.985053	0.0825521	-1.25188	-1.27859	0.422756	-1.55965	1.36302	0.208045	Les.5177.1.S1_at; Solyc02g064830.3; nan	0	0	0	0.000276651	43	0.484294	-0.834795	1.282	-1.00945	0.853127	-0.980482	-0.211827	2.22046
Les.3761.1.S1_at; Solyc05g006980.3; nan	46	7.06513	0.00325515	0.00212696	2	0.414076	-0.912054	-0.270504	-1.47773	-0.716456	0.210024	1.51638	0.792721	-0.23011	1.61499	-1.22909	0.287755	Les.5479.1.S1_at; Solyc07g065540.1; nan	27	3.84317	0.000223338	0.00167243	1	-0.433595	0.806913	0.785756	0.997759	0.996042	-0.638758	-1.59017	-0.459886	0.707733	-1.61215	0.998263	-0.557906	Les.2723.1.S1_at; nan; nan	158	30.7342	0.00448909	0.00403971	1	-1.16786	-0.519966	0.985014	-0.6455	1.09999	-1.8909	0.914462	-0.682362
Les.3769.1.S1_at; Solyc08g008087.1; nan	0	0	0	0.000309119	75	-0.880033	-1.1718	-0.766522	-1.1397	1.23194	0.149717	1.12627	1.06563	-0.997926	1.407	0.13936	-0.163951	Les.3465.1.S1_at; Solyc09g089610.3; Ethylene receptor [Source:UniProtKB/TrEMBL;Acc:Q5QG21]	0	0	0	0.000306435	66	-0.129628	0.305782	0.491558	-0.989616	-0.979336	-0.853741	0.58431	1.31625	0.202848	1.97434	-1.20548	-0.717283	GC_17_M000000_A104001.101.xxx_NA_1020.15_PRED_VAR5_ALK_NA	1	0.193377	0	0.00159007	8	-0.445513	-0.175599	-0.573045	0.689973	-1.01196	-0.410249	-0.70405	-0.748244
Les.3774.1.S1_at; Solyc09g075820.3; Hexose transporter [Source:UniProtKB/TrEMBL;Acc:Q9STA8]	33	4.93146	0.00190954	0.00161482	3	0.169966	-0.332119	-0.581922	-1.05413	-1.03195	-0.720417	2.10097	1.11542	0.236985	1.16029	-0.848822	-0.21426	Les.23.1.S1_at; Solyc12g013620.2; Jasmonic acid 2 [Source:UniProtKB/TrEMBL;Acc:Q9SQL0]	7	0.976647	0.000117252	0.00110668	3	0.916548	-0.636138	-0.323275	-0.713178	-0.866035	-0.0352376	1.29681	0.872043	-0.638714	1.90697	-1.29013	-0.489672	Les.5263.1.S1_at; Solyc07g052240.3; nan	83	15.0797	0.000809599	0.00221477	1	-1.46801	-0.0119831	1.24236	-0.521626	1.24943	-1.28413	0.730688	-1.29731
Les.3777.1.S1_at; Solyc01g107810.3; nan	1	0.13205	0	0.000603325	3	0.58423	-0.202538	-0.554844	-0.959191	-0.716138	-0.290516	2.25723	0.0569214	-0.464534	1.55055	-1.00402	-0.257142	Les.2417.1.S1_at; Solyc06g076790.1; nan	3	0.405544	0	0.000516979	3	-0.720723	0.283051	-0.0224726	1.17856	1.41936	0.338476	-0.512536	-1.03835	-0.716445	-1.86701	1.11822	0.539881	Les.5264.1.S1_at; Solyc02g092670.2; nan	9	1.14774	7.81682e-05	0.000666145	1	-1.32493	-0.954852	0.420338	-0.419606	1.31599	0.251119	2.27061	-1.03491
Les.3779.1.S1_at; Solyc02g082930.3; Acidic 27 kDa endochitinase [Source:UniProtKB/Swiss-Prot;Acc:Q05540]	3	0.441813	0	0.00058392	3	-0.27401	-0.00920816	-0.225843	-0.589835	-0.940278	-1.1647	1.3141	1.17507	0.743201	1.7151	-0.585734	-1.15786	Les.25.1.S1_at; Solyc09g065180.3; nan	13	1.83888	0.00120602	0.00133151	3	-0.58919	0.502801	0.406913	1.49855	1.39439	-0.583252	-1.0777	-0.919452	-0.0665303	-1.27353	1.30776	-0.600769	Les.5286.1.S1_at; Solyc08g082630.3; nan	5	0.729691	0	0.000365318	2	-1.10796	-0.0312069	2.1464	-0.48585	1.43821	-1.04546	0.63311	-1.34214
Les.3932.1.S1_at; Solyc10g085550.2; nan	80	13.9337	0.00210496	0.00379315	1	0.0281439	1.18751	0.480956	1.2805	0.485719	-0.397505	-1.82423	-0.63602	0.677208	-1.53494	0.736742	-0.484085	Les.221.1.S1_at; Solyc02g081190.3; nan	18	2.60356	0.00108319	0.00179344	1	0.869096	-0.198937	-0.310457	-1.02619	-1.35142	0.940056	1.00952	0.779438	-0.719079	0.796031	-1.6703	0.882232	Les.1219.1.A1_at; Solyc02g084430.3; nan	9	1.90246	5.58344e-06	0.00081431	2	0.752015	1.27877	-0.784584	2.03902	-0.469501	0.897383	0.0543033	-1.17596
Les.3932.2.S1_at; Solyc10g085550.2; nan	68	11.7938	0.00125627	0.00326301	1	-0.0331819	1.18577	0.592052	1.25202	0.440142	-0.403468	-1.77089	-0.629189	0.788806	-1.55462	0.673941	-0.541379	Les.2268.1.A1_at; nan; nan	45	6.89567	0.000882184	0.00271442	1	0.457962	-0.994674	-0.766776	-0.795047	-1.00079	0.855678	0.651056	1.00007	-0.660687	1.6835	-1.22999	0.799696	Les.122.1.S1_at; Solyc02g082920.3; Acidic 26 kDa endochitinase [Source:UniProtKB/Swiss-Prot;Acc:Q05539]	67	10.412	0.0014852	0.00165982	3	1.89586	0.792621	-0.0756434	1.13769	-1.35724	0.680735	-1.43545	0.0853446
Les.3932.3.S1_at; Solyc10g085555.1; nan	72	12.7135	0.000949185	0.00348015	1	0.00183252	1.17988	0.640285	1.30347	0.413635	-0.436628	-1.85105	-0.612704	0.625453	-1.53224	0.663402	-0.395335	Les.2351.1.S1_at; Solyc04g077130.1; plastid-specific 50S ribosomal protein 6 [Source:Projected from Arabidopsis thaliana (AT5G17870) TAIR;Acc:AT5G17870]	63	10.964	0.00550527	0.00418181	1	-0.270517	0.822758	0.637424	0.903714	0.908923	-0.794318	-1.10842	-0.815985	0.86686	-1.77415	1.20118	-0.577469	Les.127.1.S1_at; Solyc01g087850.2; Subtilisin-like protease [Source:UniProtKB/TrEMBL;Acc:O82777]	4	0.659168	0.0028308	0.000946138	9	-1.05962	-0.157819	0.15226	0.627704	0.772038	0.768803	1.27254	-1.97907
Les.3980.1.S1_at; Solyc01g006540.3; nan	12	1.6329	2.79172e-05	0.000720827	2	-0.269526	1.0138	0.606465	1.60425	1.44364	-0.739156	-1.26959	-0.51184	-0.890843	-0.816688	0.614307	-0.784811	Les.5494.1.S1_at; Solyc02g068120.3; nan	30	5.37113	0.000530427	0.00254693	1	-0.51344	0.72399	0.813617	0.934402	1.05935	-1.3188	-1.19243	-0.131802	0.933804	-0.850813	0.927718	-1.38559	Les.2723.2.S1_at; Solyc04g077615.1; nan	155	30.6124	0.00393633	0.00408074	1	-1.23242	-0.377838	0.905725	-0.655435	1.08934	-1.88884	0.876988	-0.869402
Les.4022.1.S1_at; Solyc03g020050.3; nan	35	5.39159	0.000541594	0.00168873	2	1.00591	-0.95032	-0.766125	-1.70641	-0.731038	0.611504	1.19144	0.572366	-0.269974	0.921934	-0.939809	1.06051	Les.5523.1.S1_at; Solyc02g088390.3; nan	39	5.89181	0.00994969	0.00300271	1	-0.713825	0.941451	0.814631	1.23789	1.03107	-0.939022	-1.49512	-0.722959	0.621288	-0.946278	0.924822	-0.753951	Les.276.1.S1_at; Solyc12g017240.2; Xyloglucan endotransglucosylase/hydrolase [Source:UniProtKB/TrEMBL;Acc:K4DD58]	2	0.470655	0	0.000788379	9	-1.44151	-0.288183	-0.150683	-0.129539	0.842914	1.31728	1.13622	-1.15894
Les.4026.1.S1_at; Solyc01g080010.2; nan	3	0.547502	0	0.000685962	18	-0.849398	0.328696	-0.179953	1.56805	1.96861	-0.842814	-1.14628	-0.355686	-0.403009	-0.0773265	0.856124	-0.86702	LesAffx.16164.1.S1_at; Solyc03g115930.2; nan	2	0.400413	3.35007e-05	0.00202959	15	1.92511	-0.663819	-0.449791	-0.785797	-0.871947	0.567282	1.92978	-0.178428	-0.20528	0.0742606	-1.02298	-0.318396	LesAffx.57572.1.S1_at; Solyc02g090490.3; Patatin [Source:UniProtKB/TrEMBL;Acc:K4BCJ8]	84	13.1714	0.00317698	0.00178235	1	0.958873	0.555608	-0.742014	0.750623	-1.47781	2.00188	-0.0548315	1.0325
Les.4065.1.A1_at; Solyc01g066560.3; Protein DETOXIFICATION [Source:UniProtKB/TrEMBL;Acc:K4AWQ7]	18	3.14067	2.23338e-05	0.00126312	2	1.10394	-0.220502	-0.598579	-1.89742	-0.869385	0.854134	1.41869	0.703839	-0.603935	0.356205	-0.916785	0.669801	Les.5584.1.S1_at; Solyc10g083730.2; nan	27	3.83766	0.000173087	0.00167479	1	0.205247	-0.599706	-0.510124	-0.757688	-1.19436	0.80757	0.472478	0.906366	-0.733073	2.01492	-1.26919	0.65756	Les.2767.1.S1_at; Solyc07g052480.3; nan	3	0.385719	0	0.000525331	1	-0.396675	0.692349	0.250716	0.932654	-0.959406	1.36608	-2.56195	0.181456
Les.4067.1.S1_at; Solyc12g006450.2; nan	2	0.22668	0	0.000468351	3	-0.743835	-0.91202	-0.613523	-1.01285	-0.933914	-0.791865	1.60723	1.35824	0.455586	1.43701	0.0469661	0.102964	Les.2504.1.A1_at; Solyc09g091550.3; nan	23	4.14436	0.000865433	0.00205938	3	-1.0857	0.546881	0.851052	1.23212	1.34632	-0.0926524	-1.15416	-1.27381	-0.56246	-1.00896	1.07392	0.127456	Les.5356.1.S1_at; Solyc05g055880.3; nan	27	4.03548	0.000201004	0.00108479	1	1.39868	1.07242	0.0230998	0.473107	-1.17084	-0.00782208	-1.2488	0.704555
Les.4072.1.S1_at; Solyc07g065210.3; nan	24	10.7547	0.00462867	0.00305592	4	0.574766	1.10326	0.576862	0.814392	-0.0835576	0.313495	-1.89539	-1.08973	0.73567	-1.67529	0.430455	0.195071	LesAffx.59336.1.S1_at; Solyc01g109500.3; nan	5	0.59969	0	0.000698657	3	-0.953218	0.689459	0.115946	1.50851	0.990443	-0.82855	-0.95119	-0.57257	0.501138	-1.06148	1.48312	-0.921609	LesAffx.22812.2.S1_at; Solyc03g117870.3; nan	34	4.52119	0.00051926	0.000834846	3	1.71844	0.00240726	-0.112864	1.01946	-1.08052	1.17118	-1.54326	1.24044
Les.4075.1.S1_at; Solyc11g005070.2; nan	40	5.69446	0.00374649	0.00176632	2	0.465788	-0.746042	-0.437649	-1.6928	-1.48101	0.2916	1.48344	0.818139	0.0987596	1.11761	-0.574883	0.657049	Les.5591.1.S1_at; Solyc04g072460.3; nan	36	5.89597	0.00270239	0.00227652	1	0.433234	-1.04106	-0.867462	-0.653898	-0.902943	0.725334	0.690602	0.853273	-0.842583	1.98194	-0.992309	0.615866	Les.2792.1.A1_at; Solyc06g067980.3; nan	40	6.37921	0.00318256	0.00164064	1	1.6067	0.941092	-1.48558	0.904176	-1.39736	-0.0112763	-1.0184	1.12956
Les.41.1.S1_at; Solyc10g055410.2; Transcription factor [Source:UniProtKB/TrEMBL;Acc:Q43525]	15	2.10022	0.000150753	0.000824192	4	-0.238103	-1.31729	-1.10111	-0.978946	0.563888	0.150013	1.5136	1.2282	-1.29298	1.06682	0.152627	0.253275	LesAffx.59463.1.S1_at; Solyc02g082850.3; nan	5	0.517111	0.0015187	0.000562851	3	0.243614	-0.537975	-0.779712	-1.30596	-1.25988	0.678559	1.07969	1.47885	-0.576286	1.01839	-0.904877	0.865592	LesAffx.23349.1.S1_at; Solyc07g041720.1; nan	0	0	0	0.000276651	48	-1.26729	-1.25805	-0.179052	-1.29396	0.855468	-1.23203	0.890175	0.198596
Les.412.1.A1_at; Solyc02g067950.3; nan	25	10.7302	0.00657729	0.00307304	4	0.718468	1.2897	0.645335	0.776118	-0.377693	0.295997	-1.86763	-1.2097	0.804359	-1.37256	0.298402	-0.000789431	LesAffx.61034.1.S1_at; Solyc08g077060.3; nan	20	3.20993	0.000223338	0.00161185	3	-0.224574	0.832343	0.760452	1.1506	0.987967	-0.12316	-1.35064	-0.987609	0.243181	-1.94658	0.828487	-0.17047	LesAffx.23433.1.S1_at; Solyc04g007400.3; nan	1	0.119123	0	0.00184434	6	-0.226403	-0.578081	-1.69777	-0.428368	-0.608379	-0.256074	-1.5954	0.959888
Les.415.1.A1_at; Solyc08g005680.3; Dimethylallylcistransferase, chloroplastic [Source:UniProtKB/Swiss-Prot;Acc:C1K5M2]	8	1.00665	1.11669e-05	0.000555645	2	0.220532	1.11677	0.640923	1.37797	1.31289	-1.12893	-1.8043	-0.39719	-0.38892	-0.294316	0.187315	-0.842745	Les.564.1.S1_at; Solyc05g005080.3; Endoglucanase [Source:UniProtKB/TrEMBL;Acc:K4BW39]	2	0.231501	0	0.000449855	1	-0.459915	0.68562	0.685091	1.04873	0.938966	-1.7199	-1.01536	0.0369926	0.373622	0.424254	0.737781	-1.73588	Les.2832.1.S1_at; Solyc01g105070.3; Peroxidase [Source:UniProtKB/TrEMBL;Acc:K4B277]	15	2.27982	3.35007e-05	0.000710858	1	-1.23226	-1.07086	0.391162	-1.07378	0.703398	0.324382	1.34538	-0.803281
Les.4150.1.S1_at; Solyc08g078695.1; Mitochondrial small heat shock protein [Source:UniProtKB/TrEMBL;Acc:O80432]	0	0	0	0.000309119	76	-1.49458	0.0549407	-0.0598161	2.11448	0.964214	-0.628223	-0.212692	-0.650704	-0.398821	0.0224394	1.21544	-0.926677	Les.3466.1.S1_at; Solyc01g109150.3; nan	0	0	0	0.000306435	67	0.936607	-0.293803	0.0189903	-0.858572	-0.494795	1.68219	0.455866	-0.479162	-0.385623	-1.63135	-0.57655	1.6262	GC_19_Lactic.acid..DL...2TMS.	0	0	0	0.000276651	62	-0.661475	-0.502277	-0.972331	0.151585	-0.526301	-1.30422	0.69568	-0.964373
Les.417.1.S1_at; Solyc04g078195.1; nan	41	5.83429	0.00566719	0.00176964	2	-0.570148	0.922837	0.731527	1.48735	1.08386	-0.0584463	-1.56638	-1.25813	-0.183604	-0.992333	0.818795	-0.415328	Les.612.1.S1_at; Solyc04g055260.3; nan	9	2.33195	0	0.001233	1	-0.512595	0.877774	0.765576	0.747321	0.820654	-0.397046	-0.993413	-0.209528	0.727126	-2.32702	0.918015	-0.416861	Les.2839.1.S1_at; Solyc04g071070.2; nan	0	0	0	0.000276651	33	-0.352521	-0.0634286	-0.539691	-0.606331	-0.589153	-0.339336	-1.29202	1.30689
Les.4217.1.S1_at; Solyc07g041900.3; nan	6	0.786971	0.0026633	0.00110481	1	1.0655	-0.600202	0.28025	-1.59627	-0.870995	0.221862	1.07502	1.00858	-0.296849	1.25691	-1.49215	-0.0516482	Les.2353.1.A1_at; Solyc10g079910.2; nan	16	2.25049	0.00379674	0.00220129	1	1.18429	-0.308791	-0.386506	-1.21385	-1.21115	1.22552	1.18563	0.657134	-0.772644	0.0438556	-1.29551	0.892018	Les.1287.1.A1_at; Solyc08g076880.3; nan	3	1.02727	5.58344e-06	0.00256256	10	-0.936454	-0.469194	-1.18861	0.402186	-0.865946	1.74804	-0.731181	-1.45629
Les.423.1.S1_at; Solyc09g011470.3; AT5g02020/T7H20_70 [Source:Projected from Arabidopsis thaliana (AT5G02020) UniProtKB/TrEMBL;Acc:Q9LZM9]	50	7.96567	0.00149636	0.00228182	2	0.124332	-0.911488	-0.498095	-1.51952	-0.834071	0.0623916	1.56566	0.803321	0.0670178	1.65942	-0.933171	0.414208	Les.612.2.A1_at; Solyc04g055260.3; nan	9	2.35339	0	0.00124101	1	-0.528119	0.862588	0.772808	0.768844	0.847378	-0.393324	-0.97764	-0.147032	0.714759	-2.3206	0.893827	-0.493487	Les.2842.1.S1_at; Solyc02g092880.3; AT4g37300/C7A10_60 [Source:Projected from Arabidopsis thaliana (AT4G37300) UniProtKB/TrEMBL;Acc:O23157]	41	11.1289	5.58344e-06	0.00163042	2	1.02381	-0.0661419	-1.46146	1.02876	-1.08897	1.55603	1.22349	-0.462291
Les.4233.1.S1_at; Solyc01g057000.3; nan	2	0.545898	1.11669e-05	0.00220981	5	-1.03912	-1.09199	-0.334263	-0.432473	1.44142	-0.720767	0.357754	0.527708	-0.860037	2.14904	0.184851	-0.182118	Les.3779.1.S1_at; Solyc02g082930.3; Acidic 27 kDa endochitinase [Source:UniProtKB/Swiss-Prot;Acc:Q05540]	1	0.108113	0	0.0020429	5	0.964607	0.162523	0.134107	-0.676964	-0.714746	-1.11924	0.817273	1.07868	-0.0150013	1.74309	-0.947911	-1.42642	LesAffx.31904.2.S1_at; Solyc08g080140.3; nan	168	36.4325	0.00439417	0.00477774	1	-0.992086	-0.322201	1.13532	-1.05728	1.12858	-1.99196	0.966385	-0.627045
Les.4233.2.A1_at; Solyc01g057000.3; nan	1	0.436171	0	0.00180991	5	-1.43404	-1.06119	-0.189337	-0.27049	1.308	-0.708986	0.460311	0.599558	-0.869177	1.98942	0.400037	-0.224099	Les.3491.1.S1_at; Solyc08g083210.3; Endoglucanase [Source:UniProtKB/TrEMBL;Acc:K4CPW5]	1	0.109615	0	0.000761545	6	1.23115	-0.482132	-0.300859	-1.59357	-1.10637	1.32649	0.6939	-0.407375	-0.196242	0.8859	-1.06615	1.01525	LesAffx.32198.1.S1_at; Solyc02g084950.3; nan	88	13.3693	0.00638187	0.00230373	1	0.8325	0.702995	-0.430624	0.839391	-1.09367	1.22106	-2.09798	1.00985
Les.424.1.S1_at; Solyc08g076220.3; Phosphoribulokinase [Source:UniProtKB/TrEMBL;Acc:K4CMY9]	51	8.81984	0.000379674	0.00282969	3	-0.579159	0.22189	0.15622	1.25074	1.86712	0.165141	-1.142	-1.09358	-0.811082	-1.25414	0.750128	0.468725	Les.2620.1.S1_at; Solyc06g084045.1; nan	46	9.52926	0.00233388	0.00455591	3	-0.750679	0.577673	0.584665	1.28348	1.25666	-0.153222	-1.54096	-1.27395	-0.0415568	-1.1114	1.12911	0.04018	Les.5371.1.S1_at; Solyc04g007770.3; nan	32	4.64022	0.000150753	0.000990351	3	-0.552589	-0.875313	-0.941214	-0.888418	0.292103	-0.951731	1.84299	-0.690851
Les.424.2.S1_at; Solyc08g076220.3; Phosphoribulokinase [Source:UniProtKB/TrEMBL;Acc:K4CMY9]	44	7.71189	0.00053601	0.00247091	3	-0.602266	0.224821	0.17146	1.26276	1.89412	0.119387	-1.19594	-0.928259	-0.872688	-1.23579	0.809857	0.352534	Les.2620.2.S1_at; Solyc06g084045.1; nan	49	10.3522	0.00316023	0.00495822	3	-0.78006	0.511895	0.588246	1.31895	1.33187	-0.181427	-1.43647	-1.24777	-0.144951	-1.11218	1.16555	-0.0136594	Les.5402.1.S1_at; Solyc01g108460.2; nan	1	0.110485	0	0.000398165	4	-0.515856	-0.952531	0.941057	-1.11521	1.38274	-1.05831	2.15756	0.454878
Les.4275.1.S1_at; Solyc01g110360.3; Fructose-bisphosphate aldolase [Source:UniProtKB/TrEMBL;Acc:K4B3P9]	19	2.74046	0.0035064	0.00130552	3	-0.734257	-0.355078	0.0363576	1.00474	1.82382	0.588957	-1.19609	-1.27481	-0.940369	-0.59671	0.867631	0.775807	Les.2626.1.S1_at; Solyc03g093360.3; nan	42	5.95029	0.0132104	0.00344353	3	-0.911789	0.689814	0.505416	1.35026	1.22201	-0.569177	-1.26029	-0.968564	0.404558	-1.26862	1.16877	-0.362405	Les.5416.1.S1_at; Solyc03g098700.1; nan	4	0.478102	0	0.000423086	4	-0.408414	-0.490007	-0.0637623	-0.846442	1.5806	-2.5153	0.771658	0.664016
Les.4291.1.S1_at; nan; nan	52	7.84849	0.00147403	0.00227975	2	-0.639848	0.662046	0.623314	1.55432	0.858809	-0.175756	-1.99231	-0.848804	0.119584	-0.904731	0.996395	-0.253023	Les.64.1.S1_at; Solyc03g006880.3; Gibberellin 20-oxidase-1 [Source:UniProtKB/TrEMBL;Acc:Q9ZPP4]	11	1.44999	0.00116694	0.00109277	1	-1.11294	0.138767	0.378013	0.874213	1.29023	-0.998877	-0.76802	-0.555319	1.00292	-1.07967	1.5896	-0.758901	Les.2852.1.S1_at; Solyc08g080650.2; nan	11	1.31523	0.000106085	0.000505128	2	0.376863	0.497938	0.0184371	1.63399	-1.07927	2.035	0.152447	-0.573698
Les.4291.2.S1_at; Solyc02g071700.3; nan	49	7.38578	0.000831933	0.0021171	2	-0.582293	0.636657	0.67815	1.5751	0.815135	-0.260428	-2.06104	-0.804724	0.239402	-0.807858	0.923751	-0.351852	Les.661.1.A1_at; Solyc06g068390.1; nan	14	2.10299	3.90841e-05	0.00144727	1	0.737254	-0.473166	-0.442227	-0.801533	-1.08466	1.34824	0.969513	0.957298	-0.951038	0.462852	-1.61909	0.896553	Les.2858.1.S1_at; Solyc06g074120.3; Bell-like homeodomain protein 2 [Source:UniProtKB/TrEMBL;Acc:Q7Y0Z7]	19	3.44729	0.00927968	0.00358813	9	-1.05826	-0.100719	-1.05282	0.818448	-0.107626	1.582	1.42589	-1.4489
Les.4301.1.S1_at; Solyc04g082010.1; Plastocyanin, chloroplastic [Source:UniProtKB/Swiss-Prot;Acc:P17340]	64	10.1703	0.008565	0.0032411	3	-0.170926	0.754155	0.442527	1.36343	1.28256	0.026226	-1.80113	-1.25704	-0.295919	-1.09353	0.770465	-0.0208172	Les.2888.1.S1_at; Solyc04g009030.3; Glyceraldehyde-3-phosphate dehydrogenase [Source:UniProtKB/TrEMBL;Acc:K4BP59]	39	8.76833	0.00405916	0.00428308	3	-0.978552	0.477451	0.525948	1.296	1.28883	-0.127956	-1.579	-1.15751	-0.246297	-0.923152	1.17072	0.253532	Les.5437.1.S1_at; Solyc06g066800.2; nan	127	23.1565	0.00466217	0.00316244	1	-1.01358	-0.196699	0.657327	-0.770422	1.0156	-1.8855	1.14474	-0.959384
Les.4317.1.S1_at; Solyc06g007180.3; nan	16	2.22739	0.00174762	0.000975213	3	-0.246531	-0.629911	-0.249462	-1.21742	-0.826866	-0.594175	1.68353	0.837557	0.201113	1.94895	-0.749688	-0.1571	Les.2933.1.S1_at; Solyc04g082630.3; Glyceraldehyde-3-phosphate dehydrogenase [Source:UniProtKB/TrEMBL;Acc:K4BVZ0]	40	7.5841	0.00106085	0.00362156	3	-0.798435	0.586309	0.578263	1.35091	1.25659	-0.256946	-1.21413	-1.29929	-0.284052	-1.31715	1.05912	0.338812	Les.5439.1.S1_at; Solyc04g077050.3; nan	116	22.1603	0.00142378	0.00284977	1	0.613924	0.0900712	-0.828927	1.12095	-1.29422	2.1934	-0.769224	0.863429
Les.4335.2.S1_at; Solyc07g061720.3; Gibberellin 2-oxidase [Source:UniProtKB/TrEMBL;Acc:A4GVL8]	12	1.51048	0.00118927	0.000770577	3	1.04538	-0.248023	-0.0897124	-1.82211	-1.52607	0.378123	0.982957	0.618774	0.585754	0.990867	-1.14797	0.232024	Les.2959.1.S1_at; Solyc10g018300.2; nan	23	3.64297	0.00231713	0.00206849	3	-0.671799	0.431011	0.413033	1.33338	1.25677	0.0475603	-0.961375	-1.40763	-0.321942	-1.57671	1.09961	0.358086	Les.5494.1.S1_at; Solyc02g068120.3; nan	96	17.9676	0.00116694	0.00282193	1	-1.33894	-0.426998	0.951813	-0.651221	0.943651	-1.10574	1.40499	-1.45032
Les.4345.1.S1_at; nan; nan	33	6.15035	0.000212171	0.00195851	3	-0.504977	0.24387	0.452917	0.737076	1.37413	0.761528	-1.45216	-1.56747	-0.831985	-0.893262	0.865764	0.814583	Les.3016.1.S1_at; Solyc07g063600.3; Chlorophyll a-b binding protein, chloroplastic [Source:UniProtKB/TrEMBL;Acc:K4CH43]	16	2.74507	0	0.0014462	3	-0.718592	0.525008	0.932288	1.1247	1.17308	-0.588764	-1.81303	-1.03028	-0.150547	-0.885708	1.00776	0.424085	Les.5517.1.S1_at; Solyc05g006030.3; nan	15	2.20229	0.000770515	0.000986648	2	-0.340473	0.665188	-1.47154	1.42575	-1.07485	1.57782	0.636665	-1.14698
Les.4345.4.A1_at; nan; nan	54	10.3748	0.000530427	0.0030909	3	-0.78981	0.640329	0.460427	1.0274	1.34764	0.397317	-1.38733	-1.50247	-0.543442	-1.05095	0.984573	0.416304	Les.3017.2.S1_at; Solyc12g044330.2; nan	11	1.88479	6.70013e-05	0.00109215	3	-1.36636	0.483608	0.23779	1.52432	1.17296	0.188459	-1.2537	-1.263	-0.57508	-0.618015	1.00758	0.461442	Les.5523.1.S1_at; Solyc02g088390.3; nan	101	18.4562	0.00180345	0.0025848	1	-1.05351	-0.130055	0.850014	-0.563615	1.39034	-1.52536	0.877671	-1.07422
Les.435.1.S1_at; Solyc05g050130.3; nan	1	0.101717	0	0.00034802	3	0.997937	0.205344	0.0222113	-1.08311	-1.12969	-0.663438	1.81867	1.13519	-0.195815	0.723735	-1.25997	-0.571061	Les.3073.1.S1_at; Solyc06g060340.3; Photosystem II 22 kDa protein, chloroplastic [Source:UniProtKB/Swiss-Prot;Acc:P54773]	18	2.62243	0.000809599	0.00145896	3	-0.922686	0.573749	0.474223	1.19656	1.27867	-0.266825	-0.80971	-1.04946	-0.187759	-1.74947	1.24805	0.21466	Les.5557.1.S1_at; Solyc06g009670.3; nan	20	3.1782	0.000508093	0.00115173	1	1.76651	1.34946	-0.906017	0.878047	-1.04084	-0.760623	-1.05999	0.708417
Les.4353.1.S1_at; Solyc03g093080.3; Xyloglucan endotransglucosylase/hydrolase [Source:UniProtKB/TrEMBL;Acc:K4BII5]	0	0	0	0.000309119	77	-1.61252	0.308696	0.543664	1.07657	1.19467	-1.18515	-1.1882	-1.00697	0.3908	0.575335	1.04348	-0.140387	Les.3488.1.S1_at; Solyc12g057040.2; Cryptochrome 1b [Source:UniProtKB/TrEMBL;Acc:Q93VS0]	0	0	0	0.000306435	68	-1.71218	0.12138	0.0035473	1.23415	1.29464	-0.881635	-1.34676	-0.224656	-0.520949	0.922975	1.04167	0.0678212	GC_23_Glycolic.acid..2TMS.	4	0.490803	0	0.000842973	4	-0.178588	-0.0875564	1.65254	-1.28331	0.716044	-1.23363	1.3422	1.43388
Les.4359.1.S1_at; Solyc08g067320.2; nan	54	10.8533	0.00226129	0.00320627	3	-0.454962	0.574222	0.654672	1.22022	1.28566	0.39377	-1.38309	-1.36402	-0.637364	-1.39012	0.649224	0.45179	Les.3127.1.S1_at; Solyc02g091560.3; Serine hydroxymethyltransferase [Source:UniProtKB/TrEMBL;Acc:K4BCV4]	25	4.21418	0.000904518	0.00222793	3	-1.06276	0.339119	0.389323	1.45735	1.4266	-0.253869	-1.27949	-0.81089	-0.495164	-1.13515	1.23056	0.194366	Les.5572.1.S1_at; Solyc11g012930.2; WAT1-related protein [Source:UniProtKB/TrEMBL;Acc:K4D697]	42	6.77697	0.00128419	0.00127049	2	0.0215908	0.388458	-1.88412	1.39116	-0.57031	2.17299	0.20498	-0.654033
Les.4359.2.A1_at; Solyc08g067320.2; nan	42	8.81685	0.000273589	0.00261131	3	-0.274254	0.679398	0.73464	1.30564	1.2048	0.309112	-1.47911	-1.42171	-0.700278	-1.2411	0.586765	0.296098	Les.3127.2.S1_at; Solyc02g091560.3; Serine hydroxymethyltransferase [Source:UniProtKB/TrEMBL;Acc:K4BCV4]	18	2.94875	0.00145169	0.00166701	3	-1.08073	0.224503	0.30124	1.49348	1.50521	-0.288157	-1.23599	-0.752603	-0.54468	-1.04688	1.26468	0.159911	Les.558.1.A1_at; Solyc01g105890.3; nan	8	0.881842	4.46675e-05	0.000398016	1	-1.62731	0.328786	1.57344	0.0645234	1.71311	-1.03656	-0.233156	-0.393765
Les.4383.1.S1_at; Solyc07g049140.3; Fruit-specific protein [Source:UniProtKB/Swiss-Prot;Acc:P14903]	0	0	0	0.000309119	78	-0.205096	0.484751	0.175701	1.02224	0.80842	-1.94209	0.0710061	0.762304	-0.976242	0.881225	0.536042	-1.61826	Les.3550.1.S1_at; nan; nan	0	0	0	0.000306435	69	0.0873928	-0.277837	-1.21028	0.8525	-0.309723	-0.0521731	1.03097	0.935438	-1.41329	1.84057	-1.05916	-0.424415	GC_30_Alanine..2TMS.	11	1.90153	0.00226129	0.00148974	1	-0.542887	-0.436059	0.241808	-0.614736	1.64722	-0.677354	2.55983	-0.227062
Les.4412.1.A1_at; Solyc11g072130.2; nan	94	17.3818	0.00252372	0.00469295	2	-0.229075	1.16834	0.69095	1.44588	0.968484	-0.709613	-1.85513	-0.510882	0.0946079	-0.908218	0.638096	-0.79344	Les.695.1.A1_at; Solyc11g072130.2; nan	58	9.53568	0.00225571	0.00426743	1	-0.680337	0.713574	0.767922	1.10053	1.08018	-1.34984	-1.14256	-0.24934	0.758409	-1.11119	1.06981	-0.95716	Les.2866.1.A1_at; Solyc10g054840.2; X intrinsic protein [Source:UniProtKB/TrEMBL;Acc:E3UMZ9]	8	1.35732	5.58344e-06	0.000754032	3	-0.900825	-0.605518	-0.49333	-0.344586	2.1738e-05	-0.0690806	2.32677	-0.901117
Les.4445.1.S1_at; Solyc10g047030.2; nan	0	0	0	0.000309119	79	0.687376	0.222084	-0.0131821	-0.628373	-1.39597	1.1072	-0.797005	-1.00828	1.3631	-1.22172	0.349003	1.33576	Les.3581.1.S1_at; Solyc08g062450.1; Class II small heat shock protein Le-HSP17.6 [Source:UniProtKB/TrEMBL;Acc:Q96489]	0	0	0	0.000306435	70	-0.423454	0.214862	-1.12956	1.85271	0.168805	0.0901117	0.293875	0.270654	-1.26635	1.66139	-0.9126	-0.820444	GC_36_Oxalic.acid..2TMS.	9	2.32777	8.93351e-05	0.00190917	1	-0.166456	-0.46842	-0.469428	-0.391687	1.3105	0.148232	2.87165	-0.442198
Les.4460.1.S1_at; Solyc01g097240.3; Pathogenesis-related protein P2 [Source:UniProtKB/Swiss-Prot;Acc:P32045]	12	1.62884	0.00034059	0.000904357	3	0.408455	-0.287107	-0.137802	-0.776786	-1.21301	-0.631633	1.83783	0.484888	0.521883	1.61339	-1.14824	-0.671868	Les.3214.2.S1_at; Solyc01g097340.3; GDP-mannose 3',5'-epimerase [Source:UniProtKB/TrEMBL;Acc:C6K2K9]	16	2.29765	0.00053601	0.00167634	3	-0.963972	0.500167	0.523606	1.26676	1.42112	-0.780483	-1.24449	-0.748506	0.241658	-1.19887	1.27418	-0.291165	Les.5581.1.S1_at; Solyc04g074640.3; nan	142	23.6557	0.00289781	0.00325502	1	-1.34801	-0.782576	0.199382	-1.08126	1.18811	-1.75544	0.872313	-0.0421481
Les.4467.1.S1_at; Solyc10g075070.2; Non-specific lipid-transfer protein [Source:UniProtKB/TrEMBL;Acc:K4D1U9]	0	0	0	0.000309119	80	-0.726649	-0.246518	-0.359174	0.284756	1.81584	-1.04239	-0.921942	0.482049	0.0843574	1.75713	0.145046	-1.27251	Les.3593.1.S1_at; Solyc02g084850.3; Abscisic acid and environmental stress-inducible protein TAS14 [Source:UniProtKB/Swiss-Prot;Acc:P22240]	0	0	0	0.000306435	71	0.847755	0.216513	0.553606	-0.502423	-0.477856	-0.458521	-0.110495	1.13064	-0.73568	2.05453	-1.17625	-1.34182	GC_40_Disiloxane..hexamethyl.	6	0.68268	1.11669e-05	0.000356162	1	0.934647	-0.684435	-0.0763261	-0.0685928	-0.511648	2.73299	-0.623074	0.0189928
Les.4483.1.S1_at; nan; nan	27	4.11251	0.000156336	0.00135627	2	0.0750036	-0.73538	-0.400933	-1.41528	-1.02901	0.790021	1.88951	-0.100068	0.0475927	0.627336	-1.0144	1.2656	Les.70.1.S1_at; Solyc02g081120.3; Homeobox protein SHOOT MERISTEMLESS [Source:Projected from Arabidopsis thaliana (AT1G62360) UniProtKB/Swiss-Prot;Acc:Q38874]	1	0.179915	0	0.000430969	1	0.285815	-0.543473	-0.684524	-1.08816	-1.24528	1.51939	0.905239	0.715906	-0.357132	-0.0490518	-1.05274	1.594	Les.2899.1.S1_at; Solyc03g111720.3; Peptide methionine sulfoxide reductase [Source:UniProtKB/Swiss-Prot;Acc:P54153]	9	1.24898	2.23338e-05	0.000716413	1	0.822783	1.35784	-0.757662	1.40366	-1.16233	-1.23779	-1.17955	0.55803
Les.4493.1.S1_at; Solyc10g086580.2; nan	30	4.9007	9.49185e-05	0.0019553	3	-0.872683	-0.0138397	0.197495	1.06993	1.79784	0.478879	-1.13821	-1.51098	-0.812996	-0.594482	0.802706	0.596344	Les.3217.2.S1_at; Solyc02g085950.3; Ribulose bisphosphate carboxylase small chain 3B, chloroplastic [Source:UniProtKB/Swiss-Prot;Acc:P05349]	35	6.59425	0.000491343	0.00317047	3	-0.702867	0.34196	0.42747	1.41657	1.34425	-0.354857	-1.47826	-1.21919	-0.361383	-0.939604	1.21979	0.306128	Les.5597.1.S1_at; Solyc05g056385.1; nan	0	0	0	0.000276651	44	0.507092	-0.333133	0.875762	-0.919776	1.17319	-1.16488	1.93433	0.947726
Les.45.1.S1_at; Solyc08g080650.2; nan	8	1.19167	0.000262422	0.000808575	3	-0.210911	-0.00247002	0.0896708	-1.05243	-1.10275	-0.853505	1.43245	1.15123	0.467281	1.7195	-0.792358	-0.845706	Les.324.1.S1_at; Solyc02g069460.3; nan	25	5.42895	5.0251e-05	0.00260986	3	-0.905179	0.435447	0.561456	1.28021	1.19883	-0.0258862	-1.44732	-1.50942	-0.214645	-0.920395	1.03448	0.512419	Les.5601.1.S1_at; Solyc02g071360.3; nan	18	2.53971	0.00936343	0.0018451	2	0.327821	-0.564904	-1.43844	0.754153	-0.832823	2.08886	1.24181	-0.764635
Les.4501.1.S1_at; Solyc09g011590.3; nan	0	0	0	0.000309119	81	0.0712901	0.639874	-0.450308	0.914086	-0.62715	-1.10515	2.27823	-0.727139	-0.594642	0.826273	-0.150988	-1.07437	Les.3635.1.S1_at; Solyc08g079870.2; nan	0	0	0	0.000306435	72	2.00665	-0.679074	-0.403174	-0.687678	-0.208172	0.162364	2.05125	-0.862815	-0.10237	-0.499228	-0.00625997	-0.771501	GC_46_Butyro.1.4.lactam..1TMS.	9	2.20773	0.000184254	0.00186793	1	-0.3396	-0.332295	-0.293796	-0.334003	-0.245906	-0.339302	3.2757	-0.340875
Les.4529.1.S1_at; Solyc02g091920.3; Xyloglucan endotransglucosylase/hydrolase [Source:UniProtKB/TrEMBL;Acc:K4BCZ0]	7	0.964327	0.00204912	0.000855199	18	-0.916805	0.742567	0.168763	1.73548	1.7774	-0.751923	-0.899178	-0.709791	-0.354219	-0.468981	0.591064	-0.914372	Les.5286.1.S1_at; Solyc08g082630.3; nan	3	0.400873	0.00235621	0.00100194	16	-0.920109	0.83269	0.828088	0.270104	0.845732	-1.29634	-1.24049	-0.0418936	1.25045	-0.596788	1.22652	-1.15795	LesAffx.58041.1.S1_at; Solyc07g063880.3; Putative beta-glucosidase 41 [Source:Projected from Arabidopsis thaliana (AT5G54570) UniProtKB/Swiss-Prot;Acc:Q9FIU7]	2	0.239046	1.11669e-05	0.000519608	2	-1.06059	-0.399314	-0.515962	0.802402	-0.166338	2.44289	-0.0679372	-1.20404
Les.4530.1.S1_at; nan; nan	12	1.71575	5.58344e-06	0.000785242	2	-1.06657	0.8554	0.266348	1.56766	0.886396	-0.87995	-1.22037	-0.834031	0.169011	-0.953827	1.37534	-0.165405	Les.796.1.A1_at; Solyc02g067750.3; nan	9	1.25096	0.00470126	0.00130986	1	0.929627	-0.150606	-0.355986	-1.38979	-1.21295	1.34914	0.809399	0.185764	-0.746321	0.458876	-1.22285	1.34569	Les.2922.2.A1_at; Solyc02g090350.3; nan	0	0	0	0.000276651	34	0.723594	1.0402	0.540344	1.40838	0.189824	0.670945	0.209489	0.873293
Les.4533.1.S1_at; Solyc09g007870.3; nan	7	2.42112	0	0.00282328	17	-0.835058	-1.03969	-0.895695	-1.07907	-0.891881	-0.910118	1.25219	0.932873	0.776359	1.18277	0.587269	0.920062	Les.3652.1.S1_at; Solyc10g079860.2; nan	4	0.725252	5.0251e-05	0.00255718	15	1.85702	-0.321496	-0.0906013	-0.951131	-1.03212	0.203498	1.85942	-0.11712	-0.0280165	0.472566	-1.02168	-0.830342	LesAffx.55504.1.S1_at; Solyc12g014310.2; nan	50	7.03671	0.00108319	0.0012297	1	0.124135	0.654866	-1.45427	0.894399	-1.38821	0.99387	-1.4709	1.00021
Les.4583.1.S1_at; Solyc07g006220.2; nan	14	2.43849	0	0.00128139	2	-0.650269	0.848615	0.532219	1.2435	1.23451	-1.10513	-1.61793	-0.124173	0.148594	0.231977	0.700936	-1.44284	Les.91.1.S1_at; Solyc07g056570.1; 9-cis-epoxycarotenoid dioxygenase NCED1, chloroplastic [Source:UniProtKB/Swiss-Prot;Acc:O24023]	5	0.803391	0	0.000587929	1	0.688333	-0.840622	-0.484297	-0.0950452	-0.940725	1.05692	0.47728	0.6448	-1.24497	1.61431	-1.53132	0.655333	Les.2933.1.S1_at; Solyc04g082630.3; Glyceraldehyde-3-phosphate dehydrogenase [Source:UniProtKB/TrEMBL;Acc:K4BVZ0]	107	22.5829	0.00120044	0.00352341	3	-1.67095	-0.791975	-0.144546	-0.890335	0.954134	-1.16254	1.35242	-0.531545
[truncated: 304 more rows]
[truncated: 27 more columns]

## Sheet: Dataset S5
	Dataset S5. The 83 genes involving carbohydrate metabolic process in the microarray dataset.
[truncated: 84 more rows]

## Sheet: Dataset S6
Dataset S6. The significant DEGs compared with Severianin and M82.
Significant, q-values < 0.05 and a |log2-fold change (FC)| > 1.0.
Severianin_vs_M82 at 0DAF													Severianin_vs_M82 at 2E-DAF													Severianin_vs_M82 at 2P-DAF
[truncated: 4,604 more rows]

## Sheet: Dataset S7
Dataset S7. The DEGs of Severianin compared with M82.
[truncated: 279 more rows]

## Sheet: Dataset S8
Dataset S8. Genes related to photosynthesis, sugar metabolism, cell division and expansion, and hormone were found in Severianin cultivar which showed similar trend in three mutant
[truncated: 48 more rows]

[truncated: 1 more sheets: Dataset S9]
