# Supplementary material for: Transcriptomic, Hormonomic and Metabolomic Analyses Highlighted the Common Modules Related to Photosynthesis, Sugar Metabolism and Cell Division in Parthenocarpic Tomato Fruits during Early Fruit Set
Source: Cells. 2022 Apr 22;11(9):1420. doi: 10.3390/cells11091420 (PMC9102895; doi:10.3390/cells11091420)
Supplement: Supplementary file 1 [file cells-11-01420-s001.zip › Supplementary Figures S1¿CS9.pdf]

## A

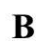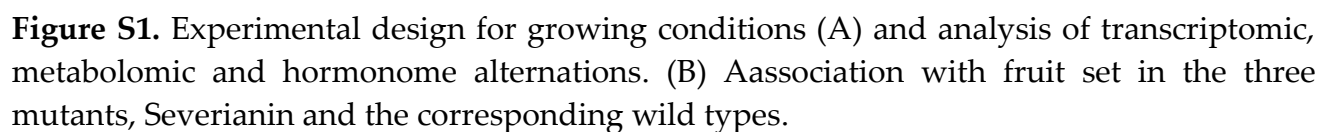

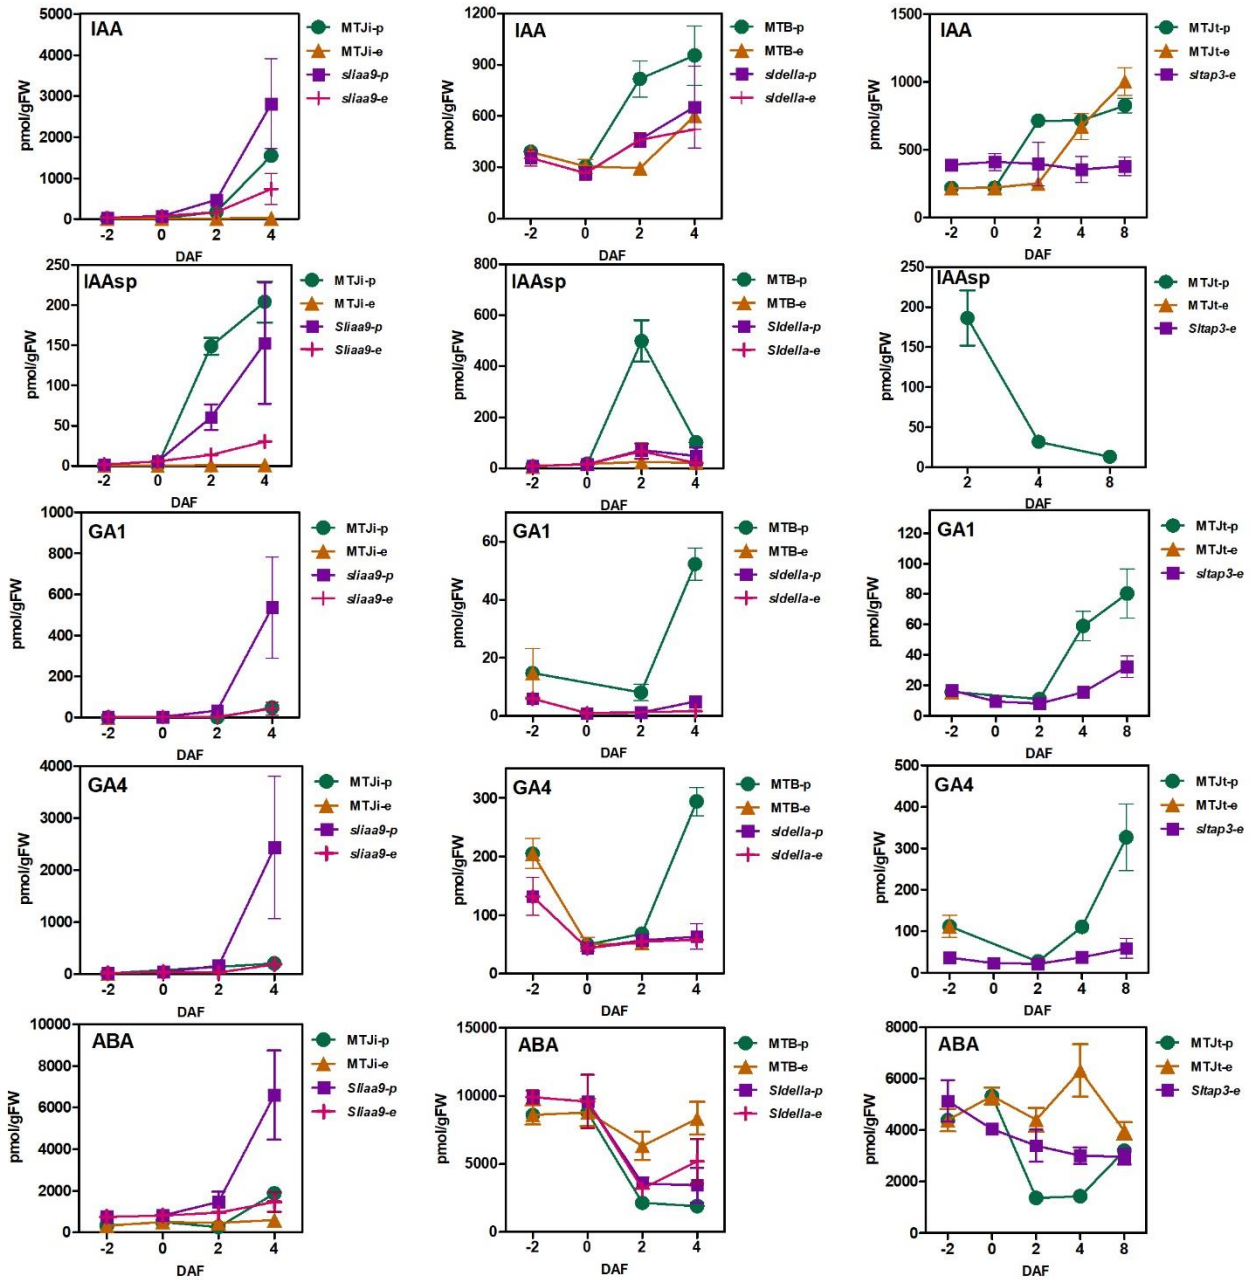

**Figure S2.** Accumulation patterns of the detected hormones and hormone derivatives during fruit setting in MTJ/*sliaa9*, MTB/*sldella* and MTJ/*sltap3*.

Abbreviations: IAA, indole-3-acetic acid; IAAsp, indoleacetylaspartate; GA, gibberellin; ABA, abscisic acid.

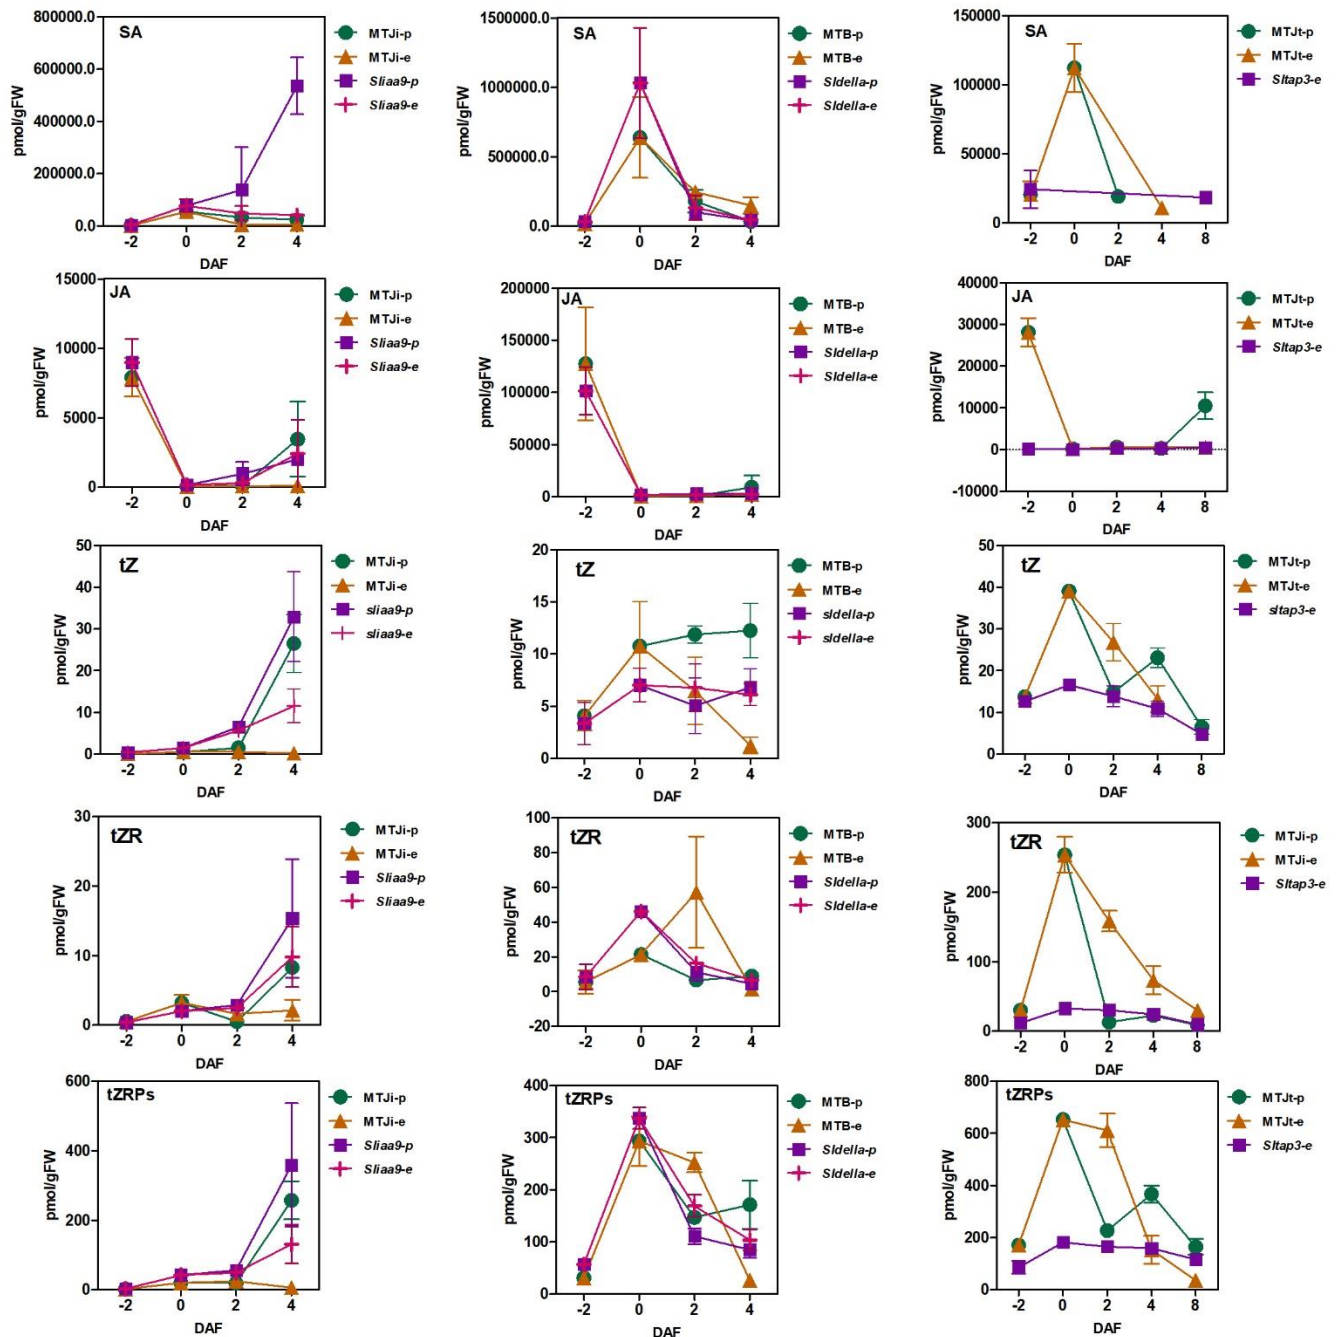

Figure S2 (continued).

Abbreviations: SA, salicyric acid; JA, jasmonic acid; tZ, *trans*-zeatin; tZR, tZ riboside; tZRPs, tZR-5'-monophosphate.

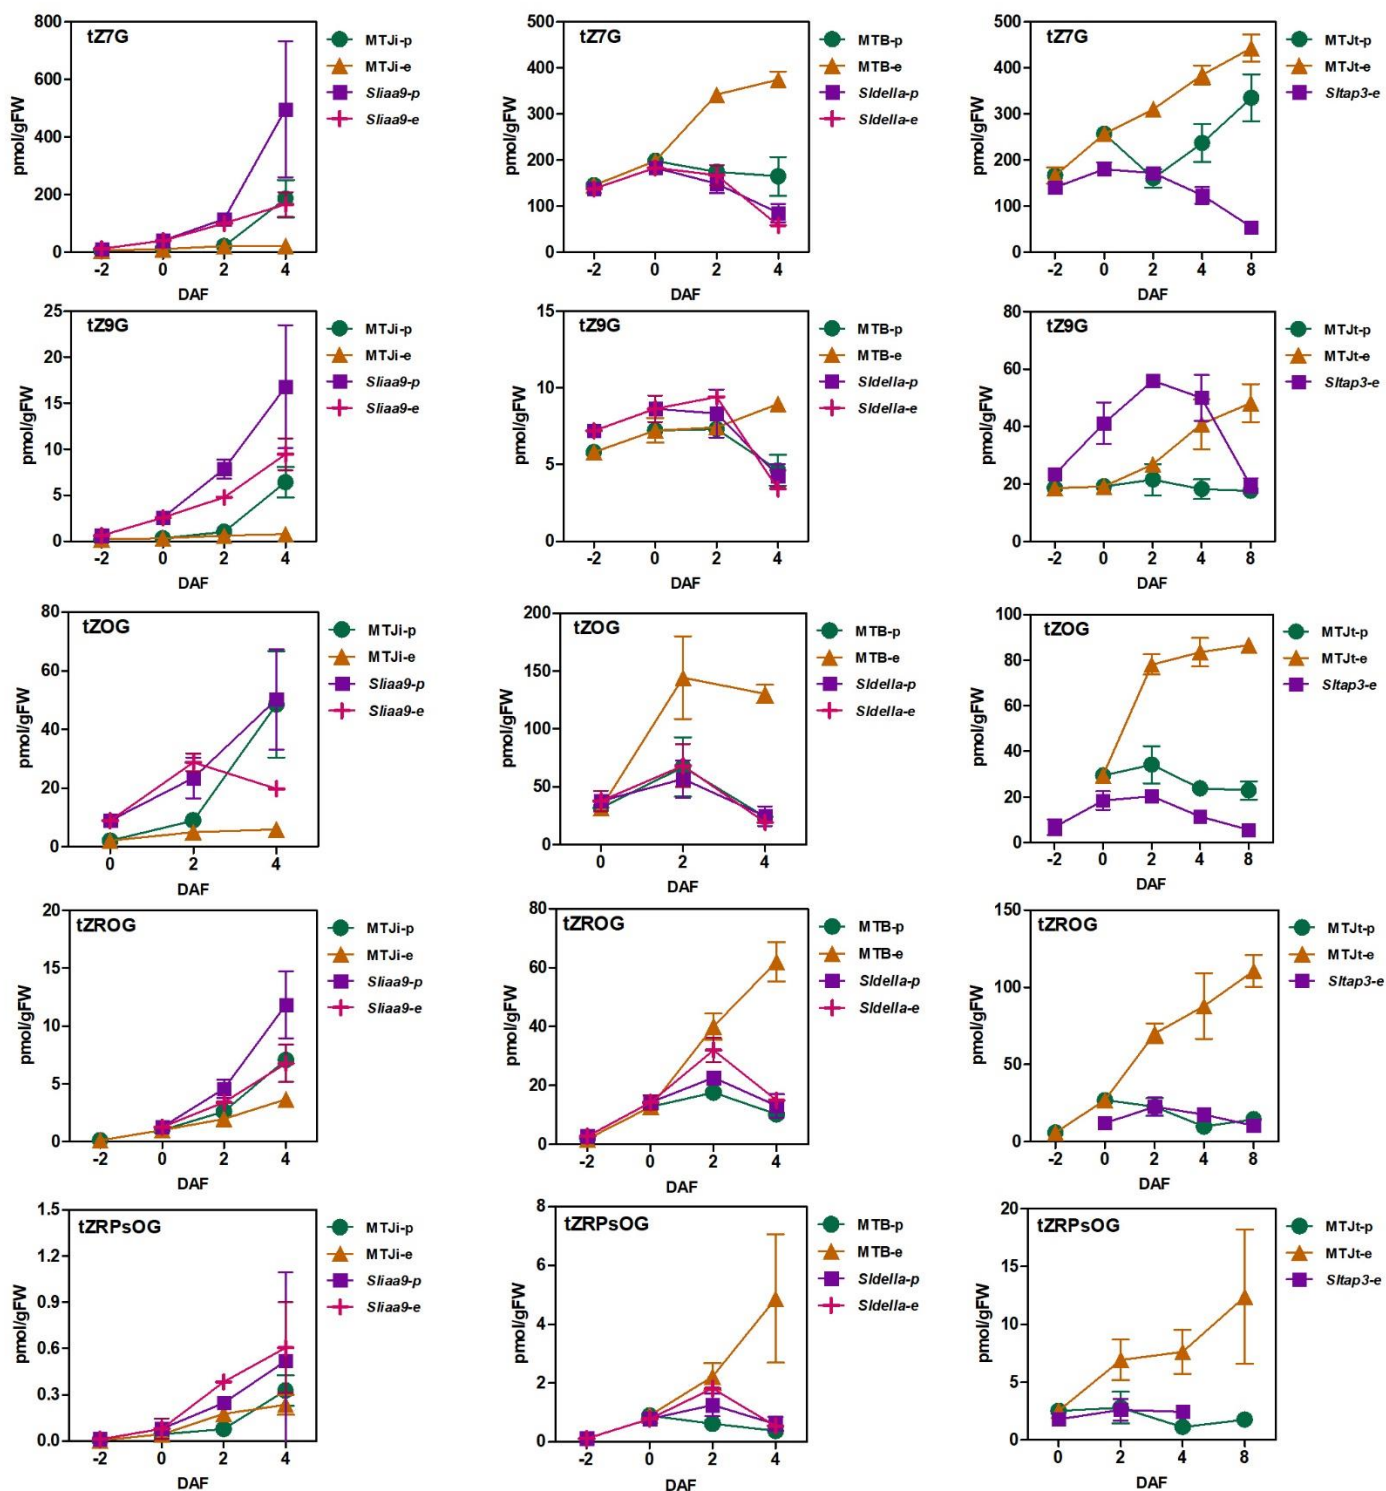

Figure S2 (continued).

Abbreviations: tZ7G, *trans*-zeatin-7-glucoside; tZ9G, *tZ*-9-glucoside; tZOG, *tZ*-O-glucoside; tZROG, *tZ*-riboside-O-glucoside; tZRPsOG, *tZR* 5'-phosphates-O-glucoside.

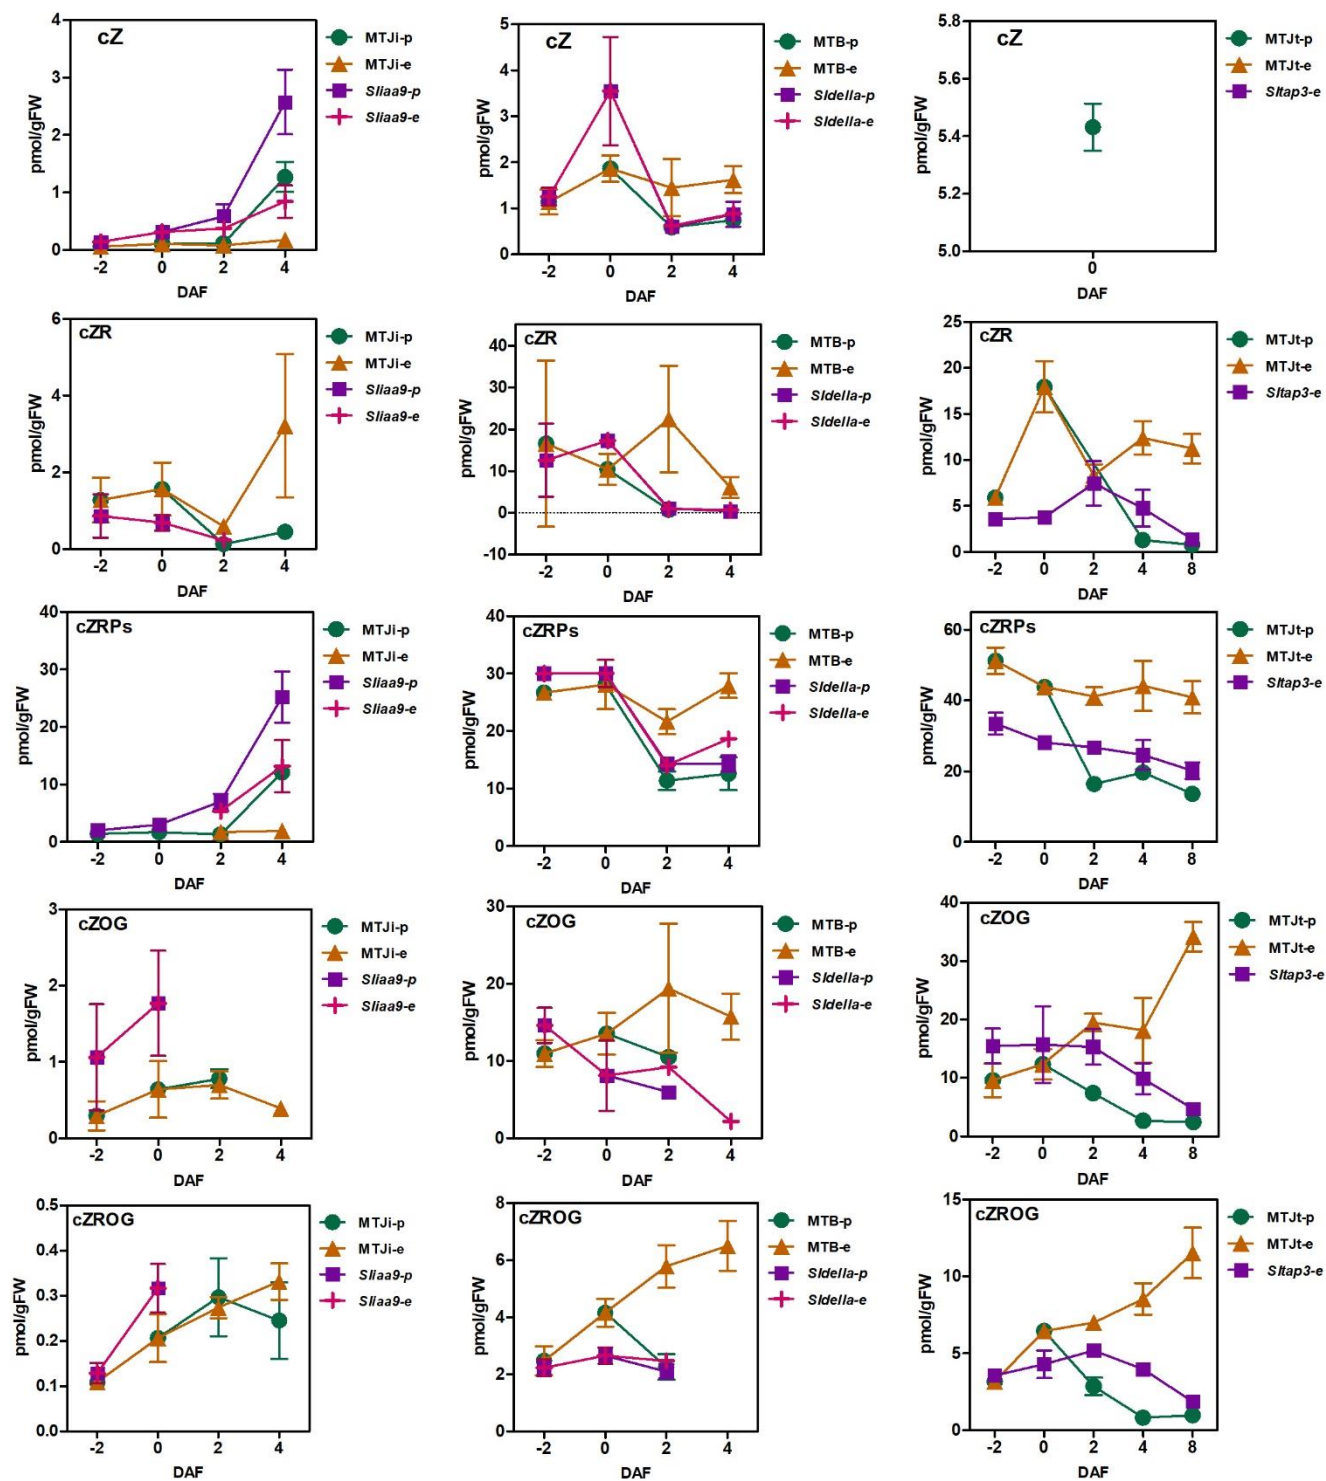

Figure S2 (continued).

Abbreviations: cZ, *cis*-zeatin; cZR, cZ riboside; cZRPs, cZR 5'-phosphates; cZOG, cZ-O-glucoside; cZROG, cZR-O-glucoside.

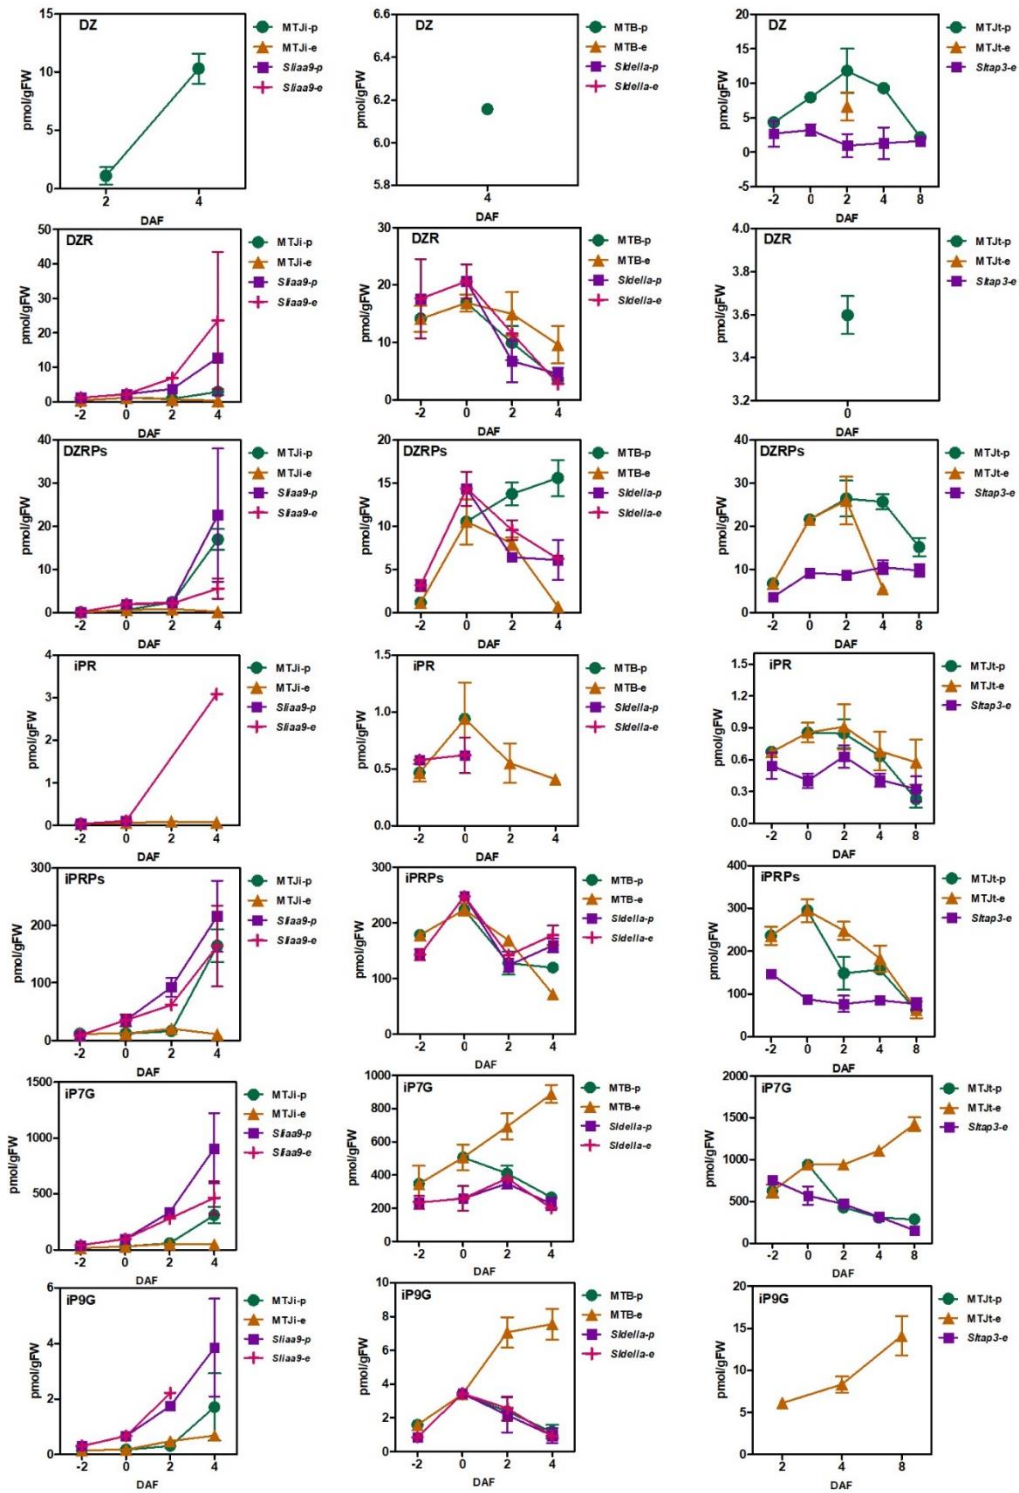

**Figure S2 (continued).**

Abbreviations: DZ, dihydrozeatin; DZR, DZ riboside; DZRPs, DZR 5'-monophosphate; iPR, isopentenyladenosine; iPRPs, iPR 5'-phosphates; iP7G, N6-isopentenyladenine-7-glucoside; iP9G, N6-isopentenyladenine-9-glucoside.

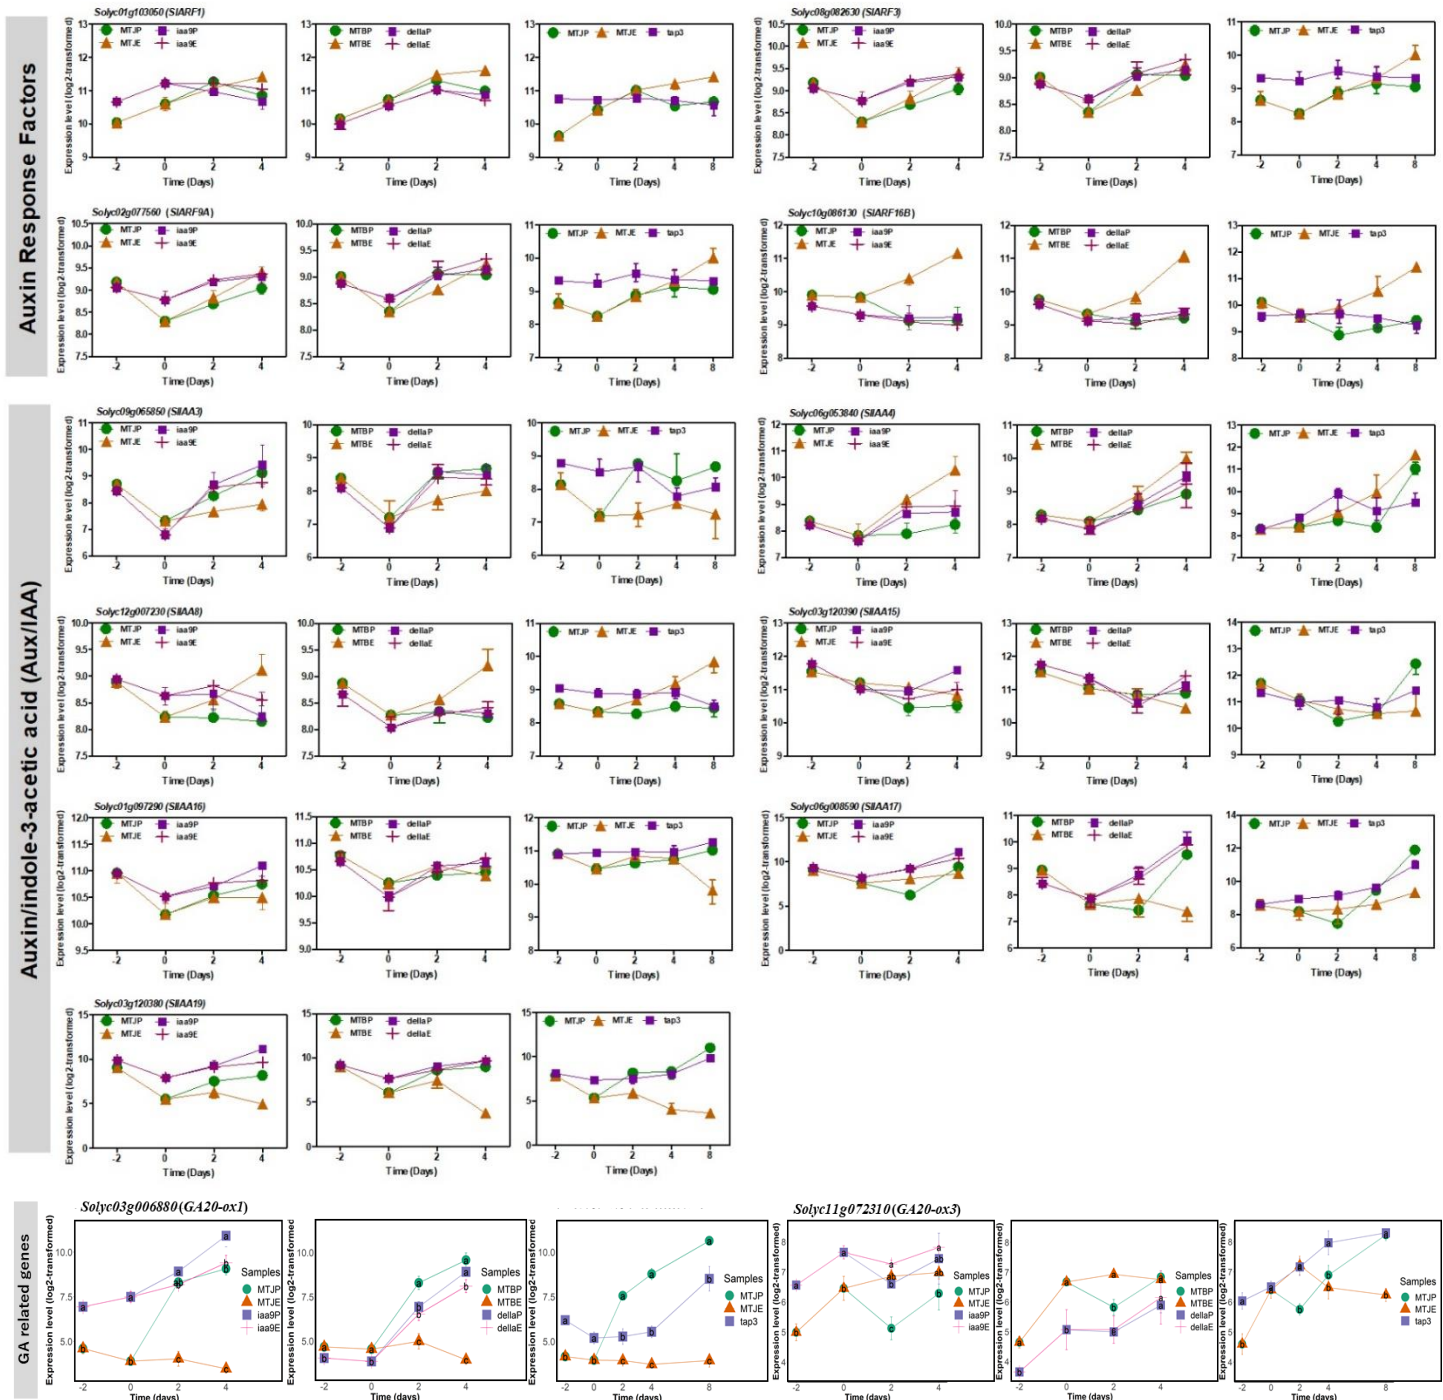



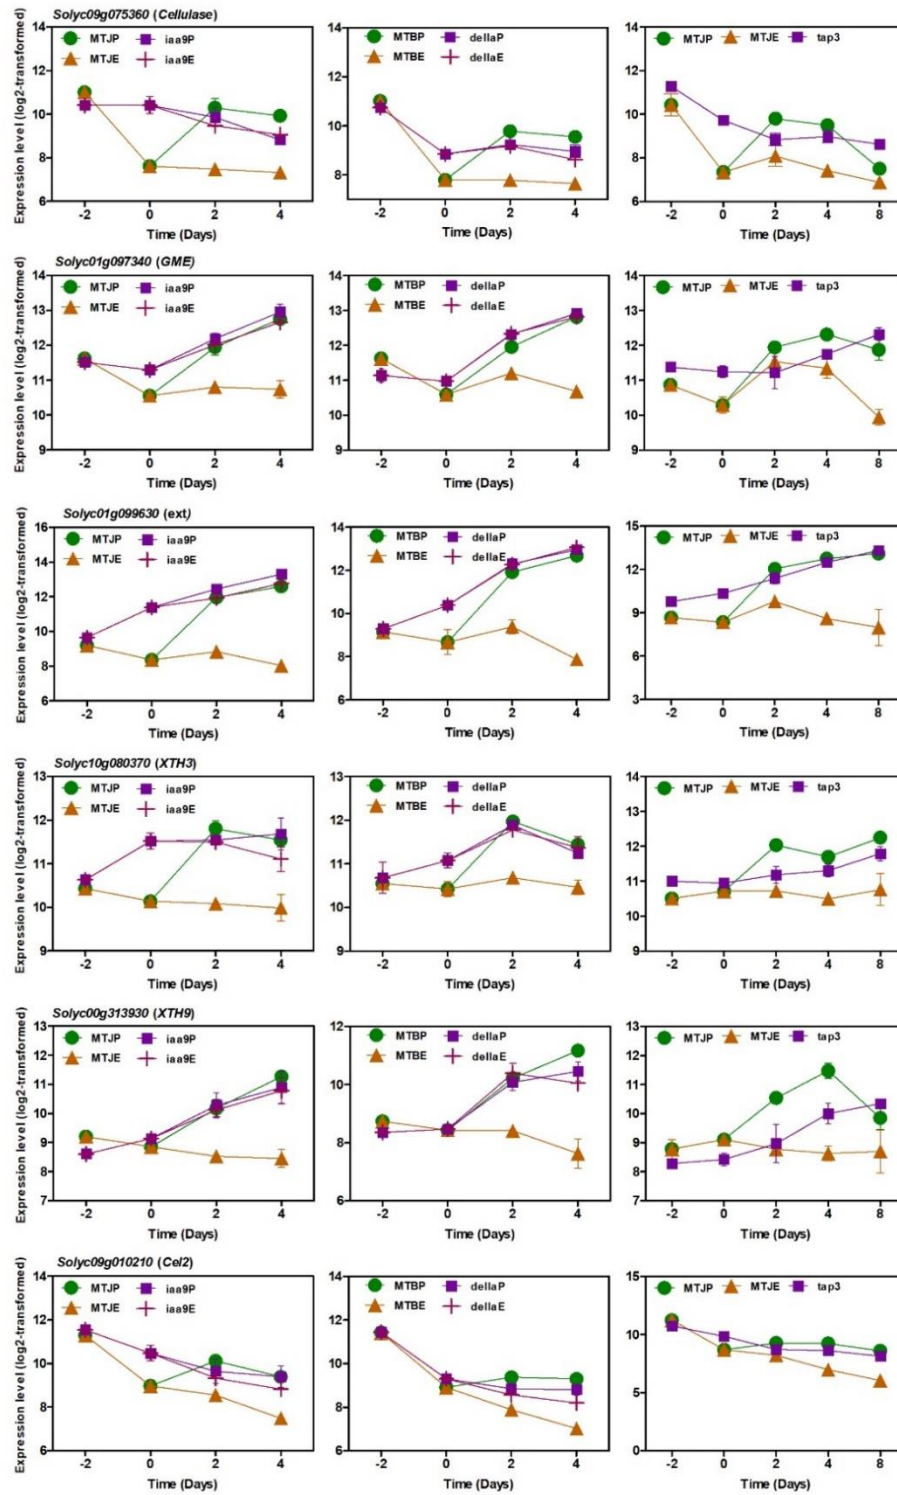

**Figure S4 (continued).**

Abbreviations: GME, GDP-mannose 3',5'-epimerase; ext, endo-xyloglucan transferase; XTH3, xyloglucan endotransglucosylase-hydrolase3; XTH9, xyloglucan endotransglucosylase-hydrolase9; and Cel2, endo-1,4-beta-glucanase precursor.

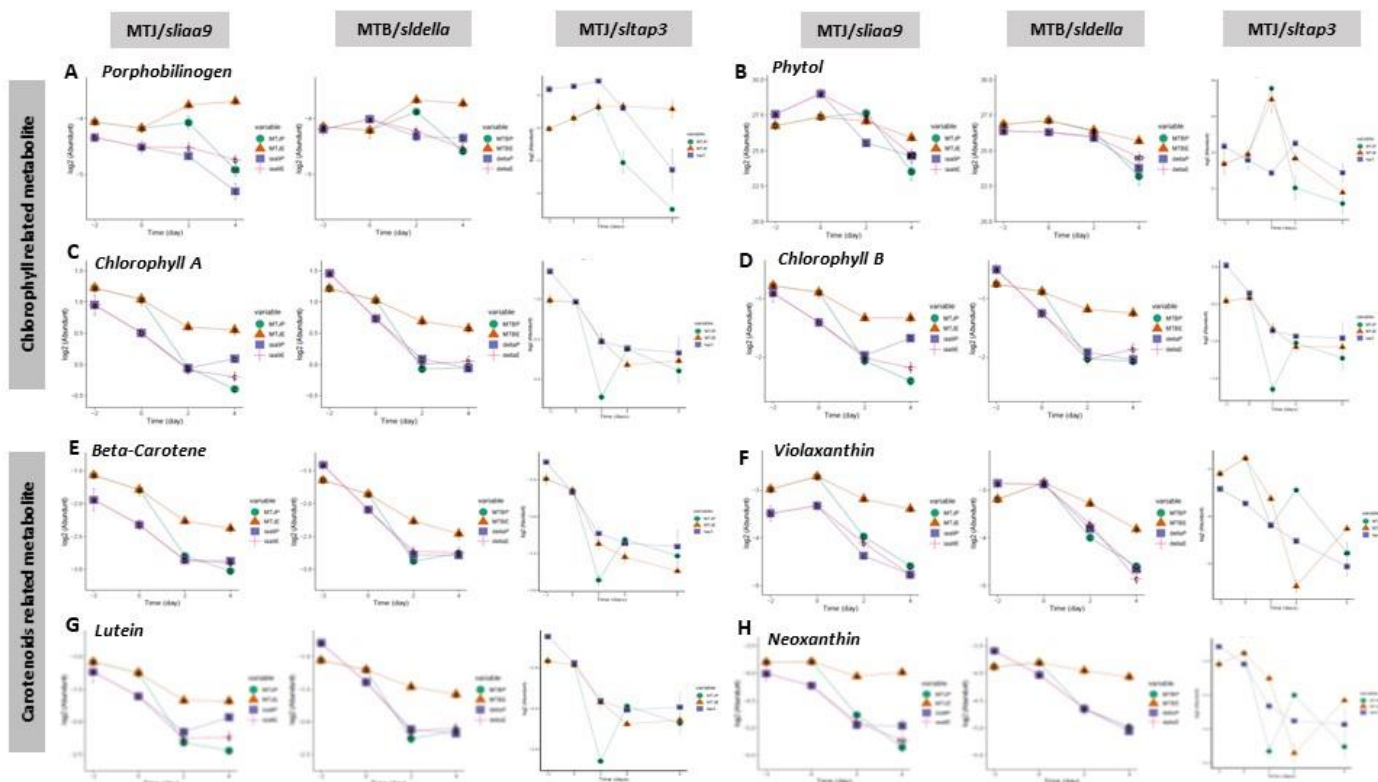

**Figure S5.** Changes of the photosynthesis- and carotenoid-related metabolites during fruit setting in MTJ/sltaa9, MTB/sldella and MTJ/sltap3.

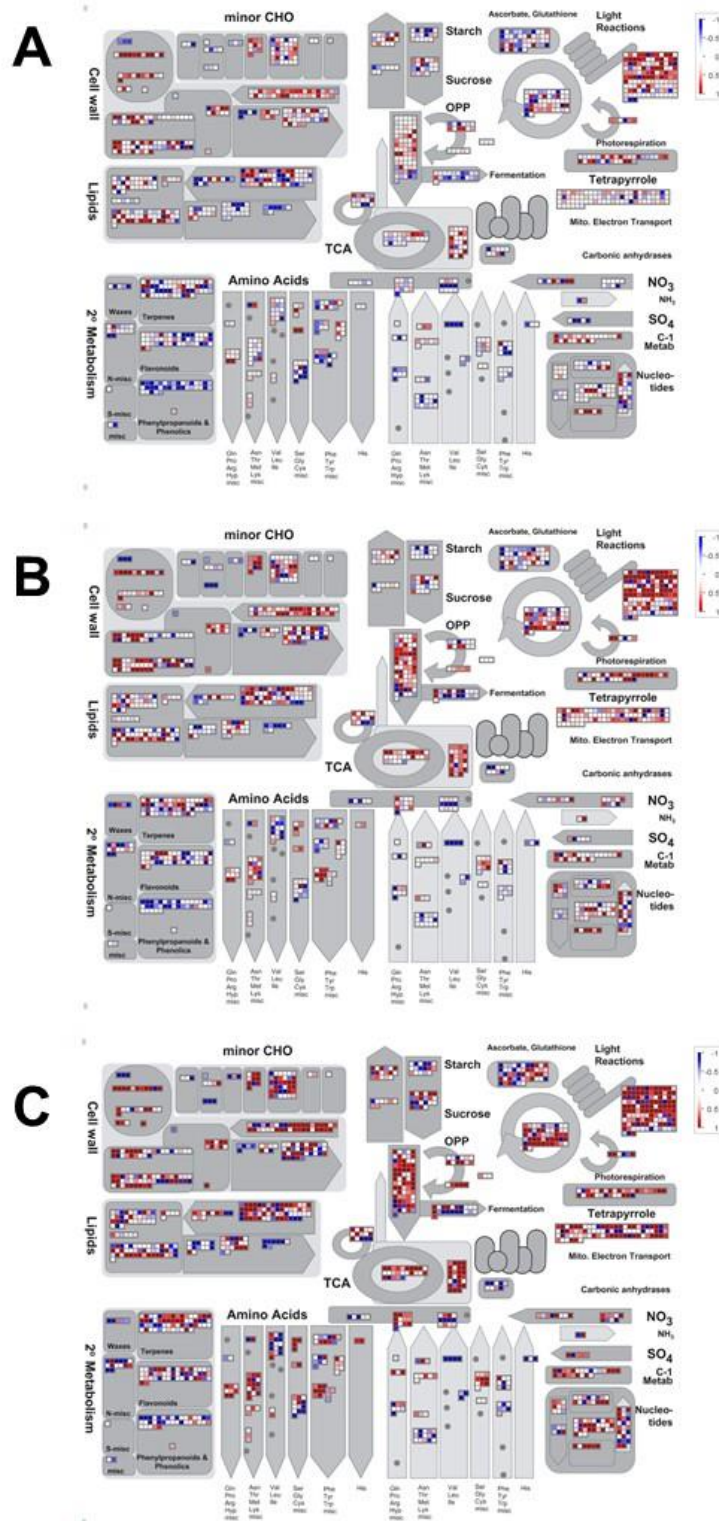

**Figure S6.** MapMan visualisation of DEGs in the profiles of MTJ/*sliaa9* at 0DAF (A), 2E-DAF (B) and 4E-DAF (C).

Significant,  $q\text{-value} \leq 0.05$ ;  $|\log_2FC| \geq 1$ .

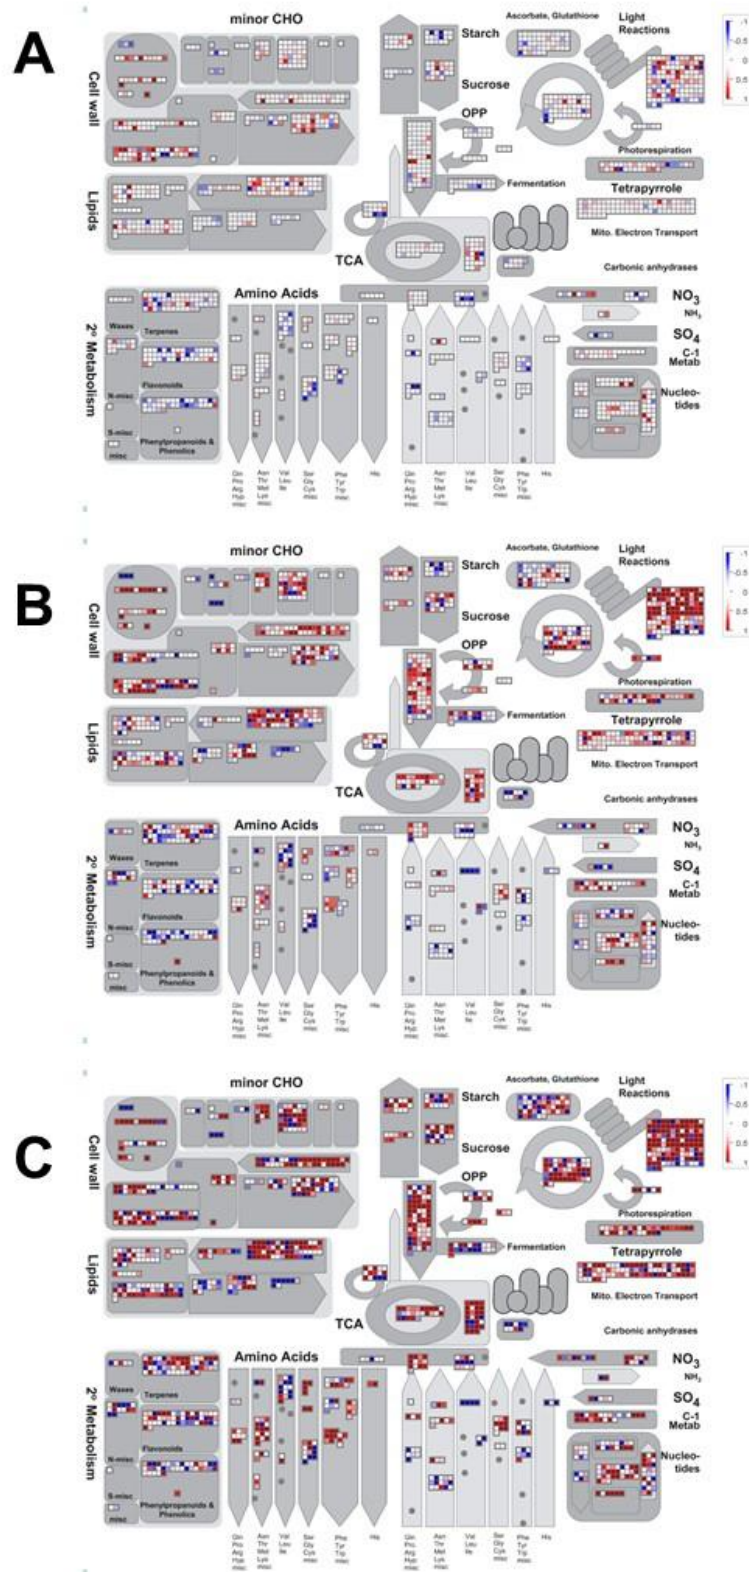

**Figure S7.** MapMan visualisation of DEGs in the profiles of MTJ/*sldella* at 0DAF (A), 2E-DAF (B) and 4E-DAF (C).

Significant,  $q\text{-value} \leq 0.05$ ;  $|\log_2\text{FC}| \geq 1$ .

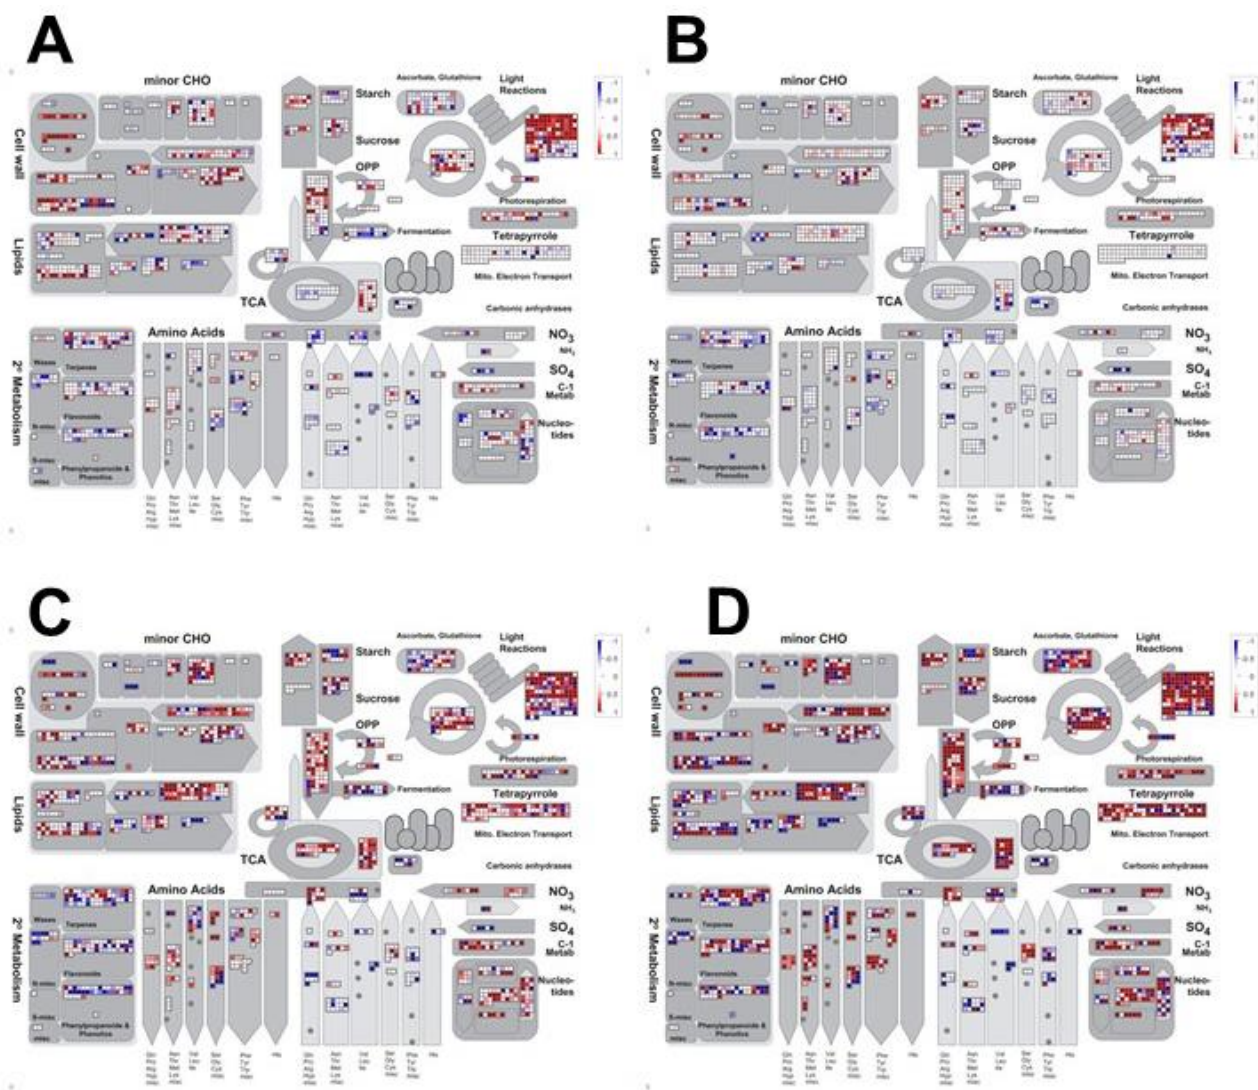

**Figure S8.** MapMan visualisation of DEGs in the profiles of MTJ/*sltap3* at 0DAF (A), 2E-DAF (B) and 4E-DAF (C).

Significant,  $q$ -value  $\leq 0.05$ ;  $|\log_2FC| \geq 1$ .

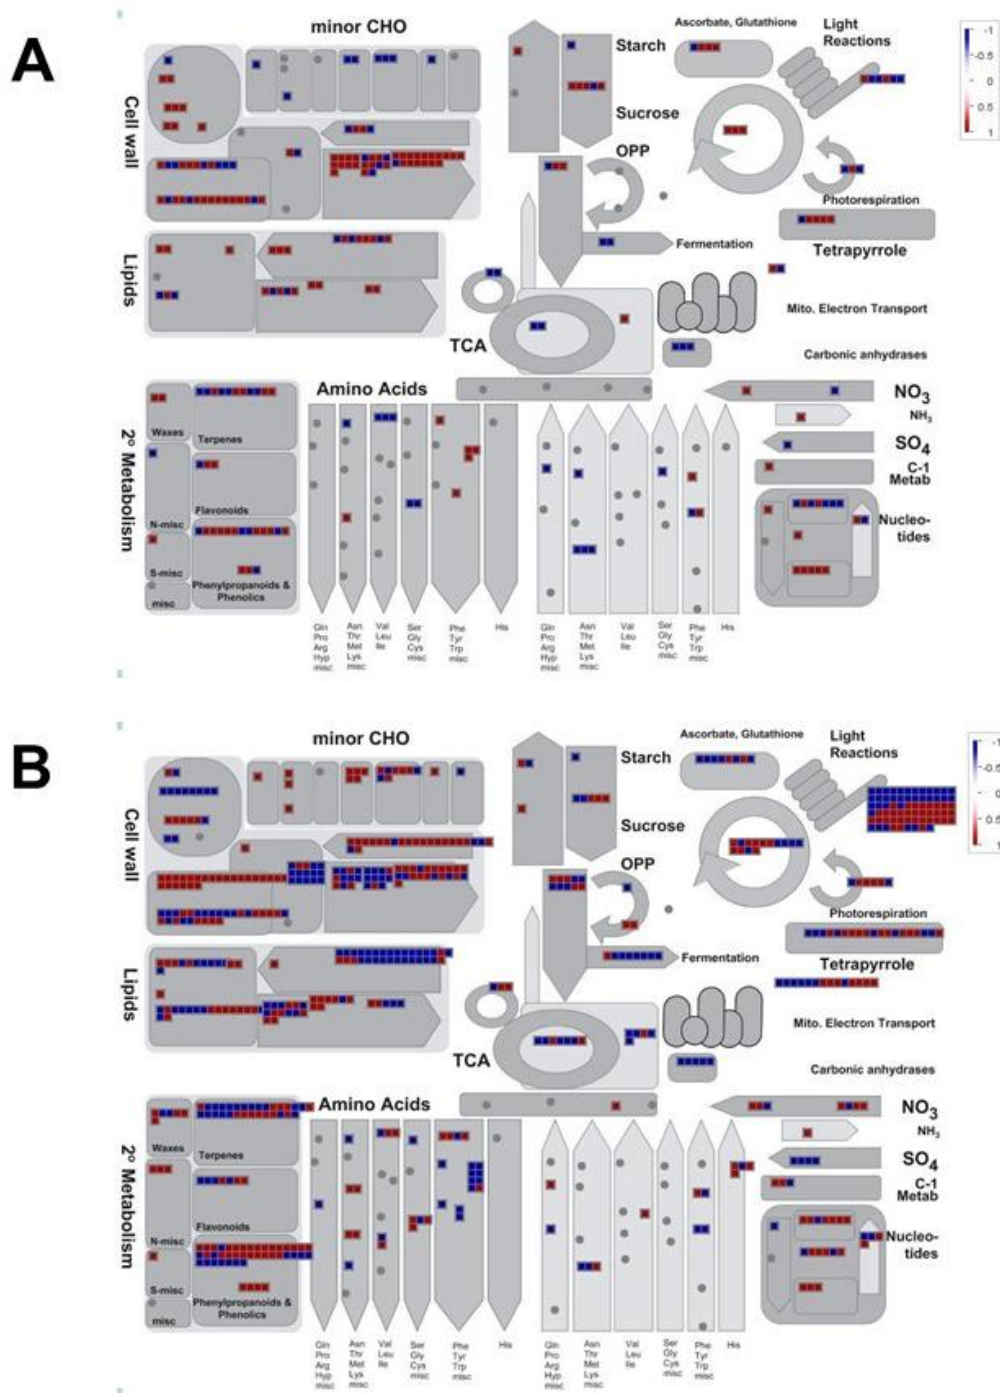

**Figure S9.** MapMan visualisation of DEGs in the profiles of Severianin/M82 at 0DAF (A) and 2E-DAF (B).

Significant,  $q\text{-value} \leq 0.05$ ;  $|\log_2\text{FC}| \geq 1$ .
