# Supplementary material for: Transcriptomic, Hormonomic and Metabolomic Analyses Highlighted the Common Modules Related to Photosynthesis, Sugar Metabolism and Cell Division in Parthenocarpic Tomato Fruits during Early Fruit Set
Source: Cells. 2022 Apr 22;11(9):1420. doi: 10.3390/cells11091420 (PMC9102895; doi:10.3390/cells11091420)
Supplement: Supplementary file 1 [file cells-11-01420-s001.zip › Supplementary Table S1.xlsx]

## Sheet: Table S1
Table S1. The previous study summarised phenotypes of parthenocarpic mutants related to SlIAA9, SlDELLA and SlTAP3.
Mutant name	Leaf morphology	Plant hight/Internode	Fruit size	Flower shape	Fruit set (%)	Parthenocarpic (%)	Rference
AS-iaa9	Promote simple and lobed simple leaves morphology	Axillary shoots fourfold to fivefold longer than those in control wild type plants	-	Normal	48 to 68	82	Wang et al., 2005
AS-iaa9	Fused leaves	Long internodes, increased lateral shoot numbers	Fruit width (horizontal arrow) 2.5-6 mm at anthesis to 8DAE	Normal	75	-	Wang et al., 2009
iaa9-3, iaa9-4, iaa9-5	Reduced complexity and only one pair of lobed major lateral leaflets merged with the terminal leaflet	-	>Fruit lengh (vertical arrow) ~ 6-8 mm >Fruit width (horizontal arrow) ~ 4-6 mm at 10DAE	Normal		iaa9-3 (70.0 ± 4.7 %) iaa9-5 (63.3 ± 5.4 %) iaa9-4 (40.0 ± 4.7 %)	Saito et al., 2011
iaa9-618	> Cotyledon aberrations consisted of ‘‘leafy’’ cotyledons and tricots > Exhibited leaves with a significant reduction in compoundness and a minimally lobed leaf margin	Longer axillary shoots at two out of three examined nodes compared to the WT (Length of axillary shoot at 2nd node 25.9 cm)	>Ovary weight at anthesis 7.5 mg >Ovary/fruitlet weight from unpollinated flowers 15 DAE is 53.2 mg	Carpelloid stamens (41%)	55.4	68.1	Mazzucato et al., 2015
SlIAA9-crispr MT	Simple leaves were observed in Micro-Tom CRISPR/Cas9 mutant lines	Longer internode	Mature fruit size is ~1.4 cm	Normal	-	higher than WT	Ueta et al., 2017
iaa9-3	Simple leaves	Longer internode	Fruit size ~2.01 g (12DAA)	Normal	63	-	Kim et al., 2019
pro	>Eight to nine leaves compared with six to seven leaves in the wild type > The leaves had reduced size and, in some cases, fewer leaflets, and they lacked the characteristic serrated borders of the wild type	Longer hypocotyls, longer internodes and thinner stems than WT	Fruit weigh is 2.3 ± 0.2 g (5DAA)	pro mutant flowers had longer sepals, petals, and stamens	100	95	Carrera et al., 2012
TOMJPE2753 (new Sldella) pro-2	Leaflets with smoother margins	Greater plant height than wild-type (15.2-17.9 in greenhouse)	Fruit weigh is 1.9 - 2.1 g (5DAA)	Flowers that contained an elongated style protruding from the anther	51.8 -81.9	75-89	Shinozaki et al., 2018
tap3 P119-TAP3 RNAi	Complete conversion of petals into sepals	-	> Reduced fruit weight and size (1.8-2.5 g) > Fruit size diameter is ~15 mm	> Stamens appearing carpelloid > Stamens were thin and whitish yellow compared with that of WT > It did not produce any pollen grains even at the anthesis stage	10-75	-	Okabe et al., 2018
